# Supplementary material for: m6A epitranscriptomic modification regulates neural progenitor-to-glial cell transition in the retina
Source: eLife. 2022 Dec 2;11:e79994. doi: 10.7554/eLife.79994 (PMC9718531; doi:10.7554/eLife.79994)
Supplement: Source data 1. [file elife-79994-data1.xlsx]

## Sheet: Sheet1
Gene	avg_logFC	p_val	p_val_adj	up_down
Zfp292	1.04255	1.40962e-52	2.61922e-48	upregulated
BC005561	0.789384	1.59622e-45	2.96594e-41	upregulated
Ash1l	0.781904	2.77407e-36	5.1545e-32	upregulated
Tnrc6c	0.734394	7.72305e-42	1.43502e-37	upregulated
Kcnq1ot1	0.728258	7.71889e-23	1.43425e-18	upregulated
Ckap4	0.712463	6.69305e-44	1.24364e-39	upregulated
Rbm15	0.686616	6.20143e-35	1.15229e-30	upregulated
Basp1	0.674687	1.60532e-43	2.98285e-39	upregulated
Sacs	0.637845	8.39014e-28	1.55897e-23	upregulated
Mrpl43	0.629342	3.12306e-40	5.80295e-36	upregulated
Nxt1	0.579701	1.46026e-31	2.71331e-27	upregulated
Ythdf2	0.573362	1.73025e-25	3.21499e-21	upregulated
Trim8	0.569227	1.27134e-22	2.36228e-18	upregulated
Setd1b	0.561892	2.61441e-20	4.85783e-16	upregulated
Rbmxl1	0.53811	1.38859e-29	2.58015e-25	upregulated
Apex1	0.523464	2.05091e-23	3.81079e-19	upregulated
Spen	0.52134	1.42352e-19	2.64504e-15	upregulated
Cenpb	0.5181	3.01379e-20	5.59992e-16	upregulated
Luzp1	0.514818	1.28437e-24	2.38648e-20	upregulated
Cdc42ep4	0.508107	1.68136e-16	3.12414e-12	upregulated
Cacna1i	0.504566	2.80365e-21	5.20947e-17	upregulated
Tpgs1	0.502911	3.75778e-24	6.98233e-20	upregulated
Prelp	0.501896	2.41966e-17	4.49597e-13	upregulated
Mrps34	0.497141	1.87128e-22	3.47702e-18	upregulated
Serpinh1	0.492292	3.68165e-20	6.84087e-16	upregulated
Bmyc	0.491348	4.00428e-24	7.44035e-20	upregulated
RF01962	0.490307	6.36224e-15	1.18217e-10	upregulated
Tnrc6a	0.47963	2.39909e-20	4.45776e-16	upregulated
Mdk	0.477435	5.53242e-26	1.02798e-21	upregulated
Son	0.475624	5.50913e-35	1.02365e-30	upregulated
Aen	0.475356	2.57682e-16	4.788e-12	upregulated
Xist	0.473557	5.1751e-09	9.61586e-05	upregulated
AW209491	0.473217	1.34255e-22	2.49459e-18	upregulated
Plekho1	0.470719	1.97641e-17	3.67236e-13	upregulated
Rplp1	0.47014	3.32836e-34	6.18443e-30	upregulated
Phax	0.462445	9.38508e-23	1.74384e-18	upregulated
Hsp90ab1	0.458066	4.45713e-32	8.28179e-28	upregulated
Lcmt2	0.442487	1.08415e-23	2.01445e-19	upregulated
Fen1	0.440397	2.78371e-15	5.17241e-11	upregulated
Rest	0.440374	2.99677e-18	5.5683e-14	upregulated
Rrs1	0.440252	4.2517e-17	7.90008e-13	upregulated
Bod1l	0.439631	2.61466e-13	4.8583e-09	upregulated
Eid2	0.439188	1.75735e-15	3.26534e-11	upregulated
Svbp	0.436059	1.3267e-18	2.46515e-14	upregulated
Rpp25l	0.43451	5.15226e-17	9.57341e-13	upregulated
Mrpl14	0.433447	2.25289e-18	4.18609e-14	upregulated
Gprc5c	0.433173	3.20421e-18	5.95374e-14	upregulated
Lsm10	0.430927	4.74594e-24	8.81844e-20	upregulated
Brca2	0.430786	3.14193e-12	5.83803e-08	upregulated
Bcl9l	0.429779	8.01187e-18	1.48869e-13	upregulated
Tgfb2	0.429089	3.81618e-13	7.09085e-09	upregulated
Mex3a	0.428347	1.56351e-16	2.90515e-12	upregulated
Zbtb1	0.427518	1.73378e-17	3.22153e-13	upregulated
Zfp451	0.426982	5.53196e-17	1.02789e-12	upregulated
Rlf	0.424851	1.32204e-13	2.45648e-09	upregulated
2810474O19Rik	0.424783	4.1386e-12	7.68993e-08	upregulated
Eef1a1	0.423555	2.06388e-46	3.8349e-42	upregulated
Plekha1	0.421876	4.12769e-14	7.66967e-10	upregulated
Ephb2	0.421365	4.79858e-15	8.91623e-11	upregulated
Kbtbd11	0.41915	2.94063e-19	5.46399e-15	upregulated
Fzd5	0.417134	6.42936e-14	1.19464e-09	upregulated
D10Wsu102e	0.415355	1.6696e-13	3.10228e-09	upregulated
Ppp1r14b	0.415167	1.34581e-14	2.50066e-10	upregulated
Prdm2	0.411702	3.68519e-12	6.84744e-08	upregulated
Faap100	0.409872	3.56372e-27	6.62174e-23	upregulated
Efnb1	0.408484	2.64889e-11	4.92191e-07	upregulated
Topors	0.397982	1.87958e-15	3.49245e-11	upregulated
Casp8ap2	0.395362	1.09448e-06	0.0203366	upregulated
Polr1d	0.394107	4.80551e-17	8.92911e-13	upregulated
3222401L13Rik	0.391484	3.17546e-16	5.90032e-12	upregulated
Zfp62	0.390843	3.04537e-14	5.6586e-10	upregulated
Knop1	0.389769	4.33583e-14	8.05641e-10	upregulated
Hspa5	0.388655	1.80669e-15	3.357e-11	upregulated
Bcl7a	0.387213	8.56962e-15	1.59232e-10	upregulated
Pop7	0.38241	6.04161e-15	1.12259e-10	upregulated
Nectin3	0.379982	7.70849e-12	1.43231e-07	upregulated
Auts2	0.378924	9.54747e-11	1.77402e-06	upregulated
Rpl41	0.378437	2.45337e-31	4.5586e-27	upregulated
Utp14b	0.3757	8.3748e-09	0.000155612	upregulated
Setd2	0.372773	3.29039e-10	6.11387e-06	upregulated
Ncl	0.372618	1.64076e-16	3.04869e-12	upregulated
Gjc1	0.372057	7.34544e-10	1.36486e-05	upregulated
Chd3	0.371338	1.44971e-12	2.69371e-08	upregulated
Nsmce3	0.370371	1.87427e-14	3.48258e-10	upregulated
Taf1d	0.370077	1.55356e-12	2.88668e-08	upregulated
Nfic	0.366344	2.39854e-13	4.45673e-09	upregulated
Timm8a1	0.365741	1.17761e-12	2.18812e-08	upregulated
Asxl2	0.365311	6.78953e-14	1.26156e-09	upregulated
Mki67	0.362939	0.0144756	1	upregulated
Car14	0.360971	3.33095e-13	6.18924e-09	upregulated
Tk1	0.360794	1.43729e-07	0.00267062	upregulated
Ndufaf4	0.359569	2.86485e-13	5.32318e-09	upregulated
Txnl4a	0.359344	1.38655e-13	2.57634e-09	upregulated
Fam122a	0.359243	2.42411e-14	4.50423e-10	upregulated
Lrrc4b	0.356824	1.51586e-16	2.81662e-12	upregulated
Imp3	0.356238	4.7657e-14	8.85515e-10	upregulated
Ankrd12	0.354792	4.84465e-10	9.00185e-06	upregulated
Fam208a	0.354052	2.4152e-13	4.48769e-09	upregulated
Arhgap5	0.352904	2.13765e-13	3.97197e-09	upregulated
Ankrd11	0.352085	2.02046e-11	3.75422e-07	upregulated
Rrp15	0.351283	9.23708e-13	1.71634e-08	upregulated
Nenf	0.350242	1.34424e-09	2.49774e-05	upregulated
Mrpl16	0.34839	5.3839e-14	1.00038e-09	upregulated
Thra	0.347954	6.90024e-13	1.28213e-08	upregulated
Traf4	0.346892	3.76126e-13	6.9888e-09	upregulated
Gas1	0.345812	1.40025e-07	0.00260181	upregulated
Fignl1	0.344562	8.64469e-10	1.60627e-05	upregulated
Sac3d1	0.344516	2.42156e-15	4.49951e-11	upregulated
Sar1a	0.343326	1.56784e-12	2.9132e-08	upregulated
Zfp609	0.343274	4.54107e-12	8.43777e-08	upregulated
Lcorl	0.34267	1.46347e-08	0.000271927	upregulated
Irf2bp2	0.339695	8.13098e-12	1.51082e-07	upregulated
Mrps12	0.339538	3.32507e-13	6.17831e-09	upregulated
Guk1	0.338993	2.08659e-13	3.87709e-09	upregulated
Slc35b2	0.33884	2.32706e-12	4.32391e-08	upregulated
Rab9	0.33671	9.86265e-16	1.83258e-11	upregulated
Eef2	0.336042	2.03224e-19	3.7761e-15	upregulated
Mab21l1	0.334116	1.63096e-09	3.03049e-05	upregulated
Btg2	0.333965	0.000551105	1	upregulated
Gemin7	0.333633	7.89456e-12	1.46689e-07	upregulated
4632415L05Rik	0.333136	2.36532e-08	0.000439501	upregulated
Meis1	0.332196	9.42578e-11	1.7514e-06	upregulated
Hspd1	0.331859	1.67807e-11	3.11803e-07	upregulated
Ywhah	0.331821	5.78081e-12	1.07413e-07	upregulated
Sfxn1	0.330828	7.56328e-12	1.40533e-07	upregulated
Msl1	0.33054	9.99112e-12	1.85645e-07	upregulated
Tst	0.329563	6.61353e-20	1.22886e-15	upregulated
Lgals1	0.329485	5.13897e-11	9.54872e-07	upregulated
Rai1	0.328272	9.98636e-10	1.85557e-05	upregulated
Ptch1	0.328133	2.74629e-06	0.0510288	upregulated
Arf6	0.327887	1.44828e-10	2.69105e-06	upregulated
Mir124-2hg	0.326862	3.83737e-09	7.13022e-05	upregulated
Psmd7	0.326471	1.35096e-15	2.51022e-11	upregulated
Six3	0.326092	3.08629e-18	5.73464e-14	upregulated
Zkscan1	0.324447	5.47877e-12	1.01801e-07	upregulated
Prr7	0.324175	2.97878e-11	5.53486e-07	upregulated
Gm37494	0.323551	1.24679e-10	2.31666e-06	upregulated
Map1a	0.322212	1.90528e-10	3.5402e-06	upregulated
Zfp318	0.322021	9.90834e-10	1.84107e-05	upregulated
Zranb1	0.321283	3.36083e-07	0.00624476	upregulated
Mrps7	0.321216	2.76724e-09	5.14182e-05	upregulated
Rnf113a2	0.321213	6.05532e-14	1.12514e-09	upregulated
Rfx7	0.320764	7.12561e-10	1.32401e-05	upregulated
Nufip2	0.320383	2.35057e-08	0.00043676	upregulated
Snhg20	0.319381	1.78305e-12	3.31308e-08	upregulated
Tigd2	0.31903	1.43837e-11	2.67264e-07	upregulated
Gpatch8	0.316148	8.22767e-12	1.52878e-07	upregulated
Ahdc1	0.314413	2.32561e-12	4.32121e-08	upregulated
2610037D02Rik	0.314325	8.28919e-09	0.000154021	upregulated
Trib2	0.314109	3.16113e-08	0.000587369	upregulated
Ndnf	0.31373	4.69365e-09	8.72127e-05	upregulated
Riox1	0.313492	2.76791e-12	5.14305e-08	upregulated
Dynll2	0.312902	1.61169e-07	0.00299469	upregulated
Dtx1	0.312433	3.46358e-11	6.43568e-07	upregulated
Mrpl46	0.311672	6.005e-13	1.11579e-08	upregulated
Pcbp1	0.308475	4.06368e-13	7.55072e-09	upregulated
Rimklb	0.308095	1.35127e-12	2.5108e-08	upregulated
Zbtb12	0.307374	2.89896e-08	0.000538656	upregulated
Tmem11	0.307068	1.91885e-12	3.56542e-08	upregulated
Dot1l	0.306615	1.36979e-10	2.54521e-06	upregulated
Tnrc6b	0.305542	1.44821e-07	0.00269092	upregulated
Snap47	0.305296	3.09981e-11	5.75976e-07	upregulated
Rpl39	0.305163	9.69023e-20	1.80054e-15	upregulated
Nr2f6	0.304373	2.24966e-09	4.18009e-05	upregulated
Smad7	0.304242	4.48114e-08	0.00083264	upregulated
BC034090	0.302969	1.17832e-22	2.18944e-18	upregulated
Pgp	0.302869	3.43143e-09	6.37594e-05	upregulated
Slc25a4	0.302177	4.82825e-12	8.97137e-08	upregulated
Mn1	0.299891	6.64798e-12	1.23526e-07	upregulated
Zcchc3	0.298699	6.6883e-09	0.000124275	upregulated
Nsrp1	0.29845	1.31004e-08	0.000243419	upregulated
Polr2l	0.298373	1.33503e-10	2.48062e-06	upregulated
Pck2	0.29698	8.4336e-11	1.56705e-06	upregulated
Ankrd10	0.29695	1.69946e-05	0.315776	upregulated
Mrps17	0.296693	3.91783e-09	7.27973e-05	upregulated
Wdr6	0.295393	6.70816e-08	0.00124644	upregulated
Hpcal1	0.295207	1.16905e-14	2.17221e-10	upregulated
Nsd1	0.294619	6.00331e-07	0.0111548	upregulated
Trim27	0.294292	7.9891e-10	1.48446e-05	upregulated
Cdc26	0.294031	3.69318e-09	6.8623e-05	upregulated
Phlda3	0.293974	4.17044e-06	0.0774909	upregulated
P3h4	0.293847	5.5173e-15	1.02517e-10	upregulated
Tsix	0.293011	3.02481e-05	0.56204	upregulated
Wdr66	0.2926	1.67242e-07	0.00310752	upregulated
Lzts2	0.292317	9.93277e-10	1.84561e-05	upregulated
Snhg6	0.290492	7.57036e-10	1.40665e-05	upregulated
Slc25a28	0.290303	2.16191e-11	4.01705e-07	upregulated
Lpar6	0.290076	2.27479e-09	4.22678e-05	upregulated
Zfp579	0.290001	4.54276e-08	0.00084409	upregulated
Nrip1	0.289848	9.43482e-10	1.75308e-05	upregulated
Hyal2	0.289338	6.86254e-14	1.27513e-09	upregulated
Tenm4	0.288868	7.66587e-08	0.0014244	upregulated
Rps12	0.288573	4.46502e-15	8.29645e-11	upregulated
Bag5	0.288557	1.30074e-11	2.41691e-07	upregulated
Gadd45gip1	0.287182	6.11057e-09	0.00011354	upregulated
Pex13	0.287181	4.3417e-10	8.06731e-06	upregulated
Coa7	0.286716	3.31865e-12	6.16639e-08	upregulated
Lonrf2	0.286671	9.99483e-09	0.000185714	upregulated
C1qbp	0.286646	1.08837e-09	2.0223e-05	upregulated
Map1s	0.286455	1.47258e-10	2.7362e-06	upregulated
Vldlr	0.28581	2.97639e-06	0.0553044	upregulated
Zcchc11	0.2855	1.63857e-09	3.04463e-05	upregulated
Hmox2	0.285251	8.525e-08	0.00158403	upregulated
Ctxn1	0.284605	3.2247e-08	0.000599181	upregulated
Kmt2a	0.284474	3.30357e-08	0.000613836	upregulated
Sox12	0.284272	1.3606e-11	2.52813e-07	upregulated
Rbm4b	0.284176	5.8134e-06	0.108019	upregulated
Rps21	0.282856	9.93752e-16	1.84649e-11	upregulated
Gm3764	0.281857	4.38146e-08	0.000814119	upregulated
Ube2r2	0.281815	3.57675e-08	0.000664595	upregulated
Ttc3	0.281521	5.47098e-08	0.00101656	upregulated
Nfe2l1	0.281421	7.03167e-13	1.30656e-08	upregulated
Cyp1b1	0.281376	2.76195e-13	5.13198e-09	upregulated
Rnf38	0.280305	1.50576e-06	0.0279785	upregulated
Slc3a2	0.279565	1.49878e-08	0.000278489	upregulated
Ube2o	0.279185	9.29283e-08	0.0017267	upregulated
Med18	0.277897	6.83233e-11	1.26951e-06	upregulated
Eif4ebp1	0.277838	8.85833e-12	1.64597e-07	upregulated
Ythdc1	0.277697	6.06368e-08	0.00112669	upregulated
Tcf20	0.276815	4.29266e-10	7.97619e-06	upregulated
Gm10600	0.276661	1.89232e-06	0.0351613	upregulated
Ccdc59	0.276354	8.1102e-07	0.0150696	upregulated
Zfp704	0.276029	9.04589e-06	0.168082	upregulated
Zfp462	0.275428	1.91035e-08	0.000354961	upregulated
Six6	0.275113	2.68488e-07	0.00498878	upregulated
Ptprf	0.273524	2.33468e-06	0.0433807	upregulated
Hnrnpa0	0.273501	3.01786e-17	5.60749e-13	upregulated
Irf2bp1	0.273477	6.66684e-08	0.00123877	upregulated
Senp6	0.27209	6.16815e-08	0.0011461	upregulated
Zfp516	0.27186	1.24491e-10	2.31316e-06	upregulated
Rax	0.270387	4.6524e-07	0.00864462	upregulated
Llph	0.270101	6.71637e-08	0.00124797	upregulated
Prr12	0.268826	5.20486e-11	9.67115e-07	upregulated
Slc2a1	0.268153	1.38482e-05	0.257314	upregulated
Spon1	0.267832	5.09046e-06	0.0945858	upregulated
Twnk	0.267826	5.66076e-12	1.05183e-07	upregulated
Kcnh2	0.26741	5.35393e-17	9.94814e-13	upregulated
Enah	0.267383	1.54177e-07	0.00286477	upregulated
Sparc	0.266666	9.23447e-06	0.171586	upregulated
Zbed4	0.266534	5.5113e-10	1.02405e-05	upregulated
Foxn3	0.265719	1.19469e-06	0.0221986	upregulated
Rraga	0.265632	1.28051e-08	0.000237931	upregulated
Nudt16	0.265571	2.51848e-08	0.000467958	upregulated
Bax	0.265542	8.38955e-06	0.155886	upregulated
Unc13c	0.265539	6.81036e-07	0.0126543	upregulated
Serbp1	0.265305	5.19241e-16	9.64801e-12	upregulated
Zranb2	0.26507	1.54229e-05	0.286574	upregulated
Acads	0.265011	8.50369e-10	1.58007e-05	upregulated
Igf2bp1	0.264049	1.06576e-06	0.019803	upregulated
Mrpl51	0.263784	2.74069e-09	5.09247e-05	upregulated
Emc6	0.263208	5.47771e-11	1.01781e-06	upregulated
Kcnk1	0.263079	1.13174e-06	0.0210288	upregulated
Marcksl1	0.26303	2.49328e-11	4.63276e-07	upregulated
Med7	0.262949	1.7652e-06	0.0327992	upregulated
Ttc28	0.262643	6.5381e-08	0.00121484	upregulated
Sap30bp	0.262582	9.62063e-08	0.00178761	upregulated
Ikbip	0.261686	9.90302e-16	1.84008e-11	upregulated
Qser1	0.261647	8.05498e-09	0.00014967	upregulated
Smim15	0.261354	5.55383e-07	0.0103196	upregulated
Vcpip1	0.261298	2.75304e-06	0.0511543	upregulated
Dyrk3	0.261002	1.00938e-11	1.87553e-07	upregulated
Ddit4l	0.260756	1.41236e-07	0.00262431	upregulated
Rps29	0.260345	1.95295e-18	3.62878e-14	upregulated
Enho	0.258706	3.29916e-06	0.0613018	upregulated
Phf21a	0.25862	4.39817e-09	8.17224e-05	upregulated
Pde10a	0.25773	8.90185e-08	0.00165405	upregulated
Fam53a	0.25706	1.15842e-06	0.0215247	upregulated
Thap2	0.256114	3.234e-07	0.0060091	upregulated
Zfp553	0.255928	1.25421e-08	0.000233045	upregulated
Eif1a	0.255805	9.77261e-07	0.0181585	upregulated
Tpst2	0.255511	5.08155e-12	9.44202e-08	upregulated
Arid1a	0.255403	1.05373e-06	0.0195793	upregulated
Anp32b	0.255172	1.05076e-07	0.00195241	upregulated
Cog8	0.255052	2.80463e-11	5.21128e-07	upregulated
Zfp639	0.255011	1.97986e-07	0.00367877	upregulated
Pja1	0.254667	2.861e-07	0.00531602	upregulated
Fam69b	0.254095	1.21618e-12	2.25979e-08	upregulated
Fam171a2	0.253662	6.97209e-13	1.29548e-08	upregulated
Rcn1	0.25324	4.14656e-06	0.0770473	upregulated
Wdr18	0.252305	8.99753e-11	1.67183e-06	upregulated
Mrpl50	0.251523	1.42791e-07	0.0026532	upregulated
Kmt2b	0.251203	1.75264e-08	0.000325657	upregulated
Tmem132a	0.251048	2.97403e-10	5.52604e-06	upregulated
Bri3bp	0.250563	1.84474e-08	0.00034277	upregulated
Zfp60	0.250483	2.45893e-08	0.000456895	upregulated
Palld	0.25005	2.0552e-09	3.81877e-05	upregulated
Rbm3	-0.250867	4.39322e-15	8.16304e-11	downregulated
Ywhae	-0.251502	8.593e-12	1.59667e-07	downregulated
Peg3	-0.252007	3.01396e-06	0.0560025	downregulated
Rnaseh2b	-0.252547	7.7307e-07	0.0143644	downregulated
Cycs	-0.25344	1.48435e-07	0.00275807	downregulated
Rab2a	-0.253501	6.0822e-07	0.0113013	downregulated
Atp5f1	-0.253563	5.40318e-11	1.00396e-06	downregulated
Ifitm2	-0.253913	1.39374e-07	0.00258971	downregulated
Cox20	-0.254502	1.6672e-07	0.00309782	downregulated
Rbbp4	-0.254677	3.57914e-08	0.000665039	downregulated
Aes	-0.254766	1.56121e-09	2.90089e-05	downregulated
2310009B15Rik	-0.254925	2.25644e-07	0.0041927	downregulated
Tyms	-0.255353	0.000451957	1	downregulated
Sdf2l1	-0.255597	1.75971e-06	0.0326971	downregulated
Sumo2	-0.256528	2.94372e-15	5.46972e-11	downregulated
Gad2	-0.256806	3.0497e-10	5.66664e-06	downregulated
Csrp2	-0.256919	1.61895e-09	3.00817e-05	downregulated
Hook1	-0.256926	1.81996e-05	0.338166	downregulated
Ptms	-0.257139	0.00134712	1	downregulated
Ube2a	-0.257157	4.09693e-09	7.61251e-05	downregulated
Ndufb7	-0.258419	7.14892e-09	0.000132834	downregulated
Kif22	-0.258769	8.75987e-06	0.162767	downregulated
Pdlim1	-0.259224	2.49609e-09	4.63798e-05	downregulated
Anp32e	-0.259347	5.5279e-07	0.0102714	downregulated
Nde1	-0.260169	0.000546409	1	downregulated
Phgdh	-0.260736	1.17783e-06	0.0218852	downregulated
Dynlt1f	-0.261974	1.7243e-08	0.000320393	downregulated
Mpc1	-0.262073	7.47487e-10	1.38891e-05	downregulated
Wipi1	-0.26268	8.55895e-07	0.0159034	downregulated
Rgcc	-0.263316	2.36935e-10	4.4025e-06	downregulated
Vdac3	-0.263638	2.75843e-09	5.12544e-05	downregulated
Ezr	-0.263653	3.35068e-06	0.0622589	downregulated
Fam216a	-0.264221	3.03776e-08	0.000564446	downregulated
Ckb	-0.264746	1.52686e-20	2.83707e-16	downregulated
Gm13889	-0.266268	8.12868e-07	0.0151039	downregulated
Top2a	-0.266917	0.0041632	1	downregulated
Prelid1	-0.268322	4.68007e-07	0.00869604	downregulated
Itgb3bp	-0.268998	9.5676e-09	0.000177775	downregulated
Dpysl3	-0.269068	2.44085e-06	0.0453534	downregulated
Uchl1	-0.269138	2.7233e-08	0.000506017	downregulated
Wbp2	-0.26985	4.79237e-07	0.0089047	downregulated
Banf1	-0.270831	5.18917e-11	9.642e-07	downregulated
Cox5b	-0.270835	1.60548e-12	2.98314e-08	downregulated
Ldha	-0.271712	1.49289e-07	0.00277393	downregulated
Ptma	-0.272489	5.42352e-25	1.00774e-20	downregulated
Rbx1	-0.273456	2.97006e-13	5.51867e-09	downregulated
Rrm2	-0.274552	0.00874938	1	downregulated
Hist1h1e	-0.27521	0.00145358	1	downregulated
Cox4i2	-0.275316	3.76377e-05	0.699347	downregulated
Gapdh	-0.276319	9.30573e-17	1.7291e-12	downregulated
Cltb	-0.276463	2.61182e-05	0.485302	downregulated
Igsf9	-0.27729	1.15219e-06	0.0214089	downregulated
Mfge8	-0.277428	8.07998e-07	0.0150134	downregulated
Rpl24	-0.277776	8.09593e-17	1.5043e-12	downregulated
Mtch1	-0.277877	1.14106e-06	0.021202	downregulated
Hist1h4d	-0.278286	0.0171455	1	downregulated
Hist3h2ba	-0.278463	2.36166e-06	0.043882	downregulated
Acyp1	-0.278815	9.83218e-11	1.82692e-06	downregulated
Tspan7	-0.279076	1.1312e-07	0.00210188	downregulated
Bnip3l	-0.281056	3.11212e-08	0.000578264	downregulated
Ift74	-0.281299	4.03893e-05	0.750473	downregulated
Ppp1cc	-0.281419	8.09359e-09	0.000150387	downregulated
Ube2d3	-0.28242	2.17427e-11	4.04001e-07	downregulated
Atp5j	-0.282844	8.9878e-12	1.67002e-07	downregulated
Esd	-0.286304	6.96846e-11	1.29481e-06	downregulated
Ndc80	-0.286456	4.21361e-06	0.0782931	downregulated
Mapre1	-0.286678	2.04774e-11	3.80491e-07	downregulated
Bloc1s1	-0.286736	8.20402e-08	0.00152439	downregulated
Ccnb1	-0.286802	0.00371771	1	downregulated
Larp1b	-0.287906	5.22189e-09	9.70279e-05	downregulated
Ptges3	-0.288628	7.58861e-11	1.41004e-06	downregulated
H3f3a	-0.2892	3.92955e-26	7.3015e-22	downregulated
1300002E11Rik	-0.289403	4.53845e-09	8.4329e-05	downregulated
Calm2	-0.292224	5.24372e-06	0.0974335	downregulated
Smdt1	-0.293323	1.43749e-10	2.67101e-06	downregulated
Cope	-0.293488	3.8905e-09	7.22893e-05	downregulated
Smim20	-0.294008	3.31279e-11	6.1555e-07	downregulated
Elob	-0.294946	3.43827e-15	6.38864e-11	downregulated
Selenoh	-0.295165	2.29724e-09	4.2685e-05	downregulated
Ppia	-0.295185	1.59267e-26	2.95935e-22	downregulated
Tspan13	-0.295351	2.06713e-08	0.000384094	downregulated
Aldh1a1	-0.296588	2.36277e-08	0.000439026	downregulated
Acat1	-0.296897	2.3358e-08	0.000434016	downregulated
Btf3	-0.298092	1.68219e-17	3.12568e-13	downregulated
Gm45768	-0.29978	6.13003e-16	1.13902e-11	downregulated
Smc1a	-0.300517	4.6988e-08	0.000873083	downregulated
Lockd	-0.303808	1.01051e-06	0.0187763	downregulated
Psmc4	-0.303908	3.79122e-10	7.04446e-06	downregulated
E2f1	-0.304738	1.73373e-05	0.322145	downregulated
Melk	-0.305011	1.15169e-06	0.0213996	downregulated
Hist1h1c	-0.305332	0.000148242	1	downregulated
Cntn1	-0.305412	6.81485e-11	1.26627e-06	downregulated
Tmsb10	-0.305476	2.95001e-13	5.48141e-09	downregulated
Ppp3ca	-0.305633	6.35912e-12	1.18159e-07	downregulated
Plekhb1	-0.306113	3.36087e-11	6.24483e-07	downregulated
Arpp19	-0.307554	7.34984e-12	1.36567e-07	downregulated
2900026A02Rik	-0.308113	1.00027e-06	0.0185859	downregulated
Raly	-0.308465	1.15992e-11	2.15525e-07	downregulated
Dut	-0.308699	5.66348e-06	0.105233	downregulated
Sulf1	-0.30884	4.06669e-12	7.55632e-08	downregulated
Hes6	-0.30919	1.71717e-05	0.319067	downregulated
H2afz	-0.309826	3.90377e-12	7.25359e-08	downregulated
Eif2s3y	-0.310182	3.12906e-08	0.00058141	downregulated
Dusp1	-0.310509	1.57806e-06	0.029322	downregulated
Bsg	-0.311723	2.96787e-13	5.5146e-09	downregulated
Ppp1ca	-0.311987	4.74823e-16	8.82269e-12	downregulated
Larp7	-0.312854	2.38476e-10	4.43112e-06	downregulated
Aldoa	-0.314069	1.93149e-07	0.00358891	downregulated
Lmnb1	-0.314482	1.09697e-09	2.03829e-05	downregulated
Acsl3	-0.31515	4.74837e-13	8.82294e-09	downregulated
Psmd8	-0.315635	6.56961e-11	1.2207e-06	downregulated
Bub3	-0.316391	6.79155e-06	0.126194	downregulated
Mrpl23	-0.317223	2.53056e-09	4.70204e-05	downregulated
Ptgds	-0.318356	9.28826e-12	1.72585e-07	downregulated
Atp5h	-0.319135	1.56203e-16	2.90241e-12	downregulated
Cyr61	-0.319201	0.0101694	1	downregulated
Hmgn1	-0.319996	3.39588e-23	6.30989e-19	downregulated
Ubb	-0.323151	2.82096e-09	5.24163e-05	downregulated
Ier2	-0.326018	1.84472e-08	0.000342768	downregulated
H2afy	-0.326135	5.78312e-16	1.07456e-11	downregulated
Ezh2	-0.326686	4.17365e-10	7.75507e-06	downregulated
Ccdc34	-0.327858	7.59361e-08	0.00141097	downregulated
Fkbp2	-0.328887	1.17344e-11	2.18037e-07	downregulated
Mapt	-0.329542	6.8708e-11	1.27666e-06	downregulated
Sat1	-0.331872	0.00313646	1	downregulated
S100a10	-0.332921	7.79723e-11	1.4488e-06	downregulated
Ap2m1	-0.333775	2.28393e-11	4.24377e-07	downregulated
Clic1	-0.335467	8.70452e-13	1.61739e-08	downregulated
Atp5o	-0.336316	1.14297e-14	2.12375e-10	downregulated
Cdca3	-0.337117	3.60312e-05	0.669496	downregulated
Pfdn6	-0.33888	5.37119e-12	9.9802e-08	downregulated
Eno1	-0.339422	2.30347e-15	4.28008e-11	downregulated
Psmb6	-0.340434	2.27173e-16	4.22111e-12	downregulated
Nsmce2	-0.340806	2.32228e-12	4.31502e-08	downregulated
Cenpp	-0.341068	5.3906e-09	0.000100163	downregulated
Smc4	-0.343097	2.67274e-07	0.00496621	downregulated
Lbr	-0.343491	1.61722e-09	3.00496e-05	downregulated
Hist1h1a	-0.343817	8.07554e-06	0.150052	downregulated
Pfkp	-0.344015	4.08611e-09	7.5924e-05	downregulated
Hist1h4i	-0.344896	6.1225e-08	0.00113762	downregulated
Espn	-0.345782	7.60351e-15	1.41281e-10	downregulated
Myl6	-0.346039	3.46681e-17	6.44168e-13	downregulated
Hmgb2	-0.346389	1.51375e-08	0.000281269	downregulated
Hist1h2ag	-0.347053	1.07021e-08	0.000198856	downregulated
Spc25	-0.347235	2.02653e-06	0.0376549	downregulated
Ndufb10	-0.347931	4.0294e-14	7.48703e-10	downregulated
Tmod2	-0.348598	1.25184e-11	2.32605e-07	downregulated
Gdpd1	-0.350564	3.52358e-06	0.0654716	downregulated
Clrn1	-0.351817	4.42002e-15	8.21284e-11	downregulated
Dek	-0.352042	8.7543e-13	1.62664e-08	downregulated
Cdkn3	-0.352098	2.92833e-07	0.00544114	downregulated
Knstrn	-0.352385	1.39477e-05	0.259163	downregulated
Hist1h2bj	-0.353601	8.18081e-07	0.0152008	downregulated
Gpm6a	-0.355399	3.90119e-12	7.2488e-08	downregulated
Mxd3	-0.356399	3.31412e-06	0.0615798	downregulated
H1fx	-0.357284	7.31001e-09	0.000135827	downregulated
Ywhaq	-0.357393	8.86143e-23	1.64654e-18	downregulated
Ldhb	-0.357426	2.73226e-11	5.07681e-07	downregulated
Alyref	-0.357953	3.93349e-13	7.30881e-09	downregulated
Junb	-0.360478	1.00726e-05	0.187159	downregulated
Tmsb4x	-0.36896	4.14463e-15	7.70114e-11	downregulated
Nnat	-0.372455	6.81678e-10	1.26663e-05	downregulated
Syt11	-0.372541	4.08503e-14	7.5904e-10	downregulated
Sowaha	-0.375546	8.49907e-12	1.57921e-07	downregulated
Dazap2	-0.376201	2.93767e-13	5.45849e-09	downregulated
Fos	-0.378122	7.83e-11	1.45489e-06	downregulated
Cdkn1c	-0.385021	7.65288e-05	1	downregulated
Prc1	-0.385619	3.5278e-05	0.6555	downregulated
Mest	-0.386532	4.87125e-08	0.000905128	downregulated
Pmp22	-0.387944	1.38901e-10	2.58092e-06	downregulated
Cenpm	-0.388761	3.18908e-10	5.92562e-06	downregulated
Cd47	-0.3894	2.94157e-12	5.46573e-08	downregulated
Ybx1	-0.393455	2.12424e-31	3.94705e-27	downregulated
Sapcd2	-0.39435	3.90301e-07	0.00725219	downregulated
H2afv	-0.39622	6.74986e-17	1.25419e-12	downregulated
Id1	-0.39764	5.29757e-08	0.000984342	downregulated
Pbk	-0.406441	1.2644e-06	0.0234939	downregulated
Cst3	-0.407277	1.79607e-15	3.33728e-11	downregulated
Cks2	-0.409931	5.69842e-05	1	downregulated
Hist1h2bc	-0.413914	1.89146e-08	0.000351453	downregulated
Hkdc1	-0.426368	7.28374e-12	1.35339e-07	downregulated
Pgk1	-0.427709	2.07948e-15	3.86388e-11	downregulated
Ube2c	-0.429253	0.0230235	1	downregulated
Fxyd1	-0.432634	4.90197e-11	9.10836e-07	downregulated
H3f3b	-0.43289	2.03728e-26	3.78547e-22	downregulated
Ube2s	-0.435267	1.34281e-10	2.49508e-06	downregulated
Vim	-0.44255	5.18832e-16	9.64041e-12	downregulated
Hist3h2a	-0.444351	9.8255e-17	1.82568e-12	downregulated
Nusap1	-0.44719	3.15864e-06	0.0586906	downregulated
Hmgn2	-0.449873	1.16688e-18	2.16818e-14	downregulated
Ccnb2	-0.454331	2.78919e-06	0.051826	downregulated
Hes5	-0.464992	4.07505e-07	0.00757186	downregulated
Hdgf	-0.469675	2.05034e-14	3.80973e-10	downregulated
Calm1	-0.498419	1.21052e-34	2.24927e-30	downregulated
Cdc20	-0.49896	4.4046e-05	0.818418	downregulated
Stmn1	-0.511468	3.29766e-29	6.12738e-25	downregulated
Racgap1	-0.532449	1.49157e-11	2.77149e-07	downregulated
Dpysl4	-0.552817	5.7866e-22	1.07521e-17	downregulated
Ccna2	-0.561324	8.25894e-10	1.53459e-05	downregulated
Cdca8	-0.565442	5.47819e-11	1.0179e-06	downregulated
Gstm5	-0.569602	3.79109e-24	7.04422e-20	downregulated
Dapl1	-0.584628	5.1106e-17	9.496e-13	downregulated
Rlbp1	-0.623054	5.00822e-20	9.30578e-16	downregulated
Ptn	-0.625656	9.11561e-25	1.69377e-20	downregulated
Ddah2	-0.679532	1.34749e-33	2.50377e-29	downregulated
Cd9	-0.692548	6.56422e-29	1.2197e-24	downregulated
Crym	-0.703349	7.03497e-30	1.30717e-25	downregulated
Rbmx	-0.705848	5.02466e-35	9.33631e-31	downregulated
Ass1	-0.804933	3.21952e-32	5.98218e-28	downregulated
Dbi	-0.832257	1.52812e-55	2.83939e-51	downregulated
Tagln2	-0.883379	7.64189e-35	1.41994e-30	downregulated
H2afx	-1.04581	7.94728e-15	1.47668e-10	downregulated
