# Supplementary material for: m6A epitranscriptomic modification regulates neural progenitor-to-glial cell transition in the retina
Source: eLife. 2022 Dec 2;11:e79994. doi: 10.7554/eLife.79994 (PMC9718531; doi:10.7554/eLife.79994)
Supplement: Source data 2. [file elife-79994-data2.xlsx]

## Sheet: Sheet1
Gene	avg_logFC	p_val	p_val_adj	up_down
Cdkn1a	1.47341	1.9623e-67	3.64615e-63	upregulated
Xist	1.18006	1.77996e-38	3.30734e-34	upregulated
Zfp292	1.09419	2.49048e-85	4.62756e-81	upregulated
Serpine2	1.08721	3.23348e-21	6.00813e-17	upregulated
Ckap4	0.939342	5.17231e-81	9.61067e-77	upregulated
Tnrc6c	0.806975	8.58909e-63	1.59594e-58	upregulated
Phlda3	0.792857	2.2764e-41	4.22978e-37	upregulated
Ash1l	0.711898	6.59046e-52	1.22457e-47	upregulated
BC005561	0.68342	4.02876e-40	7.48583e-36	upregulated
Ddit4l	0.667043	5.22976e-28	9.71741e-24	upregulated
Mrpl43	0.63558	1.37225e-49	2.54979e-45	upregulated
Basp1	0.63355	6.76631e-51	1.25725e-46	upregulated
Ephb2	0.578219	6.2321e-36	1.15799e-31	upregulated
Kcnq1ot1	0.57663	5.36543e-10	9.9695e-06	upregulated
Tsix	0.574852	3.89986e-33	7.24633e-29	upregulated
Mex3a	0.572422	8.97161e-32	1.66701e-27	upregulated
Rplp1	0.566731	4.19512e-78	7.79495e-74	upregulated
RF01962	0.560305	2.09902e-27	3.90018e-23	upregulated
Gm42047	0.546237	4.38945e-12	8.15604e-08	upregulated
Map1b	0.540756	4.48821e-27	8.33954e-23	upregulated
Rbmxl1	0.526746	8.50366e-30	1.58007e-25	upregulated
Ptp4a3	0.520424	1.23087e-14	2.28708e-10	upregulated
Son	0.514968	3.28149e-56	6.09733e-52	upregulated
Nxt1	0.514734	2.09248e-31	3.88803e-27	upregulated
Imp3	0.511845	4.5179e-32	8.3947e-28	upregulated
Sacs	0.510402	2.58486e-37	4.80292e-33	upregulated
AW209491	0.507708	9.63714e-32	1.79068e-27	upregulated
Nectin3	0.503034	3.35095e-24	6.2264e-20	upregulated
Cacna1i	0.493743	3.14904e-35	5.85124e-31	upregulated
Phax	0.493635	4.49533e-36	8.35277e-32	upregulated
Sac3d1	0.475739	3.62964e-35	6.74423e-31	upregulated
Efnb1	0.468196	5.63366e-25	1.04679e-20	upregulated
Trim8	0.463075	3.93059e-22	7.30343e-18	upregulated
Snhg20	0.462535	3.39851e-23	6.31477e-19	upregulated
Zfp451	0.46241	4.78199e-21	8.88541e-17	upregulated
Sox11	0.459918	3.24587e-15	6.03116e-11	upregulated
Bax	0.458028	8.66185e-16	1.60946e-11	upregulated
Lcmt2	0.455933	7.52411e-31	1.39806e-26	upregulated
Lsm10	0.455511	1.70091e-33	3.16046e-29	upregulated
Lrrc4b	0.450487	1.1395e-21	2.1173e-17	upregulated
Mrpl14	0.449162	3.13906e-21	5.83269e-17	upregulated
Bcl9l	0.446104	3.79641e-23	7.05412e-19	upregulated
Anp32b	0.44606	1.09645e-18	2.03731e-14	upregulated
Hnrnpa0	0.44563	8.57384e-40	1.59311e-35	upregulated
Rpp25l	0.441678	3.30418e-27	6.1395e-23	upregulated
Ndnf	0.439595	9.13767e-17	1.69787e-12	upregulated
Ncl	0.434364	2.78679e-30	5.17814e-26	upregulated
Gprc5c	0.427999	4.99897e-26	9.28859e-22	upregulated
Snhg6	0.417412	9.99534e-20	1.85723e-15	upregulated
Zfp704	0.416878	2.63054e-13	4.88781e-09	upregulated
Bmyc	0.41345	3.44735e-27	6.40552e-23	upregulated
Thra	0.410565	2.07691e-20	3.85911e-16	upregulated
Apex1	0.409238	2.15802e-24	4.00983e-20	upregulated
Sulf2	0.409033	1.35014e-16	2.50869e-12	upregulated
Txnl4a	0.408336	9.22096e-22	1.71335e-17	upregulated
Ccng1	0.405483	2.388e-21	4.43714e-17	upregulated
Hpcal1	0.400265	2.22932e-26	4.1423e-22	upregulated
Arhgap5	0.399263	6.39136e-16	1.18758e-11	upregulated
Pop7	0.399219	6.23024e-21	1.15764e-16	upregulated
Aen	0.398819	4.34576e-12	8.07486e-08	upregulated
Prelp	0.393254	1.03862e-15	1.92985e-11	upregulated
Ythdf2	0.392724	5.17793e-20	9.62112e-16	upregulated
Asxl2	0.390109	2.67601e-16	4.97229e-12	upregulated
Bcl7a	0.383698	7.48607e-16	1.39099e-11	upregulated
Rbm15	0.383695	3.03878e-20	5.64635e-16	upregulated
Kbtbd11	0.380048	1.81451e-15	3.37155e-11	upregulated
Traf4	0.37938	2.52355e-15	4.68901e-11	upregulated
Fam122a	0.378669	3.07696e-22	5.71729e-18	upregulated
Tpgs1	0.378582	2.50623e-17	4.65682e-13	upregulated
Zmat3	0.376553	2.28682e-13	4.24914e-09	upregulated
3222401L13Rik	0.375113	6.2725e-19	1.16549e-14	upregulated
Ptch1	0.374225	4.99113e-13	9.27403e-09	upregulated
Nsd1	0.374156	2.02181e-18	3.75673e-14	upregulated
Luzp1	0.373952	1.86741e-20	3.46983e-16	upregulated
Rest	0.373321	8.2861e-16	1.53964e-11	upregulated
Cdc34	0.36473	4.41506e-17	8.20362e-13	upregulated
Ankrd12	0.363891	2.71282e-10	5.04069e-06	upregulated
Tst	0.360328	1.54731e-28	2.87505e-24	upregulated
Fam171a2	0.358651	1.61208e-18	2.99541e-14	upregulated
Mmp2	0.358384	4.73953e-28	8.80653e-24	upregulated
Clu	0.354322	5.27611e-20	9.80354e-16	upregulated
Lcorl	0.35112	5.12736e-14	9.52715e-10	upregulated
Socs3	0.35094	5.63483e-06	0.104701	upregulated
Timm8a1	0.350688	2.45539e-19	4.56235e-15	upregulated
Polr1d	0.349813	7.20889e-20	1.33948e-15	upregulated
Tmem132a	0.34757	2.29445e-21	4.26331e-17	upregulated
Rps12	0.34724	6.75193e-40	1.25458e-35	upregulated
Svbp	0.344867	1.08086e-19	2.00835e-15	upregulated
Cenpb	0.343795	8.72245e-15	1.62072e-10	upregulated
Rpl41	0.343122	4.85289e-43	9.01715e-39	upregulated
Rlf	0.341395	2.86593e-17	5.32519e-13	upregulated
Emc6	0.340861	1.01918e-17	1.89374e-13	upregulated
Mrps34	0.34004	7.84297e-17	1.4573e-12	upregulated
Kcnh2	0.338058	4.52788e-21	8.41325e-17	upregulated
Nenf	0.33776	6.00676e-16	1.11612e-11	upregulated
Ahdc1	0.337405	6.69968e-19	1.24487e-14	upregulated
2610037D02Rik	0.337394	4.63566e-16	8.61352e-12	upregulated
Rimklb	0.337385	2.25917e-25	4.19777e-21	upregulated
2810474O19Rik	0.336977	3.94145e-14	7.3236e-10	upregulated
Emilin1	0.336524	6.00924e-16	1.11658e-11	upregulated
Mdk	0.334253	4.80316e-14	8.92474e-10	upregulated
Wdr6	0.333794	6.22006e-12	1.15575e-07	upregulated
Ctxn1	0.332661	2.0359e-15	3.78291e-11	upregulated
Ndufaf4	0.332456	1.74399e-14	3.24051e-10	upregulated
Rap2b	0.332352	4.02967e-12	7.48753e-08	upregulated
Eef1a1	0.331458	2.39821e-56	4.45612e-52	upregulated
Itpripl1	0.328511	5.46901e-26	1.0162e-21	upregulated
Smad7	0.328325	1.40135e-12	2.60386e-08	upregulated
Dot1l	0.327	1.35898e-16	2.52512e-12	upregulated
Rps29	0.325856	4.11809e-36	7.65182e-32	upregulated
Rps21	0.325719	3.62022e-33	6.72673e-29	upregulated
Msl1	0.325121	8.83831e-13	1.64225e-08	upregulated
Mrpl51	0.324726	3.65181e-15	6.78543e-11	upregulated
Tmem11	0.324055	3.21139e-14	5.96708e-10	upregulated
Rpl39	0.323756	1.01368e-34	1.88352e-30	upregulated
Cox7a2l	0.323631	1.17274e-18	2.17906e-14	upregulated
Lgals1	0.322658	4.67779e-12	8.6918e-08	upregulated
Gdf11	0.322302	7.87964e-18	1.46412e-13	upregulated
Enho	0.322229	4.48696e-10	8.33723e-06	upregulated
Pgp	0.321328	7.92217e-15	1.47202e-10	upregulated
Gm10600	0.32114	1.05948e-10	1.96862e-06	upregulated
Rai1	0.319937	2.57209e-17	4.77921e-13	upregulated
Dmac1	0.319455	6.33235e-15	1.17661e-10	upregulated
Enah	0.318199	2.17269e-11	4.03707e-07	upregulated
Mir124-2hg	0.317895	7.8014e-12	1.44958e-07	upregulated
Fam208a	0.316903	1.34593e-11	2.50088e-07	upregulated
Hsp90ab1	0.316602	3.31603e-34	6.16151e-30	upregulated
Gpatch8	0.314795	5.6404e-16	1.04804e-11	upregulated
Pgpep1	0.314781	9.63573e-13	1.79042e-08	upregulated
Psmd7	0.314652	3.82753e-14	7.11194e-10	upregulated
Adgrb2	0.314461	4.12846e-21	7.67109e-17	upregulated
D10Wsu102e	0.314416	6.04853e-11	1.12388e-06	upregulated
Hyal2	0.313933	6.56244e-18	1.21937e-13	upregulated
Sfxn1	0.313388	1.80708e-11	3.35773e-07	upregulated
Wdr66	0.3122	5.27959e-09	9.81001e-05	upregulated
Ankrd40	0.311998	1.10711e-13	2.05712e-09	upregulated
Ankrd11	0.311718	3.65403e-10	6.78956e-06	upregulated
Ywhah	0.310813	4.92893e-14	9.15845e-10	upregulated
Fat3	0.309719	1.26281e-14	2.34642e-10	upregulated
Ak1	0.309447	1.60038e-17	2.97366e-13	upregulated
Siva1	0.308687	1.27247e-12	2.36438e-08	upregulated
Tet3	0.308495	7.72989e-10	1.43629e-05	upregulated
Gm20342	0.306619	1.40177e-12	2.60462e-08	upregulated
Mab21l1	0.305808	6.85802e-11	1.27429e-06	upregulated
Eid2	0.305393	4.60846e-12	8.56299e-08	upregulated
Setd1b	0.305091	3.84829e-11	7.15052e-07	upregulated
Id4	0.304718	1.1431e-09	2.124e-05	upregulated
Phospho2	0.304657	1.02117e-09	1.89743e-05	upregulated
Ythdc1	0.303966	6.41117e-11	1.19126e-06	upregulated
Dag1	0.301486	4.27525e-11	7.94384e-07	upregulated
4632415L05Rik	0.301463	1.57612e-11	2.9286e-07	upregulated
Spen	0.300899	1.88208e-11	3.49709e-07	upregulated
Tnrc6b	0.300174	5.15883e-13	9.58562e-09	upregulated
Fam69b	0.299185	1.44292e-15	2.68109e-11	upregulated
Ttc28	0.296753	2.29542e-12	4.26511e-08	upregulated
Unc13c	0.296427	5.53233e-09	0.000102796	upregulated
Irx5	0.295622	1.32895e-14	2.46932e-10	upregulated
Gjc1	0.294285	6.37227e-13	1.18403e-08	upregulated
4732440D04Rik	0.293838	9.50093e-16	1.76537e-11	upregulated
Gm37494	0.292291	3.75705e-11	6.98098e-07	upregulated
Auts2	0.292065	8.71764e-11	1.61982e-06	upregulated
Lrrn2	0.292008	2.35203e-20	4.3703e-16	upregulated
Lrrc4c	0.291576	1.47157e-12	2.73433e-08	upregulated
Nck1	0.291534	1.31529e-12	2.44393e-08	upregulated
Foxo3	0.291461	1.28406e-09	2.38591e-05	upregulated
Zbtb1	0.291329	5.16577e-10	9.59852e-06	upregulated
Topors	0.290495	7.56199e-13	1.40509e-08	upregulated
Psrc1	0.289543	9.10769e-21	1.6923e-16	upregulated
Mgst1	0.289478	4.97647e-11	9.24679e-07	upregulated
Faap100	0.287501	3.94773e-15	7.33528e-11	upregulated
Bcl9	0.285417	1.0634e-10	1.9759e-06	upregulated
Zkscan1	0.285185	1.07195e-10	1.9918e-06	upregulated
Coa7	0.285014	6.37517e-15	1.18457e-10	upregulated
Scand1	0.284636	5.62963e-13	1.04604e-08	upregulated
Chd3	0.283805	1.11293e-14	2.06793e-10	upregulated
Utp14b	0.28326	1.2705e-06	0.0236072	upregulated
Uqcc3	0.282728	3.80493e-11	7.06994e-07	upregulated
Synm	0.281389	1.05669e-08	0.000196343	upregulated
Dynll1	0.28069	1.58353e-06	0.0294235	upregulated
Ppat.1	0.280586	5.56338e-11	1.03373e-06	upregulated
Eef2	0.280471	2.2232e-19	4.13093e-15	upregulated
Cdh11	0.280066	1.3506e-10	2.50955e-06	upregulated
Mn1	0.278926	1.56247e-14	2.90323e-10	upregulated
Tigd2	0.278914	2.28151e-11	4.23928e-07	upregulated
Tox3	0.2789	1.45383e-11	2.70137e-07	upregulated
Gfod2	0.278462	2.48939e-15	4.62553e-11	upregulated
Meis1	0.278046	9.31132e-09	0.000173014	upregulated
Arf6	0.277991	1.10817e-13	2.05909e-09	upregulated
Sap30bp	0.277793	1.87673e-11	3.48714e-07	upregulated
Ccnjl	0.277111	1.1314e-10	2.10226e-06	upregulated
Zbtb12	0.274735	1.14428e-14	2.12619e-10	upregulated
Zfp467	0.274731	9.18421e-11	1.70652e-06	upregulated
Smim15	0.274278	3.95334e-11	7.34569e-07	upregulated
Knop1	0.272093	2.83622e-11	5.26999e-07	upregulated
Fat1	0.271836	3.25238e-11	6.04324e-07	upregulated
Tnrc6a	0.271808	6.44229e-06	0.119704	upregulated
Eif3a	0.270179	1.11749e-08	0.00020764	upregulated
Tcf20	0.270102	1.77352e-12	3.29538e-08	upregulated
Mrpl46	0.269539	7.1976e-08	0.00133739	upregulated
Nudcd2	0.269308	1.44102e-09	2.67756e-05	upregulated
Casp8ap2	0.268275	3.99656e-09	7.42601e-05	upregulated
Plekha1	0.266975	1.72833e-08	0.000321141	upregulated
Pygo1	0.266491	9.65544e-17	1.79408e-12	upregulated
Pja1	0.266452	6.85052e-08	0.0012729	upregulated
Map1a	0.265568	3.34303e-09	6.21169e-05	upregulated
Greb1	0.26543	1.13119e-09	2.10186e-05	upregulated
Med7	0.265243	3.35222e-10	6.22876e-06	upregulated
Zfp644	0.263666	6.65912e-09	0.000123733	upregulated
Klhl9	0.263154	7.66583e-10	1.42439e-05	upregulated
Cntfr	0.26268	2.54093e-10	4.72131e-06	upregulated
Rbm4b	0.262154	1.92499e-10	3.57683e-06	upregulated
Spr	0.261246	1.0598e-10	1.96922e-06	upregulated
Pnn	0.260916	2.50761e-13	4.65938e-09	upregulated
1810058I24Rik	0.260909	9.03663e-09	0.00016791	upregulated
Hmox2	0.26034	9.44807e-11	1.75555e-06	upregulated
Kcnk1	0.260231	1.25595e-09	2.33367e-05	upregulated
Fam181b	0.259364	1.35866e-19	2.52452e-15	upregulated
Prr7	0.258751	1.15763e-08	0.000215099	upregulated
Armcx4	0.256965	2.90365e-12	5.39528e-08	upregulated
Dsel	0.256771	7.18553e-12	1.33514e-07	upregulated
Zcchc11	0.256568	1.45587e-09	2.70515e-05	upregulated
Lonrf2	0.256417	7.3378e-10	1.36344e-05	upregulated
Hspd1	0.256231	5.53112e-12	1.02774e-07	upregulated
Adprh	0.255552	8.34317e-10	1.55024e-05	upregulated
Gm42418	0.25501	1.0412e-05	0.193466	upregulated
Lzts2	0.254947	1.20243e-10	2.23423e-06	upregulated
Prpf4b	0.253789	1.4522e-10	2.69833e-06	upregulated
Rps27l	0.253628	1.49056e-07	0.0027696	upregulated
Gm47283	0.253593	3.10399e-07	0.00576753	upregulated
Rps24	0.253589	3.56813e-24	6.62995e-20	upregulated
Mrps7	0.253306	8.53734e-10	1.58632e-05	upregulated
Fzd5	0.252307	2.12199e-08	0.000394287	upregulated
Ppp1r14b	0.25214	8.9522e-11	1.66341e-06	upregulated
Nufip2	0.251462	2.03736e-08	0.000378562	upregulated
Nr2f1	0.250976	8.69247e-08	0.00161515	upregulated
Timm13	0.250628	1.44751e-11	2.68962e-07	upregulated
Six3	0.250138	5.10339e-15	9.4826e-11	upregulated
Foxn3	0.250074	9.28413e-08	0.00172508	upregulated
Pex13	0.250028	6.85711e-09	0.000127412	upregulated
Pdlim1	-0.250119	1.27039e-10	2.36051e-06	downregulated
Cdkn1c	-0.250419	5.81227e-05	1	downregulated
Cdc42	-0.250717	2.51893e-10	4.68042e-06	downregulated
Spint2	-0.250831	2.12901e-07	0.00395592	downregulated
Bloc1s1	-0.251426	8.95901e-10	1.66467e-05	downregulated
Car2	-0.25356	3.08908e-05	0.573981	downregulated
Srebf1	-0.253844	8.88155e-07	0.0165028	downregulated
Dctn3	-0.255815	2.30815e-11	4.28877e-07	downregulated
Atp5j	-0.256637	9.43165e-15	1.7525e-10	downregulated
Tmed2	-0.257144	3.48263e-11	6.47107e-07	downregulated
Ilk	-0.25824	5.32607e-09	9.89638e-05	downregulated
Rhoa	-0.258737	1.02474e-12	1.90406e-08	downregulated
Fam19a1	-0.259165	6.60995e-07	0.0122819	downregulated
Aldh1a1	-0.259233	3.97604e-07	0.00738788	downregulated
Sgip1	-0.261217	7.3223e-08	0.00136056	downregulated
Pak3	-0.261275	3.59985e-07	0.00668889	downregulated
Eif4h	-0.261434	5.60832e-11	1.04208e-06	downregulated
Cntn1	-0.261757	2.52666e-09	4.69479e-05	downregulated
Tmem159	-0.261816	3.92203e-08	0.000728753	downregulated
Nol7	-0.2631	5.40932e-11	1.00511e-06	downregulated
Ndufa11	-0.263161	1.92725e-10	3.58103e-06	downregulated
H3f3a	-0.263212	2.70612e-34	5.02824e-30	downregulated
Arntl	-0.263277	1.17413e-08	0.000218165	downregulated
Mmd2	-0.264875	4.58436e-13	8.5182e-09	downregulated
Smdt1	-0.265542	1.17618e-12	2.18546e-08	downregulated
Gapdh	-0.265809	3.42398e-22	6.36209e-18	downregulated
Atp5f1	-0.266061	7.63436e-16	1.41854e-11	downregulated
Tkt	-0.266444	2.11128e-09	3.92297e-05	downregulated
Psmd6	-0.266774	5.41855e-12	1.00682e-07	downregulated
Sf3b6	-0.267161	5.63457e-13	1.04696e-08	downregulated
Tubb2b	-0.267183	3.78612e-08	0.000703499	downregulated
Rgcc	-0.267931	4.54248e-12	8.44039e-08	downregulated
Lsamp	-0.268302	9.4877e-08	0.00176291	downregulated
Bzw2	-0.268609	3.18559e-09	5.91914e-05	downregulated
Slc6a1	-0.268872	1.60416e-07	0.0029807	downregulated
Fjx1	-0.270404	6.39668e-05	1	downregulated
Hnrnpdl	-0.2711	9.52061e-13	1.76902e-08	downregulated
Myl6	-0.27125	3.35326e-17	6.23069e-13	downregulated
Gpm6b	-0.272617	2.94001e-15	5.46284e-11	downregulated
Acyp1	-0.274562	2.1536e-11	4.00161e-07	downregulated
Pcdh15	-0.274766	7.59515e-11	1.41125e-06	downregulated
Crot	-0.274773	3.45901e-07	0.00642718	downregulated
Cdkn1b	-0.27579	3.36641e-08	0.000625513	downregulated
Spcs2	-0.275821	2.03562e-12	3.78239e-08	downregulated
Ppp1ca	-0.275927	4.1367e-13	7.6864e-09	downregulated
Mgarp	-0.276465	1.04809e-14	1.94746e-10	downregulated
Chmp2a	-0.277471	5.2982e-13	9.84459e-09	downregulated
Col9a1	-0.277598	1.16502e-06	0.0216473	downregulated
Bnip3l	-0.27815	2.29875e-13	4.2713e-09	downregulated
Arl6ip1	-0.278225	4.92783e-10	9.1564e-06	downregulated
Tspan15	-0.27919	2.7702e-14	5.14731e-10	downregulated
Gpm6a	-0.279245	1.19787e-13	2.22576e-09	downregulated
Tpd52	-0.279938	2.37657e-11	4.4159e-07	downregulated
Ywhae	-0.280746	6.46922e-19	1.20205e-14	downregulated
Hist1h1c	-0.282931	0.00493791	1	downregulated
Tspan13	-0.283131	1.97726e-11	3.67394e-07	downregulated
1700003F12Rik	-0.283295	1.20628e-06	0.0224139	downregulated
Ddr1	-0.284653	1.26318e-11	2.34711e-07	downregulated
Miat	-0.284711	5.09483e-05	0.946671	downregulated
Ssr4	-0.284902	8.84857e-13	1.64415e-08	downregulated
Ube2d3	-0.286033	7.99529e-15	1.4856e-10	downregulated
Rgs16	-0.286466	8.24016e-06	0.15311	downregulated
Psmd13	-0.287513	7.50336e-12	1.3942e-07	downregulated
Tax1bp1	-0.287817	1.9528e-09	3.6285e-05	downregulated
Dynlrb1	-0.289587	6.4675e-12	1.20173e-07	downregulated
Gm13889	-0.290942	2.22716e-06	0.0413829	downregulated
Selenos	-0.291723	2.31816e-14	4.30737e-10	downregulated
Neurog2	-0.292999	0.0408222	1	downregulated
Rab2a	-0.293911	1.27435e-10	2.36788e-06	downregulated
Eif3c	-0.294192	6.99795e-13	1.30029e-08	downregulated
Josd2	-0.295002	5.03402e-12	9.35371e-08	downregulated
Cdon	-0.295385	2.07325e-09	3.8523e-05	downregulated
Ndufv2	-0.297467	6.26903e-13	1.16485e-08	downregulated
Cd47	-0.298873	1.96403e-10	3.64937e-06	downregulated
Psma2	-0.299181	8.04694e-15	1.4952e-10	downregulated
Csrp2	-0.299346	4.02778e-12	7.48402e-08	downregulated
Uchl1	-0.301732	1.40266e-10	2.60629e-06	downregulated
Ndufc2	-0.302007	6.63453e-17	1.23276e-12	downregulated
Gm9945	-0.30355	1.53955e-11	2.86064e-07	downregulated
Cct4	-0.304087	2.18722e-13	4.06407e-09	downregulated
Ctnnbl1	-0.304929	2.78518e-13	5.17514e-09	downregulated
Cwc15	-0.305133	2.13576e-11	3.96845e-07	downregulated
Kit	-0.305971	4.13209e-09	7.67783e-05	downregulated
Tpi1	-0.306511	1.11955e-13	2.08023e-09	downregulated
Dazap2	-0.30683	4.24068e-13	7.8796e-09	downregulated
Ndufb10	-0.307163	1.48048e-15	2.75089e-11	downregulated
Rbm42	-0.308134	8.18945e-13	1.52168e-08	downregulated
Rabac1	-0.308601	7.28835e-13	1.35425e-08	downregulated
H2afv	-0.309206	3.18733e-10	5.92238e-06	downregulated
Ptov1	-0.309244	2.6407e-16	4.90669e-12	downregulated
Eif2s3y	-0.309927	6.53913e-12	1.21504e-07	downregulated
Espn	-0.313323	1.43285e-19	2.66237e-15	downregulated
Ap2m1	-0.314171	2.55101e-14	4.74003e-10	downregulated
Fos	-0.315459	3.015e-18	5.60217e-14	downregulated
Smim20	-0.315598	5.87745e-15	1.09209e-10	downregulated
Btf3	-0.316535	7.94158e-29	1.47562e-24	downregulated
E2f1	-0.319975	4.18122e-09	7.76913e-05	downregulated
Bsg	-0.320752	6.13675e-20	1.14027e-15	downregulated
Ybx1	-0.320821	1.268e-22	2.35607e-18	downregulated
Ckb	-0.321585	7.83198e-43	1.45526e-38	downregulated
Hist3h2a	-0.321641	3.09553e-15	5.7518e-11	downregulated
Psmc4	-0.324458	2.63595e-13	4.89787e-09	downregulated
Pmp22	-0.325152	6.43928e-11	1.19648e-06	downregulated
Ywhaq	-0.325768	1.33693e-25	2.48415e-21	downregulated
Tmod2	-0.327092	1.09637e-11	2.03717e-07	downregulated
Rcn3	-0.328668	1.84551e-13	3.42914e-09	downregulated
Taldo1	-0.33125	4.79006e-16	8.90041e-12	downregulated
Cope	-0.331474	7.60661e-15	1.41338e-10	downregulated
Id3	-0.331656	5.21131e-06	0.0968314	downregulated
Ddah2	-0.33192	3.71737e-17	6.90725e-13	downregulated
Dpysl3	-0.333388	1.14632e-14	2.12998e-10	downregulated
Syt11	-0.334492	1.5575e-16	2.89399e-12	downregulated
Hkdc1	-0.335493	1.22349e-12	2.27337e-08	downregulated
Cox4i2	-0.337948	3.12563e-09	5.80773e-05	downregulated
Tagln2	-0.338907	8.24116e-13	1.53129e-08	downregulated
Mapt	-0.341441	6.34344e-11	1.17867e-06	downregulated
Kcnh7	-0.345018	7.18721e-11	1.33546e-06	downregulated
Sat1	-0.346249	6.50442e-10	1.20859e-05	downregulated
Tuba1a	-0.34692	3.38594e-28	6.29142e-24	downregulated
Peg3	-0.348603	3.6648e-13	6.80956e-09	downregulated
Hdgf	-0.350329	2.3661e-10	4.39644e-06	downregulated
Acp1	-0.354048	5.49903e-19	1.02178e-14	downregulated
Asph	-0.357134	1.05603e-14	1.96221e-10	downregulated
Ezr	-0.358964	4.03586e-13	7.49903e-09	downregulated
Ldha	-0.361524	1.41918e-15	2.63698e-11	downregulated
Vim	-0.361601	7.13848e-17	1.3264e-12	downregulated
H1fx	-0.363317	6.80336e-05	1	downregulated
Tmsb10	-0.372869	1.53245e-23	2.84744e-19	downregulated
Wipi1	-0.375113	1.30975e-12	2.43365e-08	downregulated
Enpp2	-0.377533	1.6759e-14	3.11398e-10	downregulated
Ppp3ca	-0.377557	2.00196e-26	3.71983e-22	downregulated
Ppp1r17	-0.379852	5.72145e-15	1.0631e-10	downregulated
S100a10	-0.380802	8.31702e-16	1.54538e-11	downregulated
Nrarp	-0.382092	1.76479e-14	3.27915e-10	downregulated
Plekhb1	-0.382874	9.34528e-18	1.73645e-13	downregulated
Psmd8	-0.394848	1.25609e-22	2.33393e-18	downregulated
44443	-0.397175	1.353e-14	2.51401e-10	downregulated
Acsl3	-0.398016	2.12915e-25	3.95618e-21	downregulated
Dusp1	-0.401014	2.86793e-06	0.0532891	downregulated
Mrpl23	-0.403206	1.56177e-19	2.90192e-15	downregulated
Hmx1	-0.404576	7.71048e-15	1.43268e-10	downregulated
H3f3b	-0.406556	4.2063e-48	7.81572e-44	downregulated
Mir9-3hg	-0.408438	7.34998e-17	1.3657e-12	downregulated
Cyp2j6	-0.409099	2.84997e-16	5.29552e-12	downregulated
Hes5	-0.413065	1.34262e-12	2.49473e-08	downregulated
Pgk1	-0.413301	2.86004e-24	5.31424e-20	downregulated
1300002E11Rik	-0.423436	5.14588e-22	9.56156e-18	downregulated
Ddah1	-0.434211	3.39558e-20	6.30932e-16	downregulated
Ptgds	-0.435626	1.2973e-20	2.41051e-16	downregulated
Gm45768	-0.442224	2.03041e-23	3.7727e-19	downregulated
Calm1	-0.446329	4.68661e-32	8.70819e-28	downregulated
Ttyh1	-0.452271	1.18788e-27	2.2072e-23	downregulated
Junb	-0.462485	2.59307e-12	4.81819e-08	downregulated
Pdpn	-0.462579	1.24653e-20	2.31618e-16	downregulated
Eno1	-0.468688	1.3533e-35	2.51457e-31	downregulated
Id1	-0.473892	4.94721e-10	9.19242e-06	downregulated
Dkk3	-0.479868	2.10167e-28	3.90511e-24	downregulated
Phlda1	-0.503132	1.32419e-16	2.46048e-12	downregulated
Ldhb	-0.504415	8.7154e-30	1.61941e-25	downregulated
Ier2	-0.518754	2.5896e-24	4.81174e-20	downregulated
Sowaha	-0.552292	7.16431e-26	1.3312e-21	downregulated
Dapl1	-0.556358	3.73696e-20	6.94364e-16	downregulated
Rbmx	-0.568562	1.68236e-35	3.12599e-31	downregulated
Gadd45g	-0.582178	0.000791003	1	downregulated
Dbi	-0.590552	2.9857e-47	5.54773e-43	downregulated
Clrn1	-0.60053	5.3796e-31	9.99584e-27	downregulated
Pfkp	-0.620717	3.52967e-28	6.55848e-24	downregulated
Fxyd1	-0.627202	1.65599e-28	3.077e-24	downregulated
Mfge8	-0.642626	7.2738e-35	1.35154e-30	downregulated
E130218I03Rik	-0.655982	9.49155e-29	1.76363e-24	downregulated
Mest	-0.678441	2.63422e-25	4.89465e-21	downregulated
Aldoa	-0.683236	2.09464e-39	3.89206e-35	downregulated
Gstm5	-0.683572	6.91121e-53	1.28417e-48	downregulated
Cd9	-0.712039	1.10933e-44	2.06125e-40	downregulated
Npy	-0.720743	7.84192e-18	1.45711e-13	downregulated
Ass1	-0.734774	1.21917e-42	2.26533e-38	downregulated
Nnat	-0.787612	1.31577e-52	2.44483e-48	downregulated
Dpysl4	-0.819696	8.35073e-60	1.55165e-55	downregulated
Rlbp1	-0.927345	2.92925e-60	5.44284e-56	downregulated
Ptn	-0.928183	7.35097e-64	1.36588e-59	downregulated
Crym	-1.14722	4.82934e-71	8.97339e-67	downregulated
