# Supplementary material for: m6A epitranscriptomic modification regulates neural progenitor-to-glial cell transition in the retina
Source: eLife. 2022 Dec 2;11:e79994. doi: 10.7554/eLife.79994 (PMC9718531; doi:10.7554/eLife.79994)
Supplement: Source data 3. [file elife-79994-data3.xlsx]

## Sheet: adult retina
Chromosome	PeakStart	PeakEnd	PeakFoldEnrichment	-LOG10(pvalue)	-LOG10(qvalue)	Gene_ENSEMBL	Gene_Symbol	Gene_Region
16	96467694	96467790	38.3592	422.869	416.537	ENSMUSG00000117081	Igsf5	Intron7
16	96467694	96467790	38.3592	422.869	416.537	ENSMUSG00000090223	Pcp4	UTR5
6	87587109	87587197	31.1837	107.004	101.637	ENSMUSG00000049409	Prokr1	LastIntron
1	11450276	11450364	28.9295	96.8928	91.595	ENSMUSG00000057715	A830018L16Rik	Intron1
4	143120331	143120423	27.8242	165.215	159.9	ENSMUSG00000057637	Prdm2	Intron8
3	144570707	144570800	26.3713	124.431	119.364	ENSMUSG00000037072	Selenof	LastExon
1	121431155	121431243	26.2995	85.3521	80.1399	ENSMUSG00000026339	Ccdc93	UTR5
17	87446791	87446894	22.4701	117.697	112.677	ENSMUSG00000036438	Calm2	Exon1
1	86142312	86142404	21.8908	90.6014	85.8138	ENSMUSG00000094638	Gm21972	Intron2
8	91441404	91441496	21.2336	84.6732	79.9459	ENSMUSG00000055932	Fto	Intron3
9	83423022	83423275	20.0379	137.56	132.4	ENSMUSG00000032258	Lca5	Exon3
9	18412467	18412594	19.1611	55.6508	50.7336	ENSMUSG00000074502	Ubtfl1	UTR3
7	127967485	127967577	18.8448	71.7251	67.136	ENSMUSG00000030795	Fus	UTR5
7	104427993	104428092	18.7854	54.1634	49.263	ENSMUSG00000030921	Trim30a	Intron4
1	46645768	46645856	18.4097	52.6847	47.8056	ENSMUSG00000101337	Dnah7c	Intron33
5	123749288	123749397	17.4987	121.674	116.626	ENSMUSG00000029422	Rsrc2	UTR5
4	132075179	132075293	16.9869	61.9918	57.5261	ENSMUSG00000070717	Gm10300	LastExon
9	75217999	75218622	16.9803	116.48	111.47	ENSMUSG00000034593	Myo5a	UTR3
19	4192142	4192263	16.9495	97.5795	92.726	ENSMUSG00000040385	Ppp1ca	UTR5
17	67741431	67741525	16.9068	46.8593	42.0639	ENSMUSG00000032796	Lama1	Intron5
1	4360197	4360290	16.7215	60.6274	56.1793	ENSMUSG00000025900	Rp1	UTR5
8	78505468	78505564	16.084	73.4115	68.8031	ENSMUSG00000037070	Rbmxl1	UTR3
11	26386977	26387217	16.0695	65.4925	60.9806	ENSMUSG00000004018	Fancl	UTR5
1	59639627	59639874	15.8859	77.6131	72.9582	ENSMUSG00000026021	Sumo1	UTR3
9	59924763	59924954	15.6598	55.2393	50.8666	ENSMUSG00000039585	Myo9a	LastExon
13	3589938	3590106	15.3381	73.7617	69.1493	ENSMUSG00000033799	Fam208b	Exon10
12	86288955	86289086	15.241	57.3857	52.9824	ENSMUSG00000021254	Gpatch2l	LastExon
2	54084522	54084860	14.9991	56.082	51.6977	ENSMUSG00000075334	Rprm	UTR3
5	120947051	120947143	14.8649	101.45	96.5615	ENSMUSG00000029608	Rph3a	Exon18
8	104227035	104227254	14.7487	129.984	124.876	ENSMUSG00000035824	Tk2	UTR3
2	168231753	168232102	14.6855	74.204	69.5864	ENSMUSG00000074576	Mocs3	LastExon
14	52461661	52461753	14.6526	38.4118	33.7587	ENSMUSG00000057564	Olfr1508	UTR3
10	90969788	90969915	14.5981	49.9679	45.6759	ENSMUSG00000058589	Anks1b	UTR3
7	80589642	80589922	14.5981	49.9679	45.6759	ENSMUSG00000030527	Crtc3	UTR3
12	11092246	11092338	14.5981	49.9679	45.6759	ENSMUSG00000043673	Kcns3	LastExon
11	101552863	101552955	14.5981	49.9679	45.6759	ENSMUSG00000017119	Nbr1	Intron1
7	60005034	60005134	14.4515	170.069	164.73	ENSMUSG00000102252	Snrpn	Intron2
7	60005034	60005134	14.4515	170.069	164.73	ENSMUSG00000102627	Snurf	Intergenic
X	136033364	136033487	14.4384	77.2303	72.5793	ENSMUSG00000048355	Arxes1	UTR5
X	160768145	160768237	14.4337	102.044	97.1495	ENSMUSG00000031293	Rs1	UTR5
6	108664636	108664942	14.4128	110.998	106.028	ENSMUSG00000030103	Bhlhe40	LastExon
5	118762959	118763136	14.3822	98.8299	93.9647	ENSMUSG00000018076	Med13l	UTR3
12	74897598	74898331	14.3479	71.7141	67.1256	ENSMUSG00000034402	Kcnh5	LastExon
18	53895753	53895909	14.3172	61.9386	57.4735	ENSMUSG00000073563	Csnk1g3	UTR5
15	10485775	10485914	14.1883	56.4352	52.046	ENSMUSG00000022247	Brix1	Exon1
13	91884227	91884375	14.1733	84.5921	79.8662	ENSMUSG00000021708	Rasgrf2	UTR3
11	21571729	21571821	14.0673	47.3785	43.1282	ENSMUSG00000020321	Mdh1	Exon1
10	9760431	9760924	14.0633	93.8624	89.0422	ENSMUSG00000019790	Stxbp5	UTR3
8	111669651	111669849	14.0143	59.6829	55.2475	ENSMUSG00000055835	Zfp1	LastExon
10	72654859	72654978	13.981	161.779	156.484	ENSMUSG00000019923	Zwint	UTR5
1	172370271	172370646	13.926	61.6544	57.1928	ENSMUSG00000044708	Kcnj10	UTR3
6	86388938	86389230	13.8773	63.7218	59.2335	ENSMUSG00000029998	Pcyox1	LastExon
2	125739656	125739919	13.8209	95.137	90.3052	ENSMUSG00000035093	Secisbp2l	UTR3
19	58860846	58860958	13.7895	49.6701	45.3833	ENSMUSG00000025092	Hspa12a	Exon1
12	111758894	111758997	13.7815	103.802	98.892	ENSMUSG00000021288	Klc1	UTR5
7	15922251	15922343	13.7406	88.217	83.4553	ENSMUSG00000041571	Selenow	Exon1
13	111487458	111487705	13.6727	66.7956	62.2667	ENSMUSG00000116016	Gm49496	Intron1
13	111487458	111487705	13.6727	66.7956	62.2667	ENSMUSG00000032745	Gpbp1	UTR5
4	129628573	129629179	13.6229	79.7535	75.0757	ENSMUSG00000053841	Txlna	LastExon
17	34934925	34935242	13.6078	124.969	119.899	ENSMUSG00000007038	Neu1	LastExon
17	35127173	35127367	13.5364	44.8215	40.6139	ENSMUSG00000043311	D17H6S53E	LastExon
1	127482634	127482885	13.5364	44.8215	40.6139	ENSMUSG00000036155	Mgat5	LastExon
17	56402303	56402566	13.446	92.185	87.3815	ENSMUSG00000024201	Kdm4b	UTR3
2	181837889	181837986	13.344	73.0252	68.4214	ENSMUSG00000027589	Pcmtd2	UTR5
2	117249740	117249840	13.3151	51.4389	47.1238	ENSMUSG00000027349	Fam98b	Exon1
15	6796283	6797134	13.31	51.4264	47.1118	ENSMUSG00000050310	Rictor	UTR3
4	88720224	88720853	13.139	164.081	158.773	ENSMUSG00000070923	Klhl9	LastExon
7	102020188	102020367	13.0747	80.6958	76.0087	ENSMUSG00000070426	Rnf121	UTR3
16	76291209	76291846	13.0488	62.1107	57.6433	ENSMUSG00000048490	Nrip1	LastExon
6	116021504	116021854	13.0274	91.2061	86.412	ENSMUSG00000030126	Tmcc1	UTR3
3	10301123	10301215	13.0056	42.2982	38.1332	ENSMUSG00000027530	Fabp12	UTR5
10	25359874	25359981	12.9643	57.6289	53.2225	ENSMUSG00000019978	Epb41l2	UTR5
11	116539001	116539546	12.9479	176.938	171.564	ENSMUSG00000020802	Ube2o	UTR3
8	120114199	120114317	12.8786	48.9826	44.7073	ENSMUSG00000031824	6430548M08Rik	UTR5
8	120114199	120114317	12.8786	48.9826	44.7073	ENSMUSG00000092329	Gm20388	Intron1
7	97685499	97685960	12.8711	55.2667	50.8938	ENSMUSG00000035623	Rsf1	LastExon
9	44636655	44636857	12.8691	65.1106	60.604	ENSMUSG00000032097	Ddx6	UTR3
12	78350895	78351040	12.8427	435.406	429.04	ENSMUSG00000047454	Gphn	Intron2
7	19004983	19005250	12.8383	142.081	136.892	ENSMUSG00000044030	Irf2bp1	LastExon
16	17528012	17528336	12.8287	60.7677	56.3183	ENSMUSG00000022760	Thap7	UTR3
15	59654384	59654721	12.8287	60.7677	56.3183	ENSMUSG00000032501	Trib1	LastExon
4	152058808	152059004	12.8218	44.6756	40.4709	ENSMUSG00000028948	Nol9	UTR3
12	44598332	44598795	12.7733	69.0303	64.4726	ENSMUSG00000020598	Nrcam	LastExon
11	70669196	70669300	12.7575	68.2763	63.7289	ENSMUSG00000018287	Spag7	Exon1
12	78845222	78845314	12.7402	41.0496	36.9057	ENSMUSG00000021114	Atp6v1d	Exon8
17	32978235	32978580	12.6194	41.4787	37.3274	ENSMUSG00000053600	Zfp472	LastExon
10	80116118	80116862	12.5968	158.731	153.45	ENSMUSG00000003068	Stk11	UTR5
6	29125323	29125455	12.5799	43.4469	39.2629	ENSMUSG00000029701	Rbm28	UTR3
6	71391624	71391916	12.5694	137.539	132.379	ENSMUSG00000002222	Rmnd5a	UTR3
1	30804949	30805526	12.5279	105.158	100.236	ENSMUSG00000048874	Phf3	LastExon
9	58498956	58499690	12.522	70.2886	65.7165	ENSMUSG00000066607	Insyn1	LastExon
7	56230916	56231361	12.5009	116.875	111.861	ENSMUSG00000030451	Herc2	LastExon
11	4986902	4987005	12.4962	77.8457	73.1882	ENSMUSG00000009090	Ap1b1	UTR5
10	20148988	20149080	12.4748	39.8099	35.6891	ENSMUSG00000019996	Map7	UTR5
9	13244098	13244668	12.4535	58.2867	53.8698	ENSMUSG00000079083	Jrkl	LastExon
19	4827115	4827203	12.3984	30.3608	25.872	ENSMUSG00000034108	Ccs	Intron5
4	124856419	124857225	12.398	138.515	133.35	ENSMUSG00000042763	Maneal	UTR3
9	103163786	103163903	12.3287	49.6974	45.4102	ENSMUSG00000032549	Rab6b	Exon6
4	44037023	44037187	12.3223	57.2184	52.8174	ENSMUSG00000028479	Gne	UTR3
8	22482862	22483073	12.3223	57.2184	52.8174	ENSMUSG00000037656	Slc20a2	Intron1
13	55313319	55313709	12.3079	75.7547	71.1193	ENSMUSG00000021488	Nsd1	LastExon
1	167078527	167079410	12.2617	66.6453	62.1181	ENSMUSG00000060568	Fam78b	Exon2
X	135993805	135993952	12.2598	98.2985	93.4383	ENSMUSG00000048040	Arxes2	UTR5
2	83879972	83880580	12.2415	203.651	198.146	ENSMUSG00000048388	Fam171b	LastExon
15	80212040	80212566	12.2413	60.4066	55.9614	ENSMUSG00000042428	Mgat3	LastExon
1	192897107	192897476	12.2237	45.3531	41.1368	ENSMUSG00000016200	Syt14	UTR3
17	78753077	78753212	12.2093	38.5794	34.4811	ENSMUSG00000039414	Heatr5b	LastExon
5	103862879	103863187	12.2093	38.5794	34.4811	ENSMUSG00000029312	Klhl8	UTR3
7	92658552	92658802	12.183	77.3425	72.6905	ENSMUSG00000041328	Pcf11	Exon8
12	98747043	98747158	12.096	41.0143	36.8721	ENSMUSG00000021012	Zc3h14	UTR5
13	60761503	60761732	12.0844	59.2442	54.8147	ENSMUSG00000021559	Dapk1	LastExon
9	57834559	57834946	12.0154	120.964	115.922	ENSMUSG00000004661	Arid3b	Intron1
18	40206059	40206278	11.9847	54.8815	50.5142	ENSMUSG00000024487	Yipf5	UTR3
11	3722098	3722220	11.9603	138.308	133.144	ENSMUSG00000020435	Osbp2	Intron3
8	40992987	40993341	11.9512	55.4595	51.0837	ENSMUSG00000045636	Mtus1	UTR3
3	79459290	79459458	11.9439	37.3581	33.2832	ENSMUSG00000061175	Fnip2	UTR3
4	15981407	15981657	11.9439	37.3581	33.2832	ENSMUSG00000028224	Nbn	Exon11
17	32773645	32774618	11.9439	37.3581	33.2832	ENSMUSG00000024298	Zfp871	UTR3
10	99106685	99107281	11.9274	58.0874	53.6735	ENSMUSG00000019952	Poc1b	Intergenic
4	21848036	21848138	11.8956	115.494	110.491	ENSMUSG00000028248	Pnisr	UTR5
16	32019976	32020135	11.8879	82.9528	78.2431	ENSMUSG00000022781	Pak2	UTR3
18	24677164	24677314	11.875	225.08	219.101	ENSMUSG00000039616	Mocos	Intron7
8	72483357	72483883	11.8625	53.8563	49.5047	ENSMUSG00000019731	Slc35e1	UTR3
3	144189039	144189187	11.826	89.4338	84.659	ENSMUSG00000028266	Lmo4	UTR3
2	51132254	51132482	11.8159	53.7222	49.3721	ENSMUSG00000017144	Rnd3	UTR3
10	7919906	7920504	11.7827	81.8292	77.1302	ENSMUSG00000015755	Tab2	Exon3
5	137784536	137784760	11.7813	120.886	115.844	ENSMUSG00000029726	Mepce	Exon1
18	37655979	37656402	11.6862	49.3561	45.0747	ENSMUSG00000102836	Gm37013	Intron1
18	37655979	37656402	11.6862	49.3561	45.0747	ENSMUSG00000103125	Gm37388	Intron1
18	37655979	37656402	11.6862	49.3561	45.0747	ENSMUSG00000103458	Gm42416	Intron1
17	34645617	34646309	11.6857	43.3901	39.2069	ENSMUSG00000033739	Fkbpl	LastExon
14	57734019	57734313	11.6785	36.1464	32.0955	ENSMUSG00000114942	Gm49361	Exon2
15	76370880	76371105	11.6785	36.1464	32.0955	ENSMUSG00000022554	Hgh1	UTR3
14	57734019	57734313	11.6785	36.1464	32.0955	ENSMUSG00000021959	Lats2	Exon2
7	29776216	29776629	11.6785	36.1464	32.0955	ENSMUSG00000046185	Zfp84	LastExon
10	121265838	121266195	11.6776	42.7101	38.5376	ENSMUSG00000052302	Tbc1d30	UTR3
9	44335616	44336034	11.6135	55.791	51.4107	ENSMUSG00000049932	H2afx	UTR3
9	70678989	70679092	11.6122	38.6161	34.5173	ENSMUSG00000054693	Adam10	UTR5
4	41712054	41712534	11.6122	38.6161	34.5173	ENSMUSG00000036114	Rpp25l	UTR3
14	18206544	18206902	11.6046	51.7836	47.4631	ENSMUSG00000021775	Nr1d2	UTR3
7	144420908	144421141	11.5844	43.1437	38.965	ENSMUSG00000037541	Shank2	LastExon
2	165034682	165034803	11.5376	86.0933	81.3529	ENSMUSG00000039804	Ncoa5	UTR5
1	134506158	134506441	11.5362	65.4941	60.9819	ENSMUSG00000042229	Rabif	LastExon
19	4319049	4319177	11.5333	44.9894	40.7789	ENSMUSG00000054611	Kdm2a	UTR3
2	49549881	49550116	11.4783	51.422	47.1074	ENSMUSG00000069495	Epc2	LastExon
4	70432675	70433466	11.4783	51.422	47.1074	ENSMUSG00000039270	Megf9	UTR3
12	55398828	55398936	11.4783	51.422	47.1074	ENSMUSG00000021024	Psma6	UTR5
12	103404338	103404656	11.4566	54.6514	50.2873	ENSMUSG00000021203	Otub2	LastExon
1	171418036	171418612	11.4414	84.987	80.257	ENSMUSG00000026641	Usf1	LastExon
19	60528796	60529015	11.4131	34.9444	30.9181	ENSMUSG00000033417	Cacul1	UTR3
12	44206926	44207419	11.4131	34.9444	30.9181	ENSMUSG00000014905	Dnajb9	UTR3
12	102753712	102754173	11.4131	34.9444	30.9181	ENSMUSG00000041716	Gm20604	LastIntron
12	102753712	102754173	11.4131	34.9444	30.9181	ENSMUSG00000098530	Gm28051	LastIntron
12	102753712	102754173	11.4131	34.9444	30.9181	ENSMUSG00000091931	Gon7	UTR3
3	54804302	54804469	11.4131	34.9444	30.9181	ENSMUSG00000036615	Rfxap	UTR3
11	77293996	77294214	11.4131	34.9444	30.9181	ENSMUSG00000037926	Ssh2	Intron1
7	25272388	25272632	11.4103	94.7545	89.9264	ENSMUSG00000005442	Cic	Exon2
14	19417263	19417359	11.3909	29.1842	24.7231	ENSMUSG00000095280	Gm21738	Exon3
2	158495479	158495843	11.3819	70.8681	66.2892	ENSMUSG00000027652	Ralgapb	LastExon
16	17483957	17484286	11.3506	40.6218	36.4866	ENSMUSG00000006134	Crkl	UTR3
1	171247010	171247102	11.3506	40.6218	36.4866	ENSMUSG00000013593	Ndufs2	Exon1
3	152428561	152428779	11.3506	40.6218	36.4866	ENSMUSG00000039068	Zzz3	Exon4
7	130910970	130911334	11.3391	130.617	125.505	ENSMUSG00000040268	Plekha1	UTR3
6	117843282	117843384	11.3345	43.8306	39.6402	ENSMUSG00000059689	Zfp637	LastExon
13	45557060	45557452	11.321	47.0515	42.8071	ENSMUSG00000046876	Atxn1	LastExon
19	41830991	41831533	11.2997	53.5177	49.1708	ENSMUSG00000067199	Frat1	UTR3
6	83109696	83109818	11.2989	82.3571	77.6534	ENSMUSG00000079511	Gm42688	UTR3
6	83109696	83109818	11.2989	82.3571	77.6534	ENSMUSG00000030037	Mrpl53	LastExon
15	80929640	80929764	11.2905	42.4216	38.2547	ENSMUSG00000047888	Tnrc6b	UTR3
6	71509654	71510274	11.2677	37.2028	33.1313	ENSMUSG00000052656	Rnf103	UTR3
8	13879532	13879829	11.2658	69.758	65.1919	ENSMUSG00000047710	Champ1	LastExon
10	42186045	42186279	11.2658	69.758	65.1919	ENSMUSG00000048756	Foxo3	UTR3
4	133662384	133662731	11.2502	36.5221	32.4636	ENSMUSG00000043257	Pigv	UTR3
11	116338214	116338647	11.208	132.958	127.829	ENSMUSG00000052949	Rnf157	UTR3
10	111293184	111293507	11.1959	42.1864	38.0241	ENSMUSG00000020189	Osbpl8	LastExon
2	152109400	152109594	11.1872	83.8054	79.0875	ENSMUSG00000032802	Srxn1	UTR3
5	116016684	116017036	11.1728	77.2159	72.5649	ENSMUSG00000029513	Prkab1	Intron5
2	114010802	114011690	11.1611	156.763	151.493	ENSMUSG00000068615	Gjd2	UTR3
2	181075696	181075850	11.1515	75.1692	70.5407	ENSMUSG00000016346	Kcnq2	UTR3
14	63122479	63122571	11.1477	33.7524	29.7512	ENSMUSG00000021939	Ctsb	UTR5
8	104523160	104523252	11.1477	33.7524	29.7512	ENSMUSG00000031878	Nae1	LastExon
17	32056697	32056901	11.1477	33.7524	29.7512	ENSMUSG00000058392	Rrp1b	Exon13
1	55027338	55027430	11.1477	33.7524	29.7512	ENSMUSG00000025982	Sf3b1	Exon1
11	11116056	11116518	11.1477	33.7524	29.7512	ENSMUSG00000050830	Vwc2	Exon2
9	35565568	35565679	11.1407	49.1471	44.8684	ENSMUSG00000050555	Hyls1	LastExon
9	35565568	35565679	11.1407	49.1471	44.8684	ENSMUSG00000032103	Pus3	Exon3
8	123841041	123841911	11.1384	45.9095	41.6838	ENSMUSG00000031971	Ccsap	UTR3
8	123841041	123841911	11.1384	45.9095	41.6838	ENSMUSG00000092329	Gm20388	Intron1
13	99415061	99415243	11.1384	45.9095	41.6838	ENSMUSG00000041632	Mrps27	UTR3
2	92360194	92360670	11.1384	45.9095	41.6838	ENSMUSG00000058318	Phf21a	LastExon
19	5081409	5081709	11.1384	45.9095	41.6838	ENSMUSG00000061451	Tmem151a	UTR3
19	46877846	46878261	11.1323	39.4592	35.3455	ENSMUSG00000064105	Cnnm2	LastExon
8	27393714	27393879	11.1198	42.6392	38.4682	ENSMUSG00000031492	Chrnb3	Exon5
5	122382503	122382651	11.0463	74.0732	69.4571	ENSMUSG00000029464	Gpn3	UTR3
11	97351310	97351815	11.0402	70.8117	66.2338	ENSMUSG00000070337	Gpr179	Exon1
4	8866379	8866732	11.0391	125.232	120.159	ENSMUSG00000041235	Chd7	LastExon
14	49172909	49173304	11.0335	67.5509	63.013	ENSMUSG00000036282	Naa30	Exon1
19	58797155	58797582	11.0283	166.626	161.304	ENSMUSG00000025092	Hspa12a	UTR3
9	105412781	105412902	11.028	36.0312	31.9833	ENSMUSG00000032570	Atp2c1	UTR3
11	78750519	78751009	11.0177	61.0327	56.5792	ENSMUSG00000049489	Fam58b	UTR3
10	99109904	99110529	10.9958	59.666	55.2307	ENSMUSG00000090035	Galnt4	LastExon
10	99109904	99110529	10.9958	59.666	55.2307	ENSMUSG00000019952	Poc1b	Intron1
4	43176946	43177501	10.9634	149.23	144.002	ENSMUSG00000028456	Unc13b	Exon10
12	15793416	15794038	10.9198	179.778	174.39	ENSMUSG00000020601	Trib2	UTR3
10	94586910	94587234	10.914	38.3051	34.2125	ENSMUSG00000020023	Tmcc3	LastExon
7	41648448	41648642	10.914	38.3051	34.2125	ENSMUSG00000074165	Zfp788	LastExon
1	170390088	170390504	10.8955	25.2479	20.8907	ENSMUSG00000038473	Nos1ap	LastIntron
14	59629881	59630316	10.8864	35.0862	31.0566	ENSMUSG00000044461	Shisa2	LastExon
18	84013019	84013292	10.8864	35.0862	31.0566	ENSMUSG00000046982	Tshz1	UTR3
2	125579528	125579917	10.8822	32.5705	28.5947	ENSMUSG00000068394	Cep152	Exon21
10	41490225	41490342	10.8708	56.6693	52.2763	ENSMUSG00000019822	Smpd2	Exon1
8	14896718	14897014	10.8512	53.4102	49.065	ENSMUSG00000026317	Cln8	LastExon
6	127087838	127088107	10.8512	53.4102	49.065	ENSMUSG00000038028	Tigar	UTR3
1	127803370	127803546	10.8394	93.6858	88.8675	ENSMUSG00000026349	Ccnt2	LastExon
8	13792075	13792167	10.8031	46.8982	42.6563	ENSMUSG00000038398	Upf3a	LastExon
11	51580087	51580975	10.78	79.952	75.2722	ENSMUSG00000063564	Col23a1	UTR3
18	25479387	25479725	10.7792	185.364	179.947	ENSMUSG00000024268	Celf4	UTR3
6	126737385	126737883	10.7732	43.6468	39.4591	ENSMUSG00000038077	Kcna6	UTR3
10	80834562	80834854	10.7684	77.3461	72.694	ENSMUSG00000051067	Lingo3	LastExon
6	100866425	100866561	10.7392	119.905	114.87	ENSMUSG00000052144	Ppp4r2	LastExon
10	110944187	110944518	10.7392	119.905	114.87	ENSMUSG00000035798	Zdhhc17	LastExon
6	47796343	47796921	10.7307	70.8102	66.2323	ENSMUSG00000025823	Pdia4	UTR3
2	180775867	180776033	10.7252	64.4303	59.9325	ENSMUSG00000045493	Bhlhe23	UTR3
3	88965974	88966301	10.6994	56.0878	51.7034	ENSMUSG00000028053	Ash1l	Exon2
10	11164544	11164665	10.6958	37.1595	33.089	ENSMUSG00000090112	Shprh	Exon9
12	105381395	105381929	10.6958	37.1595	33.089	ENSMUSG00000097929	Tunar	LastExon
1	9724521	9724847	10.6851	64.2746	59.7793	ENSMUSG00000045210	Vcpip1	LastExon
10	43021118	43021348	10.6812	91.5468	86.7493	ENSMUSG00000038248	Sobp	Exon6
12	83734047	83734468	10.6597	40.8287	36.6897	ENSMUSG00000019969	Psen1	LastExon
1	97645519	97646300	10.6565	100.291	95.4121	ENSMUSG00000044768	D1Ertd622e	UTR3
14	20736083	20736618	10.6496	101.518	96.6283	ENSMUSG00000021820	Camk2g	UTR3
X	36611824	36612038	10.6445	33.9283	29.9224	ENSMUSG00000059708	Akap17b	LastExon
9	47530359	47530462	10.6168	31.3991	27.4491	ENSMUSG00000032076	Cadm1	Exon1
7	113513845	113513937	10.6168	31.3991	27.4491	ENSMUSG00000030759	Far1	UTR5
8	70452712	70452921	10.6168	31.3991	27.4491	ENSMUSG00000055707	Klhl26	LastExon
14	103323694	103323787	10.6168	31.3991	27.4491	ENSMUSG00000033004	Mycbp2	Exon2
9	13244958	13245439	10.6134	48.2374	43.9736	ENSMUSG00000079083	Jrkl	LastExon
6	55046424	55046516	10.5986	66.4614	61.9366	ENSMUSG00000029777	Gars	Exon2
1	161818287	161818793	10.5956	54.4728	50.112	ENSMUSG00000040297	Suco	UTR3
11	63889037	63889275	10.5906	42.5263	38.3574	ENSMUSG00000070407	Hs3st3b1	UTR3
10	98968866	98969069	10.5903	123.276	118.217	ENSMUSG00000019943	Atp2b1	UTR5
11	86319711	86320001	10.5684	36.2365	32.1846	ENSMUSG00000034297	Med13	Exon9
2	125831824	125832333	10.5657	95.9613	91.1219	ENSMUSG00000027206	Cops2	UTR3
18	64516448	64516540	10.5579	51.2064	46.8962	ENSMUSG00000024587	Nars	Exon1
8	91122275	91122716	10.5495	71.9266	67.3352	ENSMUSG00000031666	Rbl2	LastExon
6	145863288	145863621	10.5491	125.495	120.42	ENSMUSG00000030256	Bhlhe41	LastExon
17	15368433	15368661	10.5391	39.2721	35.1612	ENSMUSG00000014773	Dll1	Exon9
11	58346045	58346346	10.5229	89.4206	84.6461	ENSMUSG00000013646	Sh3bp5l	LastExon
X	48504631	48504719	10.5198	24.0051	19.6849	ENSMUSG00000036932	Aifm1	Intron2
12	87108991	87109266	10.515	47.9408	43.6819	ENSMUSG00000034126	Pomt2	UTR3
11	96827909	96828189	10.5107	178.048	172.669	ENSMUSG00000038615	Nfe2l1	UTR5
7	5007698	5008060	10.5021	46.6528	42.4149	ENSMUSG00000061374	Fiz1	UTR3
2	130636253	130636564	10.4922	40.3955	36.2646	ENSMUSG00000037703	Lzts3	Exon4
13	21369351	21369597	10.4779	34.1745	30.1641	ENSMUSG00000036721	Zscan12	LastExon
7	98715266	98715600	10.4721	79.1083	74.4374	ENSMUSG00000030753	Thap12	LastExon
12	35144225	35144462	10.4483	31.6574	27.7017	ENSMUSG00000020590	Snx13	LastExon
14	52311632	52312397	10.4096	47.6213	43.3676	ENSMUSG00000049532	Sall2	UTR3
2	151969736	151969951	10.408	41.4132	37.2634	ENSMUSG00000027459	Fam110a	UTR3
1	182316945	182317192	10.408	41.4132	37.2634	ENSMUSG00000047539	Fbxo28	LastExon
2	75676718	75676931	10.408	41.4132	37.2634	ENSMUSG00000015839	Nfe2l2	LastExon
15	103289060	103289152	10.4026	32.7802	28.7993	ENSMUSG00000060992	Copz1	Exon2
2	35979391	35979598	10.3696	55.5705	51.1934	ENSMUSG00000026885	Ttll11	Exon1
16	55905314	55905614	10.3514	30.2384	26.3141	ENSMUSG00000022604	Cep97	LastExon
1	36472663	36473012	10.3514	30.2384	26.3141	ENSMUSG00000037408	Cnnm4	Exon1
10	82739101	82739215	10.3514	30.2384	26.3141	ENSMUSG00000020246	Hcfc2	Exon14
1	192100651	192100859	10.3514	30.2384	26.3141	ENSMUSG00000037395	Rcor3	UTR3
11	36024114	36024258	10.3514	30.2384	26.3141	ENSMUSG00000049336	Tenm2	Exon29
7	12971757	12971967	10.3514	30.2384	26.3141	ENSMUSG00000004500	Zfp324	UTR3
17	33302068	33302199	10.3514	30.2384	26.3141	ENSMUSG00000096910	Zfp955b	LastExon
8	66468306	66468808	10.344	92.7979	87.9881	ENSMUSG00000036469	2020-03-01	LastExon
14	103075811	103076141	10.3402	38.1524	34.0636	ENSMUSG00000022125	Cln5	LastExon
3	89448971	89449088	10.3088	32.5734	28.5974	ENSMUSG00000042613	Pbxip1	UTR3
1	12858875	12859531	10.3016	30.7388	26.8033	ENSMUSG00000016918	Sulf1	UTR3
13	17717955	17718432	10.2967	43.5756	39.3895	ENSMUSG00000041297	Cdk13	UTR3
2	148732311	148732421	10.291	57.7674	53.3588	ENSMUSG00000027438	Napb	Exon1
8	83594378	83594487	10.291	57.7674	53.3588	ENSMUSG00000031708	Tecr	Intergenic
X	74317408	74317698	10.2807	33.7268	29.7269	ENSMUSG00000001962	Fam50a	Intron4
12	83260315	83260616	10.2801	69.4903	64.9271	ENSMUSG00000021221	Dpf3	Intron8
2	160365173	160365631	10.2719	31.8855	27.9253	ENSMUSG00000074622	Mafb	UTR3
5	73020701	73020886	10.2715	120.276	115.239	ENSMUSG00000070733	Fryl	UTR3
4	118236215	118236500	10.2646	49.0265	44.7506	ENSMUSG00000033295	Ptprf	Exon9
8	91133903	91133998	10.2592	34.8947	30.8701	ENSMUSG00000031667	Aktip	LastExon
8	10985163	10985314	10.2592	34.8947	30.8701	ENSMUSG00000038894	Irs2	UTR3
18	37655979	37656402	10.2451	33.0383	29.0522	ENSMUSG00000102836	Gm37013	Intron1
18	37655979	37656402	10.2451	33.0383	29.0522	ENSMUSG00000103125	Gm37388	Intron1
18	37655979	37656402	10.2451	33.0383	29.0522	ENSMUSG00000103458	Gm42416	Intron1
10	123113396	123113687	10.2254	40.3077	36.1782	ENSMUSG00000020124	Usp15	UTR3
10	13008798	13009097	10.2075	104.972	100.051	ENSMUSG00000078348	Sf3b5	LastExon
5	130212868	130213301	10.2053	477.278	470.798	ENSMUSG00000025340	Rabgef1	LastExon
14	65077684	65077858	10.2011	45.7543	41.532	ENSMUSG00000021978	Extl3	Exon3
4	32019575	32019734	10.2011	45.7543	41.532	ENSMUSG00000028284	Map3k7	LastExon
16	13986615	13986835	10.1985	35.3588	31.324	ENSMUSG00000044117	2900011O08Rik	UTR5
5	28394268	28394647	10.1805	76.44	71.7969	ENSMUSG00000048271	Rbm33	Exon15
11	8433824	8434481	10.1685	56.6977	52.3044	ENSMUSG00000020422	Tns3	UTR3
8	70225050	70225204	10.1607	31.642	27.6864	ENSMUSG00000002343	Armc6	Exon4
12	100130950	100131083	10.1607	31.642	27.6864	ENSMUSG00000021179	Nrde2	Exon11
9	108110267	108110449	10.157	62.1829	57.7141	ENSMUSG00000032589	Bsn	Exon5
11	94992551	94992870	10.1449	238.056	232.391	ENSMUSG00000038976	Ppp1r9b	Exon1
3	105668987	105669597	10.1414	37.0409	32.9726	ENSMUSG00000040896	Kcnd3	LastExon
1	80267020	80267290	10.1322	60.2426	55.7996	ENSMUSG00000004364	Cul3	UTR3
X	134690285	134690787	10.128	33.9802	29.9731	ENSMUSG00000049804	Armcx4	LastExon
7	120945449	120945740	10.1279	42.482	38.3139	ENSMUSG00000030880	Polr3e	LastExon
11	86298336	86298701	10.1104	53.4229	49.0773	ENSMUSG00000034297	Med13	Exon16
8	13256456	13256852	10.0994	64.3994	59.9021	ENSMUSG00000038506	Dcun1d2	UTR3
14	31667653	31668070	10.086	29.0886	25.1907	ENSMUSG00000021900	Btd	LastExon
6	149044509	149044812	10.086	29.0886	25.1907	ENSMUSG00000030313	Dennd5b	Exon5
13	42154712	42154983	10.086	29.0886	25.1907	ENSMUSG00000021366	Hivep1	Exon4
11	54691454	54691619	10.086	29.0886	25.1907	ENSMUSG00000037533	Rapgef6	Exon26
13	98249090	98249317	10.086	29.0886	25.1907	ENSMUSG00000041747	Utp15	UTR3
11	22972231	22972916	10.0757	47.8109	43.5543	ENSMUSG00000051355	Commd1	Intron1
11	22972231	22972916	10.0757	47.8109	43.5543	ENSMUSG00000098650	Gm28048	Intron1
11	22972231	22972916	10.0757	47.8109	43.5543	ENSMUSG00000044068	Zrsr1	UTR5
1	188211690	188211910	10.0741	34.4563	30.4404	ENSMUSG00000026610	Esrrg	UTR3
1	156006819	156007399	10.054	57.4929	53.0886	ENSMUSG00000026466	Tor1aip1	UTR3
8	106010455	106010776	10.0523	32.6014	28.6251	ENSMUSG00000045538	Ddx28	LastExon
5	105485881	105486312	10.0475	72.1189	67.5254	ENSMUSG00000070639	Lrrc8b	LastExon
1	194812665	194812819	10.0466	61.1249	56.6702	ENSMUSG00000026640	Plxna2	UTR3
9	73930726	73931365	10.0451	50.1474	45.8524	ENSMUSG00000062151	Unc13c	Exon2
8	12757079	12757267	10.0441	44.6709	40.4663	ENSMUSG00000031441	Atp11a	UTR5
11	79692748	79692954	10.0441	44.6709	40.4663	ENSMUSG00000017639	Rab11fip4	LastExon
14	75703552	75703957	10.0409	33.7759	29.7739	ENSMUSG00000034893	Cog3	LastExon
10	79724474	79724655	10.0409	33.7759	29.7739	ENSMUSG00000020331	Hcn2	Exon2
18	86716776	86717191	10.037	33.7667	29.7652	ENSMUSG00000024647	Cbln2	UTR3
8	56591574	56591758	9.99925	68.8457	64.2913	ENSMUSG00000038206	Fbxo8	LastExon
14	37063056	37063383	9.99752	177.925	172.546	ENSMUSG00000041044	Lrit1	UTR3
4	155740808	155740969	9.99425	63.3464	58.8631	ENSMUSG00000029036	Atad3a	UTR3
8	60912878	60913043	9.9917	59.687	55.2514	ENSMUSG00000004319	Clcn3	LastExon
6	56778826	56779112	9.98076	52.3573	48.0283	ENSMUSG00000059486	Kbtbd2	UTR3
14	45595192	45595540	9.94663	65.5721	61.059	ENSMUSG00000037697	Ddhd1	UTR3
14	31067387	31067690	9.94252	35.9378	31.8921	ENSMUSG00000042323	Pbrm1	Exon18
12	83595040	83595247	9.94252	35.9378	31.8921	ENSMUSG00000042628	Zfyve1	UTR5
4	132535547	132535664	9.94133	89.8241	85.0449	ENSMUSG00000054405	Dnajc8	Exon1
9	13244098	13244668	9.93638	45.5522	41.3329	ENSMUSG00000079083	Jrkl	LastExon
5	14696748	14697463	9.9248	267.471	261.669	ENSMUSG00000061601	Pclo	Intron6
3	80845037	80845189	9.92343	54.574	50.2109	ENSMUSG00000028020	Glrb	LastExon
6	28418105	28418858	9.92049	60.0084	55.5685	ENSMUSG00000029708	Gcc1	LastExon
9	105130215	105130371	9.91873	30.514	26.5837	ENSMUSG00000032565	Nudt16	LastExon
11	106073251	106073458	9.91873	30.514	26.5837	ENSMUSG00000001983	Taco1	LastExon
9	57127540	57127667	9.90479	39.4387	35.3254	ENSMUSG00000042557	Sin3a	UTR3
9	101074785	101075296	9.9031	67.8015	63.2599	ENSMUSG00000066415	Msl2	UTR5
19	10502551	10503142	9.8872	43.5943	39.4074	ENSMUSG00000024668	Sdhaf2	UTR3
15	6796283	6797134	9.88445	36.3892	32.3336	ENSMUSG00000050310	Rictor	UTR3
17	14943227	14943319	9.8823	29.8432	25.9282	ENSMUSG00000050088	1600012H06Rik	UTR5
9	63640389	63640551	9.87892	73.1298	68.5245	ENSMUSG00000037257	Aagab	UTR3
6	42318270	42318437	9.8602	38.1196	34.0314	ENSMUSG00000029861	Fam131b	LastExon
X	38631570	38631990	9.843	77.7775	73.1207	ENSMUSG00000048970	C1galt1c1	LastExon
7	62349663	62349922	9.84188	176.12	170.75	ENSMUSG00000033585	Ndn	UTR3
19	10857832	10858563	9.82472	45.803	41.5794	ENSMUSG00000024737	Slc15a3	LastExon
19	10857832	10858563	9.82472	45.803	41.5794	ENSMUSG00000024736	Tmem132a	UTR3
13	78189373	78189763	9.82265	32.6664	28.6883	ENSMUSG00000069171	Nr2f1	UTR3
1	191909532	191909725	9.82265	32.6664	28.6883	ENSMUSG00000037434	Slc30a1	LastExon
9	37208291	37208406	9.82265	32.6664	28.6883	ENSMUSG00000032121	Tmem218	UTR5
11	110095917	110096032	9.82055	27.95	24.0794	ENSMUSG00000041828	Abca8a	UTR5
11	107132033	107132143	9.82055	27.95	24.0794	ENSMUSG00000040481	Bptf	UTR5
7	16218607	16218791	9.82055	27.95	24.0794	ENSMUSG00000006019	Dhx34	Exon2
11	115268032	115268158	9.82055	27.95	24.0794	ENSMUSG00000018861	Fdxr	UTR3
15	77943036	77943255	9.82055	27.95	24.0794	ENSMUSG00000016552	Foxred2	UTR3
17	48388963	48389199	9.82055	27.95	24.0794	ENSMUSG00000023994	Nfya	UTR3
15	84934970	84935184	9.82055	27.95	24.0794	ENSMUSG00000016619	Nup50	Exon5
4	134278447	134279074	9.82055	27.95	24.0794	ENSMUSG00000050890	Pdik1l	LastExon
13	110400240	110400588	9.82055	27.95	24.0794	ENSMUSG00000021701	Plk2	UTR3
17	79052244	79052342	9.82055	27.95	24.0794	ENSMUSG00000024084	Qpct	UTR5
11	70917365	70917651	9.82055	27.95	24.0794	ENSMUSG00000020817	Rabep1	Exon9
9	31053976	31054148	9.82055	27.95	24.0794	ENSMUSG00000047412	Zbtb44	Exon2
5	30506489	30506874	9.80618	36.1885	32.1371	ENSMUSG00000053194	Cib4	Intron3
7	116164077	116164443	9.80618	36.1885	32.1371	ENSMUSG00000045659	Plekha7	Exon7
12	83734047	83734468	9.79622	39.7365	35.6175	ENSMUSG00000019969	Psen1	LastExon
11	121307045	121307454	9.79032	40.3164	36.1867	ENSMUSG00000039275	Foxk2	UTR3
1	16105683	16106066	9.79032	40.3164	36.1867	ENSMUSG00000025921	Rdh10	UTR5
2	138284266	138284484	9.77938	30.7955	26.859	ENSMUSG00000062098	Btbd3	LastExon
11	94213672	94214364	9.77206	132.056	126.935	ENSMUSG00000037573	Tob1	LastExon
9	108207887	108208163	9.77096	34.3191	30.306	ENSMUSG00000039952	Dag1	LastExon
2	18705481	18705569	9.7684	21.5658	17.321	ENSMUSG00000037708	Spag6	Intron2
14	76504506	76504637	9.74579	55.7086	51.3297	ENSMUSG00000022010	Tsc22d1	Intron3
8	102634071	102634596	9.74367	34.8432	30.8194	ENSMUSG00000031673	Cdh11	UTR3
9	75651630	75651722	9.74367	34.8432	30.8194	ENSMUSG00000032181	Scg3	Exon11
4	132225756	132225919	9.73225	31.2768	27.3306	ENSMUSG00000028901	Gmeb1	UTR3
5	107596793	107596895	9.73026	42.5244	38.3556	ENSMUSG00000029276	Glmn	Exon2
16	32471587	32471726	9.73026	42.5244	38.3556	ENSMUSG00000005615	Pcyt1a	UTR3
5	115342908	115343147	9.73026	42.5244	38.3556	ENSMUSG00000029535	Triap1	UTR3
8	60671342	60671923	9.72409	49.059	44.782	ENSMUSG00000031647	Mfap3l	LastExon
18	61587947	61588078	9.70729	73.4771	68.8676	ENSMUSG00000024576	Csnk1a1	UTR3
11	71788873	71789269	9.69296	38.8541	34.7507	ENSMUSG00000020811	Wscd1	LastExon
9	3034960	3035064	9.69007	21.9811	17.7229	ENSMUSG00000096736	Gm17535	Exon2
17	74579233	74579648	9.67809	44.7413	40.5354	ENSMUSG00000024073	Birc6	Exon9
9	106885977	106886124	9.67761	37.0375	32.9695	ENSMUSG00000074102	Rbm15b	LastExon
X	134749772	134750072	9.67681	29.3964	25.4913	ENSMUSG00000050394	Armcx6	LastExon
3	109781439	109781657	9.67681	29.3964	25.4913	ENSMUSG00000059857	Ntng1	UTR3
16	94364639	94364774	9.67681	29.3964	25.4913	ENSMUSG00000022940	Pigp	UTR3
10	128291227	128291585	9.61765	36.2888	32.236	ENSMUSG00000040033	Stat2	LastExon
4	97568515	97568837	9.60497	56.9407	52.5437	ENSMUSG00000048747	E130114P18Rik	UTR3
6	126737385	126737883	9.60437	31.5664	27.6127	ENSMUSG00000038077	Kcna6	UTR3
14	120503714	120503862	9.60437	31.5664	27.6127	ENSMUSG00000051615	Rap2a	LastExon
3	86546339	86546925	9.59925	100.231	95.3526	ENSMUSG00000028080	Lrba	Intron40
3	86546339	86546925	9.59925	100.231	95.3526	ENSMUSG00000057777	Mab21l2	UTR3
17	46773150	46773304	9.5832	28.0336	24.1611	ENSMUSG00000062619	2310039H08Rik	LastExon
7	28268455	28269088	9.57356	112.498	107.517	ENSMUSG00000046058	Eid2	LastExon
4	95049925	95050334	9.57356	112.498	107.517	ENSMUSG00000052684	Jun	UTR3
6	116043103	116043439	9.56628	63.8825	59.3925	ENSMUSG00000030126	Tmcc1	Exon4
17	87991745	87992035	9.56362	86.9552	82.2059	ENSMUSG00000005371	Fbxo11	UTR3
12	78226119	78226520	9.56362	86.9552	82.2059	ENSMUSG00000047454	Gphn	Intergenic
3	129800410	129800624	9.5559	51.4284	47.1136	ENSMUSG00000093865	Lrit3	Exon2
15	78940688	78940844	9.55513	26.823	22.9809	ENSMUSG00000033099	Nol12	UTR3
11	116389816	116389916	9.55513	26.823	22.9809	ENSMUSG00000052949	Rnf157	Intron2
X	136976758	136976850	9.55513	26.823	22.9809	ENSMUSG00000089768	Tmsb15b1	UTR5
X	136976758	136976850	9.55513	26.823	22.9809	ENSMUSG00000072955	Tmsb15l	UTR5
9	50665404	50666020	9.55167	79.1917	74.5198	ENSMUSG00000032064	Dixdc1	LastExon
17	34959132	34959247	9.54482	33.7575	29.756	ENSMUSG00000090877	Hspa1b	UTR5
11	86689626	86690126	9.53699	71.4286	66.8432	ENSMUSG00000072582	Ptrh2	LastExon
17	35956843	35957082	9.53145	43.686	39.4975	ENSMUSG00000038762	Abcf1	UTR3
13	17803685	17804022	9.53145	43.686	39.4975	ENSMUSG00000041297	Cdk13	Exon1
11	61546361	61546776	9.52852	45.4406	41.2231	ENSMUSG00000001036	Epn2	Exon3
1	75388666	75389075	9.52364	53.6661	49.317	ENSMUSG00000026207	Speg	Exon4
17	24185287	24185660	9.51988	90.2309	85.448	ENSMUSG00000107169	Gm43796	Exon1
17	24185287	24185660	9.51988	90.2309	85.448	ENSMUSG00000036473	Tbc1d24	Exon3
10	75518006	75518116	9.51852	63.6667	59.179	ENSMUSG00000020180	Snrpd3	UTR5
7	4992924	4993072	9.51276	36.595	32.5354	ENSMUSG00000051550	Zfp579	UTR3
8	105856245	105856690	9.50985	47.1421	42.8964	ENSMUSG00000036442	Thap11	LastExon
4	145156183	145156610	9.50985	47.1421	42.8964	ENSMUSG00000020220	Vps13d	Exon19
7	99460722	99460958	9.50352	56.5315	52.1408	ENSMUSG00000035314	Gdpd5	UTR3
4	103162391	103162679	9.49501	35.9634	31.9168	ENSMUSG00000028522	Mier1	LastExon
13	109951455	109951842	9.49501	35.9634	31.9168	ENSMUSG00000021699	Pde4d	UTR3
3	124321449	124321666	9.49473	45.9164	41.6904	ENSMUSG00000044528	Tram1l1	LastExon
9	58498956	58499690	9.49457	55.9069	51.5249	ENSMUSG00000066607	Insyn1	LastExon
10	62750935	62751055	9.49438	75.9262	71.2889	ENSMUSG00000020074	Ccar1	Exon20
3	80687933	80688452	9.493	79.4536	74.7789	ENSMUSG00000033981	Gria2	UTR3
4	133680609	133681980	9.47526	78.1767	73.5156	ENSMUSG00000007880	Arid1a	LastExon
4	121147562	121147755	9.47003	120.512	115.473	ENSMUSG00000049878	Rlf	LastExon
11	71788873	71789269	9.45932	42.8721	38.6968	ENSMUSG00000020811	Wscd1	LastExon
1	74856082	74856426	9.44638	179.646	174.259	ENSMUSG00000090071	Cdk5r2	LastExon
5	110252877	110253147	9.43489	28.2895	24.4108	ENSMUSG00000029501	Ankle2	Exon11
6	81961848	81962099	9.43489	28.2895	24.4108	ENSMUSG00000030045	Mrpl19	UTR3
11	100463835	100463986	9.41813	29.9753	26.0578	ENSMUSG00000048732	Klhl11	LastExon
15	36241302	36241508	9.40228	64.893	60.389	ENSMUSG00000022280	Rnf19a	UTR3
7	25272939	25273383	9.40128	56.7003	52.3069	ENSMUSG00000005442	Cic	Exon2
8	14896718	14897014	9.38609	30.4762	26.5473	ENSMUSG00000026317	Cln8	LastExon
11	46440872	46441274	9.38481	42.6373	38.4663	ENSMUSG00000020397	Med7	LastExon
6	142828300	142829034	9.38333	91.698	86.8991	ENSMUSG00000030283	St8sia1	UTR3
5	140760186	140760716	9.38211	40.3029	36.1736	ENSMUSG00000000149	Gna12	UTR3
6	85947435	85947735	9.35713	44.874	40.6658	ENSMUSG00000030002	Dusp11	UTR3
10	81363895	81364249	9.34597	32.6806	28.7021	ENSMUSG00000020234	4930404N11Rik	UTR3
19	56724564	56724753	9.34597	32.6806	28.7021	ENSMUSG00000035283	Adrb1	UTR3
6	56778826	56779112	9.34597	32.6806	28.7021	ENSMUSG00000059486	Kbtbd2	UTR3
10	81363895	81364249	9.34597	32.6806	28.7021	ENSMUSG00000034854	Mfsd12	UTR3
3	34651228	34651680	9.33266	47.1148	42.8695	ENSMUSG00000074637	Sox2	LastExon
9	7183879	7184194	9.31241	34.8976	30.8728	ENSMUSG00000047193	Dync2h1	Intron1
17	86655339	86655934	9.31241	34.8976	30.8728	ENSMUSG00000045038	Prkce	UTR3
13	48585960	48586107	9.31241	34.8976	30.8728	ENSMUSG00000038042	Ptpdc1	Exon7
11	80353648	80353838	9.31241	34.8976	30.8728	ENSMUSG00000017692	Rhbdl3	LastExon
2	72970230	72970477	9.31087	49.3588	45.0771	ENSMUSG00000027109	Sp3	Exon4
19	5456553	5456851	9.30842	209.301	203.773	ENSMUSG00000095098	Ccdc85b	Intergenic
14	20736083	20736618	9.29765	80.6689	75.9823	ENSMUSG00000021820	Camk2g	UTR3
7	140853690	140854057	9.29136	51.6055	47.2878	ENSMUSG00000025484	Bet1l	UTR3
7	140853690	140854057	9.29136	51.6055	47.2878	ENSMUSG00000110136	Gm45785	LastIntron
11	58879937	58880183	9.28971	25.7079	21.893	ENSMUSG00000020491	2810021J22Rik	LastExon
17	80275090	80275455	9.28971	25.7079	21.893	ENSMUSG00000035051	Dhx57	Exon5
7	103827817	103827919	9.28971	25.7079	21.893	ENSMUSG00000052305	Hbb-bs	Exon1
1	172371793	172371990	9.28971	25.7079	21.893	ENSMUSG00000044708	Kcnj10	UTR3
12	102439630	102439725	9.28971	25.7079	21.893	ENSMUSG00000021190	Lgmn	UTR5
8	22757737	22757829	9.28971	25.7079	21.893	ENSMUSG00000031538	Plat	Exon1
5	135715898	135716064	9.28971	25.7079	21.893	ENSMUSG00000005514	Por	Exon2
7	121648379	121648798	9.28971	25.7079	21.893	ENSMUSG00000063317	Usp31	LastExon
18	24013966	24014481	9.28802	57.391	52.9877	ENSMUSG00000051469	Zfp24	UTR3
10	117845848	117845977	9.28393	37.1238	33.0539	ENSMUSG00000052681	Rap1b	UTR5
17	32977233	32977520	9.28393	37.1238	33.0539	ENSMUSG00000053600	Zfp472	LastExon
2	32353163	32353288	9.28073	99.7282	94.854	ENSMUSG00000026825	Dnm1	Exon1
4	150614125	150614229	9.27521	53.281	48.938	ENSMUSG00000039852	Rere	Exon17
10	67547792	67548049	9.27473	33.6489	29.6503	ENSMUSG00000057134	Ado	UTR3
10	77606238	77606342	9.27376	53.8544	49.5029	ENSMUSG00000112241	Gm49325	UTR5
6	71392976	71393173	9.27376	53.8544	49.5029	ENSMUSG00000002222	Rmnd5a	UTR3
10	77606238	77606342	9.27376	53.8544	49.5029	ENSMUSG00000020265	Sumo3	UTR5
15	97245064	97246347	9.26883	70.6401	66.064	ENSMUSG00000048218	Amigo2	LastExon
15	31458674	31458909	9.2675	30.7685	26.8324	ENSMUSG00000039100	2020-03-06	UTR3
11	113728216	113728983	9.26591	87.4406	82.6864	ENSMUSG00000041598	Cdc42ep4	UTR3
16	13147955	13148125	9.25944	39.3569	35.2451	ENSMUSG00000022545	Ercc4	UTR3
2	160949309	160949505	9.25702	72.8961	68.2938	ENSMUSG00000057133	Chd6	LastExon
14	31701685	31702150	9.25698	32.4577	28.4855	ENSMUSG00000014496	Ankrd28	UTR3
16	36041623	36042535	9.24871	57.2239	52.8228	ENSMUSG00000034379	Wdr5b	LastExon
3	129787886	129788465	9.24767	91.9573	87.1562	ENSMUSG00000093865	Lrit3	UTR3
13	21520195	21520953	9.24333	58.3575	53.9397	ENSMUSG00000063894	Zkscan8	LastExon
9	99583330	99584051	9.23817	41.5953	37.4424	ENSMUSG00000032469	Dbr1	LastExon
7	25202799	25203201	9.23817	41.5953	37.4424	ENSMUSG00000054499	Dedd2	LastExon
4	151062389	151062830	9.22822	54.8265	50.4601	ENSMUSG00000014592	Camta1	UTR3
11	119080589	119081188	9.22011	58.2565	53.8402	ENSMUSG00000039989	Cbx4	UTR3
4	21993304	21993572	9.21953	43.8379	39.6471	ENSMUSG00000028246	Faxc	LastExon
1	153743922	153744206	9.21792	62.8659	58.3889	ENSMUSG00000026475	Rgs16	UTR3
11	57531630	57531751	9.20299	33.4628	29.4679	ENSMUSG00000020522	Mfap3	UTR3
3	82108666	82109301	9.20195	74.908	70.2825	ENSMUSG00000033910	Gucy1a1	Exon5
5	116442652	116442909	9.20094	27.2109	23.359	ENSMUSG00000063919	Srrm4	UTR3
14	59629881	59630316	9.19297	27.1935	23.3419	ENSMUSG00000044461	Shisa2	LastExon
18	35266407	35266688	9.18836	48.3325	44.0669	ENSMUSG00000024357	Sil1	UTR3
4	134926968	134927249	9.18801	321.064	315.07	ENSMUSG00000037266	Rsrp1	LastExon
11	75450965	75451174	9.1678	29.3959	25.491	ENSMUSG00000045374	Wdr81	Exon1
7	30160730	30161581	9.16522	121.341	116.295	ENSMUSG00000037029	Zfp146	Intergenic
13	46752097	46752429	9.15263	55.0899	50.7194	ENSMUSG00000021375	Kif13a	Exon37
8	25767696	25768134	9.14712	31.6129	27.6582	ENSMUSG00000037316	Bag4	UTR3
16	32232970	32233231	9.14712	31.6129	27.6582	ENSMUSG00000035764	Fbxo45	UTR3
14	52182213	52182325	9.14712	31.6129	27.6582	ENSMUSG00000035726	Supt16	Exon4
2	3464310	3464716	9.14712	31.6129	27.6582	ENSMUSG00000026646	Suv39h2	Exon3
5	137290317	137290800	9.14544	106.788	101.853	ENSMUSG00000023328	Ache	Exon1
7	25625022	25625463	9.13393	59.6015	55.167	ENSMUSG00000057229	Dmac2	UTR3
7	44595713	44596026	9.13393	59.6015	55.167	ENSMUSG00000062785	Kcnc3	Exon2
X	151003531	151003623	9.12982	33.8402	29.8365	ENSMUSG00000025266	Gnl3l	Exon4
11	70940377	70940731	9.12982	33.8402	29.8365	ENSMUSG00000020817	Rabep1	LastExon
14	75343627	75343782	9.12982	33.8402	29.8365	ENSMUSG00000022000	Zc3h13	LastExon
3	89091579	89091860	9.1182	64.1168	59.6236	ENSMUSG00000105204	Gm43738	Intron10
3	89091579	89091860	9.1182	64.1168	59.6236	ENSMUSG00000041263	Rusc1	Exon2
8	83669977	83670106	9.11513	36.075	32.0261	ENSMUSG00000057672	Pkn1	UTR3
8	83669977	83670106	9.11513	36.075	32.0261	ENSMUSG00000019464	Ptger1	UTR3
13	45557060	45557452	9.1025	38.3154	34.2225	ENSMUSG00000046876	Atxn1	LastExon
3	126922984	126923957	9.09319	73.1547	68.549	ENSMUSG00000032826	Ank2	UTR3
5	118742581	118742717	9.09262	47.9807	43.7212	ENSMUSG00000018076	Med13l	Exon17
11	109436654	109436793	9.09154	40.5602	36.426	ENSMUSG00000020610	Amz2	LastExon
16	64855545	64855888	9.09154	40.5602	36.426	ENSMUSG00000054604	Cggbp1	UTR5
3	76707521	76707739	9.09154	40.5602	36.426	ENSMUSG00000034098	Fstl5	LastExon
9	59871795	59871927	9.09154	40.5602	36.426	ENSMUSG00000039585	Myo9a	Exon25
3	95988896	95989532	9.08192	42.8083	38.6339	ENSMUSG00000015745	Plekho1	UTR3
9	121472605	121472863	9.07342	45.059	40.8474	ENSMUSG00000032536	Trak1	UTR3
7	99267761	99268143	9.05907	49.5664	45.2812	ENSMUSG00000055407	Map6	UTR5
11	85345662	85345985	9.05907	49.5664	45.2812	ENSMUSG00000020525	Ppm1d	LastExon
1	155847297	155847455	9.05296	51.8224	47.5013	ENSMUSG00000033671	Cep350	UTR3
6	126708439	126708646	9.05296	51.8224	47.5013	ENSMUSG00000038077	Kcna6	UTR3
10	81153673	81154064	9.05296	51.8224	47.5013	ENSMUSG00000004934	Pias4	UTR3
14	69717105	69717380	9.04743	54.0795	49.7239	ENSMUSG00000034190	Chmp7	LastExon
10	116906796	116907083	9.0396	42.6676	38.4962	ENSMUSG00000064181	Rab3ip	UTR3
3	105668987	105669597	9.03244	30.2011	26.2781	ENSMUSG00000040896	Kcnd3	LastExon
2	66272584	66273158	9.03244	30.2011	26.2781	ENSMUSG00000064329	Scn1a	UTR3
6	86524981	86525323	9.02581	197.579	192.104	ENSMUSG00000051695	Pcbp1	LastExon
2	68118019	68118611	9.02429	24.6049	20.8182	ENSMUSG00000034780	B3galt1	LastExon
1	152508582	152508758	9.02429	24.6049	20.8182	ENSMUSG00000032649	Colgalt2	LastExon
7	119857537	119857937	9.02429	24.6049	20.8182	ENSMUSG00000048787	Dcun1d3	UTR3
1	59981639	59981769	9.02429	24.6049	20.8182	ENSMUSG00000041040	Fam117b	LastExon
6	58935261	58935658	9.02429	24.6049	20.8182	ENSMUSG00000037709	Fam13a	UTR3
3	108109017	108109167	9.02429	24.6049	20.8182	ENSMUSG00000000001	Gnai3	UTR3
3	100567464	100567642	9.02429	24.6049	20.8182	ENSMUSG00000008763	Man1a2	UTR3
8	94172764	94172858	9.02429	24.6049	20.8182	ENSMUSG00000031762	Mt2	UTR5
14	84533004	84533138	9.02429	24.6049	20.8182	ENSMUSG00000035566	Pcdh17	LastExon
19	59298530	59298682	9.02429	24.6049	20.8182	ENSMUSG00000074746	Pdzd8	UTR3
9	36892287	36892558	9.02429	24.6049	20.8182	ENSMUSG00000035934	Pknox2	UTR3
9	67938515	67938603	9.01698	19.1916	15.0309	ENSMUSG00000035284	Vps13c	Intron51
11	49245323	49245571	9.01678	72.161	67.5667	ENSMUSG00000020346	Mgat1	UTR5
18	37686946	37687387	9.01387	25.136	21.3358	ENSMUSG00000102836	Gm37013	Intron1
18	37686946	37687387	9.01387	25.136	21.3358	ENSMUSG00000103125	Gm37388	Intron1
18	37686946	37687387	9.01387	25.136	21.3358	ENSMUSG00000103458	Gm42416	Intron1
18	37686946	37687387	9.01387	25.136	21.3358	ENSMUSG00000103144	Pcdhga1	Intron1
18	37686946	37687387	9.01387	25.136	21.3358	ENSMUSG00000103332	Pcdhga2	Intron1
18	37686946	37687387	9.01387	25.136	21.3358	ENSMUSG00000104346	Pcdhga3	Intron1
18	37686946	37687387	9.01387	25.136	21.3358	ENSMUSG00000103677	Pcdhga4	Exon1
18	37686946	37687387	9.01387	25.136	21.3358	ENSMUSG00000103037	Pcdhgb1	Intron1
13	111755869	111756036	8.98162	35.1333	31.1028	ENSMUSG00000021754	Map3k1	Exon14
1	97645519	97646300	8.97842	54.3584	49.999	ENSMUSG00000044768	D1Ertd622e	UTR3
17	84993782	84994397	8.97698	135.533	130.387	ENSMUSG00000061130	Ppm1b	Exon2
1	139248143	139249045	8.9708	158.169	152.892	ENSMUSG00000063681	Crb1	Exon5
4	156125548	156125886	8.96964	27.8154	23.9484	ENSMUSG00000059939	9430015G10Rik	LastExon
11	22836292	22836407	8.95105	26.1088	22.2847	ENSMUSG00000051650	B3gnt2	LastExon
11	101176047	101176209	8.95105	26.1088	22.2847	ENSMUSG00000017167	Cntnap1	UTR5
11	22836292	22836407	8.95105	26.1088	22.2847	ENSMUSG00000098650	Gm28048	UTR3
7	64337751	64338103	8.95105	26.1088	22.2847	ENSMUSG00000030522	Mtmr10	LastExon
19	56570567	56570816	8.95105	26.1088	22.2847	ENSMUSG00000025078	Nhlrc2	Exon3
19	53864192	53864300	8.95105	26.1088	22.2847	ENSMUSG00000043639	Rbm20	UTR3
17	45392031	45392311	8.94952	28.3257	24.4459	ENSMUSG00000023932	Cdc5l	UTR3
10	83365807	83366108	8.94952	28.3257	24.4459	ENSMUSG00000020255	D10Wsu102e	LastExon
16	38526327	38526648	8.94952	28.3257	24.4459	ENSMUSG00000034064	Poglut1	LastExon
9	64311713	64311870	8.94827	30.5544	26.6232	ENSMUSG00000032396	Dis3l	Exon12
3	63963551	63963688	8.94827	30.5544	26.6232	ENSMUSG00000027822	Slc33a1	Exon1
4	102943548	102943768	8.94722	32.7913	28.81	ENSMUSG00000028524	Sgip1	Intron18
13	49383155	49383505	8.94633	35.0342	31.0058	ENSMUSG00000037933	Bicd2	LastExon
9	85743413	85743544	8.94633	35.0342	31.0058	ENSMUSG00000035941	Ibtk	Exon2
15	72799764	72799916	8.94556	37.2814	33.2087	ENSMUSG00000047921	Trappc9	UTR3
12	11436468	11436592	8.94556	37.2814	33.2087	ENSMUSG00000054459	Vsnl1	UTR5
13	101684689	101684847	8.9449	39.532	35.4166	ENSMUSG00000041417	Pik3r1	UTR3
1	186624700	186624909	8.94431	41.7852	37.6295	ENSMUSG00000039239	Tgfb2	UTR3
18	5767669	5767879	8.94431	41.7852	37.6295	ENSMUSG00000024238	Zeb1	Exon6
8	9987655	9987947	8.9438	44.0403	39.8463	ENSMUSG00000040396	Abhd13	LastExon
12	80338431	80339228	8.9438	44.0403	39.8463	ENSMUSG00000049106	Dcaf5	UTR3
9	100552689	100552915	8.9438	44.0403	39.8463	ENSMUSG00000070287	Slc35g2	LastExon
4	125072685	125072830	8.9438	44.0403	39.8463	ENSMUSG00000050213	Snip1	LastExon
17	46801006	46801757	8.94334	46.2971	42.065	ENSMUSG00000036568	Bicral	UTR3
2	126630107	126630413	8.94334	46.2971	42.065	ENSMUSG00000027361	Gabpb1	UTR3
11	65690247	65690774	8.94334	46.2971	42.065	ENSMUSG00000033352	Map2k4	UTR3
11	6473507	6474374	8.94262	89.8696	85.0897	ENSMUSG00000094483	Purb	UTR3
11	118410977	118411149	8.94256	50.8142	46.5093	ENSMUSG00000025575	Cant1	Exon2
14	31011591	31011907	8.94222	53.0742	48.7343	ENSMUSG00000021916	Glt8d1	LastExon
5	9121115	9121353	8.94115	62.1198	57.6521	ENSMUSG00000042508	Dmtf1	UTR3
4	137656117	137656421	8.94036	71.171	66.5884	ENSMUSG00000043411	Usp48	LastExon
12	87453855	87453986	8.93952	84.7526	80.0247	ENSMUSG00000021039	Snw1	LastExon
13	55699190	55699485	8.93893	98.3366	93.4762	ENSMUSG00000045767	B230219D22Rik	LastExon
9	110428527	110428830	8.93718	191.158	185.711	ENSMUSG00000054792	Klhl18	UTR3
14	37061599	37062244	8.90525	160.764	155.473	ENSMUSG00000041044	Lrit1	LastExon
18	31888656	31889087	8.90242	29.3268	25.4235	ENSMUSG00000024400	Wdr33	Exon16
1	179625048	179625459	8.89456	46.1187	41.8892	ENSMUSG00000038949	Cnst	LastExon
X	99470616	99470708	8.89342	56.815	52.4196	ENSMUSG00000034403	Pja1	UTR5
11	120011476	120011938	8.88988	56.7992	52.4039	ENSMUSG00000025375	Aatk	Exon11
15	39878303	39878685	8.88225	29.8336	25.9187	ENSMUSG00000022305	Lrp12	Exon4
17	56259215	56259775	8.87783	32.0493	28.0846	ENSMUSG00000043683	Fem1a	UTR3
10	99022878	99023449	8.86812	148.478	143.253	ENSMUSG00000019943	Atp2b1	LastExon
13	14637440	14637662	8.86635	28.1315	24.2567	ENSMUSG00000039182	AW209491	LastExon
8	3625468	3625563	8.86631	72.4492	67.852	ENSMUSG00000004630	Pcp2	Exon1
2	112266339	112266539	8.85579	54.3988	50.0389	ENSMUSG00000096764	Gm21985	UTR5
11	108343766	108343888	8.85262	61.1277	56.6727	ENSMUSG00000050965	Prkca	UTR5
2	153235988	153236190	8.8502	24.2459	20.47	ENSMUSG00000051413	Plagl2	Exon2
6	93678205	93678952	8.84936	116.773	111.761	ENSMUSG00000045095	Magi1	UTR3
16	36911996	36912687	8.84643	54.9198	50.5519	ENSMUSG00000034243	Golgb1	Exon13
8	71968331	71968712	8.84625	28.6373	24.7508	ENSMUSG00000052446	Zfp961	LastExon
9	56494513	56495192	8.84145	54.3368	49.9779	ENSMUSG00000032329	Hmg20a	UTR3
2	25938112	25938620	8.84127	115.014	110.014	ENSMUSG00000026933	Camsap1	Exon11
11	85837914	85838177	8.83933	156.573	151.303	ENSMUSG00000000093	Tbx2	Exon6
16	30601337	30601723	8.83702	52.0739	47.7495	ENSMUSG00000046546	Fam43a	LastExon
2	127791433	127791709	8.83216	49.8114	45.5226	ENSMUSG00000051319	1500011K16Rik	UTR3
9	121982210	121982610	8.83216	49.8114	45.5226	ENSMUSG00000066235	Pomgnt2	LastExon
2	21827891	21828102	8.82716	29.1445	25.2452	ENSMUSG00000045967	Gpr158	UTR3
17	56899858	56900302	8.82679	47.5494	43.2968	ENSMUSG00000024212	Mllt1	Exon6
6	113151148	113151672	8.82083	45.2882	41.0727	ENSMUSG00000034269	Setd5	LastExon
4	45284396	45284783	8.81963	101.915	97.022	ENSMUSG00000035615	Frmpd1	LastExon
10	115390673	115391066	8.81611	85.0609	80.3303	ENSMUSG00000034163	Zfc3h1	Exon2
2	168926276	168926420	8.80697	27.4415	23.5836	ENSMUSG00000027551	Zfp64	Intron5
6	56779482	56779897	8.80671	40.7686	36.6305	ENSMUSG00000059486	Kbtbd2	LastExon
7	45803845	45804131	8.80671	40.7686	36.6305	ENSMUSG00000062044	Lmtk3	UTR3
8	110957301	110957497	8.80671	40.7686	36.6305	ENSMUSG00000031749	St3gal2	UTR5
4	152026387	152026783	8.80671	40.7686	36.6305	ENSMUSG00000028952	Zbtb48	Exon2
2	152687292	152687548	8.79826	38.5108	34.4147	ENSMUSG00000019188	H13	Intron4
2	152687292	152687548	8.79826	38.5108	34.4147	ENSMUSG00000042814	Mcts2	LastExon
10	81207832	81207939	8.79243	71.4677	66.8819	ENSMUSG00000034958	Atcay	Exon11
6	42670052	42670334	8.78754	69.2021	64.6427	ENSMUSG00000036667	Tcaf1	UTR3
3	82392618	82392991	8.78363	25.743	21.927	ENSMUSG00000033900	Map9	UTR3
13	23991068	23991165	8.7831	44.5926	40.3896	ENSMUSG00000021337	Scgn	UTR5
9	106895693	106895845	8.77753	34.0014	29.9939	ENSMUSG00000039716	Dock3	LastExon
9	25150847	25151113	8.77753	34.0014	29.9939	ENSMUSG00000008429	Herpud2	LastExon
7	44462725	44462945	8.77753	34.0014	29.9939	ENSMUSG00000047085	Lrrc4b	LastExon
2	156307440	156307850	8.77753	34.0014	29.9939	ENSMUSG00000038116	Phf20	UTR3
19	4144707	4145123	8.7683	90.8856	86.0946	ENSMUSG00000044724	Gpr152	UTR3
2	118833741	118834030	8.76462	31.7512	27.7935	ENSMUSG00000027331	Knstrn	LastIntron
2	167038215	167038352	8.76397	26.2463	22.4184	ENSMUSG00000039501	Znfx1	LastExon
2	158638851	158639148	8.75887	23.5144	19.757	ENSMUSG00000037761	Actr5	LastExon
9	8101396	8101716	8.75887	23.5144	19.757	ENSMUSG00000040729	Cep126	Exon6
19	43441717	43441944	8.75887	23.5144	19.757	ENSMUSG00000025189	Cnnm1	Exon1
4	11583938	11584136	8.75887	23.5144	19.757	ENSMUSG00000094595	Fsbp	LastExon
9	107590101	107590193	8.75887	23.5144	19.757	ENSMUSG00000010048	Ifrd2	Exon3
7	64337751	64338103	8.75887	23.5144	19.757	ENSMUSG00000030522	Mtmr10	LastExon
4	11583938	11584136	8.75887	23.5144	19.757	ENSMUSG00000078773	Rad54b	Intron3
6	71427719	71427811	8.75887	23.5144	19.757	ENSMUSG00000002222	Rmnd5a	Intron2
1	105284564	105284780	8.75887	23.5144	19.757	ENSMUSG00000047496	Rnf152	LastExon
2	54084522	54084860	8.75887	23.5144	19.757	ENSMUSG00000075334	Rprm	UTR3
1	171145778	171145870	8.75887	23.5144	19.757	ENSMUSG00000058076	Sdhc	Intron1
17	85985351	85985473	8.75887	23.5144	19.757	ENSMUSG00000024135	Srbd1	LastExon
17	72836699	72836791	8.75887	23.5144	19.757	ENSMUSG00000039770	Ypel5	UTR5
7	13005904	13006111	8.75887	23.5144	19.757	ENSMUSG00000049600	Zbtb45	UTR3
5	36795336	36795490	8.75828	141.063	135.882	ENSMUSG00000055302	Mrfap1	UTR3
11	107876809	107876965	8.74942	29.5055	25.5975	ENSMUSG00000040373	Cacng5	UTR3
4	62394198	62394340	8.74942	29.5055	25.5975	ENSMUSG00000066149	Cdc26	UTR3
3	96155752	96156074	8.7455	116.379	111.37	ENSMUSG00000038495	Otud7b	LastExon
14	110749588	110750347	8.7454	26.7514	22.9114	ENSMUSG00000045871	Slitrk6	UTR3
5	142666976	142667091	8.74407	36.6764	32.6153	ENSMUSG00000029578	Wipi2	UTR3
7	45816935	45817664	8.7323	530.055	523.46	ENSMUSG00000058743	Kcnj14	UTR3
1	36512964	36513093	8.73124	27.266	23.4125	ENSMUSG00000001138	Cnnm3	Exon1
17	34969405	34969737	8.73124	27.266	23.4125	ENSMUSG00000091971	Hspa1a	UTR3
12	74897598	74898331	8.73124	27.266	23.4125	ENSMUSG00000034402	Kcnh5	LastExon
11	82783573	82783835	8.73124	27.266	23.4125	ENSMUSG00000020697	Lig3	Exon2
14	31493597	31493834	8.73124	27.266	23.4125	ENSMUSG00000021891	Mettl6	Exon2
19	32514267	32514944	8.73124	27.266	23.4125	ENSMUSG00000024896	Minpp1	LastExon
7	80316908	80317047	8.73124	27.266	23.4125	ENSMUSG00000038930	Rccd1	Exon4
16	59475757	59475851	8.73124	27.266	23.4125	ENSMUSG00000022724	Riox2	Exon2
8	95837185	95837524	8.73124	27.266	23.4125	ENSMUSG00000036534	Slc38a7	UTR3
2	110011745	110011945	8.71668	25.0519	21.254	ENSMUSG00000050199	Lgr4	LastExon
17	46736130	46736310	8.71166	155.003	149.742	ENSMUSG00000023973	Cnpy3	UTR3
4	152012573	152012689	8.70913	25.0356	21.2382	ENSMUSG00000073700	Klhl21	Exon2
2	97630692	97630968	8.70913	25.0356	21.2382	ENSMUSG00000050587	Lrrc4c	LastExon
12	4416716	4416816	8.70913	25.0356	21.2382	ENSMUSG00000020647	Ncoa1	UTR5
7	29776216	29776629	8.70913	25.0356	21.2382	ENSMUSG00000046185	Zfp84	LastExon
11	20825960	20826505	8.70148	104.854	99.9339	ENSMUSG00000042363	Lgalsl	UTR3
17	3197777	3198204	8.69932	85.384	80.6502	ENSMUSG00000046201	Scaf8	LastExon
3	84165018	84165147	8.69832	44.2853	40.087	ENSMUSG00000027993	Trim2	UTR3
8	121601640	121601777	8.69732	33.2243	29.2342	ENSMUSG00000092329	Gm20388	Intron1
8	121601640	121601777	8.69732	33.2243	29.2342	ENSMUSG00000061410	Zcchc14	UTR3
13	117656678	117656934	8.68971	180.272	174.881	ENSMUSG00000021730	Hcn1	Exon2
16	21652951	21653680	8.68547	61.4232	56.9642	ENSMUSG00000043391	2510009E07Rik	UTR3
1	194620247	194620393	8.68547	61.4232	56.9642	ENSMUSG00000026640	Plxna2	UTR5
1	132449529	132449840	8.68456	42.0217	37.8616	ENSMUSG00000042046	Dstyk	Exon3
4	141115489	141115755	8.68456	42.0217	37.8616	ENSMUSG00000040842	Szrd1	UTR3
8	109939745	109940130	8.68318	53.0936	48.7536	ENSMUSG00000031732	Phlpp2	LastExon
8	124002975	124003067	8.68298	23.3588	19.607	ENSMUSG00000092329	Gm20388	Intron1
8	124002975	124003067	8.68298	23.3588	19.607	ENSMUSG00000038697	Taf5l	Exon4
8	123954150	123954421	8.68151	26.0612	22.238	ENSMUSG00000031974	Abcb10	UTR3
8	123954150	123954421	8.68151	26.0612	22.238	ENSMUSG00000092329	Gm20388	Intron1
9	102732122	102732247	8.68038	28.7863	24.8955	ENSMUSG00000032531	Amotl2	UTR3
11	80478847	80478979	8.67816	37.0281	32.9604	ENSMUSG00000048895	Cdk5r1	UTR3
7	24106133	24106399	8.67766	39.787	35.6669	ENSMUSG00000057101	Zfp180	UTR3
10	115415624	115415729	8.67557	59.1564	54.7281	ENSMUSG00000034163	Zfc3h1	Exon20
3	58416150	58416436	8.66443	23.8586	20.092	ENSMUSG00000027806	Tsc22d2	Exon1
2	156097830	156098345	8.66094	49.1245	44.8461	ENSMUSG00000074643	Cpne1	Intron2
2	156097830	156098345	8.66094	49.1245	44.8461	ENSMUSG00000098950	Gm28036	Exon3
2	156097830	156098345	8.66094	49.1245	44.8461	ENSMUSG00000089824	Rbm12	LastExon
3	67474721	67474944	8.65162	37.4968	33.4194	ENSMUSG00000027774	Gfm1	LastExon
5	115097278	115097614	8.65162	37.4968	33.4194	ENSMUSG00000029550	Sppl3	UTR3
4	40474138	40474910	8.64707	86.6842	81.9379	ENSMUSG00000046593	Tmem215	LastExon
19	9996437	9996547	8.64128	18.0307	13.9149	ENSMUSG00000037418	Best1	Intron2
8	28744397	28744485	8.64128	18.0307	13.9149	ENSMUSG00000063626	Unc5d	Intron7
12	21417502	21417590	8.64128	18.0307	13.9149	ENSMUSG00000076432	Ywhaq	UTR5
18	54897359	54897627	8.6405	52.3557	48.0268	ENSMUSG00000052713	Zfp608	Exon5
12	85268002	85268148	8.63954	30.3244	26.3979	ENSMUSG00000021245	Mlh3	Exon2
11	29463805	29463968	8.63168	35.236	31.2033	ENSMUSG00000032740	Ccdc88a	Exon15
19	28964846	28965192	8.63168	35.236	31.2033	ENSMUSG00000040105	Plpp6	LastExon
2	28469596	28469956	8.63143	33.5888	29.5916	ENSMUSG00000035772	Mrps2	LastExon
8	9207498	9208000	8.62661	50.0887	45.7952	ENSMUSG00000079157	Fam155a	UTR3
1	88266000	88266465	8.62661	50.0887	45.7952	ENSMUSG00000044783	Hjurp	LastExon
6	47525698	47525906	8.62406	64.9807	60.4757	ENSMUSG00000029686	Cul1	UTR3
8	83566773	83566884	8.62252	79.8831	75.204	ENSMUSG00000033938	Ndufb7	Exon1
18	14969403	14969669	8.61135	47.8219	43.5648	ENSMUSG00000036225	Kctd1	UTR3
15	98135868	98136409	8.61119	40.6665	36.5308	ENSMUSG00000048175	Asb8	LastExon
5	142477416	142477608	8.60873	32.9769	28.9919	ENSMUSG00000039623	Ap5z1	LastExon
6	42317869	42318093	8.60873	32.9769	28.9919	ENSMUSG00000029861	Fam131b	UTR3
7	99925351	99925558	8.60873	32.9769	28.9919	ENSMUSG00000058761	Rnf169	LastExon
7	56230916	56231361	8.60588	90.2549	85.4717	ENSMUSG00000030451	Herc2	LastExon
18	31910239	31910657	8.60369	75.3484	70.7176	ENSMUSG00000044982	Sft2d3	UTR3
9	110548507	110548760	8.60059	25.8785	22.0598	ENSMUSG00000044791	Setd2	Exon3
3	96578491	96578638	8.60032	60.4453	55.9995	ENSMUSG00000087610	Gm16253	LastIntron
3	96578491	96578638	8.60032	60.4453	55.9995	ENSMUSG00000028104	Polr3gl	UTR3
4	98934142	98934680	8.59479	41.709	37.5544	ENSMUSG00000028560	Usp1	LastExon
7	133759434	133759817	8.5945	45.5551	41.3355	ENSMUSG00000030986	Dhx32	Exon2
8	34137568	34137769	8.5934	73.0808	68.4761	ENSMUSG00000031513	Leprotl1	UTR3
1	132360299	132360605	8.58991	140.819	135.639	ENSMUSG00000042066	Tmcc2	Exon2
1	36103619	36104499	8.58704	58.1773	53.7619	ENSMUSG00000045216	Hs6st1	LastExon
6	32792676	32792877	8.58558	45.5211	41.3022	ENSMUSG00000053768	Chchd3	UTR3
1	59215248	59215524	8.58203	30.72	26.7847	ENSMUSG00000026024	Als2	Exon4
X	134689682	134690085	8.58203	30.72	26.7847	ENSMUSG00000049804	Armcx4	LastExon
3	105704689	105704781	8.58203	30.72	26.7847	ENSMUSG00000048458	Inka2	UTR5
18	62514847	62515296	8.57862	46.0438	41.8158	ENSMUSG00000042211	Fbxo38	Exon15
12	112821514	112821787	8.57444	23.6694	19.9085	ENSMUSG00000047832	Cdca4	LastExon
1	13174100	13174848	8.56146	60.8004	56.3501	ENSMUSG00000005886	Ncoa2	Exon11
7	123479821	123480757	8.55705	53.641	49.2922	ENSMUSG00000030757	Zkscan2	UTR3
6	59210237	59210384	8.55494	41.0219	36.8792	ENSMUSG00000049232	Tigd2	LastExon
16	56006898	56007368	8.55494	41.0219	36.8792	ENSMUSG00000022601	Zbtb11	LastExon
7	127559033	127559633	8.55388	51.4322	47.1172	ENSMUSG00000107023	Gm42715	Exon29
7	127559033	127559633	8.55388	51.4322	47.1172	ENSMUSG00000053877	Srcap	LastExon
5	135159395	135159554	8.55057	28.4662	24.583	ENSMUSG00000005374	Tbl2	LastExon
15	58873549	58873993	8.55057	28.4662	24.583	ENSMUSG00000037085	Trmt12	LastExon
13	80894089	80894253	8.54254	42.073	37.9122	ENSMUSG00000074794	Arrdc3	UTR3
9	108209180	108209409	8.53841	28.4361	24.5536	ENSMUSG00000039952	Dag1	LastExon
18	24013966	24014481	8.53647	74.3831	69.7634	ENSMUSG00000051469	Zfp24	UTR3
8	107046837	107047259	8.5315	38.7558	34.6544	ENSMUSG00000031916	Cog8	UTR3
8	9770172	9770528	8.5315	38.7558	34.6544	ENSMUSG00000079157	Fam155a	Exon1
8	107046837	107047259	8.5315	38.7558	34.6544	ENSMUSG00000078931	Pdf	UTR3
12	80754461	80754616	8.53014	23.5759	19.8176	ENSMUSG00000062961	Ccdc177	UTR3
13	34075144	34075516	8.5216	105.519	100.594	ENSMUSG00000058672	Tubb2a	LastExon
4	124855463	124855591	8.52141	49.104	44.8259	ENSMUSG00000042763	Maneal	UTR3
4	134804237	134804354	8.51824	40.3488	36.2186	ENSMUSG00000028826	Maco1	LastExon
3	101060789	101060915	8.51296	26.2169	22.3902	ENSMUSG00000027864	Ptgfrn	Exon5
8	106264990	106265292	8.51296	26.2169	22.3902	ENSMUSG00000031906	Smpd3	Exon3
17	46168726	46168872	8.50903	70.9301	66.3506	ENSMUSG00000023952	Gtpbp2	UTR3
3	37319699	37319896	8.50499	36.49	32.4322	ENSMUSG00000051444	Bbs12	LastExon
2	18027103	18027261	8.49879	22.9779	19.2367	ENSMUSG00000054057	A930004D18Rik	LastExon
4	127124028	127124170	8.49879	22.9779	19.2367	ENSMUSG00000070737	Tmem35b	UTR5
4	127124028	127124170	8.49879	22.9779	19.2367	ENSMUSG00000042408	Zmym6	LastExon
10	9760431	9760924	8.49852	57.2027	52.8019	ENSMUSG00000019790	Stxbp5	UTR3
3	108644464	108644706	8.49842	152.885	147.635	ENSMUSG00000040389	Wdr47	LastExon
4	62191933	62192120	8.49689	67.5783	63.0401	ENSMUSG00000028389	Zfp37	LastExon
1	60477134	60477252	8.49345	22.4368	18.7105	ENSMUSG00000026782	Abi2	UTR3
1	53347069	53347324	8.49345	22.4368	18.7105	ENSMUSG00000026095	Asnsd1	Exon4
11	52027001	52027103	8.49345	22.4368	18.7105	ENSMUSG00000020389	Cdkl3	Exon8
19	43736515	43736759	8.49345	22.4368	18.7105	ENSMUSG00000040018	Cox15	UTR3
6	36847318	36847438	8.49345	22.4368	18.7105	ENSMUSG00000038665	Dgki	UTR3
7	134918096	134918674	8.49345	22.4368	18.7105	ENSMUSG00000058325	Dock1	Intron27
17	26508382	26508502	8.49345	22.4368	18.7105	ENSMUSG00000024190	Dusp1	Exon1
7	134918096	134918674	8.49345	22.4368	18.7105	ENSMUSG00000073805	Fam196a	Intron1
8	69909548	69909698	8.49345	22.4368	18.7105	ENSMUSG00000036180	Gatad2a	UTR3
19	58237924	58238283	8.49345	22.4368	18.7105	ENSMUSG00000025089	Gfra1	UTR3
1	53347069	53347324	8.49345	22.4368	18.7105	ENSMUSG00000099913	Gm28551	Exon4
3	108149759	108149949	8.49345	22.4368	18.7105	ENSMUSG00000046793	Gpr61	UTR3
16	91562977	91563247	8.49345	22.4368	18.7105	ENSMUSG00000022965	Ifngr2	LastExon
12	41451792	41452249	8.49345	22.4368	18.7105	ENSMUSG00000056899	Immp2l	Intron4
12	41451792	41452249	8.49345	22.4368	18.7105	ENSMUSG00000036295	Lrrn3	UTR3
7	18958338	18958452	8.49345	22.4368	18.7105	ENSMUSG00000030411	Nova2	LastExon
5	137737841	137737953	8.49345	22.4368	18.7105	ENSMUSG00000045348	Nyap1	Exon2
3	131642994	131643137	8.49345	22.4368	18.7105	ENSMUSG00000028032	Papss1	LastExon
3	10437908	10438237	8.49345	22.4368	18.7105	ENSMUSG00000027534	Snx16	Exon2
17	6037906	6038123	8.49345	22.4368	18.7105	ENSMUSG00000023805	Synj2	LastExon
2	30960773	30961045	8.49345	22.4368	18.7105	ENSMUSG00000026849	Tor1a	LastExon
16	77115488	77115728	8.49345	22.4368	18.7105	ENSMUSG00000022867	Usp25	LastExon
7	12493625	12493738	8.49345	22.4368	18.7105	ENSMUSG00000030386	Zfp606	LastExon
2	121161132	121161478	8.49345	22.4368	18.7105	ENSMUSG00000050619	Zscan29	LastExon
11	88193358	88193814	8.4933	232.049	226.411	ENSMUSG00000018378	Cuedc1	UTR3
13	58004450	58004934	8.48982	31.0169	27.0754	ENSMUSG00000014164	Klhl3	UTR3
4	45278948	45279474	8.48287	75.6894	71.0549	ENSMUSG00000035615	Frmpd1	Exon15
11	82765077	82765452	8.48028	55.4781	51.1022	ENSMUSG00000046010	Zfp830	LastExon
11	84401019	84401164	8.47474	34.2249	30.2131	ENSMUSG00000020532	Acaca	UTR3
11	94211441	94211549	8.47474	34.2249	30.2131	ENSMUSG00000037573	Tob1	UTR5
9	49407781	49407958	8.46721	23.9742	20.2048	ENSMUSG00000032259	Drd2	UTR3
11	3244019	3244169	8.46721	23.9742	20.2048	ENSMUSG00000020454	Eif4enif1	LastExon
14	58073122	58073240	8.46721	23.9742	20.2048	ENSMUSG00000021974	Fgf9	Intron1
12	51768577	51768727	8.46582	63.0408	58.5618	ENSMUSG00000035247	Hectd1	Exon25
11	120610345	120610479	8.46582	63.0408	58.5618	ENSMUSG00000025137	Pcyt2	UTR3
11	120488344	120488695	8.46091	52.6642	48.3302	ENSMUSG00000039640	Mrpl12	LastExon
7	30104264	30104561	8.44319	25.5204	21.7113	ENSMUSG00000049421	Zfp260	UTR5
5	36747807	36748052	8.43726	34.6544	30.634	ENSMUSG00000060708	Bloc1s4	UTR3
9	69378785	69379325	8.43232	76.9994	72.3509	ENSMUSG00000032238	Rora	LastExon
1	9745927	9746186	8.43002	58.5022	54.0825	ENSMUSG00000045210	Vcpip1	Exon1
7	16564504	16564956	8.42532	40.0287	35.9043	ENSMUSG00000058230	Arhgap35	Exon2
15	98135868	98136409	8.42532	40.0287	35.9043	ENSMUSG00000048175	Asb8	LastExon
13	104228687	104228805	8.42532	40.0287	35.9043	ENSMUSG00000021713	Ppwd1	Exon1
2	3464310	3464716	8.42532	40.0287	35.9043	ENSMUSG00000026646	Suv39h2	Exon3
2	153208685	153208847	8.42532	40.0287	35.9043	ENSMUSG00000068040	Tm9sf4	LastExon
9	108099325	108099445	8.41986	22.2863	18.565	ENSMUSG00000032589	Bsn	UTR3
11	59875904	59876044	8.41659	27.0616	23.2126	ENSMUSG00000032615	Nt5m	LastIntron
4	141479205	141479369	8.4145	31.8895	27.9293	ENSMUSG00000040761	Spen	Exon12
7	37479466	37479962	8.40999	56.2325	51.8463	ENSMUSG00000043456	Zfp536	LastExon
7	29844487	29844587	8.40959	22.792	19.0556	ENSMUSG00000050855	Zfp940	LastExon
19	23141814	23142042	8.40467	107.204	102.265	ENSMUSG00000033863	Klf9	Exon1
18	77152695	77153013	8.39995	23.2995	19.5488	ENSMUSG00000025423	Pias2	LastExon
8	9770172	9770528	8.39943	29.6979	25.7853	ENSMUSG00000079157	Fam155a	Exon1
10	105826353	105826460	8.39943	29.6979	25.7853	ENSMUSG00000036009	Mettl25	UTR3
2	126707346	126707442	8.39943	29.6979	25.7853	ENSMUSG00000027363	Usp8	UTR5
2	119297855	119298224	8.39566	33.4513	29.4565	ENSMUSG00000034216	Vps18	UTR3
1	12858875	12859531	8.3939	37.7597	33.6769	ENSMUSG00000016918	Sulf1	UTR3
5	115125315	115125456	8.3939	37.7597	33.6769	ENSMUSG00000046562	Unc119b	UTR3
8	126591361	126591626	8.39088	23.8087	20.0434	ENSMUSG00000051495	Irf2bp2	LastExon
16	34879086	34879217	8.39088	23.8087	20.0434	ENSMUSG00000022836	Mylk	Exon8
6	8593218	8593405	8.39055	45.8544	41.63	ENSMUSG00000029638	Glcci1	LastExon
6	8593218	8593405	8.39055	45.8544	41.63	ENSMUSG00000107705	Gm45062	UTR3
9	83395694	83395990	8.38831	53.9626	49.6091	ENSMUSG00000032258	Lca5	LastExon
8	77596521	77597022	8.3867	62.0768	57.6099	ENSMUSG00000031617	Tmem184c	LastExon
8	71623560	71623819	8.38318	94.5517	89.7253	ENSMUSG00000034807	Colgalt1	LastExon
11	101278191	101278342	8.38077	151.385	146.144	ENSMUSG00000017188	Coa3	UTR3
7	35775869	35776286	8.38025	29.6473	25.7366	ENSMUSG00000044452	Zfp507	UTR3
12	91808516	91809472	8.37012	52.2567	47.9295	ENSMUSG00000020964	Sel1l	UTR3
7	44829564	44830117	8.36213	31.2063	27.2617	ENSMUSG00000074141	Il4i1	Intron1
7	44829564	44830117	8.36213	31.2063	27.2617	ENSMUSG00000109511	Nup62	LastExon
2	168099100	168099329	8.35928	37.1074	33.0379	ENSMUSG00000044641	Pard6b	LastExon
5	20896096	20896691	8.35835	35.4907	31.4536	ENSMUSG00000039968	Rsbn1l	UTR3
5	127783634	127784802	8.35254	26.3744	22.5434	ENSMUSG00000034310	Tmem132d	UTR3
11	67041654	67041864	8.35172	27.4369	23.5792	ENSMUSG00000020910	Adprm	Exon3
18	56708218	56708313	8.35172	27.4369	23.5792	ENSMUSG00000024590	Lmnb1	Exon1
8	22940323	22940687	8.33078	41.3132	37.1658	ENSMUSG00000031540	Kat6a	LastExon
12	52519382	52519531	8.32906	63.3866	58.9029	ENSMUSG00000035133	Arhgap5	Exon2
1	59163974	59164187	8.32833	28.4437	24.5612	ENSMUSG00000026024	Als2	UTR3
7	64268269	64269207	8.32719	173.869	168.51	ENSMUSG00000030523	Trpm1	LastExon
10	19004466	19005171	8.32667	124.82	119.75	ENSMUSG00000019850	Tnfaip3	Exon6
2	5294443	5294601	8.32637	60.6777	56.2293	ENSMUSG00000039145	Camk1d	UTR3
2	59843607	59844069	8.32225	22.6088	18.8768	ENSMUSG00000035168	Tanc1	LastExon
18	31780859	31781140	8.31781	33.2218	29.2318	ENSMUSG00000041915	Ammecr1l	UTR3
1	75388666	75389075	8.31781	33.2218	29.2318	ENSMUSG00000026207	Speg	Exon4
17	46398749	46398941	8.31781	33.2218	29.2318	ENSMUSG00000015597	Zfp318	Exon4
5	31199910	31200075	8.31619	69.2389	64.679	ENSMUSG00000043059	Zfp513	LastExon
16	93870701	93871080	8.31381	43.4001	39.2167	ENSMUSG00000039456	Morc3	Exon15
12	40036149	40036667	8.31101	47.1506	42.9046	ENSMUSG00000047446	Arl4a	Intron2
17	65967718	65968086	8.30792	37.4757	33.3988	ENSMUSG00000034647	Ankrd12	UTR3
13	103743276	103743732	8.30792	37.4757	33.3988	ENSMUSG00000032621	Srek1	UTR3
1	136280484	136280735	8.29613	52.9963	48.6573	ENSMUSG00000041570	Camsap2	Exon13
6	83051359	83051576	8.29613	52.9963	48.6573	ENSMUSG00000068329	Htra2	LastExon
6	83051359	83051576	8.29613	52.9963	48.6573	ENSMUSG00000000693	Loxl3	UTR3
12	41451792	41452249	8.29468	25.1788	21.3773	ENSMUSG00000056899	Immp2l	Intron4
12	41451792	41452249	8.29468	25.1788	21.3773	ENSMUSG00000036295	Lrrn3	UTR3
12	16984634	16984988	8.29468	25.1788	21.3773	ENSMUSG00000020580	Rock2	LastExon
15	58873549	58873993	8.29468	25.1788	21.3773	ENSMUSG00000037085	Trmt12	LastExon
16	97950414	97950858	8.29468	25.1788	21.3773	ENSMUSG00000046962	Zbtb21	LastExon
2	114196042	114196621	8.29468	25.1788	21.3773	ENSMUSG00000040321	Zfp770	LastExon
17	31114235	31114405	8.27275	84.5377	79.8125	ENSMUSG00000024030	Abcg1	LastExon
11	101433511	101433879	8.27114	30.9532	27.0133	ENSMUSG00000035007	Rundc1	LastExon
5	31206082	31206444	8.26861	50.7253	46.4221	ENSMUSG00000029147	Ppm1g	Exon5
3	96629927	96630026	8.26861	50.7253	46.4221	ENSMUSG00000038374	Rbm8a	UTR5
X	103749901	103749996	8.26557	16.8881	12.8191	ENSMUSG00000033965	Slc16a2	Intron1
11	75771396	75772014	8.26212	96.2532	91.4112	ENSMUSG00000020848	Doc2b	UTR3
4	138216642	138216740	8.25972	56.5766	52.185	ENSMUSG00000028759	Hp1bp3	UTR5
9	22051879	22051996	8.25629	36.7706	32.7079	ENSMUSG00000003410	Elavl3	UTR5
9	22051879	22051996	8.25629	36.7706	32.7079	ENSMUSG00000111842	Gm49318	Intron3
10	99109904	99110529	8.25264	62.431	57.9593	ENSMUSG00000090035	Galnt4	LastExon
10	99109904	99110529	8.25264	62.431	57.9593	ENSMUSG00000019952	Poc1b	Intron1
9	83395163	83395560	8.24608	42.6073	38.4369	ENSMUSG00000032258	Lca5	UTR3
9	40293496	40293986	8.24582	156.6	151.33	ENSMUSG00000040111	Gramd1b	UTR3
7	28268455	28269088	8.24481	60.2478	55.8047	ENSMUSG00000046058	Eid2	LastExon
8	25944691	25944920	8.23862	48.4539	44.1866	ENSMUSG00000037260	Hgsnat	UTR3
17	25375141	25375906	8.23809	80.0031	75.3229	ENSMUSG00000024112	Cacna1h	LastExon
9	110573820	110574203	8.22846	60.1611	55.7193	ENSMUSG00000044791	Setd2	Exon12
16	34723149	34723476	8.22803	21.3726	17.6759	ENSMUSG00000022833	Ccdc14	LastExon
1	36525193	36525313	8.22803	21.3726	17.6759	ENSMUSG00000001138	Cnnm3	UTR3
1	24263097	24263550	8.22803	21.3726	17.6759	ENSMUSG00000026141	Col19a1	LastExon
8	111008036	111008138	8.22803	21.3726	17.6759	ENSMUSG00000033658	Ddx19b	UTR3
X	159491732	159491824	8.22803	21.3726	17.6759	ENSMUSG00000041020	Map7d2	Exon13
12	78837432	78837693	8.22803	21.3726	17.6759	ENSMUSG00000021112	Mpp5	LastExon
3	53452454	53452548	8.22803	21.3726	17.6759	ENSMUSG00000042997	Nhlrc3	LastExon
5	140337729	140338019	8.22803	21.3726	17.6759	ENSMUSG00000036639	Nudt1	LastExon
2	136083085	136083260	8.22803	21.3726	17.6759	ENSMUSG00000039913	Pak7	UTR3
16	13884565	13884657	8.22803	21.3726	17.6759	ENSMUSG00000022680	Pdxdc1	Exon3
1	34849971	34850063	8.22803	21.3726	17.6759	ENSMUSG00000026123	Plekhb2	UTR5
4	141521995	141522402	8.22803	21.3726	17.6759	ENSMUSG00000040761	Spen	Exon2
5	142732111	142732263	8.22803	21.3726	17.6759	ENSMUSG00000039477	Tnrc18	Exon22
2	75979812	75979948	8.22803	21.3726	17.6759	ENSMUSG00000075271	Ttc30a1	LastExon
7	84679307	84679399	8.22803	21.3726	17.6759	ENSMUSG00000030629	Zfand6	Intron1
14	24135265	24135533	8.22529	22.925	19.1847	ENSMUSG00000021782	Dlg5	UTR3
4	48560848	48560963	8.22529	22.925	19.1847	ENSMUSG00000039693	Msantd3	LastExon
12	100551516	100551630	8.22529	22.925	19.1847	ENSMUSG00000021180	Rps6ka5	LastExon
3	152821270	152821658	8.22529	22.925	19.1847	ENSMUSG00000039037	St6galnac5	UTR3
3	55783215	55784583	8.22508	179.822	174.433	ENSMUSG00000056947	Mab21l1	LastExon
3	55783215	55784583	8.22508	179.822	174.433	ENSMUSG00000027799	Nbea	Intron41
5	138457216	138457714	8.2176	25.0001	21.2043	ENSMUSG00000036898	Zfp157	LastExon
14	48256286	48256679	8.21684	28.6851	24.7974	ENSMUSG00000021846	Peli2	LastExon
16	32298866	32299203	8.21684	28.6851	24.7974	ENSMUSG00000014074	Rnf168	LastExon
4	129142764	129142943	8.21171	34.4989	30.4818	ENSMUSG00000001334	Fndc5	UTR3
2	117177396	117177654	8.21171	34.4989	30.4818	ENSMUSG00000027351	Spred1	LastExon
10	115390673	115391066	8.21006	112.893	107.91	ENSMUSG00000034163	Zfc3h1	Exon2
5	125017315	125018204	8.20827	40.335	36.2049	ENSMUSG00000029478	Ncor2	UTR3
2	143813502	143813772	8.20827	40.335	36.2049	ENSMUSG00000027419	Pcsk2	LastExon
13	47244476	47245100	8.20827	40.335	36.2049	ENSMUSG00000038068	Rnf144b	LastExon
13	60175434	60175703	8.20563	27.0739	23.2248	ENSMUSG00000052957	Gas1	UTR3
7	25686267	25686528	8.20395	52.0349	47.7111	ENSMUSG00000063439	B9d2	LastExon
15	78918350	78918511	8.20039	69.6081	65.0439	ENSMUSG00000116069	Gm49510	LastExon
15	78918350	78918511	8.20039	69.6081	65.0439	ENSMUSG00000116165	Pdxp	LastExon
2	82258288	82258746	8.19807	28.6358	24.7494	ENSMUSG00000070866	Zfp804a	LastExon
9	42972069	42972428	8.19357	29.6793	25.7674	ENSMUSG00000059495	Arhgef12	Exon38
19	32514267	32514944	8.19147	30.2017	26.2787	ENSMUSG00000024896	Minpp1	LastExon
10	19004466	19005171	8.18626	141.412	136.229	ENSMUSG00000019850	Tnfaip3	Exon6
16	17901921	17902061	8.18565	31.7709	27.8127	ENSMUSG00000003527	Ess2	UTR3
7	7283404	7283520	8.18527	47.6927	43.4379	ENSMUSG00000000605	Clcn4	UTR3
2	165812348	165812828	8.18233	102.504	97.606	ENSMUSG00000039671	Zmynd8	Exon15
12	40036149	40036667	8.16975	43.9097	39.7174	ENSMUSG00000047446	Arl4a	Intron2
16	64786099	64786545	8.16086	32.2268	28.2589	ENSMUSG00000047141	Zfp654	Exon8
16	4288191	4288372	8.15287	26.4178	22.5852	ENSMUSG00000005580	Adcy9	LastExon
17	34969405	34969737	8.15287	26.4178	22.5852	ENSMUSG00000091971	Hspa1a	UTR3
9	121684379	121684743	8.15287	26.4178	22.5852	ENSMUSG00000061536	Sec22c	UTR3
15	8291107	8291566	8.14927	49.1297	44.8513	ENSMUSG00000022141	Nipbl	UTR3
19	56813075	56813592	8.13347	30.5668	26.6352	ENSMUSG00000035173	Ccdc186	Exon2
15	81600925	81601491	8.12994	41.6367	37.483	ENSMUSG00000055024	Ep300	Exon2
2	65764605	65764813	8.12994	41.6367	37.483	ENSMUSG00000075318	Scn2a	LastExon
11	117762035	117762166	8.12847	34.2385	30.2263	ENSMUSG00000025571	Tnrc6c	LastExon
18	84087811	84088219	8.12459	37.9189	33.8338	ENSMUSG00000049090	Zadh2	Intergenic
9	4419731	4420305	8.1211	42.1317	37.9703	ENSMUSG00000025892	Gria4	UTR3
2	180776717	180776907	8.11869	35.7887	31.7459	ENSMUSG00000045493	Bhlhe23	LastExon
4	138895782	138895912	8.11869	35.7887	31.7459	ENSMUSG00000041161	Otud3	LastExon
5	147078557	147078960	8.11869	35.7887	31.7459	ENSMUSG00000029642	Polr1d	Intron1
4	45399623	45399776	8.11869	35.7887	31.7459	ENSMUSG00000045973	Slc25a51	LastExon
10	81210523	81210615	8.11279	21.1371	17.4499	ENSMUSG00000034958	Atcay	Exon9
2	180981887	180982098	8.11256	59.0144	54.588	ENSMUSG00000027575	Arfgap1	LastExon
18	61307305	61307686	8.11177	51.0782	46.7695	ENSMUSG00000033871	Ppargc1b	Exon8
10	99107974	99108294	8.10829	66.3951	61.8712	ENSMUSG00000090035	Galnt4	Intergenic
10	99107974	99108294	8.10829	66.3951	61.8712	ENSMUSG00000019952	Poc1b	Intron1
5	44045518	44045629	8.10815	170.049	164.71	ENSMUSG00000029086	Prom1	Exon6
5	116013749	116014208	8.10402	103.909	98.9975	ENSMUSG00000029513	Prkab1	UTR3
10	77418094	77418187	8.10234	29.9544	26.0373	ENSMUSG00000020262	Adarb1	UTR5
7	68226233	68226387	8.10234	29.9544	26.0373	ENSMUSG00000005533	Igf1r	LastExon
9	50607076	50607195	8.10234	29.9544	26.0373	ENSMUSG00000059820	Nkapd1	UTR3
8	48228150	48228959	8.10234	29.9544	26.0373	ENSMUSG00000031561	Tenm3	UTR3
8	88257229	88257463	8.1006	45.219	41.0046	ENSMUSG00000036779	Papd5	LastExon
11	95491848	95492251	8.10009	280.859	275.006	ENSMUSG00000057522	Spop	UTR3
4	8866379	8866732	8.09908	91.179	86.3851	ENSMUSG00000041235	Chd7	LastExon
10	128806250	128806559	8.08576	39.3632	35.2511	ENSMUSG00000025354	Dnajc14	Exon2
15	103537842	103537971	8.08576	39.3632	35.2511	ENSMUSG00000022490	Ppp1r1a	Exon1
2	129810583	129811193	8.08225	169.128	163.794	ENSMUSG00000037885	Stk35	LastIntron
5	72642581	72642759	8.08155	129.025	123.924	ENSMUSG00000067220	Cnga1	UTR5
8	4206680	4206938	8.07629	73.5874	68.9766	ENSMUSG00000011832	Evi5l	UTR3
2	128851515	128851811	8.07477	25.7047	21.891	ENSMUSG00000014353	Tmem87b	UTR3
14	52237284	52237571	8.07006	21.5611	17.8587	ENSMUSG00000053754	Chd8	Exon2
12	110873766	110873896	8.0693	21.0479	17.3621	ENSMUSG00000021276	Cinp	UTR3
11	60441991	60442119	8.06507	33.5147	29.5187	ENSMUSG00000018415	Gid4	LastExon
7	128694290	128694537	8.06507	33.5147	29.5187	ENSMUSG00000042105	Inpp5f	LastExon
3	84190826	84191173	8.06281	77.1853	72.5346	ENSMUSG00000027993	Trim2	Exon6
11	69404472	69404661	8.05588	52.3978	48.0681	ENSMUSG00000018476	Kdm6b	Exon11
17	35220278	35220409	8.05191	71.3202	66.7357	ENSMUSG00000042419	Nfkbil1	UTR3
7	25005799	25005918	8.04524	203.79	198.286	ENSMUSG00000040907	Atp1a3	UTR5
17	5342071	5343179	8.03898	65.4545	60.9431	ENSMUSG00000069729	Arid1b	LastExon
11	31665484	31665760	8.03898	65.4545	60.9431	ENSMUSG00000044502	Bod1	UTR3
12	76577793	76578483	8.03832	37.0954	33.0262	ENSMUSG00000052609	Plekhg3	LastExon
12	4880525	4880647	8.03424	27.6818	23.8182	ENSMUSG00000020634	Ubxn2a	UTR3
11	78023032	78023422	8.02662	52.2578	47.9306	ENSMUSG00000037791	Phf12	Exon9
8	24060492	24060709	8.02232	29.7308	25.8179	ENSMUSG00000037492	Zmat4	UTR3
5	44176780	44177144	8.00872	85.7189	80.9824	ENSMUSG00000046985	Tapt1	UTR3
4	34811074	34811698	8.0082	25.542	21.7327	ENSMUSG00000039967	Zfp292	LastExon
1	139248143	139249045	8.00445	98.7865	93.9218	ENSMUSG00000063681	Crb1	Exon5
2	180687553	180687778	8.00438	76.2523	71.6114	ENSMUSG00000038914	Dido1	Exon4
15	99470164	99470558	8.00393	31.24	27.2944	ENSMUSG00000037525	Bcdin3d	LastExon
19	56813075	56813592	8.00393	31.24	27.2944	ENSMUSG00000035173	Ccdc186	Exon2
8	123859094	123859200	8.00393	31.24	27.2944	ENSMUSG00000031971	Ccsap	Exon2
9	62796978	62797587	8.00393	31.24	27.2944	ENSMUSG00000032244	Fem1b	LastExon
8	123859094	123859200	8.00393	31.24	27.2944	ENSMUSG00000092329	Gm20388	Intron1
2	28552103	28552605	8.00393	31.24	27.2944	ENSMUSG00000026821	Ralgds	LastExon
4	155010897	155011017	8.00031	89.3201	84.5464	ENSMUSG00000029055	Plch2	Intron1
8	84661505	84662058	7.9954	44.2615	40.0637	ENSMUSG00000053560	Ier2	UTR3
9	21067523	21067812	7.9911	57.3188	52.9162	ENSMUSG00000079677	Fdx1l	LastExon
9	21067523	21067812	7.9911	57.3188	52.9162	ENSMUSG00000111497	Gm38431	UTR3
9	21067523	21067812	7.9911	57.3188	52.9162	ENSMUSG00000111692	Gm49373	UTR3
11	62317603	62317824	7.98851	70.3854	65.8117	ENSMUSG00000018501	Ncor1	UTR3
11	53402433	53402568	7.98678	83.4543	78.7395	ENSMUSG00000049470	Aff4	Exon12
10	5021119	5021900	7.98511	110.643	105.676	ENSMUSG00000096054	Syne1	UTR3
5	35281250	35281409	7.98337	21.8883	18.1769	ENSMUSG00000045318	Adra2c	LastExon
14	59569427	59569564	7.98337	21.8883	18.1769	ENSMUSG00000021982	Cdadc1	Intron8
1	180150167	180150259	7.98337	21.8883	18.1769	ENSMUSG00000026490	Cdc42bpa	Exon33
8	122305338	122305434	7.98337	21.8883	18.1769	ENSMUSG00000092329	Gm20388	Intron1
8	122335628	122336010	7.98337	21.8883	18.1769	ENSMUSG00000092329	Gm20388	Intron1
6	134869229	134869478	7.98337	21.8883	18.1769	ENSMUSG00000032641	Gpr19	LastExon
4	140144854	140144947	7.98337	21.8883	18.1769	ENSMUSG00000040972	Igsf21	Intron2
7	44828533	44828845	7.98337	21.8883	18.1769	ENSMUSG00000074141	Il4i1	Intron1
7	44828533	44828845	7.98337	21.8883	18.1769	ENSMUSG00000109511	Nup62	UTR5
14	55548519	55548895	7.98337	21.8883	18.1769	ENSMUSG00000040618	Pck2	LastExon
8	122335628	122336010	7.98337	21.8883	18.1769	ENSMUSG00000049577	Zfpm1	LastExon
8	122305338	122305434	7.98337	21.8883	18.1769	ENSMUSG00000049577	Zfpm1	Exon2
6	90381804	90382275	7.98337	21.8883	18.1769	ENSMUSG00000034430	Zxdc	LastExon
8	111056906	111057549	7.98108	34.8141	30.791	ENSMUSG00000031960	Aars	UTR3
2	172377910	172378007	7.98108	34.8141	30.791	ENSMUSG00000027498	Cstf1	Exon5
8	111056906	111057549	7.98108	34.8141	30.791	ENSMUSG00000109941	Exosc6	LastExon
12	41452832	41452997	7.98108	34.8141	30.791	ENSMUSG00000056899	Immp2l	Intron4
12	41452832	41452997	7.98108	34.8141	30.791	ENSMUSG00000036295	Lrrn3	LastExon
8	72483357	72483883	7.98108	34.8141	30.791	ENSMUSG00000019731	Slc35e1	UTR3
7	99858809	99858905	7.98017	47.8547	43.5972	ENSMUSG00000035227	Spcs2	Exon1
7	16117629	16117919	7.96586	37.8866	33.8021	ENSMUSG00000006024	Napa	UTR3
13	21445519	21445813	7.96392	124.002	118.938	ENSMUSG00000022228	Zscan26	LastExon
1	36103619	36104499	7.96325	38.398	34.3034	ENSMUSG00000045216	Hs6st1	LastExon
3	55116995	55117153	7.96325	38.398	34.3034	ENSMUSG00000036580	Spg20	Exon2
17	70990472	70990564	7.96261	20.322	16.6565	ENSMUSG00000117098	AC154187.2	Intron1
16	85899225	85899347	7.96261	20.322	16.6565	ENSMUSG00000022894	Adamts5	Exon1
5	52376145	52376537	7.96261	20.322	16.6565	ENSMUSG00000045790	Ccdc149	UTR3
2	66022594	66022708	7.96261	20.322	16.6565	ENSMUSG00000044647	Csrnp3	LastExon
19	43848142	43848300	7.96261	20.322	16.6565	ENSMUSG00000025195	Dnmbp	LastExon
12	84172823	84172989	7.96261	20.322	16.6565	ENSMUSG00000042507	Elmsan1	Exon2
1	163386291	163386568	7.96261	20.322	16.6565	ENSMUSG00000040124	Gorab	UTR3
2	73343615	73343723	7.96261	20.322	16.6565	ENSMUSG00000041762	Gpr155	LastExon
18	36505829	36505992	7.96261	20.322	16.6565	ENSMUSG00000024486	Hbegf	UTR3
13	48264172	48264269	7.96261	20.322	16.6565	ENSMUSG00000021379	Id4	UTR3
11	59455321	59455941	7.96261	20.322	16.6565	ENSMUSG00000036819	Jmjd4	LastExon
6	93677698	93677808	7.96261	20.322	16.6565	ENSMUSG00000045095	Magi1	UTR3
7	67316878	67316992	7.96261	20.322	16.6565	ENSMUSG00000030557	Mef2a	UTR5
17	70990472	70990564	7.96261	20.322	16.6565	ENSMUSG00000034868	Myl12b	UTR5
X	101320780	101320915	7.96261	20.322	16.6565	ENSMUSG00000031302	Nlgn3	UTR3
10	67267311	67267495	7.96261	20.322	16.6565	ENSMUSG00000075000	Nrbf2	UTR3
4	134278447	134279074	7.96261	20.322	16.6565	ENSMUSG00000050890	Pdik1l	LastExon
4	155221595	155221692	7.96261	20.322	16.6565	ENSMUSG00000029050	Ski	Exon1
19	38917828	38918041	7.96261	20.322	16.6565	ENSMUSG00000048720	Tbc1d12	LastExon
17	81001034	81001344	7.96261	20.322	16.6565	ENSMUSG00000024245	Tmem178	LastExon
2	37428581	37428979	7.96261	20.322	16.6565	ENSMUSG00000066798	Zbtb6	UTR3
12	110855392	110855576	7.96261	20.322	16.6565	ENSMUSG00000021271	Zfp839	Exon2
11	65828260	65828625	7.96261	20.322	16.6565	ENSMUSG00000018347	Zkscan6	LastExon
8	121882404	121882548	7.96208	28.5262	24.6419	ENSMUSG00000092329	Gm20388	Intron1
8	121882404	121882548	7.96208	28.5262	24.6419	ENSMUSG00000040010	Slc7a5	UTR3
7	25009938	25010376	7.95705	84.7919	80.0635	ENSMUSG00000003378	Grik5	UTR3
15	8218639	8219059	7.95402	25.4091	21.6026	ENSMUSG00000039801	Cplane1	Exon27
16	3749410	3749700	7.95113	36.2746	32.222	ENSMUSG00000022529	Zfp263	LastExon
2	28833671	28833952	7.94894	41.9881	37.8289	ENSMUSG00000035666	Gtf3c4	Exon3
8	111134738	111134945	7.94894	41.9881	37.8289	ENSMUSG00000033624	Pdpr	LastExon
9	56937915	56938258	7.94638	35.2196	31.1874	ENSMUSG00000032288	Imp3	LastExon
1	144001497	144001798	7.94638	35.2196	31.1874	ENSMUSG00000026360	Rgs2	UTR3
17	33917673	33918777	7.94596	75.3224	70.6919	ENSMUSG00000051390	Zbtb22	LastExon
7	40929425	40929645	7.93962	78.9249	74.2563	ENSMUSG00000039257	Vstm2b	LastExon
2	32707578	32707977	7.93721	45.5825	41.3626	ENSMUSG00000009555	Cdk9	LastExon
11	90248896	90249081	7.93491	24.336	20.5584	ENSMUSG00000110344	Gm45716	UTR3
14	110749588	110750347	7.93491	24.336	20.5584	ENSMUSG00000045871	Slitrk6	UTR3
18	36794252	36794372	7.93389	82.5279	77.8226	ENSMUSG00000001383	Zmat2	Exon2
2	91710458	91710554	7.93354	28.9645	25.0697	ENSMUSG00000027244	Atg13	UTR5
4	86576018	86576276	7.9327	119.482	114.45	ENSMUSG00000070934	Rraga	LastExon
9	78478557	78478668	7.92746	200.573	195.083	ENSMUSG00000037742	Eef1a1	UTR3
16	75757728	75758292	7.92628	23.2929	19.5423	ENSMUSG00000032932	Hspa13	UTR3
14	21669591	21669717	7.9249	39.2975	35.1864	ENSMUSG00000021767	Kat6b	LastExon
10	67226641	67226826	7.9239	89.7347	84.9564	ENSMUSG00000037876	Jmjd1c	Exon9
8	25983126	25983431	7.9216	22.7722	19.0362	ENSMUSG00000037251	Pomk	LastExon
15	86452861	86453308	7.9216	22.7722	19.0362	ENSMUSG00000051864	Tbc1d22a	LastIntron
7	63757383	63757578	7.92044	30.4766	26.5477	ENSMUSG00000033510	Otud7a	LastExon
7	27364115	27364577	7.91953	93.3383	88.5233	ENSMUSG00000011751	Sptbn4	Exon31
15	25971798	25972039	7.91911	52.7791	48.4431	ENSMUSG00000022270	Retreg1	LastExon
3	108391922	108392240	7.91843	32.5383	28.5641	ENSMUSG00000068740	Celsr2	UTR3
4	154964140	154964271	7.91843	32.5383	28.5641	ENSMUSG00000029056	Pank4	UTR5
18	14626763	14627054	7.91843	32.5383	28.5641	ENSMUSG00000037013	Ss18	UTR3
15	31616946	31617397	7.90584	21.2149	17.5245	ENSMUSG00000039065	Fam173b	LastExon
14	34414397	34414613	7.9058	59.9818	55.5425	ENSMUSG00000021796	Bmpr1a	UTR3
18	46505035	46505431	7.9058	59.9818	55.5425	ENSMUSG00000033319	Fem1c	UTR3
19	24099462	24099569	7.89765	39.7141	35.5953	ENSMUSG00000024812	Tjp2	Exon21
5	143245751	143245974	7.89765	39.7141	35.5953	ENSMUSG00000029587	Zfp12	LastExon
16	91615708	91616031	7.89739	27.3211	23.4661	ENSMUSG00000039763	Dnajc28	UTR3
19	3814242	3814819	7.8956	67.1878	62.6544	ENSMUSG00000045098	Kmt5b	LastExon
7	35202053	35202487	7.8956	67.1878	62.6544	ENSMUSG00000001802	Lrp3	UTR3
4	155739939	155740247	7.88828	26.2711	22.4426	ENSMUSG00000084845	Tmem240	LastExon
9	45808507	45808792	7.88566	52.0955	47.7707	ENSMUSG00000043987	Cep164	Intron3
15	72808368	72809457	7.88495	110.661	105.694	ENSMUSG00000047921	Trappc9	LastIntron
16	8830150	8830594	7.8841	77.9999	73.3405	ENSMUSG00000022507	1810013L24Rik	UTR5
1	136270489	136271062	7.88403	46.9082	42.666	ENSMUSG00000041570	Camsap2	UTR3
2	160965276	160965611	7.88403	46.9082	42.666	ENSMUSG00000057133	Chd6	Exon31
6	113604745	113604858	7.87883	50.5087	46.2081	ENSMUSG00000033940	Brk1	UTR5
10	81326053	81326196	7.87828	25.2223	21.4199	ENSMUSG00000034889	Cactin	UTR3
9	44296007	44296478	7.87828	25.2223	21.4199	ENSMUSG00000032119	Hinfp	UTR3
3	95659765	95659981	7.8744	54.1106	49.7546	ENSMUSG00000038612	Mcl1	Exon2
11	23490480	23490586	7.87254	21.6491	17.9447	ENSMUSG00000020288	Ahsa2	LastExon
11	23490480	23490586	7.87254	21.6491	17.9447	ENSMUSG00000056342	Usp34	UTR3
14	75323250	75323465	7.87058	57.7136	53.3059	ENSMUSG00000022000	Zc3h13	Exon10
18	65934667	65935006	7.86232	114.048	109.055	ENSMUSG00000024518	Rax	UTR3
10	69210157	69210506	7.86171	68.5261	63.9759	ENSMUSG00000090622	A930033H14Rik	UTR3
19	29025718	29025863	7.86171	68.5261	63.9759	ENSMUSG00000024782	Ak3	LastIntron
17	47601315	47601610	7.85812	23.1365	19.3908	ENSMUSG00000023988	Bysl	UTR3
18	77948308	77948468	7.85812	23.1365	19.3908	ENSMUSG00000039840	Epg5	Exon2
14	8222640	8222941	7.85812	23.1365	19.3908	ENSMUSG00000021752	Kctd6	LastExon
9	35275267	35275652	7.85812	23.1365	19.3908	ENSMUSG00000032044	Rpusd4	LastExon
9	41965077	41965417	7.85812	23.1365	19.3908	ENSMUSG00000049313	Sorl1	UTR3
11	77453529	77453747	7.85812	23.1365	19.3908	ENSMUSG00000037926	Ssh2	LastExon
11	84042051	84042184	7.85812	23.1365	19.3908	ENSMUSG00000034940	Synrg	UTR3
4	34808313	34808525	7.85519	28.7461	24.8565	ENSMUSG00000039967	Zfp292	LastExon
15	77764345	77764595	7.85505	23.1295	19.3842	ENSMUSG00000022443	Myh9	Intron36
2	18027775	18028061	7.85164	26.6882	22.8496	ENSMUSG00000054057	A930004D18Rik	UTR5
16	4418018	4418160	7.85164	26.6882	22.8496	ENSMUSG00000005580	Adcy9	Exon3
11	101766869	101767187	7.85164	26.6882	22.8496	ENSMUSG00000034931	Dhx8	UTR3
14	54856588	54856881	7.85164	26.6882	22.8496	ENSMUSG00000057156	Homez	UTR3
1	184898496	184898889	7.85164	26.6882	22.8496	ENSMUSG00000026620	Mark1	UTR3
1	79777972	79778116	7.85164	26.6882	22.8496	ENSMUSG00000026248	Mrpl44	Exon2
19	28964846	28965192	7.85164	26.6882	22.8496	ENSMUSG00000040105	Plpp6	LastExon
12	76575974	76576501	7.84699	30.2615	26.3364	ENSMUSG00000052609	Plekhg3	Exon4
7	127882708	127882904	7.84699	30.2615	26.3364	ENSMUSG00000049739	Zfp646	LastExon
17	35989196	35989383	7.84348	33.8469	29.8427	ENSMUSG00000024429	Gnl1	UTR3
16	90499087	90499185	7.84348	33.8469	29.8427	ENSMUSG00000053414	Hunk	UTR3
9	57414165	57414425	7.84348	33.8469	29.8427	ENSMUSG00000063849	Ppcdc	UTR3
5	36954511	36954740	7.84074	37.4393	33.3629	ENSMUSG00000029120	Ppp2r2c	UTR3
17	3196935	3197432	7.84074	37.4393	33.3629	ENSMUSG00000046201	Scaf8	LastExon
6	13582991	13583201	7.84074	37.4393	33.3629	ENSMUSG00000029569	Tmem168	LastExon
12	69372810	69373365	7.83854	41.0363	36.893	ENSMUSG00000044147	Arf6	LastExon
1	182895210	182895425	7.83854	41.0363	36.893	ENSMUSG00000038576	Susd4	LastExon
15	98844805	98845107	7.83326	42.0455	37.8851	ENSMUSG00000048154	Kmt2d	Exon40
17	56259215	56259775	7.82773	26.1156	22.2914	ENSMUSG00000043683	Fem1a	UTR3
6	82774222	82774424	7.82727	87.8957	83.1372	ENSMUSG00000000628	Hk2	UTR5
4	148055902	148056048	7.82621	21.0457	17.36	ENSMUSG00000029009	Mthfr	UTR3
9	22011443	22011758	7.82355	149.186	143.958	ENSMUSG00000003402	Prkcsh	Intron11
11	51815068	51815522	7.809	20.0087	16.3544	ENSMUSG00000020387	Jade2	UTR3
9	122166502	122167037	7.80514	100.059	95.1823	ENSMUSG00000038145	Snrk	LastExon
11	89039872	89040909	7.80405	92.8471	88.0367	ENSMUSG00000000276	Dgke	UTR3
11	51685606	51685990	7.79939	71.2083	66.6252	ENSMUSG00000007777	0610009B22Rik	UTR3
11	54866439	54866549	7.79831	67.6017	63.0629	ENSMUSG00000020267	Hint1	UTR5
2	18675821	18675936	7.79709	63.9951	59.5033	ENSMUSG00000051154	Commd3	LastExon
7	4993805	4993948	7.79416	56.7825	52.3876	ENSMUSG00000051550	Zfp579	LastExon
14	65075624	65076206	7.79031	49.5714	45.2859	ENSMUSG00000021978	Extl3	Exon3
9	110246321	110247346	7.78543	105.007	100.087	ENSMUSG00000032482	Cspg5	Exon2
4	118363187	118363346	7.78499	42.3636	38.1974	ENSMUSG00000033253	Szt2	UTR3
8	84661505	84662058	7.78151	38.7622	34.6604	ENSMUSG00000053560	Ier2	UTR3
3	41613230	41613980	7.78151	38.7622	34.6604	ENSMUSG00000025764	Jade1	LastExon
11	4787485	4787585	7.78151	38.7622	34.6604	ENSMUSG00000009073	Nf2	Exon13
X	8894280	8894412	7.77722	35.1637	31.1323	ENSMUSG00000052364	B630019K06Rik	UTR3
5	107510443	107510731	7.77722	35.1637	31.1323	ENSMUSG00000111375	Btbd8	LastExon
5	107510443	107510731	7.77722	35.1637	31.1323	ENSMUSG00000106631	Gm42669	Intron1
3	88908157	88908353	7.77722	35.1637	31.1323	ENSMUSG00000054199	Gon4l	Exon30
2	156308018	156308182	7.77722	35.1637	31.1323	ENSMUSG00000038116	Phf20	UTR3
13	101684174	101684479	7.77722	35.1637	31.1323	ENSMUSG00000041417	Pik3r1	UTR3
9	46281217	46281575	7.77722	35.1637	31.1323	ENSMUSG00000032078	Zpr1	UTR3
13	54052670	54052812	7.77662	22.445	18.7185	ENSMUSG00000021478	Drd1	UTR3
6	54506042	54506168	7.7739	34.6411	30.6209	ENSMUSG00000019124	Scrn1	UTR3
17	34972051	34972160	7.7718	31.5698	27.6157	ENSMUSG00000092609	Gm20481	LastExon
17	34972051	34972160	7.7718	31.5698	27.6157	ENSMUSG00000091971	Hspa1a	UTR5
4	135451867	135452316	7.76877	38.2027	34.1125	ENSMUSG00000028803	Nipal3	UTR3
7	73429199	73429340	7.76509	65.3371	60.8275	ENSMUSG00000078671	Chd2	UTR3
14	93890556	93890668	7.76474	27.9837	24.112	ENSMUSG00000055421	Pcdh9	UTR5
6	48063664	48063918	7.76474	27.9837	24.112	ENSMUSG00000057691	Zfp746	UTR3
18	84095002	84095442	7.76203	29.502	25.5943	ENSMUSG00000049090	Zadh2	LastExon
15	91148602	91149127	7.76049	25.4356	21.6285	ENSMUSG00000055782	Abcd2	UTR3
15	93244701	93245068	7.75517	24.411	20.6304	ENSMUSG00000036197	Gxylt1	UTR3
8	71968331	71968712	7.75517	24.411	20.6304	ENSMUSG00000052446	Zfp961	LastExon
6	39574435	39574553	7.75251	24.9097	21.1163	ENSMUSG00000046947	Adck2	Exon1
1	181177518	181177807	7.74305	47.3013	43.0529	ENSMUSG00000038733	Wdr26	UTR3
8	105291646	105291752	7.74145	20.8645	17.1838	ENSMUSG00000043251	Exoc3l	Intron9
18	68267861	68267992	7.74145	20.8645	17.1838	ENSMUSG00000038121	Fam210a	UTR3
5	125389696	125389955	7.74145	20.8645	17.1838	ENSMUSG00000072612	Gm10382	LastExon
11	105179905	105180310	7.74145	20.8645	17.1838	ENSMUSG00000020694	Tlk2	Intron1
5	125389696	125389955	7.74145	20.8645	17.1838	ENSMUSG00000008348	Ubc	UTR5
4	119136761	119137264	7.74003	146.473	141.26	ENSMUSG00000028645	Slc2a1	UTR3
16	90496544	90496991	7.73751	20.3583	16.6916	ENSMUSG00000053414	Hunk	LastExon
3	108426634	108426990	7.73352	74.8484	70.2236	ENSMUSG00000068739	Sars	UTR3
6	113151148	113151672	7.73277	30.9404	27.001	ENSMUSG00000034269	Setd5	LastExon
3	108679470	108679741	7.72886	128.444	123.346	ENSMUSG00000027883	Gpsm2	UTR3
8	123269011	123269167	7.72814	40.0904	35.9647	ENSMUSG00000032815	Fanca	Intron40
8	123269011	123269167	7.72814	40.0904	35.9647	ENSMUSG00000092329	Gm20388	Intron1
13	58215331	58215565	7.72814	40.0904	35.9647	ENSMUSG00000005312	Ubqln1	Exon1
8	123269011	123269167	7.72814	40.0904	35.9647	ENSMUSG00000001065	Zfp276	LastExon
19	18717246	18717541	7.72605	26.8639	23.0206	ENSMUSG00000047044	D030056L22Rik	LastExon
2	18674918	18675010	7.719	29.8835	25.9677	ENSMUSG00000051154	Commd3	Exon8
6	116406058	116406260	7.71823	36.4873	32.4297	ENSMUSG00000025702	2020-03-08	LastExon
10	41528773	41528918	7.71823	36.4873	32.4297	ENSMUSG00000019818	Cd164	LastExon
7	66125337	66125663	7.71823	36.4873	32.4297	ENSMUSG00000032640	Chsy1	Exon2
5	113742677	113742920	7.7179	26.3366	22.5067	ENSMUSG00000018974	Sart3	UTR3
8	48236415	48236530	7.71637	22.8088	19.0721	ENSMUSG00000031561	Tenm3	Exon27
11	101097957	101098374	7.71579	57.3752	52.972	ENSMUSG00000017802	Retreg3	LastExon
8	72305142	72305234	7.71035	52.2472	47.9202	ENSMUSG00000070713	Gm10282	LastExon
4	116306773	116307931	7.70885	87.4161	82.6623	ENSMUSG00000003810	Mast2	UTR3
3	88985370	88985737	7.70178	48.6389	44.3687	ENSMUSG00000028053	Ash1l	Exon3
9	108746895	108747060	7.70127	115.369	110.367	ENSMUSG00000032601	Prkar2a	LastExon
13	58381791	58381906	7.69719	19.2856	15.6521	ENSMUSG00000021550	2210016F16Rik	LastExon
3	89715059	89715151	7.69719	19.2856	15.6521	ENSMUSG00000027951	Adar	UTR5
3	122014355	122014576	7.69719	19.2856	15.6521	ENSMUSG00000039831	Arhgap29	LastExon
5	131439293	131439523	7.69719	19.2856	15.6521	ENSMUSG00000029673	Auts2	LastExon
10	111299298	111299451	7.69719	19.2856	15.6521	ENSMUSG00000035759	Bbs10	LastExon
1	158245810	158246116	7.69719	19.2856	15.6521	ENSMUSG00000004031	Brinp2	UTR3
6	106799990	106800082	7.69719	19.2856	15.6521	ENSMUSG00000005362	Crbn	LastExon
2	66022018	66022362	7.69719	19.2856	15.6521	ENSMUSG00000044647	Csrnp3	LastExon
3	88949867	88949959	7.69719	19.2856	15.6521	ENSMUSG00000068921	Dap3	Exon1
11	45004800	45004923	7.69719	19.2856	15.6521	ENSMUSG00000057098	Ebf1	UTR3
9	14357489	14357852	7.69719	19.2856	15.6521	ENSMUSG00000037419	Endod1	LastExon
5	84331538	84331794	7.69719	19.2856	15.6521	ENSMUSG00000029245	Epha5	Exon3
2	140660508	140660768	7.69719	19.2856	15.6521	ENSMUSG00000051379	Flrt3	LastExon
4	149238027	149238173	7.69719	19.2856	15.6521	ENSMUSG00000063077	Kif1b	Intron22
18	65999287	65999530	7.69719	19.2856	15.6521	ENSMUSG00000041891	Lman1	Intron1
2	140660508	140660768	7.69719	19.2856	15.6521	ENSMUSG00000068205	Macrod2	Intron3
8	125672199	125672506	7.69719	19.2856	15.6521	ENSMUSG00000050930	Map10	LastExon
12	24959033	24959276	7.69719	19.2856	15.6521	ENSMUSG00000020646	Mboat2	LastExon
8	79281252	79281416	7.69719	19.2856	15.6521	ENSMUSG00000037022	Mmaa	Exon2
7	64337751	64338103	7.69719	19.2856	15.6521	ENSMUSG00000030522	Mtmr10	LastExon
15	25813444	25813559	7.69719	19.2856	15.6521	ENSMUSG00000022272	Myo10	UTR3
5	121439870	121440277	7.69719	19.2856	15.6521	ENSMUSG00000042719	Naa25	LastExon
7	19724318	19724500	7.69719	19.2856	15.6521	ENSMUSG00000062300	Nectin2	Intron5
12	44311347	44311574	7.69719	19.2856	15.6521	ENSMUSG00000036257	Pnpla8	LastExon
3	69554176	69554507	7.69719	19.2856	15.6521	ENSMUSG00000027784	Ppm1l	UTR3
12	75515599	75515779	7.69719	19.2856	15.6521	ENSMUSG00000021051	Ppp2r5e	Exon3
8	33386352	33387384	7.69719	19.2856	15.6521	ENSMUSG00000049184	Purg	Exon1
5	3590253	3590584	7.69719	19.2856	15.6521	ENSMUSG00000040302	Rbm48	Exon4
12	83137457	83137549	7.69719	19.2856	15.6521	ENSMUSG00000021219	Rgs6	LastIntron
12	74266797	74266910	7.69719	19.2856	15.6521	ENSMUSG00000044912	Syt16	LastExon
15	27732296	27732807	7.69719	19.2856	15.6521	ENSMUSG00000022263	Trio	UTR3
11	118261077	118261188	7.69719	19.2856	15.6521	ENSMUSG00000033909	Usp36	UTR3
5	139473145	139473428	7.69719	19.2856	15.6521	ENSMUSG00000053581	Zfand2a	UTR3
3	5411817	5411939	7.69719	19.2856	15.6521	ENSMUSG00000025255	Zfhx4	LastExon
7	12970514	12970769	7.69719	19.2856	15.6521	ENSMUSG00000004500	Zfp324	UTR3
16	3866422	3866639	7.69719	19.2856	15.6521	ENSMUSG00000039789	Zfp597	LastExon
2	35720361	35720550	7.69173	45.0308	40.8198	ENSMUSG00000026883	Dab2ip	UTR3
13	46693699	46693996	7.69173	45.0308	40.8198	ENSMUSG00000021374	Nup153	Exon16
14	79428220	79428777	7.69112	24.7559	20.9659	ENSMUSG00000043881	Kbtbd7	LastExon
8	111710592	111710745	7.69005	29.2917	25.3891	ENSMUSG00000031955	Bcar1	UTR3
11	29503918	29504276	7.69005	29.2917	25.3891	ENSMUSG00000032740	Ccdc88a	Exon30
10	58270029	58270321	7.69005	29.2917	25.3891	ENSMUSG00000038039	Gcc2	Exon6
19	4889226	4889533	7.68833	37.3951	33.3196	ENSMUSG00000006464	Bbs1	UTR3
16	20692364	20692586	7.68677	132.501	127.376	ENSMUSG00000045983	Eif4g1	LastExon
4	138439000	138439334	7.67979	41.4233	37.2731	ENSMUSG00000041241	Mul1	LastExon
15	81650209	81650380	7.67705	55.1262	50.7554	ENSMUSG00000055024	Ep300	LastExon
17	23575906	23576040	7.67462	53.5891	49.241	ENSMUSG00000062012	Zfp13	UTR3
10	81318720	81319005	7.67146	75.9232	71.2861	ENSMUSG00000034902	Pip5k1c	UTR3
4	147941567	147942003	7.66905	25.7045	21.8909	ENSMUSG00000044496	2510039O18Rik	Exon1
18	40205553	40205675	7.66905	25.7045	21.8909	ENSMUSG00000024487	Yipf5	UTR3
18	67206355	67206471	7.66537	37.8167	33.733	ENSMUSG00000109901	Chmp1b	UTR3
X	100816565	100816737	7.66537	37.8167	33.733	ENSMUSG00000000881	Dlg3	LastExon
18	67206355	67206471	7.66537	37.8167	33.733	ENSMUSG00000024524	Gnal	Intron5
5	35392391	35392781	7.66365	49.9794	45.6872	ENSMUSG00000067438	Hmx1	UTR3
13	63511559	63511698	7.66365	49.9794	45.6872	ENSMUSG00000021466	Ptch1	UTR3
3	104769805	104770752	7.66122	98.6841	93.8206	ENSMUSG00000055865	Fam19a3	UTR3
2	101697202	101697563	7.65878	20.1924	16.5316	ENSMUSG00000027164	Traf6	LastExon
2	5298683	5299048	7.65268	58.5435	54.1233	ENSMUSG00000039145	Camk1d	UTR3
13	99900521	99900652	7.65087	46.3697	42.1361	ENSMUSG00000021647	Cartpt	Exon1
3	27241203	27241498	7.64471	28.1521	24.2768	ENSMUSG00000027698	Nceh1	LastExon
13	55247406	55248010	7.64111	47.8434	43.5861	ENSMUSG00000021488	Nsd1	Exon5
11	76782135	76782285	7.63984	22.133	18.4152	ENSMUSG00000020841	Cpd	UTR3
17	6043754	6043951	7.63984	22.133	18.4152	ENSMUSG00000015659	Serac1	UTR3
2	32597241	32597383	7.63984	22.133	18.4152	ENSMUSG00000079442	St6galnac4	LastExon
13	90104399	90104619	7.63984	22.133	18.4152	ENSMUSG00000012422	Tmem167	LastExon
10	81390871	81391279	7.63649	191.565	186.116	ENSMUSG00000113262	Gm48551	UTR3
10	81390871	81391279	7.63649	191.565	186.116	ENSMUSG00000114004	Gm48552	LastExon
9	65794678	65795474	7.6358	42.7601	38.5866	ENSMUSG00000040524	Zfp609	Exon2
2	80317354	80317480	7.6305	19.1504	15.5231	ENSMUSG00000027006	Dnajc10	UTR5
10	118859502	118860394	7.62566	80.6406	75.9543	ENSMUSG00000028630	Dyrk2	UTR3
10	58478897	58479085	7.62566	80.6406	75.9543	ENSMUSG00000003226	Ranbp2	Exon20
7	122671834	122671950	7.62516	30.6095	26.6772	ENSMUSG00000066189	Cacng3	Exon1
5	147110901	147111053	7.62516	30.6095	26.6772	ENSMUSG00000029642	Polr1d	UTR3
6	145820006	145820323	7.6242	21.6012	17.8977	ENSMUSG00000030259	Rassf8	UTR3
11	6296922	6297170	7.62317	59.8902	55.4523	ENSMUSG00000020456	Ogdh	UTR5
10	58479889	58480297	7.62317	59.8902	55.4523	ENSMUSG00000003226	Ranbp2	Exon20
16	5077164	5077286	7.62317	59.8902	55.4523	ENSMUSG00000039473	Ubn1	Exon16
19	7227434	7227603	7.62208	29.5944	25.6847	ENSMUSG00000024764	Naa40	UTR3
8	121601200	121601459	7.62059	27.0802	23.2308	ENSMUSG00000092329	Gm20388	Intron1
8	121601200	121601459	7.62059	27.0802	23.2308	ENSMUSG00000061410	Zcchc14	UTR3
3	69575660	69575805	7.61774	39.1508	35.042	ENSMUSG00000043300	B3galnt1	LastExon
4	139192924	139193028	7.61774	39.1508	35.042	ENSMUSG00000028745	Capzb	UTR5
8	69707027	69707618	7.61774	39.1508	35.042	ENSMUSG00000054648	Zfp869	LastExon
X	73795610	73795916	7.61635	34.6084	30.5888	ENSMUSG00000002006	Pdzd4	LastExon
4	10990463	10990708	7.61443	63.8798	59.3898	ENSMUSG00000049969	Plekhf2	UTR3
3	108101130	108101264	7.61426	85.602	80.8664	ENSMUSG00000009108	Gnat2	LastExon
19	58132150	58132440	7.61325	47.7114	43.456	ENSMUSG00000054843	Atrnl1	UTR3
7	27357127	27357280	7.61325	47.7114	43.456	ENSMUSG00000092367	Gm20479	Intron1
7	27357127	27357280	7.61325	47.7114	43.456	ENSMUSG00000011751	Sptbn4	UTR3
8	112017971	112018545	7.60649	73.421	68.8123	ENSMUSG00000033430	Terf2ip	LastExon
7	73429621	73429897	7.60571	39.1037	34.9963	ENSMUSG00000078671	Chd2	UTR3
2	92360194	92360670	7.60362	28.536	24.6516	ENSMUSG00000058318	Phf21a	LastExon
9	22076296	22076499	7.59594	27.0122	23.164	ENSMUSG00000066839	Ecsit	Exon4
16	28162087	28162321	7.59594	27.0122	23.164	ENSMUSG00000022523	Fgf12	UTR3
14	120275693	120275842	7.59594	27.0122	23.164	ENSMUSG00000022139	Mbnl2	Exon1
9	115243454	115243807	7.59594	27.0122	23.164	ENSMUSG00000032437	Stt3b	UTR3
9	85844622	85845004	7.59594	27.0122	23.164	ENSMUSG00000035274	Tpbg	LastExon
15	66919369	66919898	7.59594	27.0122	23.164	ENSMUSG00000005124	Wisp1	LastExon
2	180775155	180775321	7.59571	35.5422	31.504	ENSMUSG00000045493	Bhlhe23	UTR3
5	30876672	30876835	7.59571	35.5422	31.504	ENSMUSG00000038828	Tmem214	LastExon
2	160949642	160950166	7.59558	44.1002	39.9048	ENSMUSG00000057133	Chd6	LastExon
10	71381331	71381815	7.59534	86.9548	82.2057	ENSMUSG00000060733	Ipmk	LastExon
5	111286260	111286434	7.59455	25.5097	21.701	ENSMUSG00000033209	Ttc28	LastExon
4	10990876	10991123	7.58997	70.7809	66.2035	ENSMUSG00000049969	Plekhf2	LastExon
7	34245020	34245147	7.58365	27.4778	23.6194	ENSMUSG00000066571	4931406P16Rik	Exon10
17	3196935	3197432	7.58365	27.4778	23.6194	ENSMUSG00000046201	Scaf8	LastExon
3	129983440	129983896	7.58365	27.4778	23.6194	ENSMUSG00000001052	Sec24b	UTR3
3	88729231	88729592	7.58315	24.9815	21.1866	ENSMUSG00000028057	Rit1	LastExon
11	16281935	16282443	7.5785	49.0556	44.7787	ENSMUSG00000048834	Vstm2a	UTR3
10	19001846	19003005	7.5774	175.362	169.995	ENSMUSG00000019850	Tnfaip3	LastExon
5	140523831	140524094	7.56884	21.9698	18.2563	ENSMUSG00000036599	Chst12	LastExon
10	13515165	13515453	7.56827	31.9351	27.973	ENSMUSG00000019810	Fuca2	UTR3
4	117849297	117849420	7.56827	31.9351	27.973	ENSMUSG00000028542	Slc6a9	Intron2
5	123530175	123530387	7.56827	31.9351	27.973	ENSMUSG00000029434	Vps33a	UTR3
13	112504122	112504960	7.56577	40.955	36.8139	ENSMUSG00000021756	Il6st	LastExon
2	181581910	181582384	7.56563	106.808	101.872	ENSMUSG00000089917	Uckl1	Intergenic
2	181581910	181582384	7.56563	106.808	101.872	ENSMUSG00000000823	Zfp512b	UTR3
13	52504530	52504661	7.56416	38.4387	34.3436	ENSMUSG00000047842	Diras2	UTR3
16	30956995	30957546	7.55869	23.9255	20.1575	ENSMUSG00000047434	Xxylt1	UTR3
19	42123577	42123705	7.55632	23.4239	19.6698	ENSMUSG00000018821	Avpi1	UTR3
15	12270007	12270139	7.55632	23.4239	19.6698	ENSMUSG00000039458	Mtmr12	LastExon
6	65704159	65704641	7.55632	44.9304	40.7212	ENSMUSG00000049001	Ndnf	LastExon
9	82871120	82871810	7.5519	39.8949	35.7729	ENSMUSG00000032253	Phip	UTR3
17	33917673	33918777	7.55097	72.5145	67.9166	ENSMUSG00000051390	Zbtb22	LastExon
5	135181207	135181394	7.54903	86.0533	81.3133	ENSMUSG00000029681	Bcl7b	UTR3
5	147546616	147546945	7.5487	18.9838	15.3607	ENSMUSG00000029647	Pan3	UTR3
10	105370259	105370426	7.5487	18.9838	15.3607	ENSMUSG00000036019	Tmtc2	Exon3
6	34487335	34487604	7.5463	50.4021	46.1031	ENSMUSG00000038871	Bpgm	UTR5
12	72236566	72236693	7.5447	63.9393	59.4484	ENSMUSG00000021087	Rtn1	Intron3
8	94779596	94779891	7.5437	77.4787	72.8252	ENSMUSG00000031778	Cx3cl1	LastExon
4	133064757	133064877	7.54364	27.863	23.9951	ENSMUSG00000037692	Ahdc1	Exon6
11	102946600	102946699	7.53921	20.918	17.2356	ENSMUSG00000045532	C1ql1	UTR5
2	49257533	49257844	7.53921	20.918	17.2356	ENSMUSG00000036792	Mbd5	Exon4
17	84185239	84185841	7.53698	68.9034	64.348	ENSMUSG00000045817	Zfp36l2	UTR3
16	8842970	8843251	7.53532	41.8305	37.6737	ENSMUSG00000022507	1810013L24Rik	Exon3
8	116982486	116982612	7.53311	28.3305	24.4503	ENSMUSG00000034424	Gcsh	UTR3
8	121789428	121789576	7.53311	28.3305	24.4503	ENSMUSG00000092329	Gm20388	Intron1
8	121789428	121789576	7.53311	28.3305	24.4503	ENSMUSG00000025318	Jph3	LastExon
7	55979252	55979655	7.53311	28.3305	24.4503	ENSMUSG00000047037	Nipa1	UTR3
9	44256687	44257118	7.53311	28.3305	24.4503	ENSMUSG00000032109	Nlrx1	Exon7
5	129550659	129550759	7.53311	28.3305	24.4503	ENSMUSG00000029439	Sfswap	Exon13
6	86120164	86120280	7.53178	22.87	19.1308	ENSMUSG00000030000	Add2	UTR3
1	136627556	136627921	7.52966	38.3045	34.212	ENSMUSG00000041483	Zfp281	LastExon
11	82765077	82765452	7.52854	105.912	100.985	ENSMUSG00000046010	Zfp830	LastExon
11	102291262	102291787	7.52638	40.2919	36.1627	ENSMUSG00000059995	Atxn7l3	UTR3
6	30213979	30214295	7.52473	46.7889	42.549	ENSMUSG00000039159	Ube2h	UTR3
19	45552731	45552878	7.51798	33.267	29.2756	ENSMUSG00000025218	Poll	UTR3
2	181581910	181582384	7.51688	157.806	152.53	ENSMUSG00000089917	Uckl1	Intergenic
2	181581910	181582384	7.51688	157.806	152.53	ENSMUSG00000000823	Zfp512b	UTR3
10	99108898	99109386	7.51638	51.7506	47.4307	ENSMUSG00000090035	Galnt4	LastExon
10	99108898	99109386	7.51638	51.7506	47.4307	ENSMUSG00000019952	Poc1b	Intron1
9	118061708	118062211	7.51611	61.2541	56.7977	ENSMUSG00000039285	Azi2	LastExon
1	8429641	8429729	7.51415	14.6614	10.6907	ENSMUSG00000025909	Sntg1	Intron19
2	121169844	121170056	7.50964	56.7144	52.3207	ENSMUSG00000050619	Zscan29	Exon1
15	59654909	59655229	7.50885	26.2746	22.446	ENSMUSG00000032501	Trib1	UTR3
1	59163026	59163378	7.50733	38.2173	34.1268	ENSMUSG00000026024	Als2	UTR3
13	55609649	55609860	7.50733	38.2173	34.1268	ENSMUSG00000021504	B4galt7	UTR3
12	59202485	59202654	7.49953	19.854	16.2039	ENSMUSG00000035329	Fbxo33	LastExon
4	133591437	133591560	7.49953	19.854	16.2039	ENSMUSG00000028848	Gpn2	UTR3
8	71492747	71492885	7.49953	19.854	16.2039	ENSMUSG00000007610	Gtpbp3	LastExon
2	55595019	55595117	7.49953	19.854	16.2039	ENSMUSG00000026824	Kcnj3	LastExon
13	14197685	14197807	7.49944	43.175	38.9955	ENSMUSG00000039219	Arid4b	LastExon
4	40853874	40854235	7.49944	43.175	38.9955	ENSMUSG00000028413	B4galt1	Intergenic
3	104014978	104015990	7.49229	29.6998	25.7872	ENSMUSG00000052539	Magi3	UTR3
3	104014978	104015990	7.49229	29.6998	25.7872	ENSMUSG00000058388	Phtf1	LastIntron
15	80212040	80212566	7.49075	31.6822	27.7257	ENSMUSG00000042428	Mgat3	LastExon
6	134710875	134711033	7.48906	81.5442	76.8484	ENSMUSG00000042992	Borcs5	UTR3
5	136982206	136982347	7.48851	53.1009	48.7606	ENSMUSG00000059518	Znhit1	UTR3
16	14473575	14474267	7.48645	24.731	20.9414	ENSMUSG00000023088	Abcc1	UTR3
16	18284460	18284580	7.48645	24.731	20.9414	ENSMUSG00000022718	Dgcr8	UTR5
8	57651850	57651987	7.48645	24.731	20.9414	ENSMUSG00000031608	Galnt7	Intron1
7	67759222	67759448	7.48645	24.731	20.9414	ENSMUSG00000030554	Synm	Exon1
6	90689659	90690228	7.48607	78.5268	73.8622	ENSMUSG00000034312	Iqsec1	Exon3
9	111272634	111273976	7.48403	68.0374	63.4926	ENSMUSG00000046785	Epm2aip1	LastExon
10	81609196	81609738	7.47852	29.6573	25.7461	ENSMUSG00000074862	BC025920	LastExon
2	179895775	179896271	7.47852	29.6573	25.7461	ENSMUSG00000000305	Cdh4	LastExon
18	36791236	36791644	7.47852	29.6573	25.7461	ENSMUSG00000019143	Hars2	UTR3
8	106200805	106200963	7.47852	29.6573	25.7461	ENSMUSG00000033106	Slc7a6os	LastExon
18	31888261	31888467	7.47852	29.6573	25.7461	ENSMUSG00000024400	Wdr33	Exon16
14	52311632	52312397	7.46964	28.6394	24.7529	ENSMUSG00000049532	Sall2	UTR3
7	34639625	34640406	7.46939	39.5605	35.4446	ENSMUSG00000030499	Kctd15	UTR3
5	33864647	33864776	7.46939	39.5605	35.4446	ENSMUSG00000057406	Nsd2	Exon6
3	107331159	107331453	7.46935	24.6866	20.8981	ENSMUSG00000048109	Rbm15	LastExon
17	25730629	25730830	7.46917	22.7191	18.9846	ENSMUSG00000041199	Rpusd1	LastExon
14	48256286	48256679	7.46893	20.7616	17.0835	ENSMUSG00000021846	Peli2	LastExon
9	62796978	62797587	7.46652	44.5221	40.3203	ENSMUSG00000032244	Fem1b	LastExon
11	102306155	102306394	7.46101	59.4197	54.9881	ENSMUSG00000020923	Ubtf	UTR3
9	20873658	20874129	7.4548	99.1604	94.2914	ENSMUSG00000038884	A230050P20Rik	LastExon
9	20873658	20874129	7.4548	99.1604	94.2914	ENSMUSG00000038742	Angptl6	UTR3
3	126922984	126923957	7.45437	104.127	99.2147	ENSMUSG00000032826	Ank2	UTR3
2	145641289	145641776	7.45353	54.9	50.5325	ENSMUSG00000063873	Slc24a3	UTR3
15	6796283	6797134	7.44521	27.579	23.7175	ENSMUSG00000050310	Rictor	UTR3
6	115618792	115619223	7.44036	75.6796	71.0453	ENSMUSG00000000439	Mkrn2	UTR3
6	115618792	115619223	7.44036	75.6796	71.0453	ENSMUSG00000000441	Raf1	LastExon
17	34037503	34037655	7.43883	60.7742	56.3246	ENSMUSG00000039656	Rxrb	LastExon
8	107412681	107412818	7.43638	21.6628	17.9583	ENSMUSG00000003848	Nob1	LastExon
11	44454863	44455018	7.4362	45.8715	41.6467	ENSMUSG00000041231	Ublcp1	UTR3
5	149214792	149215292	7.4362	45.8715	41.6467	ENSMUSG00000041264	Uspl1	LastExon
19	6531991	6532154	7.43463	146.579	141.364	ENSMUSG00000033768	Nrxn2	LastExon
9	58877150	58877388	7.43308	35.9453	31.8992	ENSMUSG00000032340	Neo1	UTR3
14	56793928	56794477	7.43308	35.9453	31.8992	ENSMUSG00000040123	Zmym5	LastExon
11	20725721	20726110	7.43244	34.458	30.4421	ENSMUSG00000049659	Aftph	Exon1
13	119487389	119487641	7.43177	18.2638	14.6612	ENSMUSG00000074635	3110070M22Rik	UTR3
1	193174476	193174687	7.43177	18.2638	14.6612	ENSMUSG00000079144	A130010J15Rik	LastExon
12	110976467	110976579	7.43177	18.2638	14.6612	ENSMUSG00000037904	Ankrd9	UTR3
5	66302191	66302634	7.43177	18.2638	14.6612	ENSMUSG00000029207	Apbb2	UTR3
11	85190786	85191105	7.43177	18.2638	14.6612	ENSMUSG00000018481	Appbp2	UTR3
5	131439293	131439523	7.43177	18.2638	14.6612	ENSMUSG00000029673	Auts2	LastExon
1	176735636	176735732	7.43177	18.2638	14.6612	ENSMUSG00000057335	Cep170	UTR3
15	79423696	79423809	7.43177	18.2638	14.6612	ENSMUSG00000022433	Csnk1e	UTR3
10	25398601	25398693	7.43177	18.2638	14.6612	ENSMUSG00000019978	Epb41l2	Intron1
9	15914728	15915538	7.43177	18.2638	14.6612	ENSMUSG00000074505	Fat3	UTR3
5	128602491	128602691	7.43177	18.2638	14.6612	ENSMUSG00000081683	Fzd10	LastExon
9	21748515	21748770	7.43177	18.2638	14.6612	ENSMUSG00000032193	Ldlr	UTR3
9	75461012	75461104	7.43177	18.2638	14.6612	ENSMUSG00000042487	Leo1	Exon9
13	102735125	102735284	7.43177	18.2638	14.6612	ENSMUSG00000034751	Mast4	LastExon
3	25433555	25433920	7.43177	18.2638	14.6612	ENSMUSG00000063887	Nlgn1	UTR3
15	66609755	66609862	7.43177	18.2638	14.6612	ENSMUSG00000072501	Phf20l1	Intron9
3	142793531	142794011	7.43177	18.2638	14.6612	ENSMUSG00000004591	Pkn2	UTR3
15	5179043	5179137	7.43177	18.2638	14.6612	ENSMUSG00000050697	Prkaa1	UTR3
1	119659506	119659895	7.43177	18.2638	14.6612	ENSMUSG00000026384	Ptpn4	UTR3
5	14252320	14252529	7.43177	18.2638	14.6612	ENSMUSG00000063531	Sema3e	LastExon
5	92904479	92904637	7.43177	18.2638	14.6612	ENSMUSG00000029381	Shroom3	Intron2
15	100394111	100394219	7.43177	18.2638	14.6612	ENSMUSG00000023030	Slc11a2	UTR3
10	5081747	5081991	7.43177	18.2638	14.6612	ENSMUSG00000096054	Syne1	Intron127
7	130764549	130764655	7.43177	18.2638	14.6612	ENSMUSG00000030852	Tacc2	UTR3
10	115240886	115240980	7.43177	18.2638	14.6612	ENSMUSG00000020130	Tbc1d15	Exon2
17	68842116	68842264	7.43177	18.2638	14.6612	ENSMUSG00000095407	Tmem200c	LastExon
18	46167373	46167602	7.43177	18.2638	14.6612	ENSMUSG00000033949	Trim36	UTR3
8	36512136	36512275	7.43177	18.2638	14.6612	ENSMUSG00000039620	Trmt9b	LastExon
7	36771475	36771780	7.43177	18.2638	14.6612	ENSMUSG00000021217	Tshz3	LastExon
11	75445533	75445775	7.43177	18.2638	14.6612	ENSMUSG00000045374	Wdr81	Exon7
5	139473145	139473428	7.43177	18.2638	14.6612	ENSMUSG00000053581	Zfand2a	UTR3
7	66171131	66171799	7.43066	30.9908	27.0499	ENSMUSG00000032640	Chsy1	LastExon
8	48228150	48228959	7.43066	30.9908	27.0499	ENSMUSG00000031561	Tenm3	UTR3
1	171217930	171218230	7.42859	25.0712	21.273	ENSMUSG00000005677	Nr1i3	LastIntron
1	171217930	171218230	7.42859	25.0712	21.273	ENSMUSG00000005674	Tomm40l	UTR3
2	120317632	120317985	7.42859	25.0712	21.273	ENSMUSG00000027291	Vps39	UTR3
5	130206991	130207090	7.42747	91.9428	87.1421	ENSMUSG00000025340	Rabgef1	Exon4
13	55245765	55245905	7.42714	26.0501	22.227	ENSMUSG00000021488	Nsd1	Exon5
18	47248462	47249195	7.42714	26.0501	22.227	ENSMUSG00000019647	Sema6a	LastExon
16	31989170	31989333	7.42714	26.0501	22.227	ENSMUSG00000022772	Senp5	Exon2
4	53567518	53567630	7.42714	26.0501	22.227	ENSMUSG00000028412	Slc44a1	UTR3
3	108203483	108203621	7.42156	21.1416	17.4538	ENSMUSG00000048997	Atxn7l2	Exon7
8	102679674	102679804	7.42156	21.1416	17.4538	ENSMUSG00000031673	Cdh11	Exon3
7	25268455	25268547	7.42156	21.1416	17.4538	ENSMUSG00000005442	Cic	Intron1
11	70986694	70987135	7.42156	21.1416	17.4538	ENSMUSG00000040620	Dhx33	UTR3
4	129143507	129143930	7.42156	21.1416	17.4538	ENSMUSG00000001334	Fndc5	UTR3
7	5032474	5032576	7.42156	21.1416	17.4538	ENSMUSG00000109129	Gm44973	LastIntron
7	118845081	118845303	7.42156	21.1416	17.4538	ENSMUSG00000030980	Knop1	UTR3
5	144176079	144176246	7.42156	21.1416	17.4538	ENSMUSG00000038970	Lmtk2	Exon11
11	65690247	65690774	7.42156	21.1416	17.4538	ENSMUSG00000033352	Map2k4	UTR3
17	6955997	6956099	7.42156	21.1416	17.4538	ENSMUSG00000052031	Tagap1	LastExon
7	5032474	5032576	7.42156	21.1416	17.4538	ENSMUSG00000074405	Zfp865	LastIntron
15	81650820	81651146	7.41893	37.3759	33.3008	ENSMUSG00000055024	Ep300	LastExon
2	32762053	32762169	7.41866	21.1349	17.4477	ENSMUSG00000009563	Tor2a	LastExon
7	110055161	110055380	7.41527	57.1605	52.7602	ENSMUSG00000066232	Ipo7	UTR3
X	42094757	42095012	7.40922	114.534	109.538	ENSMUSG00000025860	Xiap	Exon1
9	121712584	121712765	7.4082	47.2227	42.9757	ENSMUSG00000032526	Ss18l2	LastExon
15	66919369	66919898	7.39996	20.6073	16.9339	ENSMUSG00000005124	Wisp1	LastExon
3	108187948	108188219	7.39693	37.2902	33.217	ENSMUSG00000050947	Amigo1	LastExon
1	158688640	158688799	7.39693	37.2902	33.217	ENSMUSG00000026587	Astn1	LastExon
12	76110119	76110376	7.39693	37.2902	33.217	ENSMUSG00000063450	Syne2	UTR3
3	96221335	96221529	7.39025	18.6583	15.0468	ENSMUSG00000068854	Hist2h2be	LastExon
8	121604518	121605003	7.39013	25.4581	21.6508	ENSMUSG00000092329	Gm20388	Intron1
8	121604518	121605003	7.39013	25.4581	21.6508	ENSMUSG00000061410	Zcchc14	Exon12
18	5772823	5773029	7.39007	32.3354	28.3655	ENSMUSG00000024238	Zeb1	LastExon
17	24185838	24186249	7.3844	69.8144	65.2476	ENSMUSG00000107169	Gm43796	Exon1
17	24185838	24186249	7.3844	69.8144	65.2476	ENSMUSG00000036473	Tbc1d24	Exon3
17	25782079	25782456	7.38225	48.5758	44.3064	ENSMUSG00000002280	Narfl	LastExon
11	49216612	49216871	7.37987	35.2535	31.2203	ENSMUSG00000046311	Zfp62	LastExon
8	107096288	107096409	7.37617	27.3783	23.5218	ENSMUSG00000031921	Terf2	Exon1
2	160684401	160684493	7.37617	27.3783	23.5218	ENSMUSG00000070544	Top1	Intron4
9	56937915	56938258	7.37434	43.6063	39.4191	ENSMUSG00000032288	Imp3	LastExon
2	120041694	120041939	7.37187	21.5122	17.8104	ENSMUSG00000033852	Gm28042	UTR3
2	120041694	120041939	7.37187	21.5122	17.8104	ENSMUSG00000098488	Pla2g4b	LastExon
19	10545667	10546006	7.37138	46.5493	42.3129	ENSMUSG00000034820	Cpsf7	UTR3
1	46835758	46835885	7.36738	18.1337	14.5378	ENSMUSG00000025986	Slc39a10	Exon2
9	22113397	22113584	7.3666	54.9017	50.534	ENSMUSG00000013822	Elof1	UTR3
13	93441085	93441335	7.36488	22.9521	19.2112	ENSMUSG00000021690	Jmy	Exon9
7	126562610	126562731	7.36418	38.6381	34.5387	ENSMUSG00000030738	Eif3c	Exon8
5	137031441	137031574	7.36304	50.9409	46.6339	ENSMUSG00000037428	Vgf	LastExon
5	114808930	114809249	7.36214	60.7868	56.3368	ENSMUSG00000072694	1500011B03Rik	UTR3
5	114808930	114809249	7.36214	60.7868	56.3368	ENSMUSG00000092252	Gm20499	UTR3
5	116442652	116442909	7.35926	19.5527	15.911	ENSMUSG00000063919	Srrm4	UTR3
5	149759498	149759619	7.35747	22.448	18.7209	ENSMUSG00000051950	B3glct	LastExon
11	63964048	63964164	7.35747	22.448	18.7209	ENSMUSG00000042148	Cox10	UTR3
2	144406937	144407258	7.35747	22.448	18.7209	ENSMUSG00000027425	Kat14	UTR3
2	144393950	144394304	7.35747	22.448	18.7209	ENSMUSG00000027425	Kat14	Exon7
1	165593449	165593624	7.35747	22.448	18.7209	ENSMUSG00000026566	Mpzl1	UTR3
17	81649366	81649536	7.35747	22.448	18.7209	ENSMUSG00000054640	Slc8a1	Exon1
7	140153269	140153423	7.35747	22.448	18.7209	ENSMUSG00000045733	Sprn	LastExon
19	11819265	11819368	7.35747	22.448	18.7209	ENSMUSG00000041488	Stx3	UTR5
10	62429425	62429696	7.35747	22.448	18.7209	ENSMUSG00000020079	Supv3l1	LastExon
1	4348001	4348938	7.35708	248.717	243.001	ENSMUSG00000025900	Rp1	LastExon
11	69758519	69758618	7.35069	33.6728	29.6737	ENSMUSG00000005198	Polr2a	UTR5
1	161818287	161818793	7.35069	33.6728	29.6737	ENSMUSG00000040297	Suco	UTR3
1	156007556	156007699	7.34932	27.2999	23.4456	ENSMUSG00000026466	Tor1aip1	LastExon
5	108269489	108269754	7.347	22.4225	18.6979	ENSMUSG00000029265	Dr1	UTR5
7	45824630	45824756	7.33771	96.497	91.6528	ENSMUSG00000058743	Kcnj14	UTR5
16	55990449	55990614	7.33707	19.0259	15.4019	ENSMUSG00000022601	Zbtb11	Exon4
3	94958781	94959148	7.33568	51.2863	46.9743	ENSMUSG00000005774	Rfx5	UTR3
9	59314949	59315399	7.33188	28.7136	24.825	ENSMUSG00000025236	Adpgk	LastExon
8	46181715	46181915	7.33188	28.7136	24.825	ENSMUSG00000031631	Cfap97	Exon3
7	5031192	5031470	7.33188	28.7136	24.825	ENSMUSG00000109129	Gm44973	LastIntron
16	75757728	75758292	7.33188	28.7136	24.825	ENSMUSG00000032932	Hspa13	UTR3
5	146958879	146959134	7.33188	28.7136	24.825	ENSMUSG00000016510	Mtif3	Exon2
7	5031192	5031470	7.33188	28.7136	24.825	ENSMUSG00000074405	Zfp865	Exon2
2	34775616	34776289	7.32869	252.396	246.662	ENSMUSG00000026864	Hspa5	LastExon
16	33766675	33767092	7.32822	21.8929	18.1814	ENSMUSG00000075254	Heg1	LastExon
2	180661128	180661559	7.32305	46.3137	42.0813	ENSMUSG00000038914	Dido1	LastExon
1	171340850	171341198	7.32305	46.3137	42.0813	ENSMUSG00000013997	Nit1	UTR3
8	124370111	124370602	7.32305	46.3137	42.0813	ENSMUSG00000050751	Pgbd5	UTR3
8	91051223	91051578	7.31943	63.9484	59.4573	ENSMUSG00000056608	Chd9	LastExon
11	103116221	103116471	7.31694	35.0196	30.9916	ENSMUSG00000048878	Hexim1	UTR5
7	46397937	46398179	7.31694	35.0196	30.9916	ENSMUSG00000058975	Kcnc1	Exon1
1	168431313	168431563	7.31471	52.6434	48.3097	ENSMUSG00000052534	Pbx1	Exon1
16	76294132	76294720	7.31075	19.9266	16.2752	ENSMUSG00000048490	Nrip1	LastExon
6	87792564	87792735	7.30847	21.3634	17.669	ENSMUSG00000107928	Gm45140	UTR3
6	87792564	87792735	7.30847	21.3634	17.669	ENSMUSG00000030055	Rab43	UTR3
12	81199108	81199515	7.30832	58.9753	54.5494	ENSMUSG00000079055	Slc8a3	UTR3
4	118627643	118627739	7.30763	18.9635	15.3408	ENSMUSG00000028729	Ebna1bp2	UTR3
8	120570734	120571201	7.30715	41.3412	37.1928	ENSMUSG00000092329	Gm20388	Intron1
8	120570734	120571201	7.30715	41.3412	37.1928	ENSMUSG00000031822	Gse1	Exon9
12	112908822	112909266	7.30715	41.3412	37.1928	ENSMUSG00000002799	Jag2	UTR3
15	99779319	99779544	7.30715	41.3412	37.1928	ENSMUSG00000023022	Lima1	UTR3
5	20896096	20896691	7.30715	41.3412	37.1928	ENSMUSG00000039968	Rsbn1l	UTR3
2	168182044	168183026	7.30602	100.584	95.7022	ENSMUSG00000051149	Adnp	UTR3
2	168182044	168183026	7.30602	100.584	95.7022	ENSMUSG00000093752	Gm20716	UTR3
1	158246570	158246745	7.30385	23.7679	20.0036	ENSMUSG00000004031	Brinp2	UTR3
14	36879020	36879547	7.30385	23.7679	20.0036	ENSMUSG00000058690	Ccser2	UTR3
1	156705727	156705986	7.30385	23.7679	20.0036	ENSMUSG00000033557	Fam20b	LastExon
1	119659506	119659895	7.30385	23.7679	20.0036	ENSMUSG00000026384	Ptpn4	UTR3
13	112738067	112738213	7.30385	23.7679	20.0036	ENSMUSG00000047789	Slc38a9	UTR3
18	61197748	61197950	7.30229	27.1622	23.3112	ENSMUSG00000034320	Slc26a2	UTR3
7	37567968	37568299	7.30229	27.1622	23.3112	ENSMUSG00000043456	Zfp536	Exon4
18	76970677	76971229	7.30023	47.6698	43.4154	ENSMUSG00000025421	Hdhd2	LastExon
6	124861379	124862108	7.29704	92.6624	87.854	ENSMUSG00000038390	Gpr162	Exon3
4	33245937	33246503	7.29681	65.7532	61.238	ENSMUSG00000040128	Pnrc1	UTR3
2	165812348	165812828	7.29579	77.9758	73.3167	ENSMUSG00000039671	Zmynd8	Exon15
3	108187341	108187790	7.29306	30.0544	26.1346	ENSMUSG00000050947	Amigo1	LastExon
9	109065272	109065571	7.29306	30.0544	26.1346	ENSMUSG00000025646	Atrip	Exon8
5	123371070	123371366	7.29306	30.0544	26.1346	ENSMUSG00000029438	Bcl7a	LastExon
7	144514439	144514531	7.29306	30.0544	26.1346	ENSMUSG00000037519	Ppfia1	Exon10
18	61198114	61198513	7.29306	30.0544	26.1346	ENSMUSG00000034320	Slc26a2	UTR3
1	43075294	43075565	7.28768	20.834	17.1545	ENSMUSG00000070939	Tgfbrap1	Exon3
16	11072834	11073111	7.28653	36.3695	32.3145	ENSMUSG00000037972	Snn	UTR3
3	129787886	129788465	7.28602	36.8554	32.7916	ENSMUSG00000093865	Lrit3	UTR3
13	54052995	54053215	7.28216	42.6958	38.5237	ENSMUSG00000021478	Drd1	LastExon
6	86368787	86369024	7.27902	49.0271	44.7511	ENSMUSG00000057497	Fam136a	LastExon
2	30957145	30957262	7.2673	21.7466	18.0401	ENSMUSG00000026848	Tor1b	LastExon
11	36007397	36007856	7.26575	20.3047	16.6415	ENSMUSG00000049336	Tenm2	UTR3
15	72806621	72808241	7.25971	113.735	108.744	ENSMUSG00000047921	Trappc9	LastIntron
2	91917736	91917976	7.25915	44.052	39.8576	ENSMUSG00000040506	Ambra1	LastExon
17	12271701	12271861	7.25915	44.052	39.8576	ENSMUSG00000014426	Map3k4	Exon3
19	7039874	7039968	7.25898	37.7219	33.6402	ENSMUSG00000024966	Stip1	Exon1
11	67789794	67789957	7.25874	31.3998	27.4495	ENSMUSG00000097886	Gsg1l2	UTR3
3	63963942	63964308	7.25874	31.3998	27.4495	ENSMUSG00000027822	Slc33a1	Exon1
12	53140592	53140715	7.25834	25.0978	21.2988	ENSMUSG00000061603	Akap6	Exon13
9	106373768	106373893	7.25834	25.0978	21.2988	ENSMUSG00000053716	Dusp7	LastExon
11	42135453	42135613	7.25834	25.0978	21.2988	ENSMUSG00000010803	Gabra1	Exon9
4	119226206	119226458	7.25761	18.8572	15.2375	ENSMUSG00000078584	AU022252	UTR3
4	118161725	118161874	7.25761	18.8572	15.2375	ENSMUSG00000033326	Kdm4a	Exon10
11	71025552	71025784	7.25761	18.8572	15.2375	ENSMUSG00000040599	Mis12	LastExon
5	128268721	128268825	7.25761	18.8572	15.2375	ENSMUSG00000034310	Tmem132d	Exon2
10	79960174	79960266	7.25761	18.8572	15.2375	ENSMUSG00000035754	Wdr18	Exon1
7	43297758	43298115	7.25761	18.8572	15.2375	ENSMUSG00000012640	Zfp715	UTR3
2	91933123	91933464	7.25606	39.6563	35.5388	ENSMUSG00000040479	Dgkz	UTR3
19	27322716	27323067	7.25288	255.742	249.993	ENSMUSG00000047298	Kcnv2	UTR5
14	37061599	37062244	7.25177	115.099	110.098	ENSMUSG00000041044	Lrit1	LastExon
2	119293271	119293877	7.24879	32.3366	28.3666	ENSMUSG00000034216	Vps18	Exon4
7	92657425	92657753	7.24616	21.2164	17.5259	ENSMUSG00000041328	Pcf11	Exon8
7	27748156	27748509	7.2426	19.7755	16.1283	ENSMUSG00000037640	Zfp60	LastExon
6	133105807	133106677	7.2378	84.7902	80.0618	ENSMUSG00000072704	Smim10l1	UTR3
X	7560297	7560628	7.23647	25.0376	21.2401	ENSMUSG00000039556	Ppp1r3f	LastExon
4	106438909	106439163	7.23391	39.0764	34.9693	ENSMUSG00000028514	Usp24	UTR3
17	85623990	85624461	7.23185	98.8252	93.9601	ENSMUSG00000038805	Six3	UTR3
18	61715816	61716074	7.22818	32.7488	28.7689	ENSMUSG00000024580	Grpel2	LastExon
17	46891302	46891721	7.22747	46.3297	42.0972	ENSMUSG00000036430	Tbcc	LastExon
18	46506017	46506397	7.22356	53.1057	48.7653	ENSMUSG00000033319	Fem1c	LastExon
19	56810240	56810342	7.21923	26.4352	22.6018	ENSMUSG00000035173	Ccdc186	Exon3
1	44167223	44167599	7.21923	26.4352	22.6018	ENSMUSG00000026048	Ercc5	Exon8
5	3641370	3641481	7.21923	26.4352	22.6018	ENSMUSG00000007415	Gatad1	UTR3
9	65555964	65556371	7.21923	26.4352	22.6018	ENSMUSG00000050721	Plekho2	LastExon
16	4001092	4001421	7.21923	26.4352	22.6018	ENSMUSG00000039738	Slx4	Intron1
12	108815454	108815553	7.21923	26.4352	22.6018	ENSMUSG00000021264	Yy1	LastExon
6	54888536	54888639	7.21923	26.4352	22.6018	ENSMUSG00000058446	Znrf2	UTR3
4	33095434	33095794	7.21841	35.1347	31.1042	ENSMUSG00000023267	Gabrr2	LastExon
13	14187032	14187229	7.2182	46.7685	42.5292	ENSMUSG00000039219	Arid4b	Exon20
8	110088455	110088588	7.2182	46.7685	42.5292	ENSMUSG00000091041	Gm17720	LastIntron
8	119941365	119941923	7.2182	46.7685	42.5292	ENSMUSG00000092329	Gm20388	Intron1
8	119941365	119941923	7.2182	46.7685	42.5292	ENSMUSG00000031826	Usp10	Intergenic
16	33496517	33497016	7.2182	46.7685	42.5292	ENSMUSG00000022811	Zfp148	LastExon
8	110088455	110088588	7.2182	46.7685	42.5292	ENSMUSG00000044676	Zfp612	LastExon
18	6111729	6111976	7.21812	19.2464	15.6162	ENSMUSG00000041225	Arhgap12	Exon1
7	64871980	64872451	7.2152	33.6703	29.6715	ENSMUSG00000030518	Fam189a1	Intron2
7	64871980	64872451	7.2152	33.6703	29.6715	ENSMUSG00000070520	Nsmce3	UTR3
11	78037185	78037327	7.2111	17.8156	14.2302	ENSMUSG00000020834	Dhrs13	LastExon
7	46997590	46997715	7.2111	17.8156	14.2302	ENSMUSG00000049516	Spty2d1	Exon3
9	20593193	20593536	7.2111	17.8156	14.2302	ENSMUSG00000058192	Zfp846	LastExon
8	84912222	84912684	7.21039	50.6067	46.3049	ENSMUSG00000003812	Dnase2a	Exon6
8	84912222	84912684	7.21039	50.6067	46.3049	ENSMUSG00000053693	Mast1	LastExon
5	114942204	114942299	7.20328	20.1627	16.5026	ENSMUSG00000029559	2210016L21Rik	UTR5
1	78665054	78665491	7.20328	20.1627	16.5026	ENSMUSG00000032883	Acsl3	Intron2
1	93768009	93768106	7.20328	20.1627	16.5026	ENSMUSG00000026280	Atg4b	Exon2
3	37320859	37321207	7.20328	20.1627	16.5026	ENSMUSG00000051444	Bbs12	LastExon
9	53617486	53618009	7.20328	20.1627	16.5026	ENSMUSG00000032030	Cul5	UTR3
1	77369207	77369327	7.20328	20.1627	16.5026	ENSMUSG00000026235	Epha4	UTR3
X	17557828	17558021	7.20328	20.1627	16.5026	ENSMUSG00000025040	Fundc1	UTR3
16	21930177	21930394	7.20328	20.1627	16.5026	ENSMUSG00000033618	Map3k13	UTR3
1	55238333	55239004	7.20328	20.1627	16.5026	ENSMUSG00000046994	Mars2	LastExon
3	79068952	79069224	7.20328	20.1627	16.5026	ENSMUSG00000062232	Rapgef2	Exon28
1	78665054	78665491	7.20328	20.1627	16.5026	ENSMUSG00000079470	Utp14b	LastExon
17	46413166	46413360	7.20328	20.1627	16.5026	ENSMUSG00000015597	Zfp318	LastExon
7	29874209	29874351	7.20328	20.1627	16.5026	ENSMUSG00000058402	Zfp420	LastIntron
3	108074852	108075054	7.20218	33.1393	29.1515	ENSMUSG00000027889	Ampd2	LastExon
2	129810583	129811193	7.20089	166.749	161.427	ENSMUSG00000037885	Stk35	LastIntron
7	19585088	19585248	7.19944	62.1682	57.6997	ENSMUSG00000061028	Clasrp	Exon13
10	128807341	128807552	7.19339	69.8705	65.3032	ENSMUSG00000025354	Dnajc14	Exon2
16	91615708	91616031	7.19295	26.3587	22.528	ENSMUSG00000039763	Dnajc28	UTR3
11	87611025	87611167	7.18998	41.7908	37.6349	ENSMUSG00000018401	Mtmr4	Exon16
7	44251422	44251697	7.18642	63.5316	59.0456	ENSMUSG00000045411	2410002F23Rik	LastExon
7	89141762	89141854	7.18525	27.7784	23.9122	ENSMUSG00000039428	Tmem135	UTR3
4	102943918	102944084	7.1849	21.0712	17.3847	ENSMUSG00000028524	Sgip1	Intron18
17	33691834	33692096	7.18286	49.4896	45.2058	ENSMUSG00000079557	2020-03-02	LastIntron
17	65967718	65968086	7.18286	49.4896	45.2058	ENSMUSG00000034647	Ankrd12	UTR3
5	107508719	107509047	7.18187	37.408	33.3323	ENSMUSG00000111375	Btbd8	Exon17
5	107508719	107509047	7.18187	37.408	33.3323	ENSMUSG00000106631	Gm42669	Exon1
10	89640686	89640927	7.17944	23.4436	19.6892	ENSMUSG00000069539	Scyl2	LastExon
10	112927378	112927757	7.17581	61.0436	56.5899	ENSMUSG00000074748	Atxn7l3b	UTR3
19	29809748	29810636	7.17406	64.8954	60.3913	ENSMUSG00000074909	Ranbp6	LastExon
5	98186474	98186946	7.17334	94.3437	89.5192	ENSMUSG00000035456	Prdm8	LastExon
2	174427695	174427892	7.17255	40.7465	36.609	ENSMUSG00000016256	Ctsz	UTR3
4	109454148	109454462	7.16884	80.303	75.6197	ENSMUSG00000028557	Rnf11	UTR3
15	101210938	101211360	7.16694	50.8514	46.5459	ENSMUSG00000000532	Acvr1b	UTR3
10	77294577	77294868	7.16694	50.8514	46.5459	ENSMUSG00000020262	Adarb1	UTR3
10	81123755	81123864	7.16694	50.8514	46.5459	ENSMUSG00000035027	Map2k2	UTR3
1	163953580	163953699	7.16635	17.2571	13.6888	ENSMUSG00000041406	BC055324	LastIntron
1	44142877	44143264	7.16635	17.2571	13.6888	ENSMUSG00000041684	Bivm	LastExon
8	94865026	94865179	7.16635	17.2571	13.6888	ENSMUSG00000040631	Dok4	UTR3
4	120166981	120167146	7.16635	17.2571	13.6888	ENSMUSG00000028635	Edn2	UTR3
12	98853639	98853731	7.16635	17.2571	13.6888	ENSMUSG00000051166	Eml5	Intron15
3	95217627	95217741	7.16635	17.2571	13.6888	ENSMUSG00000038766	Gabpb2	UTR5
3	85524834	85525004	7.16635	17.2571	13.6888	ENSMUSG00000102805	Gm37240	Intron3
7	30178119	30178391	7.16635	17.2571	13.6888	ENSMUSG00000066647	Gm5113	LastExon
3	96222919	96223179	7.16635	17.2571	13.6888	ENSMUSG00000068854	Hist2h2be	UTR3
10	14149336	14149729	7.16635	17.2571	13.6888	ENSMUSG00000015501	Hivep2	LastExon
10	62340081	62340283	7.16635	17.2571	13.6888	ENSMUSG00000037012	Hk1	UTR5
9	35566529	35566912	7.16635	17.2571	13.6888	ENSMUSG00000050555	Hyls1	LastExon
8	15026980	15027334	7.16635	17.2571	13.6888	ENSMUSG00000055675	Kbtbd11	UTR5
1	55238333	55239004	7.16635	17.2571	13.6888	ENSMUSG00000046994	Mars2	LastExon
5	140328253	140328456	7.16635	17.2571	13.6888	ENSMUSG00000029557	Mrm2	UTR3
5	3605713	3605843	7.16635	17.2571	13.6888	ENSMUSG00000005907	Pex1	Exon5
2	16751374	16751652	7.16635	17.2571	13.6888	ENSMUSG00000026748	Plxdc2	UTR3
8	94865026	94865179	7.16635	17.2571	13.6888	ENSMUSG00000031783	Polr2c	Intron8
3	69468444	69468536	7.16635	17.2571	13.6888	ENSMUSG00000027784	Ppm1l	Intron1
4	143418895	143419159	7.16635	17.2571	13.6888	ENSMUSG00000046862	Pramef8	LastExon
9	35566529	35566912	7.16635	17.2571	13.6888	ENSMUSG00000032103	Pus3	LastExon
9	72619505	72619880	7.16635	17.2571	13.6888	ENSMUSG00000037674	Rfx7	LastExon
2	167493221	167493344	7.16635	17.2571	13.6888	ENSMUSG00000006418	Rnf114	UTR5
2	119764102	119764215	7.16635	17.2571	13.6888	ENSMUSG00000034032	Rpap1	UTR3
14	65920885	65921198	7.16635	17.2571	13.6888	ENSMUSG00000034463	Scara3	LastExon
2	65764980	65765123	7.16635	17.2571	13.6888	ENSMUSG00000075318	Scn2a	UTR3
1	163953580	163953699	7.16635	17.2571	13.6888	ENSMUSG00000026584	Scyl3	UTR3
9	63649185	63649280	7.16635	17.2571	13.6888	ENSMUSG00000032402	Smad3	UTR3
7	73943104	73943266	7.16635	17.2571	13.6888	ENSMUSG00000025789	St8sia2	UTR3
1	119527479	119527812	7.16635	17.2571	13.6888	ENSMUSG00000098923	Tmem185b	LastExon
3	54317991	54318146	7.16635	17.2571	13.6888	ENSMUSG00000027748	Trpc4	LastExon
17	27895916	27896102	7.16635	17.2571	13.6888	ENSMUSG00000039512	Uhrf1bp1	LastExon
5	114123042	114123174	7.16635	17.2571	13.6888	ENSMUSG00000029592	Usp30	UTR3
3	9280797	9280974	7.16635	17.2571	13.6888	ENSMUSG00000069114	Zbtb10	LastExon
5	38200592	38200980	7.16635	17.2571	13.6888	ENSMUSG00000029127	Zbtb49	UTR3
5	143246371	143246590	7.16635	17.2571	13.6888	ENSMUSG00000029587	Zfp12	UTR3
7	43589346	43589555	7.16635	17.2571	13.6888	ENSMUSG00000030469	Zfp719	LastExon
5	6770610	6770766	7.16635	17.2571	13.6888	ENSMUSG00000092094	Zfp804b	LastExon
17	33002807	33003675	7.16635	17.2571	13.6888	ENSMUSG00000053390	Zfp952	LastExon
7	81041597	81041836	7.16466	18.1888	14.5914	ENSMUSG00000005621	Zfp592	LastExon
11	97333839	97334522	7.1645	40.2286	36.1006	ENSMUSG00000070337	Gpr179	UTR3
19	3383758	3384268	7.16405	103.412	98.505	ENSMUSG00000024900	Cpt1a	LastExon
X	53642699	53642998	7.15862	21.4836	17.783	ENSMUSG00000067925	Rtl8a	UTR3
5	110755443	110756055	7.15545	29.1262	25.2273	ENSMUSG00000029505	Ep400	Exon2
6	119480438	119481105	7.15545	29.1262	25.2273	ENSMUSG00000030019	Fbxl14	LastExon
3	79480703	79481148	7.15545	29.1262	25.2273	ENSMUSG00000061175	Fnip2	Exon14
16	36932535	36933036	7.15545	29.1262	25.2273	ENSMUSG00000034243	Golgb1	UTR3
3	41614173	41614293	7.15545	29.1262	25.2273	ENSMUSG00000025764	Jade1	UTR3
3	152276453	152276719	7.15545	29.1262	25.2273	ENSMUSG00000054942	Miga1	UTR3
19	36733504	36734183	7.15545	29.1262	25.2273	ENSMUSG00000067279	Ppp1r3c	LastExon
5	122320787	122321242	7.15545	29.1262	25.2273	ENSMUSG00000038582	Pptc7	LastExon
11	98973433	98973561	7.15545	29.1262	25.2273	ENSMUSG00000037992	Rara	LastExon
6	119480438	119481105	7.15545	29.1262	25.2273	ENSMUSG00000030170	Wnt5b	Intron1
8	94394807	94394995	7.15378	36.8118	32.7485	ENSMUSG00000031770	Herpud1	UTR3
9	94693972	94694258	7.15378	36.8118	32.7485	ENSMUSG00000031129	Slc9a9	Intron2
X	103460452	103460692	7.15344	174.083	168.722	ENSMUSG00000098078	Gm26992	LastIntron
12	84919371	84919655	7.15204	52.2141	47.8876	ENSMUSG00000042350	Arel1	UTR3
7	96906057	96906660	7.15153	59.9191	55.4808	ENSMUSG00000048078	Tenm4	LastExon
12	70054829	70054921	7.14956	19.0964	15.4705	ENSMUSG00000021068	Nin	Exon10
5	142457833	142458379	7.14639	28.6174	24.7317	ENSMUSG00000056493	Foxk1	UTR3
17	33917136	33917355	7.14559	33.4143	29.4203	ENSMUSG00000051390	Zbtb22	LastExon
7	16435746	16435995	7.14501	38.2189	34.1283	ENSMUSG00000059273	Zc3h4	UTR3
5	124835444	124835628	7.14133	76.695	72.049	ENSMUSG00000037979	Ccdc92	UTR3
15	97245064	97246347	7.13998	58.4002	53.9817	ENSMUSG00000048218	Amigo2	LastExon
5	73021009	73021148	7.13944	43.9649	39.772	ENSMUSG00000070733	Fryl	UTR3
5	145135107	145135216	7.13944	61.2835	56.8267	ENSMUSG00000029623	Pdap1	LastExon
7	130774803	130774899	7.13845	13.579	9.66099	ENSMUSG00000040298	Btbd16	Intron1
10	123710650	123710738	7.13845	13.579	9.66099	ENSMUSG00000044071	Fam19a2	LastIntron
2	30472672	30472760	7.13845	13.579	9.66099	ENSMUSG00000089762	Ier5l	UTR3
17	86921921	86922009	7.13845	13.579	9.66099	ENSMUSG00000037689	Tmem247	LastIntron
4	40260232	40260459	7.13828	29.5499	25.641	ENSMUSG00000036822	Topors	LastExon
2	85062890	85063746	7.13806	53.5775	49.2295	ENSMUSG00000033955	Tnks1bp1	Exon4
9	107538165	107538486	7.13701	22.3807	18.6571	ENSMUSG00000010045	Tmem115	UTR3
9	100495404	100495650	7.13344	38.1702	34.0808	ENSMUSG00000032475	Nck1	UTR3
3	40789151	40789394	7.13184	117.947	112.926	ENSMUSG00000025757	Hspa4l	LastExon
11	69990144	69990343	7.13035	70.355	65.7816	ENSMUSG00000018559	Ctdnep1	UTR3
9	21230235	21230831	7.13035	70.355	65.7816	ENSMUSG00000003308	Keap1	UTR3
4	53761190	53761519	7.12912	30.4776	26.5484	ENSMUSG00000028414	Fktn	LastExon
13	24993023	24993156	7.12912	30.4776	26.5484	ENSMUSG00000021339	Mrs2	UTR3
11	101666842	101667468	7.12849	271.061	265.243	ENSMUSG00000034936	Arl4d	LastExon
15	76646070	76646505	7.12523	33.8185	29.8154	ENSMUSG00000053929	Cyhr1	UTR3
18	34317809	34318588	7.12346	79.427	74.7526	ENSMUSG00000005871	Apc	LastExon
X	13487289	13487469	7.12186	18.5666	14.9568	ENSMUSG00000051228	Nyx	LastExon
12	21324291	21324387	7.12126	22.8155	19.0779	ENSMUSG00000052593	Adam17	UTR3
4	94501147	94501246	7.12126	22.8155	19.0779	ENSMUSG00000028578	Caap1	LastExon
4	129647689	129648000	7.12126	22.8155	19.0779	ENSMUSG00000003731	Kpna6	UTR3
13	94195030	94195174	7.12126	22.8155	19.0779	ENSMUSG00000045312	Lhfpl2	UTR3
7	44877259	44877569	7.12126	22.8155	19.0779	ENSMUSG00000002968	Med25	UTR3
11	76250045	76250471	7.12126	22.8155	19.0779	ENSMUSG00000038046	Mrm3	LastExon
1	64937987	64938261	7.12126	22.8155	19.0779	ENSMUSG00000051344	Plekhm3	Exon2
7	97653115	97653207	7.12126	22.8155	19.0779	ENSMUSG00000035623	Rsf1	Exon5
12	64967631	64968026	7.12126	22.8155	19.0779	ENSMUSG00000035614	Togaram1	Exon1
12	4295407	4295615	7.12082	37.1578	33.0875	ENSMUSG00000020647	Ncoa1	Exon12
9	106891825	106891927	7.12078	47.2348	42.9873	ENSMUSG00000032575	Manf	Exon1
8	119508231	119508581	7.12003	45.3109	41.0953	ENSMUSG00000031835	Mbtps1	LastExon
1	87803863	87803973	7.11782	490.28	483.759	ENSMUSG00000056055	Sag	Exon1
11	113728216	113728983	7.11712	64.0137	59.5215	ENSMUSG00000041598	Cdc42ep4	UTR3
9	13252077	13252799	7.1151	29.9518	26.035	ENSMUSG00000079084	Ccdc82	UTR5
19	42033597	42034085	7.11445	180.056	174.666	ENSMUSG00000025171	Ubtd1	LastExon
17	46801006	46801757	7.10912	25.1607	21.36	ENSMUSG00000036568	Bicral	UTR3
7	29161147	29161530	7.10567	31.832	27.8727	ENSMUSG00000037239	Spred3	UTR3
11	116086891	116086987	7.10567	31.832	27.8727	ENSMUSG00000034341	Wbp2	Exon1
14	37061599	37062244	7.1033	137.217	132.06	ENSMUSG00000041044	Lrit1	LastExon
3	88761995	88762464	7.10071	100.305	95.4257	ENSMUSG00000068923	Syt11	Exon3
9	106374137	106374294	7.09966	20.3964	16.729	ENSMUSG00000053716	Dusp7	UTR3
5	112421836	112422041	7.09966	20.3964	16.729	ENSMUSG00000058153	Sez6l	UTR3
11	120957966	120958447	7.09839	109.377	104.42	ENSMUSG00000025161	Slc16a3	LastExon
2	91512147	91512314	7.0925	18.037	14.4449	ENSMUSG00000027253	Lrp4	UTR3
11	49260693	49262070	7.09182	61.9211	57.4563	ENSMUSG00000020346	Mgat1	LastExon
17	79335393	79335624	7.08954	24.1554	20.3815	ENSMUSG00000036533	Cdc42ep3	LastExon
14	70584564	70584830	7.08954	24.1554	20.3815	ENSMUSG00000022095	Fam160b2	UTR3
16	11220769	11220861	7.08954	24.1554	20.3815	ENSMUSG00000062203	Gspt1	UTR3
18	60689074	60689234	7.08954	24.1554	20.3815	ENSMUSG00000054008	Ndst1	UTR3
3	102010757	102010923	7.08954	24.1554	20.3815	ENSMUSG00000048540	Nhlh2	UTR5
7	96906057	96906660	7.08954	24.1554	20.3815	ENSMUSG00000048078	Tenm4	LastExon
11	75266229	75266722	7.08733	31.2897	27.3431	ENSMUSG00000045287	Rtn4rl1	UTR3
1	134078979	134079121	7.08229	18.9485	15.3261	ENSMUSG00000020423	Btg2	Exon1
17	33334199	33335164	7.08229	18.9485	15.3261	ENSMUSG00000003929	Zfp81	UTR3
9	60587453	60587837	7.08219	25.559	21.7492	ENSMUSG00000047766	Lrrc49	UTR3
13	74031997	74032147	7.08214	32.2253	28.2577	ENSMUSG00000021573	Tppp	UTR3
10	94298519	94298629	7.0821	42.2535	38.09	ENSMUSG00000053420	Gm4792	UTR5
2	85061979	85062214	7.0821	42.2535	38.09	ENSMUSG00000033955	Tnks1bp1	Exon4
1	136626174	136626725	7.07945	60.4025	55.9573	ENSMUSG00000041483	Zfp281	LastExon
7	16810187	16810932	7.07868	69.4784	64.9153	ENSMUSG00000048920	Fkrp	UTR3
1	150328264	150328401	7.07659	1159.25	1151.61	ENSMUSG00000006007	Pdc	UTR5
8	83609974	83610330	7.07485	23.1682	19.4214	ENSMUSG00000005483	Dnajb1	Exon2
11	106154117	106154544	7.07334	19.8651	16.2149	ENSMUSG00000020700	Map3k3	LastExon
2	118792911	118793200	7.07181	45.0696	40.8578	ENSMUSG00000040035	Disp2	UTR3
7	141292018	141292135	7.07015	70.8452	66.2665	ENSMUSG00000025496	Drd4	UTR5
8	105636599	105636720	7.06759	43.6168	39.4294	ENSMUSG00000005705	Agrp	Intron1
8	105636599	105636720	7.06759	43.6168	39.4294	ENSMUSG00000005698	Ctcf	UTR5
5	30877111	30877444	7.06759	43.6168	39.4294	ENSMUSG00000038828	Tmem214	UTR3
10	57532365	57532479	7.06674	117.583	112.565	ENSMUSG00000019877	Serinc1	Exon1
7	24104448	24104690	7.06573	34.5476	30.5296	ENSMUSG00000057101	Zfp180	LastExon
5	112391201	112391401	7.06229	25.5014	21.6928	ENSMUSG00000029348	Asphd2	Exon1
4	107247580	107247679	7.06229	25.5014	21.6928	ENSMUSG00000028617	Lrrc42	Exon2
9	101100610	101100916	7.06229	25.5014	21.6928	ENSMUSG00000066415	Msl2	LastExon
17	56576269	56576404	7.06229	25.5014	21.6928	ENSMUSG00000042625	Safb2	Intron6
19	12492295	12492395	7.06185	14.3239	10.3713	ENSMUSG00000039982	Dtx4	Exon2
10	85892945	85893280	7.06019	63.1354	58.6551	ENSMUSG00000035529	Prdm4	UTR3
14	20729669	20729799	7.05839	21.7097	18.0041	ENSMUSG00000039308	Ndst2	Exon3
17	47489119	47489804	7.05771	54.0578	49.7026	ENSMUSG00000023980	Taf8	UTR3
10	79675645	79676089	7.04674	74.9474	70.3214	ENSMUSG00000020308	Tpgs1	LastExon
8	124344014	124344138	7.04558	19.3339	15.698	ENSMUSG00000089704	Galnt2	UTR3
8	124344014	124344138	7.04558	19.3339	15.698	ENSMUSG00000092329	Gm20388	UTR3
9	120441355	120441509	7.04279	65.8696	61.3527	ENSMUSG00000041794	Myrip	Exon11
2	120745713	120746223	7.03861	26.8519	23.0092	ENSMUSG00000027284	Cdan1	Exon14
11	78009398	78009751	7.03861	26.8519	23.0092	ENSMUSG00000037791	Phf12	Exon4
17	86655339	86655934	7.03861	26.8519	23.0092	ENSMUSG00000045038	Prkce	UTR3
14	76417327	76417449	7.03861	26.8519	23.0092	ENSMUSG00000022010	Tsc22d1	Exon3
2	120745713	120746223	7.03861	26.8519	23.0092	ENSMUSG00000090100	Ttbk2	Exon15
1	36144059	36144243	7.03861	26.8519	23.0092	ENSMUSG00000037470	Uggt1	UTR3
11	120579149	120579285	7.03705	116.721	111.709	ENSMUSG00000025132	Arhgdia	UTR3
8	23132278	23132520	7.0334	21.1777	17.4888	ENSMUSG00000031543	Ank1	UTR3
16	16484126	16484529	7.03297	37.27	33.1976	ENSMUSG00000022788	Fgd4	Exon4
17	25782823	25783052	7.03297	37.27	33.1976	ENSMUSG00000061046	Haghl	LastExon
11	67683328	67683668	7.02566	182.095	176.696	ENSMUSG00000033066	Gas7	LastExon
10	79758634	79758961	7.01871	38.6332	34.534	ENSMUSG00000035890	Rnf126	UTR3
11	97500318	97500568	7.01785	28.2061	24.3293	ENSMUSG00000047988	4933428G20Rik	Intergenic
11	97500318	97500568	7.01785	28.2061	24.3293	ENSMUSG00000049807	Arhgap23	LastExon
6	120439014	120439243	7.01785	28.2061	24.3293	ENSMUSG00000030180	Kdm5a	LastExon
4	116089257	116089438	7.01785	28.2061	24.3293	ENSMUSG00000028703	Lrrc41	Exon4
8	102634071	102634596	7.01569	17.8745	14.2864	ENSMUSG00000031673	Cdh11	UTR3
5	140524655	140524906	7.01569	17.8745	14.2864	ENSMUSG00000036599	Chst12	LastExon
7	125880876	125881038	7.01569	17.8745	14.2864	ENSMUSG00000046182	Gsg1l	UTR3
9	57614156	57614256	7.01569	17.8745	14.2864	ENSMUSG00000056271	Lman1l	Intron4
3	104457698	104457958	7.01569	17.8745	14.2864	ENSMUSG00000032913	Lrig2	UTR3
10	63321748	63321935	7.01569	17.8745	14.2864	ENSMUSG00000020063	Sirt1	Exon13
5	38136454	38136616	7.01569	17.8745	14.2864	ENSMUSG00000029125	Stx18	UTR3
4	128773898	128774352	7.01569	17.8745	14.2864	ENSMUSG00000028799	Zfp362	UTR3
7	29915345	29915725	7.01569	17.8745	14.2864	ENSMUSG00000099689	Zfp383	UTR3
6	48024485	48024729	7.01569	17.8745	14.2864	ENSMUSG00000071477	Zfp777	UTR3
17	32819216	32819437	7.01569	17.8745	14.2864	ENSMUSG00000095253	Zfp799	UTR3
17	74579868	74580455	7.00916	26.7617	22.9212	ENSMUSG00000024073	Birc6	Exon9
14	20387955	20388201	7.00578	34.788	30.7653	ENSMUSG00000021811	Dnajc9	Exon3
8	111033934	111034061	7.00562	39.9973	35.8735	ENSMUSG00000031960	Aars	UTR5
5	143563229	143563437	7.00562	39.9973	35.8735	ENSMUSG00000083012	Fam220a	LastExon
7	34639625	34640406	6.9995	29.5632	25.654	ENSMUSG00000030499	Kctd15	UTR3
10	74645523	74646073	6.99946	51.8109	47.4901	ENSMUSG00000052613	Pcdh15	LastExon
2	153316794	153317272	6.99945	74.0779	69.4617	ENSMUSG00000027475	Kif3b	Exon2
10	81148228	81148539	6.99945	74.0779	69.4617	ENSMUSG00000035011	Zbtb7a	LastExon
8	60672056	60672225	6.99688	23.4306	19.6763	ENSMUSG00000031647	Mfap3l	UTR3
4	129219054	129219200	6.99669	31.443	27.4917	ENSMUSG00000028811	Yars	UTR3
5	129502470	129502795	6.99357	41.3623	37.2133	ENSMUSG00000029439	Sfswap	Exon1
X	150645753	150646593	6.99357	41.3623	37.2133	ENSMUSG00000025272	Tro	Exon12
3	90489297	90489425	6.99156	25.2955	21.4918	ENSMUSG00000001018	Snapin	UTR3
2	172376025	172376118	6.98872	17.3569	13.7848	ENSMUSG00000027498	Cstf1	Exon4
16	85862273	85862454	6.98499	19.1967	15.5681	ENSMUSG00000022894	Adamts5	UTR3
16	30600816	30600993	6.98499	19.1967	15.5681	ENSMUSG00000046546	Fam43a	LastExon
5	140327884	140328120	6.98499	19.1967	15.5681	ENSMUSG00000029557	Mrm2	UTR3
16	17572990	17573164	6.98499	19.1967	15.5681	ENSMUSG00000022758	P2rx6	Intron11
6	127689762	127689878	6.98499	19.1967	15.5681	ENSMUSG00000030350	Prmt8	UTR3
16	17572990	17573164	6.98499	19.1967	15.5681	ENSMUSG00000022756	Slc7a4	UTR3
16	64783041	64783146	6.98499	19.1967	15.5681	ENSMUSG00000047141	Zfp654	UTR3
X	166457722	166458244	6.98316	30.9226	26.9834	ENSMUSG00000079316	Rab9	LastExon
4	34805431	34805694	6.98316	30.9226	26.9834	ENSMUSG00000039967	Zfp292	LastExon
13	115088648	115088875	6.97961	20.1135	16.4551	ENSMUSG00000114470	Gm49395	UTR3
13	115088648	115088875	6.97961	20.1135	16.4551	ENSMUSG00000042284	Itga1	Intron1
13	115088648	115088875	6.97961	20.1135	16.4551	ENSMUSG00000042275	Pelo	LastExon
5	127783634	127784802	6.97961	20.1135	16.4551	ENSMUSG00000034310	Tmem132d	UTR3
10	40479787	40480002	6.97601	33.7266	29.7267	ENSMUSG00000038481	Cdk19	LastExon
17	29831753	29832205	6.97515	21.9679	18.2544	ENSMUSG00000043557	Mdga1	UTR3
15	75947170	75947729	6.97326	22.8982	19.1586	ENSMUSG00000050846	Zfp623	UTR5
16	8855846	8856056	6.96852	32.2839	28.3147	ENSMUSG00000022507	1810013L24Rik	LastExon
18	53709059	53709251	6.96852	32.2839	28.3147	ENSMUSG00000048799	Cep120	Intron15
5	33855286	33855518	6.96852	32.2839	28.3147	ENSMUSG00000057406	Nsd2	Exon4
17	35164774	35164870	6.96852	32.2839	28.3147	ENSMUSG00000024393	Prrc2a	UTR5
2	37797424	37797732	6.96606	27.5689	23.7076	ENSMUSG00000035403	Crb2	UTR3
13	9665985	9666189	6.95977	20.5311	16.8601	ENSMUSG00000048264	Dip2c	LastExon
10	80381007	80381342	6.95977	20.5311	16.8601	ENSMUSG00000048696	Mex3d	UTR3
X	169927474	169927638	6.95977	20.5311	16.8601	ENSMUSG00000035299	Mid1	Exon2
14	65931065	65931184	6.95977	20.5311	16.8601	ENSMUSG00000034463	Scara3	Exon5
4	141517026	141517331	6.95977	20.5311	16.8601	ENSMUSG00000040761	Spen	Exon3
1	161019786	161019936	6.95977	20.5311	16.8601	ENSMUSG00000043467	Zbtb37	UTR3
16	17154053	17154156	6.95532	33.6467	29.6482	ENSMUSG00000041774	Ydjc	Intron5
11	67707767	67708055	6.95433	104.804	99.8846	ENSMUSG00000049928	Glp2r	UTR3
11	50899928	50900527	6.95147	18.6586	15.047	ENSMUSG00000049321	Zfp2	LastExon
3	95764675	95764880	6.94805	23.2977	19.5471	ENSMUSG00000028106	Rprd2	LastExon
5	145244790	145245055	6.94805	23.2977	19.5471	ENSMUSG00000007812	Zfp655	UTR3
17	46801006	46801757	6.94669	26.1009	22.2772	ENSMUSG00000036568	Bicral	UTR3
15	76644336	76644460	6.94669	26.1009	22.2772	ENSMUSG00000053929	Cyhr1	UTR3
6	119350412	119351047	6.94354	210.516	204.984	ENSMUSG00000041460	Cacna2d4	UTR3
16	35697484	35697965	6.94337	35.0108	30.9832	ENSMUSG00000022848	Dirc2	UTR3
2	165289950	165290529	6.94337	35.0108	30.9832	ENSMUSG00000017670	Elmo2	UTR3
10	80382051	80382365	6.94337	35.0108	30.9832	ENSMUSG00000048696	Mex3d	LastExon
14	51911485	51911579	6.94337	35.0108	30.9832	ENSMUSG00000004558	Ndrg2	Exon2
4	102604985	102605720	6.94337	35.0108	30.9832	ENSMUSG00000028525	Pde4b	LastExon
13	19149882	19150084	6.94109	59.9407	55.502	ENSMUSG00000021314	Amph	UTR3
7	98715266	98715600	6.94023	62.7586	58.2828	ENSMUSG00000030753	Thap12	LastExon
9	101923178	101923523	6.93866	21.874	18.1633	ENSMUSG00000057710	9630041A04Rik	Intron1
9	101923178	101923523	6.93866	21.874	18.1633	ENSMUSG00000032537	Ephb1	UTR3
19	4002173	4002267	6.93866	21.874	18.1633	ENSMUSG00000024869	Gm49405	UTR3
8	33776459	33776572	6.93866	21.874	18.1633	ENSMUSG00000031585	Gtf2e2	LastExon
1	16105683	16106066	6.93866	21.874	18.1633	ENSMUSG00000025921	Rdh10	UTR5
15	35910517	35910647	6.93866	21.874	18.1633	ENSMUSG00000037646	Vps13b	Exon56
18	73738802	73739207	6.93748	49.5653	45.2804	ENSMUSG00000036941	Elac1	UTR3
12	78964280	78964824	6.93719	77.3203	72.6686	ENSMUSG00000046157	Tmem229b	UTR3
2	129810583	129811193	6.93109	150.1	144.867	ENSMUSG00000037885	Stk35	LastIntron
11	94213672	94214364	6.93097	44.3576	40.1583	ENSMUSG00000037573	Tob1	LastExon
7	44461559	44462425	6.92817	32.1341	28.1681	ENSMUSG00000047085	Lrrc4b	LastExon
11	3913714	3913833	6.92586	26.5051	22.6701	ENSMUSG00000048807	Slc35e4	UTR5
11	97337016	97337933	6.92367	66.8675	62.3377	ENSMUSG00000070337	Gpr179	LastExon
7	44357136	44357631	6.92282	21.8331	18.1243	ENSMUSG00000038738	Shank1	LastExon
1	55078246	55078370	6.92256	37.7422	33.66	ENSMUSG00000025980	Hspd1	UTR3
5	143563768	143563873	6.9211	19.9746	16.321	ENSMUSG00000083012	Fam220a	UTR3
4	42943103	42943212	6.9211	19.9746	16.321	ENSMUSG00000036062	Phf24	UTR3
8	27396780	27397111	6.92075	23.2232	19.4745	ENSMUSG00000031492	Chrnb3	LastExon
10	14149336	14149729	6.92075	23.2232	19.4745	ENSMUSG00000015501	Hivep2	LastExon
6	145817986	145818117	6.92075	23.2232	19.4745	ENSMUSG00000030259	Rassf8	UTR3
16	3984990	3985139	6.92075	23.2232	19.4745	ENSMUSG00000039738	Slx4	Exon11
11	60784317	60784604	6.92075	23.2232	19.4745	ENSMUSG00000049323	Smcr8	UTR3
6	116134215	116134361	6.92075	23.2232	19.4745	ENSMUSG00000030126	Tmcc1	Exon3
9	118555630	118556177	6.92009	45.7105	41.4894	ENSMUSG00000038708	Golga4	Exon15
6	97288063	97288432	6.9168	53.6722	49.323	ENSMUSG00000030064	Frmd4b	UTR3
2	20881083	20881312	6.91508	36.303	32.2498	ENSMUSG00000036591	Arhgap21	Exon9
11	88981891	88982067	6.91344	39.109	35.0013	ENSMUSG00000033983	Coil	Exon6
3	123114188	123114459	6.91344	39.109	35.0013	ENSMUSG00000050315	Synpo2	LastExon
8	13286771	13287304	6.90926	70.9775	66.3972	ENSMUSG00000038506	Dcun1d2	Intron1
15	74588692	74589290	6.90777	102.842	97.94	ENSMUSG00000034730	Adgrb1	LastExon
2	25576919	25577029	6.90682	18.559	14.9494	ENSMUSG00000029419	Ajm1	UTR3
7	131343519	131343801	6.90535	24.577	20.7921	ENSMUSG00000040177	2310057M21Rik	UTR3
9	122929664	122929909	6.90535	24.577	20.7921	ENSMUSG00000057895	Zfp105	LastExon
9	20499973	20500455	6.90535	24.577	20.7921	ENSMUSG00000060510	Zfp266	LastExon
5	86037363	86037617	6.90504	40.4766	36.3439	ENSMUSG00000029253	Cenpc1	Exon8
4	151983038	151983230	6.90504	40.4766	36.3439	ENSMUSG00000039759	Thap3	UTR3
11	98158124	98158281	6.90321	25.0365	21.2391	ENSMUSG00000018160	Med1	LastExon
11	96065198	96065290	6.90163	24.1009	20.3287	ENSMUSG00000014349	Ube2z	Exon1
1	72428840	72428974	6.90093	16.2661	12.7303	ENSMUSG00000039372	2020-03-04	LastExon
X	144162556	144162681	6.90093	16.2661	12.7303	ENSMUSG00000085139	A730046J19Rik	UTR5
1	136346009	136346103	6.90093	16.2661	12.7303	ENSMUSG00000041570	Camsap2	UTR5
4	108338719	108338864	6.90093	16.2661	12.7303	ENSMUSG00000048351	Coa7	UTR3
14	98168490	98168809	6.90093	16.2661	12.7303	ENSMUSG00000055639	Dach1	Exon1
10	11289515	11289612	6.90093	16.2661	12.7303	ENSMUSG00000047648	Fbxo30	UTR5
5	150496554	150496688	6.90093	16.2661	12.7303	ENSMUSG00000056602	Fry	UTR3
11	42626528	42626620	6.90093	16.2661	12.7303	ENSMUSG00000007653	Gabrb2	LastExon
1	87423189	87423281	6.90093	16.2661	12.7303	ENSMUSG00000048000	Gigyf2	Exon19
8	123839521	123839620	6.90093	16.2661	12.7303	ENSMUSG00000092329	Gm20388	Intron1
18	37696244	37696510	6.90093	16.2661	12.7303	ENSMUSG00000102836	Gm37013	Intron1
18	37696244	37696510	6.90093	16.2661	12.7303	ENSMUSG00000103125	Gm37388	Intron1
18	37696244	37696510	6.90093	16.2661	12.7303	ENSMUSG00000103458	Gm42416	Intron1
7	66049175	66049615	6.90093	16.2661	12.7303	ENSMUSG00000108793	Gm45213	LastIntron
4	4767594	4767870	6.90093	16.2661	12.7303	ENSMUSG00000066324	Impad1	UTR3
3	87174586	87174678	6.90093	16.2661	12.7303	ENSMUSG00000041734	Kirrel	UTR5
5	65167087	65167311	6.90093	16.2661	12.7303	ENSMUSG00000054920	Klhl5	UTR3
10	76556597	76556732	6.90093	16.2661	12.7303	ENSMUSG00000033105	Lss	LastExon
16	21927993	21928501	6.90093	16.2661	12.7303	ENSMUSG00000033618	Map3k13	LastExon
7	82867728	82867876	6.90093	16.2661	12.7303	ENSMUSG00000057706	Mex3b	Exon1
19	60757017	60757432	6.90093	16.2661	12.7303	ENSMUSG00000072437	Nanos1	LastExon
18	86498699	86498901	6.90093	16.2661	12.7303	ENSMUSG00000050321	Neto1	Exon9
4	41124167	41124259	6.90093	16.2661	12.7303	ENSMUSG00000028430	Nol6	Exon1
11	76258521	76258625	6.90093	16.2661	12.7303	ENSMUSG00000020844	Nxn	UTR3
10	128303348	128303440	6.90093	16.2661	12.7303	ENSMUSG00000005682	Pan2	Exon1
18	37696244	37696510	6.90093	16.2661	12.7303	ENSMUSG00000103144	Pcdhga1	Intron1
18	37696244	37696510	6.90093	16.2661	12.7303	ENSMUSG00000103332	Pcdhga2	Intron1
18	37696244	37696510	6.90093	16.2661	12.7303	ENSMUSG00000104346	Pcdhga3	Intron1
18	37696244	37696510	6.90093	16.2661	12.7303	ENSMUSG00000103677	Pcdhga4	Intron1
18	37696244	37696510	6.90093	16.2661	12.7303	ENSMUSG00000103567	Pcdhga5	Exon1
18	37696244	37696510	6.90093	16.2661	12.7303	ENSMUSG00000103037	Pcdhgb1	Intron1
18	37696244	37696510	6.90093	16.2661	12.7303	ENSMUSG00000102748	Pcdhgb2	Intron1
7	66049175	66049615	6.90093	16.2661	12.7303	ENSMUSG00000030513	Pcsk6	UTR3
1	91416969	91417064	6.90093	16.2661	12.7303	ENSMUSG00000055866	Per2	UTR3
2	178328101	178328193	6.90093	16.2661	12.7303	ENSMUSG00000027525	Phactr3	Exon9
1	42698860	42699026	6.90093	16.2661	12.7303	ENSMUSG00000045515	Pou3f3	UTR3
17	86996883	86997102	6.90093	16.2661	12.7303	ENSMUSG00000024143	Rhoq	LastExon
5	30267015	30267146	6.90093	16.2661	12.7303	ENSMUSG00000075703	Selenoi	UTR3
2	137067958	137068056	6.90093	16.2661	12.7303	ENSMUSG00000027281	Slx4ip	LastExon
18	88869176	88869433	6.90093	16.2661	12.7303	ENSMUSG00000056153	Socs6	UTR3
12	91647286	91647455	6.90093	16.2661	12.7303	ENSMUSG00000020961	Ston2	Exon5
14	55097395	55097552	6.90093	16.2661	12.7303	ENSMUSG00000045691	Thtpa	LastExon
7	6963777	6963893	6.90093	16.2661	12.7303	ENSMUSG00000051527	Usp29	UTR3
10	4368515	4368782	6.90093	16.2661	12.7303	ENSMUSG00000075327	Zbtb2	LastExon
13	67668443	67668584	6.90093	16.2661	12.7303	ENSMUSG00000048280	Zfp738	UTR3
17	33242410	33242637	6.90093	16.2661	12.7303	ENSMUSG00000094441	Zfp955a	LastExon
8	4629024	4629188	6.90093	16.2661	12.7303	ENSMUSG00000058748	Zfp958	LastExon
6	8509027	8509219	6.89989	23.1661	19.4194	ENSMUSG00000107705	Gm45062	Intron4
10	130270934	130271189	6.89946	57.7812	53.3724	ENSMUSG00000048015	Neurod4	LastExon
9	66040718	66041001	6.89729	41.8447	37.6875	ENSMUSG00000032384	Csnk1g1	UTR3
7	64871980	64872451	6.89729	41.8447	37.6875	ENSMUSG00000030518	Fam189a1	Intron2
8	60671342	60671923	6.89729	41.8447	37.6875	ENSMUSG00000031647	Mfap3l	LastExon
7	64871980	64872451	6.89729	41.8447	37.6875	ENSMUSG00000070520	Nsmce3	UTR3
2	118792001	118792144	6.89673	32.9519	28.9675	ENSMUSG00000040035	Disp2	LastExon
2	129133894	129134009	6.89349	20.3701	16.7032	ENSMUSG00000037938	Chchd5	UTR3
18	37656642	37656929	6.89349	20.3701	16.7032	ENSMUSG00000102836	Gm37013	Intron1
18	37656642	37656929	6.89349	20.3701	16.7032	ENSMUSG00000103125	Gm37388	Intron1
18	37656642	37656929	6.89349	20.3701	16.7032	ENSMUSG00000103458	Gm42416	Intron1
15	72806621	72808241	6.89272	76.4589	71.8155	ENSMUSG00000047921	Trappc9	LastIntron
2	129688133	129688278	6.89197	25.9344	22.1143	ENSMUSG00000027400	Pdyn	LastExon
5	149193949	149194049	6.88786	18.5165	14.9076	ENSMUSG00000041264	Uspl1	Exon1
4	101153080	101153246	6.88471	61.8919	57.4272	ENSMUSG00000028530	Jak1	UTR3
8	11561543	11562420	6.88086	57.1897	52.7893	ENSMUSG00000045969	Ing1	LastExon
7	67226295	67226696	6.88024	27.2945	23.4402	ENSMUSG00000043831	Lysmd4	UTR3
6	39336926	39337252	6.88024	27.2945	23.4402	ENSMUSG00000029924	Slc37a3	UTR3
10	94579129	94579255	6.88024	27.2945	23.4402	ENSMUSG00000020023	Tmcc3	Exon2
18	24284693	24285114	6.8772	45.9516	41.7251	ENSMUSG00000000420	Galnt1	LastExon
17	24895954	24896182	6.872	66.0036	61.485	ENSMUSG00000024163	Mapk8ip3	UTR3
17	24895954	24896182	6.872	66.0036	61.485	ENSMUSG00000038880	Mrps34	Exon3
8	107045073	107045359	6.87139	47.3213	43.0723	ENSMUSG00000031913	Vps4a	LastExon
4	99258448	99258769	6.86987	28.6567	24.7697	ENSMUSG00000028550	Atg4c	LastExon
8	107052394	107052710	6.86987	28.6567	24.7697	ENSMUSG00000031916	Cog8	Exon3
8	71351873	71351987	6.86987	28.6567	24.7697	ENSMUSG00000004677	Myo9b	Exon25
1	52159450	52159659	6.86987	28.6567	24.7697	ENSMUSG00000026104	Stat1	UTR3
11	43704862	43705117	6.86815	67.3743	62.8388	ENSMUSG00000044950	Pwwp2a	LastExon
3	32462629	32462993	6.86646	87.425	82.6711	ENSMUSG00000027665	Pik3ca	LastExon
2	37797899	37797997	6.86614	26.7844	22.9437	ENSMUSG00000035403	Crb2	UTR3
1	125435533	125435645	6.86429	31.8958	27.374	ENSMUSG00000026341	Actr3	Intergenic
7	12809786	12811359	6.86314	25.8463	22.0285	ENSMUSG00000057894	Zfp329	UTR3
13	119699848	119700039	6.86086	50.0614	45.7682	ENSMUSG00000093930	Hmgcs1	Exon3
9	32256916	32257158	6.86064	30.0207	26.1019	ENSMUSG00000041444	Arhgap32	Exon21
5	107506914	107507119	6.86064	30.0207	26.1019	ENSMUSG00000111375	Btbd8	Exon17
12	112738626	112739338	6.86064	30.0207	26.1019	ENSMUSG00000072825	Cep170b	Exon12
1	180866059	180866257	6.86064	30.0207	26.1019	ENSMUSG00000038806	Sde2	LastExon
2	61649921	61650167	6.86064	30.0207	26.1019	ENSMUSG00000064289	Tank	LastExon
10	79526710	79527059	6.86036	30.9502	27.0107	ENSMUSG00000052151	Plpp2	UTR3
17	71750786	71751273	6.85635	340.15	334.093	ENSMUSG00000044375	Pcare	Exon1
9	108490713	108490850	6.85606	51.4318	47.1168	ENSMUSG00000006676	Usp19	UTR5
10	75182301	75182629	6.85237	31.3861	27.4371	ENSMUSG00000009681	Bcr	LastExon
11	75705500	75705732	6.85237	31.3861	27.4371	ENSMUSG00000017776	Crk	UTR3
3	103353770	103354142	6.85237	31.3861	27.4371	ENSMUSG00000033014	Trim33	LastExon
2	69824686	69824807	6.85157	28.1306	24.2559	ENSMUSG00000042155	Klhl23	Exon2
2	129810583	129811193	6.84909	118.439	113.414	ENSMUSG00000037885	Stk35	LastIntron
2	128610961	128611711	6.84492	32.7526	28.7725	ENSMUSG00000014355	Anapc1	UTR3
15	98135868	98136409	6.84492	32.7526	28.7725	ENSMUSG00000048175	Asb8	LastExon
11	80478544	80478719	6.84451	26.2525	22.4244	ENSMUSG00000048895	Cdk5r1	UTR3
8	83271113	83271581	6.84327	55.544	51.1672	ENSMUSG00000031709	Tbc1d9	LastExon
16	64766129	64766595	6.84114	16.1462	12.6175	ENSMUSG00000059920	4930453N24Rik	UTR3
X	153140312	153140530	6.83947	56.915	52.5184	ENSMUSG00000041658	Rragb	UTR5
2	151594320	151594620	6.83619	24.3763	20.5971	ENSMUSG00000027457	Snph	LastExon
19	4097349	4097461	6.83586	58.2861	53.8693	ENSMUSG00000024856	Cdk2ap2	Exon1
10	118859502	118860394	6.83497	82.4567	77.7524	ENSMUSG00000028630	Dyrk2	UTR3
3	107331631	107332184	6.83209	19.3043	15.6699	ENSMUSG00000048109	Rbm15	LastExon
8	105702926	105703075	6.83203	35.4883	31.4514	ENSMUSG00000005699	Pard6a	LastExon
4	144927306	144927437	6.82674	26.6596	22.8219	ENSMUSG00000066026	Dhrs3	UTR3
1	38088023	38088689	6.82541	18.3763	14.771	ENSMUSG00000026082	Rev1	Exon6
2	44996237	44996363	6.82541	18.3763	14.771	ENSMUSG00000026872	Zeb2	Exon9
18	56575492	56576030	6.82431	114.848	109.849	ENSMUSG00000008301	Phax	Exon2
10	67218939	67219665	6.82403	34.0632	30.0548	ENSMUSG00000037876	Jmjd1c	Exon7
5	30507135	30507483	6.82126	38.2265	34.1355	ENSMUSG00000053194	Cib4	Intron3
8	124910439	124910741	6.82126	38.2265	34.1355	ENSMUSG00000031987	Egln1	UTR3
11	58058664	58058851	6.82126	38.2265	34.1355	ENSMUSG00000037331	Larp1	LastExon
8	107011314	107011502	6.82126	38.2265	34.1355	ENSMUSG00000041308	Sntb2	LastExon
16	96002159	96002781	6.81831	36.3581	32.3036	ENSMUSG00000022914	Brwd1	UTR3
4	133680609	133681980	6.8175	51.2001	46.89	ENSMUSG00000007880	Arid1a	LastExon
10	128327088	128327182	6.81652	39.5963	35.4798	ENSMUSG00000025381	Cnpy2	UTR3
8	95278238	95278330	6.81282	97.5427	92.6895	ENSMUSG00000031789	Cngb1	Exon15
3	88568765	88569035	6.81214	40.9665	36.8251	ENSMUSG00000008604	Ubqln4	UTR3
13	70604152	70604425	6.81176	52.5567	48.2252	ENSMUSG00000034525	Ice1	Exon13
5	14700073	14700234	6.81107	35.8637	31.8194	ENSMUSG00000061601	Pclo	Intron6
9	120933501	120933639	6.81027	70.6294	66.0534	ENSMUSG00000006932	Ctnnb1	UTR5
10	84374070	84374218	6.80911	16.5306	12.9862	ENSMUSG00000020032	Nuak1	UTR3
2	153330524	153330666	6.80841	30.2981	26.3722	ENSMUSG00000027475	Kif3b	UTR3
[truncated: 12,042 more rows]

## Sheet: p7 retina
Chromosome	PeakStart	PeakEnd	Gene_ENSEMBL	-LOG10(pvalue)	-LOG10(fdr)	PeakFoldEnrichment	Gene_Symbol
3	31097769	31098488	ENSMUSG00000027660	-25.4	-23.7	84.4	Skil
2	25929446	25929987	ENSMUSG00000026933	-181	-177	77.5	Camsap1
5	104065049	104065379	ENSMUSG00000029310	-38.5	-36.5	76	Nudt9
4	62690183	62690453	ENSMUSG00000059810	-31.2	-29.3	61.4	Rgs3
4	43017634	43017964	ENSMUSG00000028454	-49.8	-47.5	61.4	Pigo
19	52948660	52991428	ENSMUSG00000025027	-26.8	-25	58.3	Xpnpep1
2	25245478	25245838	ENSMUSG00000006471	-18.2	-16.7	52.2	Ndor1
14	104479782	104480053	ENSMUSG00000022120	-30	-28.2	51.8	Rnf219
17	12974651	12974921	ENSMUSG00000060475	-14.8	-13.4	50.7	Wtap
18	65427468	65427611	ENSMUSG00000093283	-14.8	-13.4	50.7	--
2	25245470	25245826	ENSMUSG00000115018	-17.6	-16	47.6	AL732309.1
7	16985363	16985664	ENSMUSG00000108348	-13.9	-12.4	47.6	Gm42372
2	156853615	156853944	ENSMUSG00000085741	-32.7	-30.8	47.2	--
6	119572113	119572714	ENSMUSG00000030172	-14.3	-12.9	46.8	Erc1
18	77150087	77153082	ENSMUSG00000025423	-49.6	-47.4	46.8	Pias2
12	113189166	113189404	ENSMUSG00000049036	-13.4	-12	46.1	Tmem121
7	6379020	6379619	ENSMUSG00000055150	-17.5	-16	45.3	Zfp78
8	22482887	22483125	ENSMUSG00000097042	-14.4	-13	45.3	--
2	25245492	25245823	ENSMUSG00000115074	-18.5	-16.9	43.8	Ndor1
11	69879248	69879789	ENSMUSG00000046731	-12.6	-11.3	43.8	Kctd11
17	5341775	5343216	ENSMUSG00000069729	-70.8	-68.3	43.4	Arid1b
1	156641528	156641799	ENSMUSG00000026596	-14.3	-12.9	42.2	Abl2
2	156853624	156853954	ENSMUSG00000062175	-31.6	-29.7	42.2	Tgif2
7	124396843	124397440	ENSMUSG00000078591	-23.5	-21.9	42.2	Hs3st4
9	108051453	108051753	ENSMUSG00000070284	-13.1	-11.7	42.2	Gmppb
3	57833209	57833703	ENSMUSG00000036503	-23.7	-22	41.5	Rnf13
5	37424485	37424756	ENSMUSG00000050248	-11.9	-10.6	41.5	Evc2
1	60488254	60488495	ENSMUSG00000026014	-11.7	-10.3	40.7	Raph1
3	96683936	96684354	ENSMUSG00000038354	-14	-12.5	39.9	Ankrd35
11	58879930	58880530	ENSMUSG00000020491	-11.5	-10.1	39.9	2810021J22Rik
13	55472887	55473124	ENSMUSG00000034686	-13.8	-12.4	39.9	Prr7
7	4478724	4479262	ENSMUSG00000006154	-22.1	-20.5	39.1	Eps8l1
7	98701969	98702299	ENSMUSG00000086477	-11.9	-10.6	39.1	--
12	111573736	111574284	ENSMUSG00000096995	-22.4	-20.7	39.1	--
16	33766754	33767144	ENSMUSG00000075254	-31.7	-29.8	38.8	Heg1
18	61697163	61697461	ENSMUSG00000024579	-44.7	-42.6	38.8	Pcyox1l
2	37797398	37798864	ENSMUSG00000035403	-42	-39.9	37.6	Crb2
7	4427465	4427765	ENSMUSG00000008435	-25.1	-23.4	37.6	Rdh13
1	133136761	133136972	ENSMUSG00000046062	-17.6	-16.1	36.8	Ppp1r15b
5	130840223	130840733	ENSMUSG00000060371	-10.5	-9.19	36.8	Caln1
9	65958437	65958647	ENSMUSG00000032384	-10.5	-9.19	36.8	Csnk1g1
1	66801553	66801822	ENSMUSG00000026004	-14.2	-12.8	36.1	Kansl1l
8	90247758	90248418	ENSMUSG00000043668	-25.7	-23.9	36.1	Tox3
9	15332748	15332899	ENSMUSG00000046111	-10	-8.73	35.3	Cep295
12	110319591	110319824	ENSMUSG00000113512	-21.2	-19.5	35.3	--
16	4288215	4288395	ENSMUSG00000005580	-10	-8.73	35.3	Adcy9
8	109731726	109732237	ENSMUSG00000069895	-12.8	-11.5	35.3	Atxn1l
8	60671301	60672292	ENSMUSG00000031647	-40	-38	34.9	Mfap3l
5	143330924	143332704	ENSMUSG00000089889	-16.2	-14.7	34.5	--
5	143925336	143925636	ENSMUSG00000079109	-9.79	-8.5	34.5	Pms2
17	16972574	16973679	ENSMUSG00000060149	-19.1	-17.5	34.2	--
4	13890327	13890538	ENSMUSG00000006586	-18.8	-17.2	33.8	Runx1t1
8	27121460	27121761	ENSMUSG00000031486	-9.31	-8.05	33	Adgra2
10	3963442	3963712	ENSMUSG00000040624	-13.8	-12.4	33	Plekhg1
11	78037180	78037866	ENSMUSG00000020834	-24.8	-23.1	33	Dhrs13
14	45657483	45657903	ENSMUSG00000037697	-13.3	-11.9	33	Ddhd1
17	5841328	5841538	ENSMUSG00000002365	-10.8	-9.51	33	Snx9
17	71273756	71273967	ENSMUSG00000024053	-9.31	-8.05	33	Emilin2
X	152909625	152909888	ENSMUSG00000095597	-25.7	-23.9	33	--
3	19896090	19896270	ENSMUSG00000048106	-9.31	-8.05	33	--
3	148816540	148816721	ENSMUSG00000028184	-9.08	-7.82	32.2	Adgrl2
9	14781263	14781564	ENSMUSG00000031931	-17.9	-16.3	32.2	Ankrd49
15	89429915	89430065	ENSMUSG00000079242	-9.08	-7.82	32.2	C730034F03Rik
18	37021856	37022097	ENSMUSG00000103310	-9.68	-8.4	32.2	Pcdha12
X	152909622	152909889	ENSMUSG00000095597	-27.4	-25.6	32.2	--
4	132204156	132205084	ENSMUSG00000040025	-53.3	-51	31.5	Ythdf2
8	125672198	125672556	ENSMUSG00000050930	-10.6	-9.32	31.5	Map10
9	63648503	63648894	ENSMUSG00000032402	-8.84	-7.59	31.5	Smad3
10	86834386	86834895	ENSMUSG00000054027	-14.9	-13.4	31.5	Nt5dc3
12	69189896	69190197	ENSMUSG00000020973	-17.4	-15.9	31.5	Dnaaf2
12	69189897	69190193	ENSMUSG00000113786	-17.4	-15.9	31.5	Gm49384
8	115707043	115707584	ENSMUSG00000055435	-25	-23.2	31.5	Maf
15	98169538	98169747	ENSMUSG00000029875	-17.2	-15.6	31.1	Ccdc184
7	29893811	29894172	ENSMUSG00000062040	-16.9	-15.4	30.7	Zfp27
18	75368845	75369175	ENSMUSG00000025880	-20.2	-18.6	30.7	Smad7
2	119902666	119902906	ENSMUSG00000033943	-8.37	-7.14	29.9	Mga
4	120757972	120758270	ENSMUSG00000032897	-38.6	-36.5	29.9	Nfyc
13	67516138	67516378	ENSMUSG00000097333	-9.91	-8.63	29.9	Zfp87
8	110957162	110957610	ENSMUSG00000031749	-61.4	-59	29.8	St3gal2
6	125306659	125307286	ENSMUSG00000030339	-63.5	-61.1	29.6	Ltbr
11	75266155	75266813	ENSMUSG00000045287	-37.4	-35.4	29.4	Rtn4rl1
7	31069167	31069317	ENSMUSG00000036560	-8.13	-6.91	29.2	Lgi4
7	30355488	30355757	ENSMUSG00000036957	-16	-14.5	29.2	Lrfn3
8	33386324	33387133	ENSMUSG00000049184	-23	-21.3	29.2	Purg
10	58270660	58271051	ENSMUSG00000038039	-10.2	-8.93	29.2	Gcc2
11	59736048	59737295	ENSMUSG00000005417	-20	-18.4	29.2	Mprip
12	24655150	24655301	ENSMUSG00000020653	-8.13	-6.91	29.2	Klf11
X	105083123	105083452	ENSMUSG00000031226	-51.6	-49.4	29.2	Pbdc1
4	152026410	152026770	ENSMUSG00000028952	-30.8	-29	28.6	Zbtb48
10	84947603	84958048	ENSMUSG00000035620	-41	-39	28.6	Ric8b
1	16105773	16106103	ENSMUSG00000025921	-45	-42.8	28.4	Rdh10
2	178421308	178421489	ENSMUSG00000070476	-7.9	-6.69	28.4	Fam217b
13	104174224	104174405	ENSMUSG00000021711	-8.77	-7.52	28.4	Trappc13
14	20347850	20348121	ENSMUSG00000021810	-20.7	-19.1	28.4	Ecd
19	29312720	29312870	ENSMUSG00000024789	-7.9	-6.69	28.4	Jak2
1	74697622	74697832	ENSMUSG00000033257	-15.3	-13.8	28	Ttll4
15	84940277	84940546	ENSMUSG00000016619	-15.3	-13.8	28	Nup50
1	130690769	130691130	ENSMUSG00000026409	-15.1	-13.6	27.6	Pfkfb2
2	97630680	97630890	ENSMUSG00000050587	-10.6	-9.31	27.6	Lrrc4c
8	119597948	119598127	ENSMUSG00000031831	-7.81	-6.61	27.6	Dnaaf1
10	10688307	10688458	ENSMUSG00000019828	-7.66	-6.46	27.6	Grm1
11	94664029	94664898	ENSMUSG00000020868	-79.3	-76.7	27.6	Xylt2
15	95972740	95972891	ENSMUSG00000064210	-7.66	-6.46	27.6	Ano6
X	14839445	14839624	ENSMUSG00000084907	-7.66	-6.46	27.6	--
4	148102350	148102530	ENSMUSG00000029005	-7.42	-6.24	26.9	Draxin
7	31069159	31069309	ENSMUSG00000057092	-7.42	-6.24	26.9	Fxyd3
11	114864332	114864512	ENSMUSG00000051043	-7.42	-6.24	26.9	Gprc5c
11	75451003	75451423	ENSMUSG00000045374	-7.42	-6.24	26.9	Wdr81
17	45439700	45440000	ENSMUSG00000097119	-8.46	-7.22	26.9	--
3	101859552	101859793	ENSMUSG00000033147	-7.19	-6.01	26.1	Slc22a15
4	59899130	59899431	ENSMUSG00000028385	-12	-10.6	26.1	Snx30
4	120268444	120269129	ENSMUSG00000052135	-11.6	-10.2	26.1	Foxo6
5	121439839	121440380	ENSMUSG00000042719	-21	-19.3	26.1	Naa25
5	143714621	143716002	ENSMUSG00000051306	-39	-37	26.1	Usp42
6	77245134	77245402	ENSMUSG00000060780	-11	-9.66	26.1	Lrrtm1
7	12493594	12494255	ENSMUSG00000030386	-19.4	-17.9	26.1	Zfp606
9	57615991	57620626	ENSMUSG00000056271	-9.07	-7.81	26.1	Lman1l
17	33380844	33381055	ENSMUSG00000055240	-7.19	-6.01	26.1	Zfp101
18	37714964	37715174	ENSMUSG00000104512	-7.19	-6.01	26.1	--
X	103460395	103460755	ENSMUSG00000086503	-169	-165	26.1	--
8	45050817	45051297	ENSMUSG00000070047	-41.2	-39.1	26	Fat1
2	138284147	138284477	ENSMUSG00000062098	-33.8	-31.9	25.9	Btbd3
3	123110990	123111231	ENSMUSG00000050315	-16.7	-15.2	25.7	Synpo2
4	138394150	138394359	ENSMUSG00000078235	-9.91	-8.63	25.3	Fam43b
5	110657797	110657977	ENSMUSG00000029504	-6.96	-5.79	25.3	Ddx51
5	138170618	138171066	ENSMUSG00000029730	-20.9	-19.3	25.3	Mcm7
8	124520766	124520946	ENSMUSG00000031979	-6.96	-5.79	25.3	Cog2
11	75768965	75769623	ENSMUSG00000020848	-17.5	-15.9	25.3	Doc2b
16	4624713	4624864	ENSMUSG00000014303	-6.96	-5.79	25.3	Glis2
16	4624720	4624869	ENSMUSG00000014301	-6.96	-5.79	25.3	Pam16
17	14196516	14196905	ENSMUSG00000048826	-6.96	-5.79	25.3	Dact2
18	80127861	80128190	ENSMUSG00000053950	-41.4	-39.3	25.3	Adnp2
7	15971690	15972470	ENSMUSG00000070808	-46.4	-44.2	25.2	Bicra
1	42698856	42699097	ENSMUSG00000045515	-6.73	-5.58	24.6	Pou3f3
1	74303914	74304095	ENSMUSG00000006301	-6.72	-5.57	24.6	Tmbim1
2	119334677	119334887	ENSMUSG00000027314	-6.72	-5.57	24.6	Dll4
4	133664730	133664940	ENSMUSG00000043257	-8.76	-7.51	24.6	Pigv
8	70131270	70131420	ENSMUSG00000036120	-6.72	-5.57	24.6	Rfxank
10	41810233	41810594	ENSMUSG00000038332	-7.48	-6.29	24.6	Sesn1
10	127172121	127172330	ENSMUSG00000006731	-13	-11.6	24.6	B4galnt1
14	55871680	55872071	ENSMUSG00000075592	-18.5	-16.9	24.6	Nynrin
14	55871685	55872075	ENSMUSG00000097542	-18.9	-17.3	24.6	--
15	76910730	76911150	ENSMUSG00000054967	-11.4	-10.1	24.6	Zfp647
5	111420915	111421126	ENSMUSG00000070576	-10.4	-9.05	24.6	Mn1
8	91051277	91052117	ENSMUSG00000056608	-51	-48.8	24.4	Chd9
13	47244550	47245120	ENSMUSG00000038068	-39.3	-37.2	24.2	Rnf144b
1	89153184	89153663	ENSMUSG00000036206	-34.1	-32.2	24	Sh3bp4
2	152413087	152413208	ENSMUSG00000074682	-6.49	-5.34	23.8	Zcchc3
5	77282176	77282447	ENSMUSG00000029249	-8.77	-7.52	23.8	Rest
5	144174111	144174381	ENSMUSG00000038970	-11.3	-9.95	23.8	Lmtk2
7	15971882	15980864	ENSMUSG00000109984	-16.2	-14.7	23.8	--
7	45367682	45367948	ENSMUSG00000091510	-7.6	-6.4	23.8	--
10	88433747	88434016	ENSMUSG00000035311	-9.54	-8.26	23.8	Gnptab
11	21148078	21148648	ENSMUSG00000020134	-29.5	-27.7	23.8	Peli1
12	64967392	64970250	ENSMUSG00000035614	-31.4	-29.6	23.8	Togaram1
13	37951704	37951825	ENSMUSG00000039087	-6.49	-5.34	23.8	Rreb1
13	73604005	73604185	ENSMUSG00000021610	-10.1	-8.84	23.8	Clptm1l
15	6796235	6796865	ENSMUSG00000050310	-23	-21.3	23.8	Rictor
15	80930445	80930626	ENSMUSG00000047888	-6.49	-5.34	23.8	Tnrc6b
2	160949195	160956140	ENSMUSG00000057133	-114	-111	23.6	Chd6
8	70913699	70914059	ENSMUSG00000019261	-43.8	-41.7	23.6	Map1s
7	143847120	143847421	ENSMUSG00000058454	-13.9	-12.5	23.4	Dhcr7
9	106884262	106885547	ENSMUSG00000074102	-58.8	-56.5	23.4	Rbm15b
9	66040757	66041028	ENSMUSG00000032384	-29	-27.2	23.3	Csnk1g1
1	4781883	4782094	ENSMUSG00000033845	-10.1	-8.85	23	Mrpl15
2	92459155	92459364	ENSMUSG00000049922	-6.61	-5.46	23	Slc35c1
3	28668151	28668361	ENSMUSG00000027692	-6.56	-5.41	23	Tnik
3	145647420	145647659	ENSMUSG00000028195	-9.68	-8.4	23	Cyr61
5	147546014	147546224	ENSMUSG00000029647	-9.02	-7.76	23	Pan3
7	139941026	139941237	ENSMUSG00000066129	-6.25	-5.12	23	Kndc1
9	55004470	55004739	ENSMUSG00000035594	-19.4	-17.9	23	Chrna5
10	3963861	3964281	ENSMUSG00000040624	-8.31	-7.09	23	Plekhg1
11	53428925	53429044	ENSMUSG00000044894	-6.25	-5.12	23	Uqcrq
13	43668141	43668291	ENSMUSG00000044164	-6.25	-5.12	23	Rnf182
15	83547300	83547835	ENSMUSG00000048755	-22.8	-21.1	23	Mcat
X	106015699	106016112	ENSMUSG00000031231	-6.25	-5.12	23	Cox7b
2	140659682	140660101	ENSMUSG00000051379	-12	-10.6	22.6	Flrt3
3	9693585	9694035	ENSMUSG00000027508	-14.7	-13.2	22.6	Pag1
5	13599299	13599720	ENSMUSG00000028883	-28.2	-26.4	22.6	Sema3a
7	139875395	139875844	ENSMUSG00000025475	-14.9	-13.5	22.6	Adgra1
6	116406009	116406399	ENSMUSG00000025702	-53.1	-50.8	22.5	2022-03-08
2	168231547	168232146	ENSMUSG00000074576	-63.6	-61.2	22.4	Mocs3
2	122684826	122685187	ENSMUSG00000005802	-12.2	-10.9	22.3	Slc30a4
3	133109368	133109489	ENSMUSG00000028016	-10.4	-9.07	22.3	Ints12
3	96196733	96196939	ENSMUSG00000015943	-9.44	-8.17	22.3	Bola1
6	38533710	38534972	ENSMUSG00000019689	-12.2	-10.9	22.3	Fmc1
6	53817144	53817505	ENSMUSG00000043496	-6.02	-4.9	22.3	Tril
7	119785895	119786106	ENSMUSG00000030929	-11.8	-10.4	22.3	Eri2
8	25518814	25518995	ENSMUSG00000031565	-6.95	-5.79	22.3	Fgfr1
11	106398241	106398751	ENSMUSG00000020715	-13	-11.6	22.3	Ern1
12	85269144	85269355	ENSMUSG00000021245	-19.1	-17.6	22.3	Mlh3
13	54107683	54107893	ENSMUSG00000021474	-11.8	-10.4	22.3	Sfxn1
14	34374495	34374730	ENSMUSG00000023064	-10.2	-8.93	22.3	Sncg
14	70223667	70223817	ENSMUSG00000022092	-6.02	-4.9	22.3	Ppp3cc
16	18501478	18501658	ENSMUSG00000086965	-6.02	-4.9	22.3	Rtl10
16	21921906	21922057	ENSMUSG00000033618	-6.02	-4.9	22.3	Map3k13
16	55990378	55990649	ENSMUSG00000022601	-6.76	-5.6	22.3	Zbtb11
16	64766212	64766656	ENSMUSG00000059920	-17.8	-16.2	22.3	4930453N24Rik
19	41558435	41559066	ENSMUSG00000025019	-17.9	-16.3	22.3	Lcor
15	93500701	93503346	ENSMUSG00000036158	-34.2	-32.3	22.1	Prickle1
7	4921404	4921763	ENSMUSG00000074406	-35.3	-33.3	22	Zfp628
4	98934109	98934737	ENSMUSG00000028560	-64.7	-62.2	21.9	Usp1
8	35589590	35590159	ENSMUSG00000070056	-23.7	-22	21.9	Mfhas1
10	81262738	81263037	ENSMUSG00000004933	-16.7	-15.2	21.9	Matk
11	60740206	60740625	ENSMUSG00000002814	-13.9	-12.5	21.9	Top3a
13	57908211	57908332	ENSMUSG00000056222	-11.5	-10.2	21.9	Spock1
18	86718014	86718253	ENSMUSG00000024647	-11.5	-10.2	21.9	Cbln2
4	136637111	136637708	ENSMUSG00000070683	-116	-113	21.8	Lactbl1
1	190772978	190773639	ENSMUSG00000089872	-27.6	-25.8	21.7	Rps6kc1
2	167038131	167038462	ENSMUSG00000039501	-26.4	-24.7	21.7	Znfx1
4	11168007	11169943	ENSMUSG00000028211	-9.76	-8.47	21.5	Trp53inp1
4	62702235	62702445	ENSMUSG00000059810	-8.88	-7.63	21.5	Rgs3
4	143418853	143419153	ENSMUSG00000046862	-15.2	-13.7	21.5	Pramef8
4	108718649	108718889	ENSMUSG00000034557	-5.79	-4.68	21.5	Zfyve9
5	113942541	113942752	ENSMUSG00000042121	-5.79	-4.68	21.5	Ssh1
6	47820074	47820224	ENSMUSG00000051499	-6.5	-5.36	21.5	Zfp786
7	12907108	12907288	ENSMUSG00000054715	-6.5	-5.36	21.5	Zscan22
7	80892002	80892181	ENSMUSG00000025722	-6.55	-5.4	21.5	Wdr73
8	87773609	87780697	ENSMUSG00000045333	-7.22	-6.05	21.5	Zfp423
8	107076384	107079411	ENSMUSG00000031921	-63	-60.6	21.5	Terf2
9	14593509	14593690	ENSMUSG00000013076	-5.79	-4.68	21.5	Amotl1
9	57253744	57253984	ENSMUSG00000032300	-9.68	-8.4	21.5	1700017B05Rik
10	70024379	70024650	ENSMUSG00000069601	-25	-23.2	21.5	Ank3
10	68096321	68096442	ENSMUSG00000019947	-5.79	-4.68	21.5	Arid5b
11	49214883	49215966	ENSMUSG00000046311	-40.7	-38.6	21.5	Zfp62
11	54921045	54926716	ENSMUSG00000020400	-12.1	-10.8	21.5	Tnip1
11	113044103	113044223	ENSMUSG00000087259	-5.79	-4.68	21.5	--
13	96088340	96088521	ENSMUSG00000051111	-5.79	-4.68	21.5	Sv2c
18	49878855	49879066	ENSMUSG00000037416	-11.3	-9.96	21.5	Dmxl1
19	9893456	9893844	ENSMUSG00000024660	-16.7	-15.2	21.5	Incenp
4	12094807	12095316	ENSMUSG00000052137	-29.3	-27.4	21.3	Rbm12b2
4	34804941	34805692	ENSMUSG00000039967	-44.6	-42.4	21.2	Zfp292
1	172321040	172321250	ENSMUSG00000038026	-11.1	-9.74	21.1	Kcnj9
2	91720528	91720768	ENSMUSG00000027243	-11.4	-10	21.1	Harbi1
9	46281149	46281688	ENSMUSG00000032078	-31	-29.1	21.1	Zpr1
9	65185543	65185753	ENSMUSG00000032394	-11.1	-9.74	21.1	Igdcc3
13	14197624	14197895	ENSMUSG00000039219	-48.3	-46.1	21.1	Arid4b
17	34935564	34935804	ENSMUSG00000007038	-32.1	-30.2	21	Neu1
9	87192485	87192846	ENSMUSG00000056919	-31.9	-30	20.9	Cep162
2	130614423	130614724	ENSMUSG00000079043	-13	-11.6	20.7	Fastkd5
3	81954388	81954568	ENSMUSG00000028015	-5.56	-4.46	20.7	Ctso
5	96781521	96781732	ENSMUSG00000034687	-8.31	-7.09	20.7	Fras1
5	136141405	136141585	ENSMUSG00000039754	-10.8	-9.51	20.7	Alkbh4
6	126739748	126739988	ENSMUSG00000097596	-18.3	-16.7	20.7	--
6	126739747	126739987	ENSMUSG00000038077	-18.3	-16.7	20.7	Kcna6
7	16564141	16564292	ENSMUSG00000058230	-10.8	-9.51	20.7	Arhgap35
9	50843182	50843512	ENSMUSG00000032059	-18	-16.5	20.7	Alg9
9	53399747	53399838	ENSMUSG00000034487	-5.56	-4.46	20.7	Kdelc2
9	122888475	122888685	ENSMUSG00000063488	-10.8	-9.51	20.7	Zkscan7
11	30892266	30892535	ENSMUSG00000043999	-5.56	-4.46	20.7	Gpr75
11	40750336	40750397	ENSMUSG00000020326	-5.56	-4.46	20.7	Ccng1
17	50608007	50608398	ENSMUSG00000038910	-6.76	-5.6	20.7	Plcl2
18	37401423	37401484	ENSMUSG00000051242	-5.56	-4.46	20.7	Pcdhb9
19	4621183	4621303	ENSMUSG00000024892	-5.56	-4.46	20.7	Pcx
19	59906536	59936031	ENSMUSG00000040022	-25.8	-24	20.7	Rab11fip2
7	64871950	64872489	ENSMUSG00000070520	-73.7	-71.2	20.5	Nsmce3
12	71317450	71317839	ENSMUSG00000044548	-21	-19.4	20.5	Dact1
2	125579466	125579975	ENSMUSG00000068394	-10.6	-9.29	20.3	Cep152
4	119225594	119226045	ENSMUSG00000078584	-10.6	-9.29	20.3	AU022252
8	35588305	35588605	ENSMUSG00000070056	-10.6	-9.29	20.3	Mfhas1
8	83609854	83610617	ENSMUSG00000005483	-43.3	-41.2	20.3	Dnajb1
12	113188543	113188722	ENSMUSG00000049036	-10.6	-9.29	20.3	Tmem121
2	181253598	181254047	ENSMUSG00000038705	-18.2	-16.6	20.2	Gmeb2
1	177447081	177448728	ENSMUSG00000063659	-187	-183	20.1	Zbtb18
15	99470138	99470705	ENSMUSG00000037525	-79.5	-76.9	20.1	Bcdin3d
1	91285661	91285902	ENSMUSG00000034343	-19.8	-18.3	20	Ube2f
1	52458939	52459179	ENSMUSG00000002881	-13.9	-12.5	20	Nab1
1	165215664	165215934	ENSMUSG00000040843	-44.7	-42.6	20	Tiprl
1	191025798	191025978	ENSMUSG00000066595	-5.32	-4.24	20	Flvcr1
2	152109396	152109667	ENSMUSG00000032802	-27.6	-25.8	20	Srxn1
3	122014504	122014654	ENSMUSG00000039831	-5.32	-4.24	20	Arhgap29
3	124321063	124321154	ENSMUSG00000044528	-5.32	-4.24	20	Tram1l1
3	152821320	152821709	ENSMUSG00000039037	-14.6	-13.1	20	St6galnac5
4	32644532	32644803	ENSMUSG00000028282	-30.3	-28.4	20	Casp8ap2
4	144041563	144041770	ENSMUSG00000095987	-15.5	-14	20	--
5	5539070	5539251	ENSMUSG00000040464	-6.76	-5.6	20	Gtpbp10
6	72439320	72440370	ENSMUSG00000108591	-22	-20.3	20	--
7	5030929	5031589	ENSMUSG00000074405	-34.1	-32.2	20	Zfp865
7	41627783	41627993	ENSMUSG00000091474	-14	-12.5	20	2610021A01Rik
7	99858774	99862392	ENSMUSG00000035227	-7.37	-6.18	20	Spcs2
8	42247056	42247320	ENSMUSG00000053038	-33.6	-31.7	20	--
8	61393675	61393975	ENSMUSG00000031642	-9.82	-8.53	20	Sh3rf1
8	24438244	24438422	ENSMUSG00000056313	-5.32	-4.24	20	Tcim
9	55006558	55006708	ENSMUSG00000035594	-5.32	-4.24	20	Chrna5
9	106155396	106155606	ENSMUSG00000086296	-10.4	-9.07	20	--
11	80880734	80881666	ENSMUSG00000020704	-31.7	-29.8	20	Asic2
14	57826758	57826998	ENSMUSG00000021967	-17.1	-15.6	20	Mrpl57
14	56552235	56552505	ENSMUSG00000064128	-8.54	-7.3	20	Cenpj
16	97949834	97950134	ENSMUSG00000046962	-10.9	-9.61	20	Zbtb21
17	21722263	21722473	ENSMUSG00000067928	-8.03	-6.81	20	Zfp760
18	37437127	37437547	ENSMUSG00000103985	-11.5	-10.1	20	--
18	61131874	61132442	ENSMUSG00000024622	-25.7	-23.9	20	Hmgxb3
1	191025799	191025980	ENSMUSG00000097845	-5.32	-4.24	20	--
17	3196915	3197514	ENSMUSG00000046201	-24.5	-22.8	19.8	Scaf8
2	19659271	19659480	ENSMUSG00000043415	-10.8	-9.46	19.6	Otud1
3	108187375	108187795	ENSMUSG00000050947	-14.1	-12.6	19.6	Amigo1
4	15998737	15998978	ENSMUSG00000041153	-11.8	-10.4	19.6	Osgin2
7	109038411	109045389	ENSMUSG00000048330	-24.7	-22.9	19.6	Ric3
9	106155405	106155616	ENSMUSG00000020258	-10.1	-8.85	19.6	Glyctk
11	51069290	51069561	ENSMUSG00000020364	-10.1	-8.85	19.6	Zfp354a
16	36041844	36042321	ENSMUSG00000034379	-10.1	-8.85	19.6	Wdr5b
4	44036983	44037254	ENSMUSG00000028479	-20.6	-19	19.4	Gne
5	33894949	33895220	ENSMUSG00000057406	-23.7	-22	19.4	Nsd2
5	138456797	138457727	ENSMUSG00000036898	-57.7	-55.4	19.4	Zfp157
12	52516313	52516794	ENSMUSG00000035133	-27.5	-25.7	19.4	Arhgap5
1	9747647	9747916	ENSMUSG00000097893	-17	-15.4	19.2	--
1	63593006	63593127	ENSMUSG00000025964	-5.09	-4.02	19.2	Adam23
1	89928492	89928642	ENSMUSG00000034486	-5.09	-4.02	19.2	Gbx2
2	165377826	165378216	ENSMUSG00000017667	-9.36	-8.09	19.2	Zfp334
3	81954777	81954898	ENSMUSG00000028015	-5.61	-4.51	19.2	Ctso
3	108391869	108392320	ENSMUSG00000068740	-82.6	-80	19.2	Celsr2
4	62424184	62424334	ENSMUSG00000066148	-7.53	-6.34	19.2	Prpf4
4	107897166	107897497	ENSMUSG00000028608	-6.65	-5.5	19.2	0610037L13Rik
5	107503349	107503859	ENSMUSG00000111375	-40.1	-38	19.2	Btbd8
5	123290031	123297554	ENSMUSG00000029442	-28.3	-26.5	19.2	Wdr66
9	58823711	58823922	ENSMUSG00000032338	-5.09	-4.02	19.2	Hcn4
9	7933915	7934276	ENSMUSG00000053110	-16.9	-15.4	19.2	Yap1
11	78522348	78522736	ENSMUSG00000001100	-14.1	-12.6	19.2	Poldip2
11	76729750	76729900	ENSMUSG00000010392	-5.09	-4.02	19.2	Gosr1
12	53142518	53142639	ENSMUSG00000061603	-5.09	-4.02	19.2	Akap6
13	83927935	83928115	ENSMUSG00000100891	-6.39	-5.25	19.2	--
14	52019556	52019705	ENSMUSG00000072571	-5.09	-4.02	19.2	Tmem253
18	36947841	36947992	ENSMUSG00000102312	-5.09	-4.02	19.2	Pcdha3
18	37356341	37356551	ENSMUSG00000045876	-9.91	-8.63	19.2	Pcdhb8
3	9438107	9438318	ENSMUSG00000040209	-9.68	-8.4	18.8	Zfp704
4	155734329	155734508	ENSMUSG00000096221	-9.86	-8.58	18.8	--
14	57699354	57699624	ENSMUSG00000114942	-21.7	-20	18.8	Gm49361
19	43901114	43901384	ENSMUSG00000025195	-9.68	-8.4	18.8	Dnmbp
5	30917289	30918158	ENSMUSG00000029163	-24.6	-22.9	18.6	Emilin1
1	183322391	183322809	ENSMUSG00000042901	-16.8	-15.3	18.4	Aida
1	77373116	77373297	ENSMUSG00000026235	-8.31	-7.09	18.4	Epha4
1	156006748	156013372	ENSMUSG00000026466	-37.1	-35.1	18.4	Tor1aip1
1	191372494	191384973	ENSMUSG00000026626	-4.86	-3.8	18.4	Ppp2r5a
2	91712486	91712845	ENSMUSG00000027243	-9.45	-8.18	18.4	Harbi1
2	107296473	107296623	ENSMUSG00000042604	-4.86	-3.8	18.4	Kcna4
2	132805043	132805224	ENSMUSG00000037376	-4.86	-3.8	18.4	Trmt6
3	87993451	87993632	ENSMUSG00000004892	-6.97	-5.8	18.4	Bcan
3	107448062	107448242	ENSMUSG00000027895	-6.34	-5.2	18.4	Kcnc4
4	44761871	44762142	ENSMUSG00000035649	-6.28	-5.15	18.4	Zcchc7
4	115835916	115836155	ENSMUSG00000028709	-4.86	-3.8	18.4	Mob3c
4	62394066	62394336	ENSMUSG00000066149	-19.2	-17.6	18.4	Cdc26
5	33417204	33417355	ENSMUSG00000037355	-5.11	-4.03	18.4	Uvssa
5	52404179	52406003	ENSMUSG00000045790	-5.32	-4.24	18.4	Ccdc149
6	65114324	65114564	ENSMUSG00000029920	-8.35	-7.12	18.4	Smarcad1
6	39142937	39143147	ENSMUSG00000042599	-13.7	-12.3	18.4	Kdm7a
7	4828840	4829050	ENSMUSG00000053550	-6.73	-5.57	18.4	Shisa7
8	35589381	35589472	ENSMUSG00000070056	-4.86	-3.8	18.4	Mfhas1
8	79190176	79190625	ENSMUSG00000071064	-17.3	-15.8	18.4	Zfp827
8	79281271	79281482	ENSMUSG00000037022	-9.97	-8.68	18.4	Mmaa
8	119597930	119598139	ENSMUSG00000031832	-8.54	-7.3	18.4	Taf1c
8	125492456	125492637	ENSMUSG00000001995	-4.86	-3.8	18.4	Sipa1l2
9	15740001	15740121	ENSMUSG00000043885	-5.39	-4.31	18.4	Slc36a4
9	44506590	44507399	ENSMUSG00000063382	-18.9	-17.3	18.4	Bcl9l
9	56925323	56925474	ENSMUSG00000032733	-4.86	-3.8	18.4	Snx33
11	80198716	80198895	ENSMUSG00000020707	-4.86	-3.8	18.4	Rnf135
11	115488977	115489812	ENSMUSG00000057219	-9.45	-8.18	18.4	Armc7
11	115811992	115812202	ENSMUSG00000034471	-9.45	-8.18	18.4	Caskin2
12	65131037	65131158	ENSMUSG00000055884	-4.86	-3.8	18.4	Fancm
13	97179608	97179788	ENSMUSG00000021666	-9.45	-8.18	18.4	Gfm2
15	76175621	76175742	ENSMUSG00000022565	-4.86	-3.8	18.4	Plec
15	88696252	88696432	ENSMUSG00000022387	-6.28	-5.15	18.4	Brd1
18	37356345	37356547	ENSMUSG00000045876	-9.45	-8.18	18.4	Pcdhb8
18	37479813	37479993	ENSMUSG00000047910	-4.86	-3.8	18.4	Pcdhb16
19	38789412	38789683	ENSMUSG00000024999	-6.53	-5.39	18.4	Noc3l
6	119480445	119481224	ENSMUSG00000030019	-94.2	-91.5	18.3	Fbxl14
7	44353954	44354254	ENSMUSG00000038738	-40.8	-38.7	18.3	Shank1
6	48613227	48619522	ENSMUSG00000007216	-26.4	-24.7	18.2	Zfp775
17	87133818	87134297	ENSMUSG00000037104	-61.8	-59.4	18.2	Socs5
18	37716502	37716922	ENSMUSG00000103472	-18.7	-17.1	18.2	Pcdhga7
1	156051446	156051806	ENSMUSG00000050565	-31.9	-30	18	Tor1aip2
2	151593806	151594195	ENSMUSG00000027457	-9.23	-7.96	18	Snph
2	166074016	166074736	ENSMUSG00000006800	-30.6	-28.7	18	Sulf2
5	3692666	3693326	ENSMUSG00000040351	-18.8	-17.2	18	Ankib1
7	97685492	97686152	ENSMUSG00000035623	-62	-59.7	18	Rsf1
7	99925316	99925886	ENSMUSG00000058761	-17.3	-15.8	18	Rnf169
8	31236155	31236486	ENSMUSG00000046152	-26.8	-25.1	18	Fut10
9	108464319	108464560	ENSMUSG00000049305	-20	-18.4	18	Ccdc71
6	47904982	47905791	ENSMUSG00000025821	-81.9	-79.3	17.9	Zfp282
9	15005786	15006027	ENSMUSG00000031934	-30.3	-28.4	17.9	Panx1
2	180775759	180776090	ENSMUSG00000045493	-41.3	-39.2	17.8	Bhlhe23
15	27606102	27606400	ENSMUSG00000046034	-27.5	-25.7	17.8	Otulin
1	106392487	106393533	ENSMUSG00000044340	-42.3	-40.2	17.7	Phlpp1
1	155953219	155953340	ENSMUSG00000033671	-4.63	-3.59	17.7	Cep350
2	32033410	32033471	ENSMUSG00000001855	-4.63	-3.59	17.7	Nup214
2	181718989	181719407	ENSMUSG00000027584	-6.28	-5.15	17.7	Oprl1
2	30828181	30828361	ENSMUSG00000039483	-4.63	-3.59	17.7	Asb6
2	121232245	121235829	ENSMUSG00000043909	-19.4	-17.8	17.7	Trp53bp1
2	130874314	130874524	ENSMUSG00000085566	-4.96	-3.89	17.7	--
2	160779686	160779896	ENSMUSG00000035877	-9	-7.74	17.7	Zhx3
2	165490765	165490945	ENSMUSG00000039725	-9	-7.74	17.7	Trp53rka
3	88896056	88896387	ENSMUSG00000054199	-25.1	-23.4	17.7	Gon4l
4	15265950	15266100	ENSMUSG00000043252	-4.63	-3.59	17.7	Tmem64
4	70243454	70243635	ENSMUSG00000039298	-9.07	-7.81	17.7	Cdk5rap2
4	152124721	152124812	ENSMUSG00000028943	-4.63	-3.59	17.7	Espn
5	121852875	121853858	ENSMUSG00000044134	-27.8	-26	17.7	Pheta1
5	130241438	130241678	ENSMUSG00000053094	-15.2	-13.7	17.7	Tmem248
5	148991336	148991546	ENSMUSG00000106951	-9	-7.74	17.7	--
6	72348961	72349201	ENSMUSG00000058706	-17.6	-16.1	17.7	0610030E20Rik
6	13838753	13838962	ENSMUSG00000048216	-9	-7.74	17.7	Gpr85
7	82870316	82870766	ENSMUSG00000057706	-31.6	-29.7	17.7	Mex3b
7	35584473	35584833	ENSMUSG00000056043	-24.2	-22.4	17.7	Rgs9bp
7	127374170	127374469	ENSMUSG00000054381	-12.3	-10.9	17.7	Zfp747
7	138835852	138836301	ENSMUSG00000041775	-31.4	-29.5	17.7	Mapk1ip1
8	92360222	92360967	ENSMUSG00000031737	-38.4	-36.4	17.7	Irx5
9	51850107	51850558	ENSMUSG00000053199	-7.46	-6.28	17.7	Arhgap20
9	62059792	62059973	ENSMUSG00000032252	-5.56	-4.46	17.7	Glce
9	65555995	65556415	ENSMUSG00000050721	-14.7	-13.2	17.7	Plekho2
10	67096453	67096664	ENSMUSG00000037876	-7.3	-6.12	17.7	Jmjd1c
10	80902610	80902761	ENSMUSG00000062075	-8.4	-7.17	17.7	Lmnb2
11	103650074	103650371	ENSMUSG00000046215	-9	-7.74	17.7	Rprml
11	103220000	103220211	ENSMUSG00000020941	-4.63	-3.59	17.7	Map3k14
12	83725682	83728778	ENSMUSG00000019969	-5.75	-4.64	17.7	Psen1
12	108328442	108328533	ENSMUSG00000021260	-4.74	-3.69	17.7	Hhipl1
13	29909393	29909544	ENSMUSG00000016477	-4.63	-3.59	17.7	E2f3
15	89069818	89070029	ENSMUSG00000058441	-4.63	-3.59	17.7	Panx2
15	58054918	58055068	ENSMUSG00000022361	-4.63	-3.59	17.7	Zhx1
16	62795210	62795630	ENSMUSG00000022911	-23.6	-21.9	17.7	Arl13b
17	33018177	33018775	ENSMUSG00000067430	-20.3	-18.6	17.7	Zfp763
19	5040505	5040775	ENSMUSG00000047379	-41.5	-39.4	17.7	B4gat1
X	53669323	53669734	ENSMUSG00000067924	-68	-65.5	17.7	Rtl8b
4	141468369	141468999	ENSMUSG00000040761	-42.7	-40.6	17.5	Spen
6	48620567	48620807	ENSMUSG00000007216	-17.4	-15.8	17.5	Zfp775
3	94363577	94363937	ENSMUSG00000091648	-10.6	-9.31	17.3	C2cd4d
8	121836869	121837109	ENSMUSG00000110631	-23.7	-22	17.3	--
10	127056022	127057466	ENSMUSG00000040502	-70.6	-68.1	17.3	2022-03-09
18	61131848	61132149	ENSMUSG00000024621	-25.5	-23.7	17.3	Csf1r
18	46505761	46505912	ENSMUSG00000033319	-8.77	-7.52	17.3	Fem1c
18	78755475	78755806	ENSMUSG00000024548	-13.5	-12.1	17.3	Setbp1
4	155734308	155734518	ENSMUSG00000096221	-10.2	-8.89	17.3	--
11	3717982	3724430	ENSMUSG00000020435	-12.9	-11.5	17.1	Osbp2
16	34723133	34723524	ENSMUSG00000022833	-16.9	-15.4	17.1	Ccdc14
17	69388259	69388710	ENSMUSG00000049672	-58.2	-55.8	17.1	Zbtb14
11	26386939	26387269	ENSMUSG00000004018	-41.4	-39.3	17	Fancl
16	75757660	75758380	ENSMUSG00000032932	-21	-19.3	17	Hspa13
1	34812559	34812710	ENSMUSG00000037509	-8.54	-7.3	16.9	Arhgef4
1	125872203	125872683	ENSMUSG00000026344	-11.1	-9.8	16.9	Lypd1
2	3453582	3453792	ENSMUSG00000026648	-5.56	-4.46	16.9	Dclre1c
2	14987667	14987788	ENSMUSG00000057914	-4.4	-3.37	16.9	Cacnb2
2	29179535	29180195	ENSMUSG00000043535	-64.5	-62.1	16.9	Setx
2	97629755	97630293	ENSMUSG00000050587	-8.46	-7.22	16.9	Lrrc4c
2	154531582	154535346	ENSMUSG00000038533	-10.5	-9.16	16.9	Cbfa2t2
2	158495450	158496020	ENSMUSG00000027652	-36.3	-34.3	16.9	Ralgapb
3	5402243	5402514	ENSMUSG00000025255	-8.54	-7.3	16.9	Zfhx4
3	88923610	88923760	ENSMUSG00000068921	-5.13	-4.06	16.9	Dap3
4	44036503	44036654	ENSMUSG00000028479	-4.4	-3.37	16.9	Gne
4	110206055	110206235	ENSMUSG00000028546	-4.4	-3.37	16.9	Elavl4
4	154023155	154023305	ENSMUSG00000078350	-4.4	-3.37	16.9	Smim1
5	118762891	118763162	ENSMUSG00000018076	-21.1	-19.5	16.9	Med13l
5	123029531	123029801	ENSMUSG00000049686	-9.97	-8.68	16.9	Orai1
5	107478554	107478701	ENSMUSG00000089628	-4.4	-3.37	16.9	--
6	35261400	35261701	ENSMUSG00000073155	-49.1	-46.9	16.9	--
6	85622729	85622910	ENSMUSG00000063810	-4.4	-3.37	16.9	Alms1
6	100865858	100866038	ENSMUSG00000052144	-6.1	-4.98	16.9	Ppp4r2
6	107569378	107569647	ENSMUSG00000034648	-15.9	-14.4	16.9	Lrrn1
6	119575128	119575577	ENSMUSG00000108282	-11	-9.62	16.9	--
7	55842077	55842258	ENSMUSG00000030447	-4.52	-3.48	16.9	Cyfip1
7	24229246	24229426	ENSMUSG00000074283	-4.4	-3.37	16.9	Zfp109
7	35050277	35050667	ENSMUSG00000056216	-25.6	-23.9	16.9	Cebpg
8	11454316	11454376	ENSMUSG00000031504	-4.4	-3.37	16.9	Rab20
8	116889483	116889721	ENSMUSG00000014633	-6.05	-4.92	16.9	Cmc2
9	22055440	22055650	ENSMUSG00000038895	-9.37	-8.1	16.9	Zfp653
9	50771923	50774002	ENSMUSG00000037971	-4.4	-3.37	16.9	1110032A03Rik
10	41464435	41465065	ENSMUSG00000019826	-19.4	-17.8	16.9	Zbtb24
10	111299306	111299486	ENSMUSG00000035759	-4.4	-3.37	16.9	Bbs10
10	127172138	127172317	ENSMUSG00000040441	-13.8	-12.4	16.9	Slc26a10
11	62458459	62458669	ENSMUSG00000014245	-6.93	-5.76	16.9	Pigl
11	62552315	62552525	ENSMUSG00000019505	-4.4	-3.37	16.9	Ubb
11	74929890	74930460	ENSMUSG00000038290	-24.8	-23.1	16.9	Smg6
11	102189619	102189814	ENSMUSG00000034793	-6.99	-5.82	16.9	G6pc3
11	50257635	50258024	ENSMUSG00000050567	-20.3	-18.6	16.9	Maml1
12	66470313	66470404	ENSMUSG00000034912	-4.4	-3.37	16.9	Mdga2
13	54052681	54052892	ENSMUSG00000021478	-4.4	-3.37	16.9	Drd1
13	119487437	119487586	ENSMUSG00000074635	-4.4	-3.37	16.9	3110070M22Rik
14	61209940	61210121	ENSMUSG00000048279	-4.4	-3.37	16.9	Sacs
15	81936847	81937057	ENSMUSG00000042109	-16.5	-15	16.9	Csdc2
15	50660721	50660872	ENSMUSG00000038679	-4.96	-3.89	16.9	Trps1
15	96687900	96688470	ENSMUSG00000022462	-32.5	-30.6	16.9	Slc38a2
16	21677251	21677522	ENSMUSG00000043391	-19.6	-18	16.9	2510009E07Rik
17	28599778	28599959	ENSMUSG00000004865	-7.33	-6.15	16.9	Srpk1
17	33242530	33242680	ENSMUSG00000094441	-4.7	-3.65	16.9	Zfp955a
17	65848956	65849196	ENSMUSG00000024096	-22.8	-21.2	16.9	Ralbp1
18	37748848	37749089	ENSMUSG00000102222	-5.14	-4.06	16.9	Pcdhga10
18	37806363	37807231	ENSMUSG00000102918	-14.1	-12.6	16.9	Pcdhgc3
18	77254970	77255181	ENSMUSG00000025425	-8.54	-7.3	16.9	St8sia5
19	5716153	5716303	ENSMUSG00000024937	-8.54	-7.3	16.9	Ehbp1l1
19	5891763	5891972	ENSMUSG00000044390	-6.32	-5.19	16.9	Tigd3
X	112632556	112633006	ENSMUSG00000025529	-7.41	-6.22	16.9	Zfp711
X	94541904	94542113	ENSMUSG00000025151	-7.8	-6.6	16.9	Maged1
3	103736215	103736455	ENSMUSG00000027848	-8.54	-7.3	16.9	Olfml3
2	180659192	180661051	ENSMUSG00000038914	-144	-141	16.7	Dido1
5	105813674	105814483	ENSMUSG00000046079	-33.5	-31.5	16.7	Lrrc8d
11	78750535	78751013	ENSMUSG00000049489	-67.9	-65.4	16.7	Fam58b
19	32514268	32514983	ENSMUSG00000024896	-44.2	-42.1	16.7	Minpp1
1	4776354	4776624	ENSMUSG00000033845	-11.1	-9.73	16.5	Mrpl15
1	133383529	133383800	ENSMUSG00000070643	-8.74	-7.49	16.5	Sox13
3	106732159	106732399	ENSMUSG00000056260	-8.31	-7.09	16.5	Lrif1
3	73048551	73049120	ENSMUSG00000048304	-17.6	-16	16.5	Slitrk3
5	106983057	106983327	ENSMUSG00000029283	-16.2	-14.7	16.5	Cdc7
5	150496522	150496733	ENSMUSG00000056602	-8.46	-7.22	16.5	Fry
9	13244068	13244606	ENSMUSG00000079083	-27.9	-26.1	16.5	Jrkl
10	94578466	94578796	ENSMUSG00000020023	-10.6	-9.32	16.5	Tmcc3
12	33439683	33440194	ENSMUSG00000020561	-23.4	-21.7	16.5	Twistnb
15	31620356	31620627	ENSMUSG00000039065	-11.3	-9.92	16.5	Fam173b
16	90751856	90752067	ENSMUSG00000039929	-8.31	-7.09	16.5	Urb1
18	46505072	46505553	ENSMUSG00000033319	-29.9	-28	16.5	Fem1c
X	134749688	134750108	ENSMUSG00000050394	-54.6	-52.3	16.5	Armcx6
2	130614406	130614705	ENSMUSG00000079043	-13	-11.6	16.5	Fastkd5
4	102603416	102605759	ENSMUSG00000028525	-57.5	-55.1	16.4	Pde4b
4	126716243	126716512	ENSMUSG00000042477	-21.8	-20.1	16.4	Tfap2e
13	3884055	3884266	ENSMUSG00000021215	-23.9	-22.2	16.4	Net1
5	148077499	148077679	ENSMUSG00000029651	-16	-14.5	16.3	Mtus2
5	45734121	45735757	ENSMUSG00000015882	-16	-14.5	16.3	Lcorl
15	80212199	80212589	ENSMUSG00000042428	-39.1	-37.1	16.3	Mgat3
15	63930294	63930505	ENSMUSG00000022378	-19.8	-18.2	16.3	Fam49b
X	102067920	102068640	ENSMUSG00000049191	-17.5	-16	16.3	Rtl5
4	121146210	121147080	ENSMUSG00000049878	-33.2	-31.3	16.2	Rlf
7	16140770	16141070	ENSMUSG00000030376	-23.6	-21.9	16.2	Slc8a2
9	108826828	108827427	ENSMUSG00000023473	-71.8	-69.2	16.2	Celsr3
10	13127380	13127680	ENSMUSG00000019817	-33.1	-31.2	16.2	Plagl1
X	103460495	103466577	ENSMUSG00000086503	-117	-114	16.2	--
1	23369714	23370403	ENSMUSG00000026158	-63.1	-60.7	16.1	Ogfrl1
1	59162925	59163435	ENSMUSG00000026024	-50.3	-48.1	16.1	Als2
1	88204848	88204995	ENSMUSG00000081984	-4.18	-3.16	16.1	Dnajb3
1	93321153	93321304	ENSMUSG00000026274	-4.18	-3.16	16.1	Pask
1	144001465	144001983	ENSMUSG00000026360	-10.1	-8.79	16.1	Rgs2
2	34172414	34172475	ENSMUSG00000038718	-4.18	-3.16	16.1	Pbx3
3	96690257	96690466	ENSMUSG00000038354	-7.27	-6.09	16.1	Ankrd35
3	49756425	49756606	ENSMUSG00000037892	-7.86	-6.65	16.1	Pcdh18
3	73050286	73050407	ENSMUSG00000048304	-4.18	-3.16	16.1	Slitrk3
3	89768710	89768801	ENSMUSG00000042579	-4.18	-3.16	16.1	--
5	137745879	137746209	ENSMUSG00000029723	-27.8	-26	16.1	Tsc22d4
5	124120964	124121504	ENSMUSG00000029406	-15.8	-14.3	16.1	Pitpnm2
6	119575140	119575470	ENSMUSG00000030172	-11.3	-9.99	16.1	Erc1
7	46396676	46396766	ENSMUSG00000058975	-4.18	-3.16	16.1	Kcnc1
7	130764484	130764785	ENSMUSG00000030852	-39.1	-37	16.1	Tacc2
7	13261185	13261396	ENSMUSG00000070814	-4.96	-3.89	16.1	Zswim9
7	99900310	99900699	ENSMUSG00000108985	-9.38	-8.11	16.1	--
7	127511356	127511535	ENSMUSG00000101225	-5.61	-4.51	16.1	--
7	143069391	143071196	ENSMUSG00000009246	-4.18	-3.16	16.1	Trpm5
8	79092020	79118308	ENSMUSG00000071064	-8.08	-6.87	16.1	Zfp827
8	110223233	110223294	ENSMUSG00000046441	-4.18	-3.16	16.1	Cmtr2
9	32256839	32257500	ENSMUSG00000041444	-22.6	-21	16.1	Arhgap32
9	56937474	56937713	ENSMUSG00000032288	-9.95	-8.65	16.1	Imp3
9	114405547	114405637	ENSMUSG00000079260	-4.18	-3.16	16.1	Tmppe
9	55065485	55065721	ENSMUSG00000111157	-4.42	-3.39	16.1	--
9	59737387	59737478	ENSMUSG00000051705	-4.3	-3.28	16.1	Senp8
9	64311606	64311967	ENSMUSG00000032396	-63.8	-61.3	16.1	Dis3l
10	63930027	63930208	ENSMUSG00000042846	-4.18	-3.16	16.1	Lrrtm3
10	80834205	80835522	ENSMUSG00000051067	-95.5	-92.7	16.1	Lingo3
11	70557630	70557841	ENSMUSG00000020828	-8.8	-7.55	16.1	Pld2
11	20303917	20304337	ENSMUSG00000020142	-5.34	-4.26	16.1	Slc1a4
11	50266400	50266759	ENSMUSG00000050567	-30.3	-28.4	16.1	Maml1
12	33439563	33439624	ENSMUSG00000020561	-4.18	-3.16	16.1	Twistnb
12	84154966	84155147	ENSMUSG00000042507	-6.37	-5.23	16.1	Elmsan1
12	108826950	108827071	ENSMUSG00000021265	-4.18	-3.16	16.1	Slc25a29
13	63898622	63898803	ENSMUSG00000021470	-4.18	-3.16	16.1	Ercc6l2
13	21444750	21445080	ENSMUSG00000022228	-13.9	-12.5	16.1	Zscan26
13	28396369	28396609	ENSMUSG00000113216	-4.18	-3.16	16.1	--
14	38370565	38370835	ENSMUSG00000041014	-15.8	-14.3	16.1	Nrg3
14	45595084	45595534	ENSMUSG00000037697	-7.46	-6.28	16.1	Ddhd1
16	17572913	17573213	ENSMUSG00000022756	-21.8	-20.1	16.1	Slc7a4
16	38525345	38525555	ENSMUSG00000034064	-7.76	-6.56	16.1	Poglut1
16	48925759	48925880	ENSMUSG00000064061	-5.11	-4.03	16.1	Dzip3
17	12324764	12324915	ENSMUSG00000097350	-4.18	-3.16	16.1	--
17	28176932	28177173	ENSMUSG00000117171	-4.99	-3.92	16.1	--
18	37514489	37514580	ENSMUSG00000044022	-4.18	-3.16	16.1	Pcdhb21
18	84739568	84739629	ENSMUSG00000047992	-4.18	-3.16	16.1	Fam69c
18	78783417	78856802	ENSMUSG00000024548	-13	-11.6	16.1	Setbp1
19	8772085	8772385	ENSMUSG00000010097	-19.9	-18.3	16.1	Nxf1
11	106154104	106154612	ENSMUSG00000020700	-51.7	-49.5	15.8	Map3k3
15	76694411	76694919	ENSMUSG00000033819	-23.9	-22.2	15.8	Ppp1r16a
15	81013209	81013659	ENSMUSG00000042292	-20.5	-18.9	15.8	Mkl1
16	36911953	36913152	ENSMUSG00000034243	-37.7	-35.7	15.8	Golgb1
1	92919643	92920480	ENSMUSG00000026269	-65.3	-62.9	15.8	Rnpepl1
1	92919645	92920483	ENSMUSG00000026269	-65.8	-63.4	15.7	Rnpepl1
1	171143630	171150573	ENSMUSG00000058076	-7.86	-6.65	15.7	Sdhc
4	107126612	107126732	ENSMUSG00000085304	-12.8	-11.4	15.7	--
5	138144452	138144931	ENSMUSG00000037007	-7.86	-6.65	15.7	Zfp113
6	70892500	70892771	ENSMUSG00000031668	-30.1	-28.3	15.7	Eif2ak3
6	142361834	142362194	ENSMUSG00000030243	-18.1	-16.6	15.7	Recql
9	64928017	64928227	ENSMUSG00000034452	-10.4	-9.11	15.7	Slc24a1
10	82060523	82060734	ENSMUSG00000061371	-15.3	-13.9	15.7	Zfp873
12	113188038	113188247	ENSMUSG00000049036	-8.46	-7.22	15.7	Tmem121
13	67825476	67825686	ENSMUSG00000030446	-7.86	-6.65	15.7	Zfp273
14	33970951	33971101	ENSMUSG00000044519	-7.86	-6.65	15.7	Zfp488
15	76541141	76541500	ENSMUSG00000022560	-19.1	-17.5	15.7	Slc52a2
16	13147924	13148224	ENSMUSG00000022545	-24.3	-22.6	15.7	Ercc4
17	24892294	24892475	ENSMUSG00000073436	-15.3	-13.9	15.7	Eme2
17	24892272	24892482	ENSMUSG00000024163	-15.3	-13.9	15.7	Mapk8ip3
X	66655408	66655738	ENSMUSG00000036790	-15.3	-13.9	15.7	Slitrk2
2	168098668	168099444	ENSMUSG00000044641	-60.6	-58.3	15.5	Pard6b
4	5798637	5798907	ENSMUSG00000049119	-54.9	-52.6	15.5	Fam110b
17	25730977	25731217	ENSMUSG00000041199	-18.7	-17.1	15.5	Rpusd1
17	32977332	32977571	ENSMUSG00000053600	-15.1	-13.6	15.5	Zfp472
1	66412538	66412929	ENSMUSG00000015222	-29.9	-28	15.4	Map2
1	104984907	104994583	ENSMUSG00000050840	-40.3	-38.3	15.4	Cdh20
1	131179518	131179849	ENSMUSG00000026427	-8.89	-7.64	15.4	Eif2d
1	9747571	9747902	ENSMUSG00000045210	-33.8	-31.9	15.4	Vcpip1
1	155933141	155933382	ENSMUSG00000033671	-3.95	-2.94	15.4	Cep350
1	160224089	160226063	ENSMUSG00000026721	-8.55	-7.31	15.4	Rabgap1l
2	32681859	32681950	ENSMUSG00000026814	-3.95	-2.94	15.4	Eng
2	131273940	131280193	ENSMUSG00000037514	-20.6	-19	15.4	Pank2
2	25578911	25578972	ENSMUSG00000029419	-3.95	-2.94	15.4	Ajm1
2	143947394	143947575	ENSMUSG00000027422	-5.75	-4.64	15.4	Rrbp1
3	5413398	5413789	ENSMUSG00000025255	-7.43	-6.24	15.4	Zfhx4
3	39010486	39011056	ENSMUSG00000046743	-44.8	-42.7	15.4	Fat4
3	98146347	98146468	ENSMUSG00000027878	-3.95	-2.94	15.4	Notch2
3	79480865	79481076	ENSMUSG00000061175	-7.63	-6.43	15.4	Fnip2
4	106484862	106485013	ENSMUSG00000025418	-3.95	-2.94	15.4	Bsnd
4	120930345	120930496	ENSMUSG00000064141	-3.95	-2.94	15.4	Zfp69
5	14858991	14859082	ENSMUSG00000061601	-3.95	-2.94	15.4	Pclo
5	108347979	108348219	ENSMUSG00000029263	-9.91	-8.62	15.4	Pigg
5	110222965	110223085	ENSMUSG00000029502	-3.95	-2.94	15.4	Golga3
5	121860942	121861362	ENSMUSG00000042589	-17.1	-15.6	15.4	Cux2
6	53817744	53817894	ENSMUSG00000043496	-3.95	-2.94	15.4	Tril
6	134718316	134718707	ENSMUSG00000030203	-22.6	-20.9	15.4	Dusp16
7	16781756	16781876	ENSMUSG00000001918	-3.95	-2.94	15.4	Slc1a5
7	24140573	24140753	ENSMUSG00000047603	-3.95	-2.94	15.4	Zfp235
7	100159721	100160326	ENSMUSG00000030725	-3.95	-2.94	15.4	Lipt2
7	29965448	29965565	ENSMUSG00000083669	-4.42	-3.39	15.4	--
7	51861495	51861793	ENSMUSG00000092118	-10.3	-9.03	15.4	Fancf
7	105787383	105787504	ENSMUSG00000036862	-3.95	-2.94	15.4	Dchs1
7	116418305	116418456	ENSMUSG00000030660	-3.95	-2.94	15.4	Pik3c2a
7	127405338	127405429	ENSMUSG00000045757	-3.95	-2.94	15.4	Zfp764
8	22243423	22243484	ENSMUSG00000031480	-3.95	-2.94	15.4	Thsd1
8	71889597	71889747	ENSMUSG00000056019	-3.95	-2.94	15.4	Zfp709
9	15311723	15311784	ENSMUSG00000031939	-3.95	-2.94	15.4	Taf1d
9	40212709	40212888	ENSMUSG00000025602	-3.95	-2.94	15.4	Zfp202
9	107580510	107580661	ENSMUSG00000010051	-5.59	-4.49	15.4	Hyal1
9	121759158	121759399	ENSMUSG00000097820	-5.13	-4.06	15.4	--
10	7663306	7663426	ENSMUSG00000019795	-3.95	-2.94	15.4	Pcmt1
10	41719645	41719735	ENSMUSG00000019813	-3.95	-2.94	15.4	Cep57l1
10	122079516	122079577	ENSMUSG00000034620	-3.95	-2.94	15.4	Tmem5
11	73177231	73180428	ENSMUSG00000040158	-3.95	-2.94	15.4	Tax1bp3
11	76213347	76213528	ENSMUSG00000049396	-5.84	-4.72	15.4	Gemin4
12	4247481	4248291	ENSMUSG00000020647	-37.5	-35.5	15.4	Ncoa1
12	73284720	73284988	ENSMUSG00000034442	-14.9	-13.4	15.4	Trmt5
13	31630714	31630955	ENSMUSG00000038402	-3.95	-2.94	15.4	Foxf2
13	35816372	35816463	ENSMUSG00000059288	-3.95	-2.94	15.4	Cdyl
13	47047906	47047966	ENSMUSG00000038080	-3.95	-2.94	15.4	Kdm1b
13	81579458	81579699	ENSMUSG00000069170	-7.14	-5.96	15.4	Adgrv1
14	8164667	8164907	ENSMUSG00000033885	-8.89	-7.64	15.4	Pxk
14	33483573	33483663	ENSMUSG00000108841	-3.95	-2.94	15.4	Frmpd2
14	79427918	79428818	ENSMUSG00000043881	-22.1	-20.4	15.4	Kbtbd7
14	70306525	70306646	ENSMUSG00000022094	-3.95	-2.94	15.4	Slc39a14
15	10994858	10994949	ENSMUSG00000022244	-4.09	-3.08	15.4	Amacr
15	4023046	4023137	ENSMUSG00000087221	-3.95	-2.94	15.4	--
16	90904359	90904480	ENSMUSG00000039903	-3.95	-2.94	15.4	Eva1c
16	18247317	18256682	ENSMUSG00000116925	-27.9	-26.1	15.4	AC084822.2
16	76291028	76291958	ENSMUSG00000048490	-36.2	-34.2	15.4	Nrip1
17	33105400	33105817	ENSMUSG00000067424	-36.1	-34.2	15.4	Zfp563
17	34977885	34978064	ENSMUSG00000007033	-3.95	-2.94	15.4	Hspa1l
17	80227782	80228081	ENSMUSG00000055760	-19.6	-18	15.4	Gemin6
17	42796219	42798624	ENSMUSG00000061665	-7.63	-6.43	15.4	Cd2ap
18	37402561	37402681	ENSMUSG00000051242	-3.95	-2.94	15.4	Pcdhb9
19	8888852	8889030	ENSMUSG00000071653	-7.53	-6.34	15.4	1810009A15Rik
19	56546953	56547044	ENSMUSG00000025077	-3.95	-2.94	15.4	Dclre1a
X	94098620	94098769	ENSMUSG00000087640	-3.95	-2.94	15.4	--
X	36623917	36624097	ENSMUSG00000059708	-3.95	-2.94	15.4	Akap17b
X	94098616	94098796	ENSMUSG00000079509	-3.95	-2.94	15.4	Zfx
Y	941366	941427	ENSMUSG00000056673	-3.95	-2.94	15.4	Kdm5d
5	147018333	147018483	ENSMUSG00000016520	-3.95	-2.94	15.4	Lnx2
15	68335072	68335192	ENSMUSG00000096967	-3.95	-2.94	15.4	--
8	107052312	107052761	ENSMUSG00000031916	-36.1	-34.2	15.3	Cog8
13	116894773	116895192	ENSMUSG00000021725	-59	-56.6	15.3	Parp8
7	75866862	75867132	ENSMUSG00000055652	-23	-21.3	15.2	Klhl25
1	179625023	179625473	ENSMUSG00000038949	-53.3	-51	15.1	Cnst
4	70432657	70433466	ENSMUSG00000039270	-30.8	-28.9	15.1	Megf9
2	65763821	65764062	ENSMUSG00000075318	-7.94	-6.73	15	Scn2a
4	107414077	107414287	ENSMUSG00000028614	-20.7	-19.1	15	Ndc1
4	155991399	155991846	ENSMUSG00000050796	-10.1	-8.81	15	B3galt6
6	54888463	54888734	ENSMUSG00000058446	-20.4	-18.8	15	Znrf2
6	53818433	53818853	ENSMUSG00000043496	-8.14	-6.93	15	Tril
7	92657362	92657843	ENSMUSG00000041328	-14.9	-13.5	15	Pcf11
8	25802279	25802488	ENSMUSG00000037296	-12.5	-11.1	15	Lsm1
11	59809570	59809927	ENSMUSG00000032633	-29.5	-27.7	15	Flcn
12	111678727	111678906	ENSMUSG00000060950	-7.4	-6.22	15	Trmt61a
12	111709935	111711398	ENSMUSG00000049792	-53.9	-51.6	15	Bag5
14	21984586	21985274	ENSMUSG00000039081	-44.4	-42.2	15	Zfp503
17	56258516	56258877	ENSMUSG00000043683	-47.1	-44.9	15	Fem1a
19	43736455	43736815	ENSMUSG00000040018	-42.5	-40.4	15	Cox15
19	45552423	45552603	ENSMUSG00000025218	-7.4	-6.22	15	Poll
9	106693441	106693591	ENSMUSG00000040661	-7.4	-6.22	15	Rad54l2
1	36549294	36550279	ENSMUSG00000026121	-48.6	-46.4	14.9	Sema4c
4	62423289	62424036	ENSMUSG00000066148	-28.1	-26.3	14.9	Prpf4
5	135380982	135381223	ENSMUSG00000053293	-14.7	-13.2	14.8	Pom121
6	8592986	8593496	ENSMUSG00000107705	-79.8	-77.2	14.8	Gm45062
8	107046796	107047276	ENSMUSG00000031916	-45.8	-43.7	14.8	Cog8
9	82871075	82871856	ENSMUSG00000032253	-105	-102	14.7	Phip
9	94520107	94524421	ENSMUSG00000045414	-35.9	-33.9	14.7	1190002N15Rik
17	71750744	71751909	ENSMUSG00000044375	-89.4	-86.6	14.7	Pcare
1	88700401	88701237	ENSMUSG00000049866	-125	-122	14.7	Arl4c
1	42696487	42696638	ENSMUSG00000045515	-4.08	-3.07	14.6	Pou3f3
1	86582539	86582599	ENSMUSG00000026239	-3.72	-2.73	14.6	Pde6d
1	97660809	97661080	ENSMUSG00000044768	-6.97	-5.8	14.6	D1Ertd622e
1	191045915	191046096	ENSMUSG00000026632	-3.72	-2.73	14.6	Tatdn3
1	191997622	191997772	ENSMUSG00000026637	-3.72	-2.73	14.6	Traf5
2	69667212	69667362	ENSMUSG00000063145	-7.6	-6.41	14.6	Bbs5
2	3506984	3507254	ENSMUSG00000051396	-7.13	-5.96	14.6	Gm45902
2	26888807	26888957	ENSMUSG00000036160	-3.72	-2.73	14.6	Surf6
2	52402013	52402403	ENSMUSG00000036093	-8.76	-7.51	14.6	Arl5a
2	120745751	120746111	ENSMUSG00000090100	-16.9	-15.4	14.6	Ttbk2
2	167301165	167301465	ENSMUSG00000017929	-13.3	-11.9	14.6	B4galt5
3	36168035	36168215	ENSMUSG00000033883	-3.72	-2.73	14.6	D3Ertd254e
3	73049269	73049389	ENSMUSG00000048304	-3.72	-2.73	14.6	Slitrk3
3	155087728	155087909	ENSMUSG00000053870	-3.72	-2.73	14.6	Fpgt
4	5799325	5799625	ENSMUSG00000049119	-23.9	-22.2	14.6	Fam110b
4	53714477	53720116	ENSMUSG00000028414	-3.72	-2.73	14.6	Fktn
4	56811951	56812042	ENSMUSG00000038816	-4.3	-3.28	14.6	Ctnnal1
4	86583423	86583574	ENSMUSG00000038047	-3.88	-2.88	14.6	Haus6
5	35281283	35281434	ENSMUSG00000045318	-3.72	-2.73	14.6	Adra2c
5	130875496	130875737	ENSMUSG00000034040	-4.25	-3.22	14.6	Galnt17
6	85627941	85628092	ENSMUSG00000063810	-4.5	-3.47	14.6	Alms1
6	86445975	86446155	ENSMUSG00000046679	-3.72	-2.73	14.6	C87436
7	19857975	19858654	ENSMUSG00000014686	-3.72	-2.73	14.6	Ceacam16
7	63890384	63891072	ENSMUSG00000052040	-24.1	-22.4	14.6	Klf13
7	131343498	131343769	ENSMUSG00000040177	-8.24	-7.02	14.6	2310057M21Rik
8	71642143	71642324	ENSMUSG00000034799	-7.18	-6	14.6	Unc13a
9	13706298	13706449	ENSMUSG00000031925	-3.72	-2.73	14.6	Maml2
9	50771914	50772064	ENSMUSG00000037845	-3.72	-2.73	14.6	Fdxacb1
9	107580532	107580652	ENSMUSG00000079334	-5	-3.94	14.6	Nat6
10	11281714	11289660	ENSMUSG00000047648	-3.72	-2.73	14.6	Fbxo30
10	99109894	99110643	ENSMUSG00000090035	-47.2	-45	14.6	Galnt4
11	16282280	16282521	ENSMUSG00000048834	-11.6	-10.2	14.6	Vstm2a
11	119264907	119265087	ENSMUSG00000039963	-4.3	-3.28	14.6	Ccdc40
11	3907377	3907616	ENSMUSG00000048807	-8.03	-6.81	14.6	Slc35e4
11	76211513	76211693	ENSMUSG00000017286	-3.72	-2.73	14.6	Glod4
11	76211526	76211706	ENSMUSG00000049396	-3.72	-2.73	14.6	Gemin4
11	97627833	97627982	ENSMUSG00000043439	-3.72	-2.73	14.6	Epop
12	81722237	81722298	ENSMUSG00000042724	-3.72	-2.73	14.6	Map3k9
12	84172799	84173070	ENSMUSG00000042507	-16.7	-15.2	14.6	Elmsan1
13	74360658	74360749	ENSMUSG00000021578	-3.72	-2.73	14.6	Ccdc127
13	74360655	74360775	ENSMUSG00000021579	-3.72	-2.73	14.6	Lrrc14b
14	30524070	30524220	ENSMUSG00000021962	-3.72	-2.73	14.6	Dcp1a
14	47289942	47290063	ENSMUSG00000048379	-4.3	-3.28	14.6	Socs4
14	54894789	54895028	ENSMUSG00000022194	-33.6	-31.7	14.6	Pabpn1
15	90227455	90227696	ENSMUSG00000075470	-20	-18.4	14.6	Alg10b
16	4039065	4039246	ENSMUSG00000005980	-7.18	-6	14.6	Dnase1
16	93590493	93590674	ENSMUSG00000022948	-4.52	-3.48	14.6	Setd4
16	96159124	96159275	ENSMUSG00000045275	-3.72	-2.73	14.6	Lca5l
17	33382131	33382252	ENSMUSG00000055240	-3.72	-2.73	14.6	Zfp101
17	34977879	34978058	ENSMUSG00000073415	-3.72	-2.73	14.6	--
18	37714973	37715184	ENSMUSG00000103472	-7.18	-6	14.6	Pcdhga7
18	73590780	73590841	ENSMUSG00000037253	-3.72	-2.73	14.6	Mex3c
18	84209384	84209865	ENSMUSG00000048410	-10.1	-8.83	14.6	Zfp407
19	46762940	46763240	ENSMUSG00000064105	-7.18	-6	14.6	Cnnm2
19	3585007	3585098	ENSMUSG00000024913	-3.72	-2.73	14.6	Lrp5
19	5081370	5081759	ENSMUSG00000061451	-12.2	-10.8	14.6	Tmem151a
4	53262614	53262735	ENSMUSG00000086712	-3.72	-2.73	14.6	--
3	148816960	148817650	ENSMUSG00000028184	-82.2	-79.6	14.5	Adgrl2
6	8592966	8593476	ENSMUSG00000029638	-77.3	-74.7	14.5	Glcci1
7	127608225	127608973	ENSMUSG00000045639	-53	-50.8	14.5	Zfp629
14	65075583	65076211	ENSMUSG00000021978	-63.3	-60.9	14.5	Extl3
1	72859813	72860442	ENSMUSG00000026185	-50.8	-48.6	14.4	Igfbp5
2	31801140	31802100	ENSMUSG00000026842	-64.2	-61.8	14.4	Abl1
3	19227414	19229710	ENSMUSG00000069094	-45.1	-42.9	14.4	Pde7a
5	118262327	118262656	ENSMUSG00000032840	-21.4	-19.8	14.4	2410131K14Rik
11	119038604	119039382	ENSMUSG00000025578	-53.1	-50.8	14.4	Cbx8
17	47688088	47688386	ENSMUSG00000033475	-26.8	-25	14.4	Tomm6
17	47688065	47688544	ENSMUSG00000079444	-36.6	-34.7	14.4	Gm21981
2	25707211	25708216	ENSMUSG00000087612	-26.1	-24.4	14.3	--
4	22376814	22385913	ENSMUSG00000040410	-20.3	-18.6	14.3	Fbxl4
4	125071688	125072873	ENSMUSG00000050213	-36.6	-34.6	14.3	Snip1
8	71359753	71360713	ENSMUSG00000004677	-42.4	-40.3	14.3	Myo9b
8	83271051	83271709	ENSMUSG00000031709	-207	-204	14.3	Tbc1d9
11	62779642	62780241	ENSMUSG00000047342	-17.1	-15.5	14.3	Zfp286
12	112978229	112978617	ENSMUSG00000002803	-20.3	-18.6	14.3	Btbd6
12	112821457	112821818	ENSMUSG00000047832	-65.7	-63.3	14.3	Cdca4
19	41846888	41847392	ENSMUSG00000047604	-58.7	-56.3	14.3	Frat2
1	133132996	133133356	ENSMUSG00000046062	-7.76	-6.56	14.2	Ppp1r15b
2	3226255	3226793	ENSMUSG00000050530	-9.64	-8.36	14.2	Fam171a1
2	120041533	120042014	ENSMUSG00000033852	-43.6	-41.5	14.2	Gm28042
2	120041534	120042013	ENSMUSG00000098488	-43.6	-41.5	14.2	Pla2g4b
2	157469826	157470365	ENSMUSG00000027646	-40	-38	14.2	Src
4	128565828	128566128	ENSMUSG00000028804	-13.5	-12.1	14.2	Csmd2
5	113941973	113942183	ENSMUSG00000042121	-6.95	-5.79	14.2	Ssh1
7	37479387	37479986	ENSMUSG00000043456	-61.3	-58.9	14.2	Zfp536
7	134918202	134918443	ENSMUSG00000073805	-6.95	-5.79	14.2	Fam196a
8	70451412	70452309	ENSMUSG00000055707	-26.5	-24.8	14.2	Klhl26
10	116417950	116418280	ENSMUSG00000054934	-28.5	-26.7	14.2	Kcnmb4
11	97511856	97512156	ENSMUSG00000038453	-26.5	-24.8	14.2	Srcin1
12	26478489	26478729	ENSMUSG00000020638	-6.95	-5.79	14.2	Cmpk2
14	54479897	54480253	ENSMUSG00000022176	-10.8	-9.45	14.2	Rem2
14	57699364	57699634	ENSMUSG00000021959	-21.6	-20	14.2	Lats2
17	26742134	26742315	ENSMUSG00000048249	-6.95	-5.79	14.2	Crebrf
17	86630089	86654812	ENSMUSG00000045038	-7.77	-6.56	14.2	Prkce
4	11961406	11961675	ENSMUSG00000049225	-16.7	-15.2	14.1	Pdp1
4	88721063	88721452	ENSMUSG00000070923	-59.5	-57.1	14.1	Klhl9
6	65703259	65703829	ENSMUSG00000049001	-38	-36	14.1	Ndnf
9	25150743	25151193	ENSMUSG00000008429	-47.2	-45.1	14.1	Herpud2
10	80311620	80314014	ENSMUSG00000020135	-62.9	-60.5	14.1	Apc2
16	30601244	30601782	ENSMUSG00000046546	-54.4	-52.1	14.1	Fam43a
16	32471453	32471813	ENSMUSG00000005615	-38.4	-36.3	14.1	Pcyt1a
19	45007839	45008078	ENSMUSG00000025209	-19.8	-18.2	14.1	Twnk
2	120745728	120746119	ENSMUSG00000027284	-16.4	-14.9	14	Cdan1
11	57327521	57327761	ENSMUSG00000020524	-13.3	-11.9	14	Gria1
11	77692730	77693209	ENSMUSG00000037857	-13.5	-12.1	14	Nufip2
11	73184219	73184548	ENSMUSG00000005949	-35.7	-33.7	14	Ctns
5	23702614	23702914	ENSMUSG00000105987	-22.9	-21.3	14	--
9	4419628	4424379	ENSMUSG00000025892	-89.3	-86.6	13.9	Gria4
9	119240075	119240464	ENSMUSG00000036737	-25.8	-24.1	13.9	Oxsr1
14	49013952	49014313	ENSMUSG00000061244	-31.8	-29.9	13.9	Exoc5
1	36558712	36559130	ENSMUSG00000087589	-4.74	-3.69	13.8	--
1	130718917	130719098	ENSMUSG00000046404	-3.5	-2.52	13.8	Yod1
1	166311143	166311233	ENSMUSG00000040612	-3.5	-2.52	13.8	Ildr2
2	29145180	29145331	ENSMUSG00000043535	-6.73	-5.57	13.8	Setx
2	106867581	106867790	ENSMUSG00000016386	-6.73	-5.58	13.8	Mpped2
2	118693401	118693492	ENSMUSG00000074923	-3.5	-2.52	13.8	Pak6
2	153269857	153270037	ENSMUSG00000046020	-3.5	-2.52	13.8	Pofut1
2	104148318	104148469	ENSMUSG00000068373	-3.5	-2.52	13.8	D430041D05Rik
2	105660985	105661164	ENSMUSG00000102424	-6.73	-5.57	13.8	--
3	9436633	9436813	ENSMUSG00000097365	-4.77	-3.72	13.8	--
3	9436609	9436820	ENSMUSG00000040209	-4.8	-3.74	13.8	Zfp704
3	107331098	107331428	ENSMUSG00000048109	-6.53	-5.39	13.8	Rbm15
4	28821099	28821430	ENSMUSG00000028289	-12.6	-11.2	13.8	Epha7
4	119201149	119201239	ENSMUSG00000028643	-6.34	-5.2	13.8	Svbp
4	123936787	123936997	ENSMUSG00000028646	-12.5	-11.1	13.8	Rragc
4	70216975	70217096	ENSMUSG00000039298	-3.5	-2.52	13.8	Cdk5rap2
4	141683058	141683268	ENSMUSG00000078515	-8.63	-7.39	13.8	Ddi2
5	109942885	109943006	ENSMUSG00000090015	-3.5	-2.52	13.8	Gm15446
5	129901674	129902005	ENSMUSG00000034173	-4.45	-3.42	13.8	Zbed5
5	137287798	137287889	ENSMUSG00000023328	-3.5	-2.52	13.8	Ache
5	25310190	25310640	ENSMUSG00000038056	-10.8	-9.51	13.8	Kmt2c
6	70892890	70893221	ENSMUSG00000031668	-34	-32.1	13.8	Eif2ak3
6	86272130	86272370	ENSMUSG00000029999	-11.1	-9.74	13.8	Tgfa
6	122812308	122812428	ENSMUSG00000107868	-3.5	-2.52	13.8	--
6	142361792	142362182	ENSMUSG00000041671	-19.5	-17.9	13.8	Pyroxd1
6	28126008	28126129	ENSMUSG00000024211	-3.5	-2.52	13.8	Grm8
6	124706205	124706296	ENSMUSG00000004268	-3.5	-2.52	13.8	Emg1
7	12891244	12891304	ENSMUSG00000060397	-3.5	-2.52	13.8	Zfp128
7	12970385	12970774	ENSMUSG00000004500	-14.4	-13	13.8	Zfp324
7	16869895	16870016	ENSMUSG00000041187	-3.5	-2.52	13.8	Prkd2
7	28467045	28467704	ENSMUSG00000030600	-34.3	-32.4	13.8	Lrfn1
7	30133935	30134324	ENSMUSG00000074220	-6.76	-5.6	13.8	Zfp382
7	35391033	35391154	ENSMUSG00000030494	-3.5	-2.52	13.8	Rhpn2
7	44816265	44818457	ENSMUSG00000109511	-5.03	-3.97	13.8	Nup62
7	80863177	80863387	ENSMUSG00000038797	-7.81	-6.61	13.8	Zscan2
7	93081268	93081419	ENSMUSG00000051515	-3.5	-2.52	13.8	Fam181b
7	97299102	97299192	ENSMUSG00000004508	-3.88	-2.88	13.8	Gab2
7	127237909	127238059	ENSMUSG00000045598	-6.93	-5.77	13.8	Zfp553
7	28371760	28371851	ENSMUSG00000037552	-3.5	-2.52	13.8	Plekhg2
7	45825371	45826028	ENSMUSG00000053801	-26.8	-25.1	13.8	Grwd1
7	98351952	98352103	ENSMUSG00000049580	-3.5	-2.52	13.8	Tsku
7	102239211	102239330	ENSMUSG00000073982	-3.5	-2.52	13.8	Rhog
7	140955927	140955987	ENSMUSG00000060591	-3.5	-2.52	13.8	Ifitm2
8	70865098	70865159	ENSMUSG00000020887	-3.5	-2.52	13.8	--
8	92853210	92853390	ENSMUSG00000031740	-6.53	-5.38	13.8	Mmp2
8	94268833	94286612	ENSMUSG00000032939	-5.56	-4.46	13.8	Nup93
8	124030073	124030223	ENSMUSG00000031976	-3.5	-2.52	13.8	Urb2
8	11005401	11005821	ENSMUSG00000038894	-6.89	-5.73	13.8	Irs2
8	78505417	78505626	ENSMUSG00000037070	-20	-18.4	13.8	Rbmxl1
9	40783530	40783710	ENSMUSG00000032024	-3.5	-2.52	13.8	Clmp
9	74889718	74889868	ENSMUSG00000093662	-3.5	-2.52	13.8	--
9	74889724	74889874	ENSMUSG00000043013	-3.5	-2.52	13.8	Onecut1
9	86467213	86485504	ENSMUSG00000034973	-4.46	-3.42	13.8	Dopey1
9	44378982	44379246	ENSMUSG00000111088	-7.53	-6.34	13.8	--
9	77431689	77431929	ENSMUSG00000032352	-35.3	-33.4	13.8	Lrrc1
9	108051533	108051743	ENSMUSG00000041528	-8.51	-7.28	13.8	Rnf123
10	53348798	53348889	ENSMUSG00000038594	-3.5	-2.52	13.8	Cep85l
10	77901034	77901124	ENSMUSG00000051652	-3.5	-2.52	13.8	Lrrc3
10	85120204	85120353	ENSMUSG00000049038	-6.73	-5.57	13.8	Mterf2
11	60731518	60732145	ENSMUSG00000018599	-12.7	-11.3	13.8	Mief2
11	60784038	60784219	ENSMUSG00000049323	-6.73	-5.57	13.8	Smcr8
11	76211534	76211685	ENSMUSG00000069808	-3.5	-2.52	13.8	Fam57a
11	89016726	89016907	ENSMUSG00000000275	-9.15	-7.89	13.8	Trim25
11	115243610	115243671	ENSMUSG00000045980	-3.5	-2.52	13.8	Tmem104
11	31360147	31360298	ENSMUSG00000020303	-3.5	-2.52	13.8	Stc2
11	100463331	100463720	ENSMUSG00000048732	-18.1	-16.5	13.8	Klhl11
11	101162708	101162948	ENSMUSG00000035172	-13	-11.6	13.8	Plekhh3
11	119346048	119346109	ENSMUSG00000005043	-3.5	-2.52	13.8	Sgsh
12	61839567	61839718	ENSMUSG00000035653	-3.5	-2.52	13.8	Lrfn5
12	102949068	102949219	ENSMUSG00000021198	-3.5	-2.52	13.8	Unc79
12	31640730	31640820	ENSMUSG00000020648	-3.5	-2.52	13.8	Dus4l
13	85215679	85215980	ENSMUSG00000021549	-14.5	-13.1	13.8	Rasa1
14	32577035	32577126	ENSMUSG00000054051	-3.5	-2.52	13.8	Ercc6
14	63665824	63666065	ENSMUSG00000035067	-10.3	-9.03	13.8	Xkr6
14	55560028	55560087	ENSMUSG00000053588	-3.5	-2.52	13.8	A730061H03Rik
15	34530020	34530080	ENSMUSG00000022325	-3.5	-2.52	13.8	Pop1
15	61989925	61989986	ENSMUSG00000022346	-3.5	-2.52	13.8	Myc
15	84702953	84703134	ENSMUSG00000036106	-3.5	-2.52	13.8	Prr5
15	79252240	79252301	ENSMUSG00000032988	-3.5	-2.52	13.8	Slc16a8
15	100481217	100481397	ENSMUSG00000044636	-3.5	-2.52	13.8	Csrnp2
16	13677580	13677730	ENSMUSG00000079737	-3.5	-2.52	13.8	3110001I22Rik
16	17259174	17259414	ENSMUSG00000050240	-4.29	-3.27	13.8	Hic2
16	32277967	32278028	ENSMUSG00000014074	-3.5	-2.52	13.8	Rnf168
16	8635607	8637534	ENSMUSG00000043140	-30.7	-28.8	13.8	Tmem186
17	17265021	17265200	ENSMUSG00000116802	-3.66	-2.68	13.8	--
17	25574083	25574234	ENSMUSG00000091475	-3.5	-2.52	13.8	--
17	32883874	32884084	ENSMUSG00000095325	-4.3	-3.28	13.8	Zfp870
17	84191853	84192094	ENSMUSG00000024251	-13.7	-12.3	13.8	Thada
18	34861675	34861736	ENSMUSG00000038418	-3.5	-2.52	13.8	Egr1
18	37422969	37423179	ENSMUSG00000051486	-9.55	-8.27	13.8	Pcdhb11
18	37686942	37687533	ENSMUSG00000103677	-9.73	-8.45	13.8	Pcdhga4
18	61585423	61585544	ENSMUSG00000024576	-3.5	-2.52	13.8	Csnk1a1
18	75393958	75394229	ENSMUSG00000025880	-5.83	-4.72	13.8	Smad7
18	88870561	88870741	ENSMUSG00000056153	-6.73	-5.58	13.8	Socs6
19	46878465	46878586	ENSMUSG00000064105	-3.5	-2.52	13.8	Cnnm2
19	47267878	47267999	ENSMUSG00000053617	-3.5	-2.52	13.8	Sh3pxd2a
19	47268747	47268838	ENSMUSG00000053617	-3.5	-2.52	13.8	Sh3pxd2a
19	58238116	58238297	ENSMUSG00000025089	-6.73	-5.57	13.8	Gfra1
X	48406069	48406220	ENSMUSG00000036959	-6.73	-5.57	13.8	Bcorl1
X	21031087	21031148	ENSMUSG00000054737	-3.5	-2.52	13.8	Zfp182
X	94078761	94079331	ENSMUSG00000079509	-10.1	-8.76	13.8	Zfx
X	105929102	105929373	ENSMUSG00000031229	-12.2	-10.8	13.8	Atrx
7	78301742	78301803	ENSMUSG00000059146	-3.5	-2.52	13.8	Ntrk3
9	121759166	121759406	ENSMUSG00000097820	-5.13	-4.06	13.8	--
11	50256679	50256949	ENSMUSG00000050567	-19.1	-17.6	13.7	Maml1
2	121138975	121139545	ENSMUSG00000074890	-37	-35	13.7	Lcmt2
8	107046786	107048080	ENSMUSG00000078931	-45.1	-43	13.7	Pdf
2	4908043	4908493	ENSMUSG00000026662	-31.2	-29.3	13.6	Sephs1
6	47930826	47931124	ENSMUSG00000052763	-67.9	-65.5	13.6	Zfp212
7	5032785	5033056	ENSMUSG00000074405	-12.8	-11.5	13.6	Zfp865
8	36103717	36103957	ENSMUSG00000050271	-17.1	-15.6	13.6	Prag1
8	120608601	120608777	ENSMUSG00000043687	-13.3	-11.9	13.6	1190005I06Rik
9	21211154	21211394	ENSMUSG00000032177	-9.69	-8.41	13.6	Pde4a
11	65828260	65828676	ENSMUSG00000018347	-25.2	-23.4	13.6	Zkscan6
13	21369323	21369683	ENSMUSG00000036721	-34	-32	13.6	Zscan12
13	63899012	63899583	ENSMUSG00000021470	-17.1	-15.6	13.6	Ercc6l2
13	90104367	90104607	ENSMUSG00000012422	-27.3	-25.5	13.6	Tmem167
13	38932673	38932913	ENSMUSG00000021432	-12.8	-11.5	13.6	Slc35b3
14	75703608	75703998	ENSMUSG00000034893	-18.9	-17.3	13.6	Cog3
19	46877867	46878317	ENSMUSG00000064105	-14.7	-13.2	13.6	Cnnm2
4	120921345	120922214	ENSMUSG00000028629	-22	-20.3	13.6	Exo5
3	124321392	124321752	ENSMUSG00000044528	-51.7	-49.4	13.5	Tram1l1
4	151980756	151981447	ENSMUSG00000039768	-42.7	-40.6	13.5	Dnajc11
8	109939847	109940207	ENSMUSG00000031732	-36.3	-34.4	13.5	Phlpp2
17	15768681	15770452	ENSMUSG00000023852	-25	-23.2	13.5	Chd1
3	82392695	82393234	ENSMUSG00000033900	-19.1	-17.5	13.4	Map9
4	130792536	130792747	ENSMUSG00000025743	-6.62	-5.47	13.4	Sdc3
5	122443804	122444373	ENSMUSG00000029466	-44	-41.9	13.4	Anapc7
5	92083508	92083719	ENSMUSG00000029405	-7.84	-6.63	13.4	G3bp2
7	12982036	12982964	ENSMUSG00000033961	-24.7	-23	13.4	Zfp446
7	96873919	96874100	ENSMUSG00000048078	-6.5	-5.36	13.4	Tenm4
7	98716656	98716897	ENSMUSG00000030753	-29	-27.2	13.4	Thap12
8	119941289	119942069	ENSMUSG00000031826	-110	-107	13.4	Usp10
8	123214534	123215043	ENSMUSG00000048478	-18.8	-17.2	13.4	Spata33
8	72483279	72483760	ENSMUSG00000019731	-47.5	-45.4	13.4	Slc35e1
8	107045024	107047186	ENSMUSG00000078931	-38.2	-36.2	13.4	Pdf
9	111273182	111274048	ENSMUSG00000046785	-38.7	-36.7	13.4	Epm2aip1
9	36892209	36892570	ENSMUSG00000035934	-29.6	-27.8	13.4	Pknox2
10	19002168	19002319	ENSMUSG00000019850	-6.5	-5.36	13.4	Tnfaip3
10	43525162	43525341	ENSMUSG00000019797	-12.6	-11.2	13.4	1700021F05Rik
11	89016397	89016548	ENSMUSG00000000275	-6.5	-5.36	13.4	Trim25
11	103139756	103139876	ENSMUSG00000043372	-6.5	-5.36	13.4	Hexim2
11	30977303	30977483	ENSMUSG00000020309	-7.97	-6.75	13.4	Chac2
12	116061621	116061801	ENSMUSG00000042063	-6.5	-5.36	13.4	Zfp386
15	67113991	67114141	ENSMUSG00000013846	-6.5	-5.36	13.4	St3gal1
16	77115584	77115764	ENSMUSG00000022867	-6.97	-5.8	13.4	Usp25
17	85602206	85607419	ENSMUSG00000093460	-73	-70.5	13.4	--
1	6214093	6214244	ENSMUSG00000090031	-6.55	-5.4	13.4	--
1	179605368	179610559	ENSMUSG00000038949	-59.4	-57	13.3	Cnst
1	77506827	77507158	ENSMUSG00000026235	-18.5	-16.9	13.3	Epha4
2	70713455	70713995	ENSMUSG00000041997	-16.4	-14.9	13.3	Tlk1
5	75932916	75933337	ENSMUSG00000062960	-10.9	-9.6	13.3	Kdr
8	9770111	9770621	ENSMUSG00000079157	-36.3	-34.4	13.3	Fam155a
9	20593997	20594807	ENSMUSG00000058192	-19	-17.4	13.3	Zfp846
9	32259931	32261401	ENSMUSG00000041444	-65.1	-62.7	13.3	Arhgap32
10	81020748	81021165	ENSMUSG00000043670	-27.3	-25.5	13.3	Diras1
11	97362610	97363328	ENSMUSG00000038485	-43.5	-41.4	13.3	Socs7
12	29826969	29827330	ENSMUSG00000061911	-27.5	-25.7	13.3	Myt1l
16	22872138	22872379	ENSMUSG00000004460	-12.2	-10.8	13.3	Dnajb11
16	91655734	91657024	ENSMUSG00000022961	-134	-131	13.3	Son
2	93955868	93956547	ENSMUSG00000087006	-31.5	-29.7	13.2	Gm13889
2	121138983	121139548	ENSMUSG00000074890	-35.4	-33.5	13.2	Lcmt2
3	45380885	45381276	ENSMUSG00000049100	-56.6	-54.3	13.2	Pcdh10
3	62470529	62471373	ENSMUSG00000027770	-38.8	-36.8	13.2	Dhx36
5	128602482	128602722	ENSMUSG00000081683	-12.4	-11	13.2	Fzd10
5	144176057	144176327	ENSMUSG00000038970	-25.3	-23.6	13.2	Lmtk2
7	105755055	105755835	ENSMUSG00000036862	-16.4	-14.9	13.2	Dchs1
8	25767589	25768158	ENSMUSG00000037316	-26.7	-24.9	13.2	Bag4
9	15914657	15915588	ENSMUSG00000074505	-16.1	-14.6	13.2	Fat3
10	43003395	43003665	ENSMUSG00000038248	-24.3	-22.6	13.2	Sobp
10	80833607	80833967	ENSMUSG00000051067	-21.9	-20.2	13.2	Lingo3
6	48438384	48438685	ENSMUSG00000068551	-27	-25.2	13.1	Zfp467
1	60477111	60477292	ENSMUSG00000026782	-9.24	-7.98	13	Abi2
1	63578962	63579023	ENSMUSG00000025964	-3.27	-2.31	13	Adam23
1	127803356	127803866	ENSMUSG00000026349	-88.9	-86.2	13	Ccnt2
1	130719246	130719397	ENSMUSG00000046404	-3.27	-2.31	13	Yod1
1	139170620	139170741	ENSMUSG00000056268	-3.27	-2.31	13	Dennd1b
1	172370530	172370680	ENSMUSG00000044708	-3.66	-2.68	13	Kcnj10
1	9746641	9746942	ENSMUSG00000045210	-6.28	-5.15	13	Vcpip1
1	59162909	59163389	ENSMUSG00000079550	-54.2	-51.9	13	Mpp4
1	111863478	111863538	ENSMUSG00000038702	-3.27	-2.31	13	Dsel
1	132991701	132992181	ENSMUSG00000054387	-60.1	-57.8	13	Mdm4
1	139337178	139337359	ENSMUSG00000063681	-3.97	-2.97	13	Crb1
1	180437272	180437393	ENSMUSG00000053963	-3.27	-2.31	13	Stum
2	66023102	66023253	ENSMUSG00000044647	-3.27	-2.31	13	Csrnp3
2	71856137	71856347	ENSMUSG00000027111	-6.28	-5.15	13	Itga6
2	118834194	118834285	ENSMUSG00000027331	-3.27	-2.31	13	Knstrn
2	131246501	131246771	ENSMUSG00000037523	-4.09	-3.08	13	Mavs
2	178420709	178420950	ENSMUSG00000070476	-9.86	-8.58	13	Fam217b
2	72938040	72938310	ENSMUSG00000027109	-13.5	-12.1	13	Sp3
2	84871923	84872278	ENSMUSG00000050896	-47.4	-45.3	13	Rtn4rl2
2	110362228	110362318	ENSMUSG00000074971	-3.27	-2.31	13	Fibin
2	136083021	136083292	ENSMUSG00000039913	-11.6	-10.2	13	Pak7
2	167036662	167037413	ENSMUSG00000039501	-23.4	-21.7	13	Znfx1
2	167056511	167056602	ENSMUSG00000039501	-3.77	-2.78	13	Znfx1
3	9264759	9264820	ENSMUSG00000069114	-3.27	-2.31	13	Zbtb10
3	88821271	88821571	ENSMUSG00000078684	-35.9	-34	13	--
3	101459912	101460063	ENSMUSG00000042035	-4.3	-3.28	13	Igsf3
3	132838813	132838904	ENSMUSG00000028030	-3.27	-2.31	13	Tbck
3	73048221	73048372	ENSMUSG00000048304	-3.45	-2.48	13	Slitrk3
3	84445706	84445857	ENSMUSG00000041842	-3.27	-2.31	13	Fhdc1
4	15283220	15283341	ENSMUSG00000043252	-3.27	-2.31	13	Tmem64
4	49530296	49530446	ENSMUSG00000039634	-3.27	-2.31	13	Zfp189
4	116830198	116830372	ENSMUSG00000086417	-3.27	-2.31	13	--
4	138439757	138439967	ENSMUSG00000041241	-12.1	-10.8	13	Mul1
4	139318276	139318396	ENSMUSG00000028743	-6.34	-5.2	13	Akr7a5
4	122946999	122947150	ENSMUSG00000028655	-3.45	-2.48	13	Mfsd2a
4	126476926	126477127	ENSMUSG00000082381	-6.28	-5.15	13	--
4	138720441	138720562	ENSMUSG00000043621	-6.28	-5.15	13	Ubxn10
4	141762108	141762559	ENSMUSG00000040697	-18.6	-17	13	Dnajc16
4	142104275	142104426	ENSMUSG00000040606	-6.28	-5.15	13	Kazn
5	30896590	30903075	ENSMUSG00000029165	-4.61	-3.57	13	Agbl5
5	127565192	127565283	ENSMUSG00000034324	-3.27	-2.31	13	Tmem132c
5	138093150	138093421	ENSMUSG00000029729	-12.2	-10.8	13	Zkscan1
5	34217602	34217752	ENSMUSG00000037224	-3.27	-2.31	13	Zfyve28
5	113940805	113941046	ENSMUSG00000042121	-4.61	-3.57	13	Ssh1
5	124062308	124062428	ENSMUSG00000029408	-3.27	-2.31	13	Abcb9
5	143289369	143289489	ENSMUSG00000093910	-3.27	-2.31	13	Zfp853
6	15438047	15438138	ENSMUSG00000029563	-3.27	-2.31	13	Foxp2
6	91233811	91233902	ENSMUSG00000064080	-3.27	-2.31	13	Fbln2
6	115016153	115016274	ENSMUSG00000030316	-3.27	-2.31	13	Tamm41
7	44839144	44839369	ENSMUSG00000074141	-3.27	-2.31	13	Il4i1
7	139256273	139256422	ENSMUSG00000060260	-3.27	-2.31	13	Pwwp2b
7	15989033	15989304	ENSMUSG00000070808	-14.3	-12.8	13	Bicra
7	24228379	24228529	ENSMUSG00000074283	-3.66	-2.68	13	Zfp109
7	132236765	132236856	ENSMUSG00000030930	-3.27	-2.31	13	Chst15
8	14846539	14846660	ENSMUSG00000047495	-3.27	-2.31	13	Dlgap2
8	116940967	116941088	ENSMUSG00000031756	-3.27	-2.31	13	Cenpn
8	25983081	25983529	ENSMUSG00000037251	-22.2	-20.5	13	Pomk
10	82739071	82739311	ENSMUSG00000020246	-11.8	-10.4	13	Hcfc2
10	116273823	116274094	ENSMUSG00000020151	-7.41	-6.23	13	Ptprr
10	34153672	34153823	ENSMUSG00000039497	-3.27	-2.31	13	Dse
10	68096800	68097340	ENSMUSG00000019947	-16.5	-15	13	Arid5b
10	85907466	85908036	ENSMUSG00000035529	-9.93	-8.64	13	Prdm4
11	76213360	76213540	ENSMUSG00000069808	-5.84	-4.72	13	Fam57a
11	80109972	80111492	ENSMUSG00000017550	-3.27	-2.31	13	Atad5
11	112785602	112785903	ENSMUSG00000000567	-26.3	-24.6	13	Sox9
11	59158304	59158485	ENSMUSG00000049287	-7.34	-6.16	13	Iba57
11	76213365	76213545	ENSMUSG00000017286	-5.84	-4.72	13	Glod4
11	94777965	94778055	ENSMUSG00000075610	-3.27	-2.31	13	Tmem92
11	120235498	120235588	ENSMUSG00000085501	-3.34	-2.38	13	--
12	3426946	3427007	ENSMUSG00000037486	-3.27	-2.31	13	Asxl2
12	64921093	64921153	ENSMUSG00000047227	-3.27	-2.31	13	Gm527
12	69963448	69963509	ENSMUSG00000021066	-3.27	-2.31	13	Atl1
12	74897637	74897757	ENSMUSG00000034402	-3.27	-2.31	13	Kcnh5
13	66908039	66908279	ENSMUSG00000074826	-4.49	-3.45	13	Gm10767
13	67667794	67667884	ENSMUSG00000114264	-3.27	-2.31	13	--
13	38955841	38960247	ENSMUSG00000021432	-5.89	-4.77	13	Slc35b3
13	59637135	59637375	ENSMUSG00000021556	-12.1	-10.8	13	Golm1
13	83724948	83725097	ENSMUSG00000097265	-3.27	-2.31	13	--
14	61191425	61191606	ENSMUSG00000048279	-3.27	-2.31	13	Sacs
14	61210210	61210361	ENSMUSG00000048279	-3.27	-2.31	13	Sacs
14	61212818	61213058	ENSMUSG00000048279	-6.28	-5.15	13	Sacs
14	66915943	66916004	ENSMUSG00000046204	-3.27	-2.31	13	Pnma2
14	54875997	54876415	ENSMUSG00000072494	-7.76	-6.56	13	Ppp1r3e
14	101444638	101444728	ENSMUSG00000033083	-3.27	-2.31	13	Tbc1d4
15	23474088	23474328	ENSMUSG00000040420	-8.8	-7.56	13	Cdh18
15	87757325	87758255	ENSMUSG00000054863	-79	-76.4	13	Fam19a5
15	55534153	55538721	ENSMUSG00000022370	-35.5	-33.5	13	Mrpl13
17	21025861	21025922	ENSMUSG00000067942	-3.27	-2.31	13	Zfp160
17	33305450	33305657	ENSMUSG00000091515	-5.51	-4.42	13	--
18	36624584	36624945	ENSMUSG00000024483	-7.26	-6.08	13	Ankhd1
18	37485481	37485572	ENSMUSG00000046387	-3.27	-2.31	13	Pcdhb17
18	21148172	21148323	ENSMUSG00000042680	-3.27	-2.31	13	Garem1
18	60475287	60475436	ENSMUSG00000038059	-3.27	-2.31	13	Smim3
19	29810821	29811330	ENSMUSG00000074909	-12.2	-10.8	13	Ranbp6
X	74035367	74036087	ENSMUSG00000031393	-75.8	-73.2	13	Mecp2
X	122395340	122395431	ENSMUSG00000055733	-3.27	-2.31	13	Nap1l3
7	27989519	27989580	ENSMUSG00000096916	-3.27	-2.31	13	Zfp850
10	80380863	80382392	ENSMUSG00000048696	-74.5	-72	13	Mex3d
3	37320977	37321215	ENSMUSG00000051444	-23.2	-21.5	12.9	Bbs12
5	114611425	114612293	ENSMUSG00000041930	-101	-98.6	12.9	Fam222a
13	115089500	115089796	ENSMUSG00000114255	-21	-19.3	12.9	--
18	37757674	37757974	ENSMUSG00000102742	-12.2	-10.8	12.9	Pcdhga11
1	53347037	53347397	ENSMUSG00000026095	-17.6	-16	12.8	Asnsd1
2	33410977	33411277	ENSMUSG00000068966	-23.2	-21.5	12.8	Zbtb34
7	25272837	25273496	ENSMUSG00000005442	-65.9	-63.5	12.8	Cic
8	3623370	3623581	ENSMUSG00000004630	-9.38	-8.11	12.8	Pcp2
9	59924700	59925361	ENSMUSG00000039585	-45.3	-43.2	12.8	Myo9a
11	82445046	82445346	ENSMUSG00000020701	-17.6	-16	12.8	Tmem132e
13	49383074	49383584	ENSMUSG00000037933	-40.5	-38.5	12.8	Bicd2
18	68267814	68268025	ENSMUSG00000038121	-9.02	-7.76	12.8	Fam210a
1	55078131	55078369	ENSMUSG00000025980	-11.4	-10	12.7	Hspd1
1	88674711	88701221	ENSMUSG00000049866	-126	-123	12.7	Arl4c
4	155865912	155866360	ENSMUSG00000029073	-11.7	-10.4	12.7	Cptp
5	38674466	38674767	ENSMUSG00000046572	-9.73	-8.45	12.7	Zfp518b
7	16117616	16117975	ENSMUSG00000006024	-67.5	-65	12.7	Napa
8	72305023	72305260	ENSMUSG00000070713	-32.8	-30.9	12.7	Gm10282
10	80116490	80117757	ENSMUSG00000003068	-103	-100	12.7	Stk11
10	81460242	81460333	ENSMUSG00000034818	-6.06	-4.94	12.7	Celf5
11	103116230	103116978	ENSMUSG00000048878	-46.5	-44.4	12.7	Hexim1
11	107131976	107132127	ENSMUSG00000040481	-14.7	-13.2	12.7	Bptf
12	76328646	76328856	ENSMUSG00000021057	-23.7	-22	12.7	Akap5
13	81669309	81669939	ENSMUSG00000035840	-24.7	-23	12.7	Lysmd3
15	81650487	81651207	ENSMUSG00000055024	-39.9	-37.9	12.7	Ep300
18	64271812	64272022	ENSMUSG00000056812	-6.06	-4.94	12.7	St8sia3
18	82692963	82693644	ENSMUSG00000097141	-17	-15.4	12.7	--
18	36017856	36018096	ENSMUSG00000060275	-7.18	-6	12.7	Nrg2
4	129616078	129616585	ENSMUSG00000040795	-15.7	-14.2	12.7	Iqcc
18	37686884	37687543	ENSMUSG00000103677	-9.13	-7.88	12.7	Pcdhga4
1	183327200	183327499	ENSMUSG00000056050	-37.4	-35.4	12.6	Mia3
2	120041492	120042003	ENSMUSG00000074899	-43.5	-41.4	12.6	--
2	130635083	130635841	ENSMUSG00000037703	-15.9	-14.5	12.6	Lzts3
4	155156675	155157364	ENSMUSG00000029050	-62.1	-59.7	12.6	Ski
8	70779193	70779553	ENSMUSG00000031833	-35.9	-33.9	12.6	Mast3
9	59314906	59315505	ENSMUSG00000025236	-21.6	-19.9	12.6	Adpgk
11	35797381	35797706	ENSMUSG00000051062	-40.2	-38.2	12.6	Fbll1
12	110793115	110794312	ENSMUSG00000037957	-77.7	-75.1	12.6	Wdr20
17	25782046	25782525	ENSMUSG00000002280	-95.1	-92.3	12.6	Narfl
X	103481843	103482652	ENSMUSG00000085715	-96.8	-94	12.6	--
2	92613999	92614297	ENSMUSG00000027221	-24.5	-22.8	12.5	Chst1
5	124340616	124341036	ENSMUSG00000047635	-18.7	-17.1	12.5	2810006K23Rik
5	150799696	150805321	ENSMUSG00000034021	-40.6	-38.5	12.5	Pds5b
7	98590222	98590882	ENSMUSG00000035401	-26.7	-24.9	12.5	Emsy
8	11635606	11635757	ENSMUSG00000031508	-23.7	-22	12.5	Ankrd10
9	20606992	20607319	ENSMUSG00000111547	-16.3	-14.8	12.5	--
10	80380866	80381987	ENSMUSG00000048696	-50	-47.8	12.5	Mex3d
11	106073288	106073524	ENSMUSG00000001983	-19.8	-18.2	12.5	Taco1
11	77045670	77046091	ENSMUSG00000037958	-41.9	-39.8	12.5	Nsrp1
12	65105128	65105458	ENSMUSG00000055884	-12.2	-10.8	12.5	Fancm
12	103404323	103404712	ENSMUSG00000021203	-39	-37	12.5	Otub2
14	51989066	51989456	ENSMUSG00000004562	-17.5	-15.9	12.5	Arhgef40
17	25566790	25567241	ENSMUSG00000024176	-22.2	-20.5	12.5	Sox8
1	180726042	180729881	ENSMUSG00000026499	-22.2	-20.6	12.4	Acbd3
2	24791724	24792054	ENSMUSG00000036893	-71.3	-68.8	12.4	Ehmt1
2	75676140	75676350	ENSMUSG00000015839	-22.3	-20.6	12.4	Nfe2l2
4	155739814	155740204	ENSMUSG00000084845	-36.4	-34.4	12.4	Tmem240
5	41816365	41816845	ENSMUSG00000061755	-26.6	-24.8	12.4	Bod1l
7	27580575	27580934	ENSMUSG00000049643	-32.6	-30.7	12.4	2310022A10Rik
7	96895283	96895524	ENSMUSG00000048078	-19.6	-18	12.4	Tenm4
7	126152707	126153098	ENSMUSG00000000131	-59.1	-56.7	12.4	Xpo6
11	107733935	107734204	ENSMUSG00000020723	-47.7	-45.6	12.4	Cacng4
14	21670318	21671068	ENSMUSG00000021767	-73.7	-71.2	12.4	Kat6b
9	100552667	100552968	ENSMUSG00000070287	-36.6	-34.7	12.4	Slc35g2
1	37261285	37261376	ENSMUSG00000026114	-3.05	-2.11	12.3	Cnga3
1	104934065	104934275	ENSMUSG00000050840	-11.3	-9.95	12.3	Cdh20
1	139447095	139447456	ENSMUSG00000033964	-8.14	-6.92	12.3	Zbtb41
1	165310881	165310941	ENSMUSG00000040836	-3.05	-2.11	12.3	Gpr161
1	180689675	180689946	ENSMUSG00000058729	-4.24	-3.22	12.3	Lin9
2	6027382	6029376	ENSMUSG00000043241	-3.05	-2.11	12.3	Upf2
2	173706624	173706715	ENSMUSG00000027519	-3.05	-2.11	12.3	Rab22a
2	102450171	102450977	ENSMUSG00000075012	-17.4	-15.9	12.3	Fjx1
2	146342206	146342417	ENSMUSG00000037110	-3.24	-2.29	12.3	Ralgapa2
2	151716500	151716621	ENSMUSG00000032869	-3.05	-2.11	12.3	Psmf1
2	166567149	166567389	ENSMUSG00000039621	-15.6	-14.1	12.3	Prex1
3	51473720	51473781	ENSMUSG00000063273	-3.05	-2.11	12.3	Naa15
3	61364629	61364750	ENSMUSG00000036894	-3.05	-2.11	12.3	Rap2b
3	86349131	86350390	ENSMUSG00000028080	-3.85	-2.85	12.3	Lrba
3	132839861	132839951	ENSMUSG00000028030	-3.05	-2.11	12.3	Tbck
3	134239574	134239964	ENSMUSG00000044365	-6.27	-5.13	12.3	Cxxc4
3	154764252	154764433	ENSMUSG00000078161	-5.61	-4.51	12.3	Erich3
3	61364637	61364757	ENSMUSG00000053706	-3.05	-2.11	12.3	B430305J03Rik
3	84164966	84165147	ENSMUSG00000027993	-9.19	-7.93	12.3	Trim2
3	95774021	95774201	ENSMUSG00000028106	-4.5	-3.47	12.3	Rprd2
3	104015028	104016049	ENSMUSG00000052539	-18.1	-16.6	12.3	Magi3
3	105678388	105678866	ENSMUSG00000027905	-19.1	-17.5	12.3	Ddx20
4	24903362	24903482	ENSMUSG00000028261	-3.05	-2.11	12.3	Ndufaf4
4	63135721	63135812	ENSMUSG00000028358	-3.05	-2.11	12.3	Zfp618
4	116598869	116599049	ENSMUSG00000034035	-3.88	-2.88	12.3	Ccdc17
4	134425739	134425889	ENSMUSG00000037366	-3.45	-2.48	12.3	Pafah2
4	139616676	139616737	ENSMUSG00000041025	-3.05	-2.11	12.3	Iffo2
4	140986872	140986933	ENSMUSG00000036622	-3.12	-2.17	12.3	Atp13a2
4	150866414	150866773	ENSMUSG00000028967	-7.76	-6.56	12.3	Errfi1
4	4133886	4134036	ENSMUSG00000045573	-3.45	-2.48	12.3	Penk
4	24649627	24649748	ENSMUSG00000040387	-5.37	-4.28	12.3	Klhl32
4	126492983	126493044	ENSMUSG00000042500	-3.05	-2.11	12.3	Ago4
4	129432553	129432853	ENSMUSG00000048485	-4.5	-3.47	12.3	Zbtb8b
4	132727980	132728040	ENSMUSG00000037752	-3.05	-2.11	12.3	Xkr8
4	149468583	149468763	ENSMUSG00000028992	-5.84	-4.72	12.3	Nmnat1
5	37149301	37149392	ENSMUSG00000117286	-3.05	-2.11	12.3	Gm1043
5	106216328	106216565	ENSMUSG00000105600	-7.96	-6.75	12.3	--
5	19203415	19203565	ENSMUSG00000097626	-3.05	-2.11	12.3	--
5	32829572	32829722	ENSMUSG00000054280	-3.45	-2.48	12.3	Prr14l
5	36571255	36571945	ENSMUSG00000029192	-14.3	-12.9	12.3	Tbc1d14
5	72556145	72556386	ENSMUSG00000072889	-4.4	-3.37	12.3	Nfxl1
5	107909363	107909424	ENSMUSG00000029270	-3.05	-2.11	12.3	Fam69a
5	115300789	115300999	ENSMUSG00000009013	-8.6	-7.36	12.3	Dynll1
5	119575496	119575617	ENSMUSG00000087516	-3.05	-2.11	12.3	--
5	144876763	144876943	ENSMUSG00000038780	-6.23	-5.1	12.3	Smurf1
5	147018378	147018494	ENSMUSG00000016520	-3.05	-2.11	12.3	Lnx2
6	90466897	90466987	ENSMUSG00000030087	-3.05	-2.11	12.3	Klf15
6	34156768	34156858	ENSMUSG00000018999	-5.84	-4.72	12.3	Slc35b4
6	38292041	38292132	ENSMUSG00000047749	-3.05	-2.11	12.3	Zc3hav1l
6	134869152	134869510	ENSMUSG00000032641	-29.5	-27.7	12.3	Gpr19
6	135733129	135733250	ENSMUSG00000030209	-3.05	-2.11	12.3	Grin2b
7	19857970	19858146	ENSMUSG00000092216	-5.84	-4.72	12.3	Gm19345
7	126490521	126490701	ENSMUSG00000073838	-5.84	-4.72	12.3	Tufm
7	67514909	67514970	ENSMUSG00000030556	-3.05	-2.11	12.3	Lrrc28
7	80090016	80090135	ENSMUSG00000108655	-3.05	-2.11	12.3	--
7	92605082	92605143	ENSMUSG00000041343	-3.05	-2.11	12.3	Ankrd42
7	128236422	128236512	ENSMUSG00000062944	-3.05	-2.11	12.3	9130023H24Rik
7	135696997	135697208	ENSMUSG00000031004	-8.58	-7.34	12.3	Mki67
7	144579879	144580058	ENSMUSG00000031077	-3.88	-2.88	12.3	Fadd
8	36146440	36146500	ENSMUSG00000050271	-3.05	-2.11	12.3	Prag1
8	45088356	45088476	ENSMUSG00000054764	-3.05	-2.11	12.3	Mtnr1a
8	80880810	80880990	ENSMUSG00000109587	-5.84	-4.72	12.3	--
8	86746252	86746311	ENSMUSG00000074178	-3.05	-2.11	12.3	Gm10638
8	110221385	110221445	ENSMUSG00000046441	-3.05	-2.11	12.3	Cmtr2
8	84173819	84173969	ENSMUSG00000056155	-3.88	-2.88	12.3	Nanos3
8	124896182	124896242	ENSMUSG00000074030	-3.05	-2.11	12.3	Exoc8
9	22239698	22239788	ENSMUSG00000057982	-3.05	-2.11	12.3	Zfp809
9	48398651	48398712	ENSMUSG00000044229	-3.05	-2.11	12.3	Nxpe4
9	57504943	57505152	ENSMUSG00000062309	-11.3	-9.95	12.3	Rpp25
9	58006084	58006144	ENSMUSG00000097604	-3.05	-2.11	12.3	--
9	72951520	72951761	ENSMUSG00000034910	-6.27	-5.13	12.3	Pygo1
9	90054528	90054679	ENSMUSG00000032359	-3.05	-2.11	12.3	Ctsh
9	119464558	119464708	ENSMUSG00000042787	-3.05	-2.11	12.3	Exog
9	21801238	21801577	ENSMUSG00000032198	-3.05	-2.11	12.3	Dock6
9	58876782	58876963	ENSMUSG00000032340	-5.84	-4.72	12.3	Neo1
9	72409348	72409409	ENSMUSG00000097211	-3.05	-2.11	12.3	--
9	73039538	73039629	ENSMUSG00000079469	-3.05	-2.11	12.3	Pigb
10	14149516	14149756	ENSMUSG00000015501	-7.76	-6.56	12.3	Hivep2
10	29144196	29146981	ENSMUSG00000038916	-26.4	-24.7	12.3	Soga3
10	79724458	79724608	ENSMUSG00000020331	-5.17	-4.1	12.3	Hcn2
10	7119991	7120052	ENSMUSG00000015202	-3.05	-2.11	12.3	Cnksr3
11	59456713	59456803	ENSMUSG00000036819	-3.05	-2.11	12.3	Jmjd4
11	80209018	80209229	ENSMUSG00000017686	-10.4	-9.12	12.3	Rhot1
11	59199865	59200220	ENSMUSG00000085882	-43.7	-41.6	12.3	--
11	62728523	62728584	ENSMUSG00000005267	-3.05	-2.11	12.3	Zfp287
11	76779921	76780132	ENSMUSG00000020841	-8.35	-7.12	12.3	Cpd
11	81152628	81153046	ENSMUSG00000020704	-11.3	-9.95	12.3	Asic2
11	95569117	95569477	ENSMUSG00000000120	-16.7	-15.2	12.3	Ngfr
12	103112697	103113207	ENSMUSG00000021198	-36.7	-34.7	12.3	Unc79
12	116145961	116146261	ENSMUSG00000011171	-29.4	-27.5	12.3	Vipr2
12	54916597	54916718	ENSMUSG00000035021	-3.05	-2.11	12.3	Baz1a
12	58267945	58268006	ENSMUSG00000045930	-3.05	-2.11	12.3	Clec14a
12	81294662	81315296	ENSMUSG00000079055	-34	-32.1	12.3	Slc8a3
12	118237951	118238341	ENSMUSG00000025323	-13	-11.6	12.3	Sp4
13	73951474	73955422	ENSMUSG00000057649	-13.8	-12.4	12.3	Brd9
13	90111760	90111881	ENSMUSG00000012422	-3.05	-2.11	12.3	Tmem167
13	54052141	54052322	ENSMUSG00000021478	-3.61	-2.63	12.3	Drd1
14	55560035	55560096	ENSMUSG00000022214	-3.05	-2.11	12.3	Dcaf11
14	55854009	55854070	ENSMUSG00000075592	-3.05	-2.11	12.3	Nynrin
14	76134869	76134959	ENSMUSG00000022009	-3.05	-2.11	12.3	Nufip1
14	56728549	56748626	ENSMUSG00000021938	-4.24	-3.22	12.3	Pspc1
15	76459212	76459331	ENSMUSG00000034161	-3.05	-2.11	12.3	Scx
15	89067837	89068017	ENSMUSG00000058441	-3.05	-2.11	12.3	Panx2
15	13034216	13034606	ENSMUSG00000039385	-6.13	-5	12.3	Cdh6
15	50846715	50846866	ENSMUSG00000038679	-5.84	-4.72	12.3	Trps1
15	76001898	76002048	ENSMUSG00000046761	-3.24	-2.29	12.3	Fam83h
15	86471263	86471384	ENSMUSG00000115918	-3.05	-2.11	12.3	--
15	95972767	95975046	ENSMUSG00000115049	-3.05	-2.11	12.3	--
15	96641682	96641803	ENSMUSG00000023169	-3.05	-2.11	12.3	Slc38a1
15	97975601	97976685	ENSMUSG00000022483	-104	-101	12.3	Col2a1
16	17212845	17212936	ENSMUSG00000071636	-3.05	-2.11	12.3	Rimbp3
16	32256575	32257083	ENSMUSG00000022787	-17.1	-15.6	12.3	Wdr53
16	22162968	22163029	ENSMUSG00000033581	-3.05	-2.11	12.3	Igf2bp2
16	57627246	57627397	ENSMUSG00000068196	-3.05	-2.11	12.3	Col8a1
17	33817998	33818389	ENSMUSG00000042099	-59.4	-57	12.3	Kank3
17	35384275	35384455	ENSMUSG00000035929	-4.07	-3.06	12.3	H2-Q4
17	12943697	12943877	ENSMUSG00000023832	-8.58	-7.34	12.3	Acat2
17	22146212	22146303	ENSMUSG00000063383	-3.05	-2.11	12.3	Zfp947
17	23175362	23175422	ENSMUSG00000002617	-3.05	-2.11	12.3	Zfp40
17	27908470	27908590	ENSMUSG00000024218	-3.05	-2.11	12.3	Taf11
17	32773713	32773983	ENSMUSG00000024298	-11.3	-9.95	12.3	Zfp871
17	35516096	35516334	ENSMUSG00000050410	-9.44	-8.17	12.3	Tcf19
17	85685111	85685202	ENSMUSG00000024134	-3.24	-2.29	12.3	Six2
18	37727680	37727741	ENSMUSG00000103897	-3.05	-2.11	12.3	Pcdhga8
18	37756926	37757017	ENSMUSG00000102742	-3.05	-2.11	12.3	Pcdhga11
18	37818130	37818191	ENSMUSG00000023036	-3.05	-2.11	12.3	Pcdhgc4
18	44828645	44828706	ENSMUSG00000034653	-3.05	-2.11	12.3	Ythdc2
18	76972033	76972243	ENSMUSG00000025421	-5.56	-4.46	12.3	Hdhd2
18	89130833	89130953	ENSMUSG00000023066	-3.05	-2.11	12.3	Rttn
18	6026340	6026520	ENSMUSG00000041225	-5.84	-4.72	12.3	Arhgap12
18	13845706	13845767	ENSMUSG00000024420	-3.05	-2.11	12.3	Zfp521
18	36505817	36506056	ENSMUSG00000024486	-12.7	-11.3	12.3	Hbegf
18	37756903	37757024	ENSMUSG00000097330	-3.05	-2.11	12.3	--
18	79086963	79087084	ENSMUSG00000024548	-3.05	-2.11	12.3	Setbp1
X	101321805	101321986	ENSMUSG00000031302	-3.05	-2.11	12.3	Nlgn3
X	95428244	95428334	ENSMUSG00000050332	-3.05	-2.11	12.3	Amer1
6	98929651	98929831	ENSMUSG00000030067	-5.37	-4.28	12.3	Foxp1
15	76459247	76459338	ENSMUSG00000034161	-3.05	-2.11	12.3	Scx
X	103481845	103482655	ENSMUSG00000086503	-97.3	-94.5	12.3	--
5	124724245	124724455	ENSMUSG00000038023	-16.5	-15	12.2	Atp6v0a2
5	38213743	38214014	ENSMUSG00000029127	-17.1	-15.5	12.2	Zbtb49
8	31128607	31129117	ENSMUSG00000039328	-63.6	-61.2	12.2	Rnf122
12	83734059	83734689	ENSMUSG00000019969	-81.4	-78.7	12.2	Psen1
1	36335819	36336389	ENSMUSG00000010453	-47.7	-45.5	12.1	Kansl3
3	86542693	86546947	ENSMUSG00000028080	-27.9	-26.1	12.1	Lrba
4	140131876	140133298	ENSMUSG00000085968	-14.3	-12.8	12.1	--
7	16497286	16497677	ENSMUSG00000058230	-63.7	-61.3	12.1	Arhgap35
9	58490075	58499750	ENSMUSG00000066607	-65.6	-63.2	12.1	Insyn1
15	82825294	82852082	ENSMUSG00000041852	-45.3	-43.1	12.1	Tcf20
18	4396138	4396615	ENSMUSG00000024234	-40.6	-38.6	12.1	Mtpap
18	47248337	47249476	ENSMUSG00000019647	-42.2	-40.1	12.1	Sema6a
19	56723586	56724062	ENSMUSG00000035283	-31.2	-29.4	12.1	Adrb1
9	111273170	111274039	ENSMUSG00000046785	-36.5	-34.6	12.1	Epm2aip1
2	156539859	156540339	ENSMUSG00000027624	-16.3	-14.8	12	Epb41l1
5	35612069	35612698	ENSMUSG00000029098	-16.3	-14.8	12	Acox3
5	14696984	14697254	ENSMUSG00000098233	-68.2	-65.8	12	--
7	5032831	5033068	ENSMUSG00000109129	-13.6	-12.1	12	Gm44973
7	100837101	100838001	ENSMUSG00000029461	-62.9	-60.5	12	Fam168a
7	139255142	139255679	ENSMUSG00000060260	-27.3	-25.5	12	Pwwp2b
9	21086303	21086513	ENSMUSG00000111497	-16.3	-14.8	12	Gm38431
9	21086312	21086523	ENSMUSG00000010205	-16.3	-14.8	12	Raver1
18	34770649	34771158	ENSMUSG00000034300	-76.8	-74.2	12	Fam53c
18	68254183	68254896	ENSMUSG00000024544	-18	-16.5	12	Ldlrad4
7	37479372	37480001	ENSMUSG00000043456	-63.3	-60.9	12	Zfp536
1	36520304	36520598	ENSMUSG00000001138	-12	-10.7	11.9	Cnnm3
1	97645421	97646202	ENSMUSG00000044768	-20.1	-18.5	11.9	D1Ertd622e
2	21827913	21828093	ENSMUSG00000045967	-5.61	-4.51	11.9	Gpr158
2	37793414	37793565	ENSMUSG00000035403	-5.61	-4.51	11.9	Crb2
4	89179706	89179916	ENSMUSG00000062937	-10.9	-9.53	11.9	Mtap
6	134717806	134718137	ENSMUSG00000030203	-22.6	-21	11.9	Dusp16
7	30162128	30162959	ENSMUSG00000037029	-72.8	-70.3	11.9	Zfp146
8	111134709	111135039	ENSMUSG00000033624	-27.7	-25.9	11.9	Pdpr
8	13256410	13256948	ENSMUSG00000038506	-64.6	-62.2	11.9	Dcun1d2
8	106009620	106009978	ENSMUSG00000045538	-18.6	-17	11.9	Ddx28
9	20643893	20644163	ENSMUSG00000084786	-31.5	-29.6	11.9	Ubl5
9	15006176	15007650	ENSMUSG00000031934	-21.6	-20	11.9	Panx1
9	96996054	96996234	ENSMUSG00000046997	-11.5	-10.2	11.9	Spsb4
11	31872479	31872779	ENSMUSG00000020300	-6.55	-5.41	11.9	Cpeb4
11	119028002	119029442	ENSMUSG00000025577	-77.7	-75.2	11.9	Cbx2
11	6106678	6107457	ENSMUSG00000053838	-37.8	-35.8	11.9	Nudcd3
11	76782079	76782260	ENSMUSG00000020841	-6.12	-5	11.9	Cpd
13	67540677	67540828	ENSMUSG00000095432	-5.61	-4.51	11.9	Zfp748
14	58109390	58109661	ENSMUSG00000021974	-18.2	-16.6	11.9	Fgf9
14	93887056	93887206	ENSMUSG00000055421	-5.61	-4.51	11.9	Pcdh9
15	12269552	12269823	ENSMUSG00000039458	-10.9	-9.53	11.9	Mtmr12
15	96401962	96402233	ENSMUSG00000033237	-33.9	-32	11.9	Arid2
15	101053175	101053683	ENSMUSG00000095440	-69.8	-67.3	11.9	Fignl2
16	20702569	20702689	ENSMUSG00000050821	-10.9	-9.53	11.9	Fam131a
16	33236967	33242144	ENSMUSG00000022807	-18.6	-17	11.9	Osbpl11
16	17528011	17528400	ENSMUSG00000022760	-62.8	-60.3	11.9	Thap7
16	46448475	46448865	ENSMUSG00000022656	-19.4	-17.9	11.9	Nectin3
17	3197632	3198321	ENSMUSG00000046201	-76.1	-73.5	11.9	Scaf8
17	45545296	45545506	ENSMUSG00000096847	-6.11	-4.99	11.9	Tmem151b
X	152612349	152612649	ENSMUSG00000045180	-20.3	-18.7	11.9	Shroom2
2	119963858	119964937	ENSMUSG00000033943	-37.7	-35.7	11.8	Mga
5	115342892	115343363	ENSMUSG00000029535	-39.1	-37.1	11.8	Triap1
6	113143791	113143971	ENSMUSG00000034269	-13.3	-11.9	11.8	Setd5
8	84661479	84662524	ENSMUSG00000053560	-57.4	-55.1	11.8	Ier2
11	98972668	98973956	ENSMUSG00000037992	-50.7	-48.5	11.8	Rara
13	95336413	95336949	ENSMUSG00000041995	-33.5	-31.6	11.8	Zbed3
15	101040422	101040993	ENSMUSG00000023033	-31.2	-29.4	11.8	Scn8a
18	31722400	31722761	ENSMUSG00000024260	-45.6	-43.5	11.8	Sap130
2	180661110	180661620	ENSMUSG00000038914	-30.8	-29	11.7	Dido1
3	53041766	53043380	ENSMUSG00000048332	-30.8	-29	11.7	Lhfp
4	72201673	72202119	ENSMUSG00000084910	-24.7	-23	11.7	--
4	132493469	132493679	ENSMUSG00000028893	-10.6	-9.31	11.7	Sesn2
7	44250614	44251781	ENSMUSG00000045411	-130	-127	11.7	2410002F23Rik
7	137196158	137196339	ENSMUSG00000010476	-18.3	-16.7	11.7	Ebf3
8	78732593	78732834	ENSMUSG00000031684	-10.6	-9.31	11.7	Slc10a7
8	121836332	121836721	ENSMUSG00000110631	-41	-39	11.7	--
8	84672781	84672931	ENSMUSG00000001910	-10.6	-9.31	11.7	Nacc1
11	6473492	6474451	ENSMUSG00000094483	-28.4	-26.5	11.7	Purb
11	77537840	77538021	ENSMUSG00000017291	-13.1	-11.7	11.7	Taok1
15	74750719	74751079	ENSMUSG00000022594	-19.6	-18	11.7	Lynx1
17	28174223	28174674	ENSMUSG00000038677	-33.7	-31.7	11.7	Scube3
2	93955874	93956553	ENSMUSG00000087006	-32.4	-30.5	11.7	Gm13889
8	84977946	84978214	ENSMUSG00000052837	-35.9	-34	11.7	Junb
13	60175361	60176528	ENSMUSG00000052957	-44.3	-42.2	11.7	Gas1
1	132449473	132449744	ENSMUSG00000042046	-28	-26.2	11.6	Dstyk
2	49279569	49279810	ENSMUSG00000036792	-19	-17.4	11.6	Mbd5
4	136009831	136010826	ENSMUSG00000028668	-47.4	-45.3	11.6	Eloa
5	140524587	140524977	ENSMUSG00000036599	-23	-21.3	11.6	Chst12
6	42317827	42318487	ENSMUSG00000029861	-44	-41.9	11.6	Fam131b
9	21353681	21354639	ENSMUSG00000057193	-28.4	-26.6	11.6	Slc44a2
13	117971628	117976289	ENSMUSG00000021730	-77.9	-75.3	11.6	Hcn1
16	30561510	30564653	ENSMUSG00000022538	-20.2	-18.6	11.6	Lsg1
18	80735759	80736090	ENSMUSG00000024566	-40.4	-38.4	11.6	Atp9b
15	101053157	101053697	ENSMUSG00000095440	-72.4	-69.9	11.6	Fignl2
1	15711462	15711553	ENSMUSG00000092083	-2.82	-1.91	11.5	Kcnb2
1	180333824	180334005	ENSMUSG00000038855	-3.88	-2.88	11.5	Itpkb
1	82290875	82291026	ENSMUSG00000055980	-5.39	-4.31	11.5	Irs1
1	160257469	160283965	ENSMUSG00000026721	-3	-2.06	11.5	Rabgap1l
2	92613582	92613940	ENSMUSG00000027221	-7.33	-6.15	11.5	Chst1
2	105676447	105676717	ENSMUSG00000027168	-17.8	-16.3	11.5	Pax6
2	151706646	151706825	ENSMUSG00000044364	-5.39	-4.31	11.5	Tmem74b
2	25579598	25579658	ENSMUSG00000029419	-2.82	-1.91	11.5	Ajm1
2	66186205	66188334	ENSMUSG00000034848	-2.82	-1.91	11.5	Ttc21b
2	93203885	93204006	ENSMUSG00000027217	-2.82	-1.91	11.5	Tspan18
3	5400415	5400506	ENSMUSG00000025255	-5.39	-4.31	11.5	Zfhx4
3	54317961	54318231	ENSMUSG00000027748	-16.4	-14.9	11.5	Trpc4
3	62459696	62460515	ENSMUSG00000036885	-34.9	-33	11.5	Arhgef26
3	98148204	98148265	ENSMUSG00000027878	-2.82	-1.91	11.5	Notch2
3	100925359	100925510	ENSMUSG00000033233	-8.24	-7.02	11.5	Trim45
3	45419534	45430918	ENSMUSG00000100799	-3.24	-2.29	11.5	--
3	63963992	63964351	ENSMUSG00000027822	-21.2	-19.6	11.5	Slc33a1
4	33502164	33502225	ENSMUSG00000028274	-2.82	-1.91	11.5	Rngtt
4	40472835	40473134	ENSMUSG00000046593	-5.17	-4.1	11.5	Tmem215
4	108338141	108338649	ENSMUSG00000048351	-18.2	-16.7	11.5	Coa7
4	139317038	139317098	ENSMUSG00000028743	-6.13	-5	11.5	Akr7a5
4	152125740	152125890	ENSMUSG00000028943	-3.66	-2.68	11.5	Espn
5	14679520	14679760	ENSMUSG00000061601	-6.39	-5.25	11.5	Pclo
5	65790260	65790381	ENSMUSG00000037795	-5.39	-4.31	11.5	N4bp2
5	24574350	24577437	ENSMUSG00000028953	-12.7	-11.3	11.5	Abcf2
5	106638270	106638451	ENSMUSG00000049606	-5.95	-4.83	11.5	Zfp644
5	118065621	118065682	ENSMUSG00000032867	-3.03	-2.1	11.5	Fbxw8
5	124424925	124424986	ENSMUSG00000038095	-2.82	-1.91	11.5	Sbno1
6	134898709	134898800	ENSMUSG00000100876	-2.82	-1.91	11.5	--
6	22356062	22356183	ENSMUSG00000029672	-2.82	-1.91	11.5	Fam3c
6	28417046	28417226	ENSMUSG00000029708	-3.4	-2.44	11.5	Gcc1
7	24903031	24903092	ENSMUSG00000040940	-2.82	-1.91	11.5	Arhgef1
7	144929085	144929205	ENSMUSG00000031072	-2.82	-1.91	11.5	Oraov1
7	6316677	6316768	ENSMUSG00000030443	-2.82	-1.91	11.5	Zfp583
7	12415362	12415512	ENSMUSG00000034071	-3.66	-2.68	11.5	Zfp551
7	115476923	115477014	ENSMUSG00000051910	-2.83	-1.91	11.5	Sox6
7	127384287	127384348	ENSMUSG00000030823	-2.82	-1.91	11.5	9130019O22Rik
7	127866824	127867125	ENSMUSG00000049728	-11.5	-10.1	11.5	Zfp668
8	3500516	3500667	ENSMUSG00000004567	-2.82	-1.91	11.5	Mcoln1
8	45795941	45796001	ENSMUSG00000031626	-2.82	-1.91	11.5	Sorbs2
8	8620187	8620876	ENSMUSG00000001300	-34.5	-32.6	11.5	Efnb2
8	9973263	9973413	ENSMUSG00000049717	-2.82	-1.91	11.5	Lig4
8	47710960	47711500	ENSMUSG00000038069	-22.2	-20.6	11.5	Cdkn2aip
8	83083415	83083772	ENSMUSG00000109876	-32.8	-30.9	11.5	--
9	73044913	73061027	ENSMUSG00000032202	-2.82	-1.91	11.5	Rab27a
9	4419269	4419450	ENSMUSG00000025892	-5.75	-4.64	11.5	Gria4
9	77431031	77431301	ENSMUSG00000032352	-25.1	-23.4	11.5	Lrrc1
9	95405392	95405782	ENSMUSG00000033350	-7.18	-6	11.5	Chst2
9	106651010	106651070	ENSMUSG00000023192	-3.03	-2.1	11.5	Grm2
10	18526356	18526417	ENSMUSG00000039835	-2.82	-1.91	11.5	Nhsl1
10	41478198	41478259	ENSMUSG00000019823	-2.82	-1.91	11.5	Mical1
10	94579154	94582299	ENSMUSG00000020023	-5.39	-4.31	11.5	Tmcc3
11	3685812	3686026	ENSMUSG00000034543	-5.49	-4.4	11.5	Morc2a
11	82783536	82783896	ENSMUSG00000020697	-37.5	-35.5	11.5	Lig3
11	97451757	97452326	ENSMUSG00000049807	-23.7	-22	11.5	Arhgap23
11	105922859	105923010	ENSMUSG00000053580	-3.08	-2.14	11.5	Tanc2
11	69804494	69804643	ENSMUSG00000089876	-2.82	-1.91	11.5	Tmem102
11	97022833	97023014	ENSMUSG00000087067	-4.3	-3.28	11.5	--
11	106330191	106330312	ENSMUSG00000001027	-2.82	-1.91	11.5	Scn4a
11	115800840	115801499	ENSMUSG00000034471	-29.7	-27.9	11.5	Caskin2
11	117868461	117868552	ENSMUSG00000017713	-2.82	-1.91	11.5	Tha1
11	120376719	120377170	ENSMUSG00000025384	-27	-25.2	11.5	Faap100
12	31712290	31712381	ENSMUSG00000044067	-3.66	-2.68	11.5	Gpr22
13	31807051	31807172	ENSMUSG00000050295	-3.03	-2.1	11.5	Foxc1
13	67843736	67843946	ENSMUSG00000058246	-7.73	-6.53	11.5	Gm10037
13	109953101	109953192	ENSMUSG00000021699	-2.82	-1.91	11.5	Pde4d
13	45557160	45557341	ENSMUSG00000046876	-5.39	-4.31	11.5	Atxn1
13	67268907	67268968	ENSMUSG00000055480	-2.82	-1.91	11.5	Zfp458
13	102734794	102735005	ENSMUSG00000034751	-9.79	-8.51	11.5	Mast4
13	119712576	119714128	ENSMUSG00000095930	-6.32	-5.19	11.5	Nim1k
14	36940421	36940482	ENSMUSG00000058690	-2.82	-1.91	11.5	Ccser2
14	67015161	67015222	ENSMUSG00000022052	-2.82	-1.91	11.5	Ppp2r2a
15	26309556	26309707	ENSMUSG00000022269	-3.03	-2.1	11.5	2022-03-11
15	77992076	77992197	ENSMUSG00000019146	-5.39	-4.31	11.5	Cacng2
16	31989500	31989711	ENSMUSG00000022772	-6.93	-5.77	11.5	Senp5
16	33973930	33973991	ENSMUSG00000061751	-2.82	-1.91	11.5	Kalrn
16	91615780	91615871	ENSMUSG00000039763	-5.39	-4.31	11.5	Dnajc28
17	64601514	64601575	ENSMUSG00000024085	-2.82	-1.91	11.5	Man2a1
17	17579151	17579212	ENSMUSG00000023845	-2.82	-1.91	11.5	Lnpep
18	11945059	11945150	ENSMUSG00000040957	-2.82	-1.91	11.5	Cables1
18	40258839	40258900	ENSMUSG00000051401	-2.82	-1.91	11.5	Kctd16
18	44417672	44417733	ENSMUSG00000024472	-2.82	-1.91	11.5	Dcp2
18	21128035	21128096	ENSMUSG00000042680	-2.82	-1.91	11.5	Garem1
18	37748834	37749164	ENSMUSG00000097330	-4.48	-3.45	11.5	--
18	70468088	70468149	ENSMUSG00000044906	-2.82	-1.91	11.5	4930503L19Rik
18	73971001	73971122	ENSMUSG00000024558	-2.82	-1.91	11.5	Mapk4
19	34573721	34574021	ENSMUSG00000045932	-5.39	-4.31	11.5	Ifit2
19	59299441	59299771	ENSMUSG00000074746	-13.6	-12.2	11.5	Pdzd8
X	16886325	16886386	ENSMUSG00000040138	-3.24	-2.29	11.5	Ndp
X	152346972	152347033	ENSMUSG00000056679	-2.82	-1.91	11.5	Gpr173
2	25578910	25578971	ENSMUSG00000029419	-3.24	-2.29	11.5	Ajm1
2	25579598	25579658	ENSMUSG00000029419	-2.82	-1.91	11.5	Ajm1
2	28450905	28451354	ENSMUSG00000035829	-32.2	-30.3	11.4	Ppp1r26
2	28686016	28687183	ENSMUSG00000026812	-30	-28.2	11.4	Tsc1
4	152283457	152283995	ENSMUSG00000042804	-49.6	-47.4	11.4	Gpr153
5	124463384	124463684	ENSMUSG00000029401	-39.6	-37.6	11.4	Rilpl2
6	145815169	145816501	ENSMUSG00000030259	-66.9	-64.4	11.4	Rassf8
6	91499292	91499681	ENSMUSG00000030094	-54.6	-52.4	11.4	Xpc
8	105856234	105856771	ENSMUSG00000036442	-54.2	-51.9	11.4	Thap11
10	105370168	105370468	ENSMUSG00000036019	-17.9	-16.3	11.4	Tmtc2
11	5716471	5717730	ENSMUSG00000049680	-34.6	-32.6	11.4	Urgcp
11	36008003	36008363	ENSMUSG00000049336	-47.9	-45.7	11.4	Tenm2
15	81821347	81823902	ENSMUSG00000022389	-27.7	-25.9	11.4	Tef
17	55652130	55652520	ENSMUSG00000024174	-19	-17.5	11.4	Pot1b
19	45552721	45552930	ENSMUSG00000025218	-15.2	-13.7	11.4	Poll
2	121300935	121301415	ENSMUSG00000027254	-22.3	-20.7	11.3	Map1a
2	152707263	152707623	ENSMUSG00000019188	-27.8	-26	11.3	H13
3	55135528	55135857	ENSMUSG00000036580	-24.2	-22.5	11.3	Spg20
3	58652261	58652980	ENSMUSG00000105021	-26.6	-24.8	11.3	--
3	63963989	63964346	ENSMUSG00000097724	-19.9	-18.3	11.3	--
3	102013007	102013577	ENSMUSG00000048540	-89.4	-86.7	11.3	Nhlh2
3	123114109	123114530	ENSMUSG00000050315	-45.8	-43.6	11.3	Synpo2
4	123246944	123247095	ENSMUSG00000032744	-7.69	-6.5	11.3	Heyl
4	138895467	138896746	ENSMUSG00000041161	-16.7	-15.2	11.3	Otud3
5	123454577	123454818	ENSMUSG00000038342	-17.4	-15.9	11.3	Mlxip
6	40254836	40255015	ENSMUSG00000057716	-10.2	-8.89	11.3	Tmem178b
7	49857485	49857695	ENSMUSG00000030505	-7.69	-6.5	11.3	Prmt3
7	66714327	66714567	ENSMUSG00000053091	-10.2	-8.89	11.3	Lins1
7	80589560	80589890	ENSMUSG00000030527	-34.9	-33	11.3	Crtc3
7	92658531	92658862	ENSMUSG00000041328	-60.3	-57.9	11.3	Pcf11
7	118134815	118135737	ENSMUSG00000030655	-62.8	-60.4	11.3	Smg1
8	66468348	66468827	ENSMUSG00000036469	-62.7	-60.3	11.3	2022-03-01
8	48228160	48229029	ENSMUSG00000031561	-34.6	-32.7	11.3	Tenm3
9	72619163	72619853	ENSMUSG00000037674	-24.6	-22.9	11.3	Rfx7
9	45860265	45860682	ENSMUSG00000111128	-80.3	-77.7	11.3	--
9	58877022	58878112	ENSMUSG00000032340	-107	-104	11.3	Neo1
9	67220835	67223983	ENSMUSG00000052698	-49.8	-47.5	11.3	Tln2
10	19002498	19002739	ENSMUSG00000019850	-7.69	-6.5	11.3	Tnfaip3
11	50170930	50171470	ENSMUSG00000036644	-81.8	-79.2	11.3	Tbc1d9b
11	120011445	120012255	ENSMUSG00000025375	-22.2	-20.6	11.3	Aatk
12	3501787	3502028	ENSMUSG00000037486	-14.9	-13.5	11.3	Asxl2
12	69372721	69373665	ENSMUSG00000044147	-84.5	-81.9	11.3	Arf6
12	72541426	72541755	ENSMUSG00000034501	-10.2	-8.89	11.3	Pcnx4
13	14186854	14187724	ENSMUSG00000039219	-34.2	-32.3	11.3	Arid4b
14	105892989	105893705	ENSMUSG00000022114	-63.3	-60.9	11.3	Spry2
15	60822762	60823092	ENSMUSG00000072568	-14.5	-13.1	11.3	Fam84b
16	97950402	97950851	ENSMUSG00000046962	-31.3	-29.4	11.3	Zbtb21
17	25826301	25826511	ENSMUSG00000025737	-10.2	-8.89	11.3	Wdr24
18	37437107	37437584	ENSMUSG00000043458	-11.7	-10.3	11.3	Pcdhb12
18	54897307	54898087	ENSMUSG00000052713	-106	-103	11.3	Zfp608
1	25093849	25094270	ENSMUSG00000033569	-81	-78.3	11.2	Adgrb3
2	153316454	153317504	ENSMUSG00000027475	-26	-24.3	11.2	Kif3b
3	16203923	16204972	ENSMUSG00000047213	-57.8	-55.4	11.2	Ythdf3
3	87977722	87978532	ENSMUSG00000004891	-55.4	-53.1	11.2	Nes
3	88729195	88729674	ENSMUSG00000028057	-29.5	-27.7	11.2	Rit1
6	124809701	124809968	ENSMUSG00000038451	-43.3	-41.2	11.2	Spsb2
7	45523870	45524141	ENSMUSG00000040435	-26.3	-24.5	11.2	Ppp1r15a
13	112738058	112738299	ENSMUSG00000047789	-19.7	-18.1	11.2	Slc38a9
16	3748754	3749862	ENSMUSG00000022529	-72.3	-69.8	11.2	Zfp263
18	31888577	31892996	ENSMUSG00000024400	-50.5	-48.2	11.2	Wdr33
18	36791125	36791724	ENSMUSG00000019143	-44.8	-42.7	11.2	Hars2
19	29143251	29143489	ENSMUSG00000024785	-12.5	-11.1	11.2	Rcl1
19	45005368	45005901	ENSMUSG00000025208	-78	-75.4	11.2	Mrpl43
1	105991394	105991575	ENSMUSG00000038866	-5.17	-4.1	11.1	Zcchc2
1	191778652	191778953	ENSMUSG00000026623	-25	-23.2	11.1	Lpgat1
1	161088853	161089034	ENSMUSG00000026705	-5.96	-4.84	11.1	Klhl20
1	172322718	172323049	ENSMUSG00000038026	-9.97	-8.68	11.1	Kcnj9
2	127258776	127259314	ENSMUSG00000034850	-41.7	-39.7	11.1	Tmem127
2	37428756	37428906	ENSMUSG00000066798	-5.17	-4.1	11.1	Zbtb6
2	130636379	130636590	ENSMUSG00000037703	-19.4	-17.9	11.1	Lzts3
3	116618742	116619269	ENSMUSG00000027959	-5.17	-4.1	11.1	Sass6
3	9699308	9699698	ENSMUSG00000027508	-29.3	-27.5	11.1	Pag1
3	62468851	62468972	ENSMUSG00000027770	-5.17	-4.1	11.1	Dhx36
4	42871642	42871822	ENSMUSG00000050141	-5.33	-4.24	11.1	Fam205c
4	117288734	117288944	ENSMUSG00000028677	-9.97	-8.68	11.1	Rnf220
5	76915159	76915399	ENSMUSG00000029246	-11.6	-10.2	11.1	Ppat
5	124111137	124111316	ENSMUSG00000085433	-5.17	-4.1	11.1	--
7	80081115	80081416	ENSMUSG00000048897	-16.1	-14.6	11.1	Zfp710
7	4148934	4149174	ENSMUSG00000043432	-31.4	-29.6	11.1	Leng9
9	60737729	60738087	ENSMUSG00000034839	-9.97	-8.68	11.1	Larp6
11	60864451	60865102	ENSMUSG00000043284	-125	-122	11.1	Tmem11
11	75453189	75453549	ENSMUSG00000045374	-8.98	-7.72	11.1	Wdr81
12	78226378	78226619	ENSMUSG00000047454	-18.8	-17.2	11.1	Gphn
12	86518933	86519174	ENSMUSG00000021255	-14.2	-12.8	11.1	Esrrb
12	71317620	71317831	ENSMUSG00000087109	-9.33	-8.07	11.1	--
12	101040247	101040668	ENSMUSG00000041846	-54.7	-52.4	11.1	Ppp4r3a
14	24135267	24135567	ENSMUSG00000021782	-56.5	-54.2	11.1	Dlg5
14	31701645	31705294	ENSMUSG00000014496	-35.7	-33.7	11.1	Ankrd28
15	39112864	39118764	ENSMUSG00000022300	-10.3	-8.95	11.1	Dcaf13
15	76892094	76892245	ENSMUSG00000033669	-5.17	-4.1	11.1	Zfp7
15	78940658	78940897	ENSMUSG00000033099	-32.7	-30.8	11.1	Nol12
16	19769288	19769558	ENSMUSG00000022686	-5.17	-4.1	11.1	B3gnt5
16	30513770	30514639	ENSMUSG00000022537	-14.4	-13	11.1	Tmem44
17	32978252	32978639	ENSMUSG00000053600	-9.97	-8.68	11.1	Zfp472
19	8804494	8804614	ENSMUSG00000071661	-5.17	-4.1	11.1	Zbtb3
19	45007391	45007631	ENSMUSG00000025209	-16.8	-15.3	11.1	Twnk
X	13156102	13156703	ENSMUSG00000031010	-57.8	-55.5	11.1	Usp9x
X	101320779	101321049	ENSMUSG00000096056	-17	-15.5	11.1	--
1	136627001	136627450	ENSMUSG00000041483	-16.1	-14.6	11	Zfp281
5	107909572	107910020	ENSMUSG00000029270	-36.1	-34.1	11	Fam69a
5	134490521	134490792	ENSMUSG00000063146	-14.5	-13.1	11	Clip2
7	28459121	28459451	ENSMUSG00000030600	-37.6	-35.6	11	Lrfn1
7	25202097	25202456	ENSMUSG00000054499	-27.6	-25.8	11	Dedd2
8	4255620	4255950	ENSMUSG00000011837	-14.5	-13.1	11	Snapc2
8	4209691	4210259	ENSMUSG00000064125	-40.5	-38.4	11	Prr36
8	69742324	69742475	ENSMUSG00000092260	-7.48	-6.29	11	Zfp963
13	17772304	17772934	ENSMUSG00000041297	-30.5	-28.7	11	Cdk13
13	51702564	51702805	ENSMUSG00000021451	-17.1	-15.5	11	Sema4d
14	104465203	104466212	ENSMUSG00000048349	-89.7	-87	11	Pou4f1
16	57571866	57572497	ENSMUSG00000043336	-15.8	-14.3	11	Filip1l
18	24283170	24285259	ENSMUSG00000000420	-77.7	-75.1	11	Galnt1
18	46167336	46167636	ENSMUSG00000033949	-15.1	-13.7	11	Trim36
2	3225838	3226197	ENSMUSG00000050530	-13.7	-12.3	10.9	Fam171a1
2	158008418	158008599	ENSMUSG00000027650	-9.76	-8.47	10.9	Tti1
2	165379802	165380432	ENSMUSG00000017667	-39.4	-37.3	10.9	Zfp334
3	95059692	95059812	ENSMUSG00000028126	-12.1	-10.8	10.9	Pip5k1a
5	114122837	114123167	ENSMUSG00000029592	-9.76	-8.47	10.9	Usp30
5	146847023	146847609	ENSMUSG00000029641	-23.2	-21.5	10.9	Rasl11a
6	32792683	32794301	ENSMUSG00000053768	-48	-45.8	10.9	Chchd3
9	107852929	107853349	ENSMUSG00000032582	-65.1	-62.6	10.9	Rbm6
11	120610086	120610536	ENSMUSG00000025137	-34.5	-32.5	10.9	Pcyt2
12	102744611	102745297	ENSMUSG00000046675	-48.4	-46.2	10.9	Tmem251
16	11074970	11075450	ENSMUSG00000022498	-14.1	-12.7	10.9	Txndc11
17	66337251	66337491	ENSMUSG00000052105	-62.3	-59.9	10.9	Mtcl1
17	80398150	80398420	ENSMUSG00000024241	-11.3	-9.99	10.9	Sos1
18	34904728	34904968	ENSMUSG00000024360	-21.5	-19.9	10.9	Etf1
8	84977265	84977681	ENSMUSG00000052837	-10.6	-9.28	10.9	Junb
17	15820721	15821081	ENSMUSG00000048027	-32.7	-30.8	10.9	Rgmb
1	171503782	171504111	ENSMUSG00000091993	-34.5	-32.5	10.8	--
4	121147887	121148607	ENSMUSG00000049878	-28.9	-27.1	10.8	Rlf
9	20643898	20644138	ENSMUSG00000066892	-31.7	-29.8	10.8	Fbxl12
11	117714433	117723535	ENSMUSG00000025571	-72.8	-70.3	10.8	Tnrc6c
12	21325214	21325544	ENSMUSG00000052593	-31.2	-29.3	10.8	Adam17
13	99414784	99415263	ENSMUSG00000041632	-43.4	-41.3	10.8	Mrps27
16	33496194	33496434	ENSMUSG00000022811	-21	-19.4	10.8	Zfp148
19	31083830	31084521	ENSMUSG00000053536	-78.4	-75.8	10.8	Cstf2t
1	58445510	58445601	ENSMUSG00000026036	-2.83	-1.91	10.7	Nif3l1
1	70728842	70729022	ENSMUSG00000045648	-4.96	-3.89	10.7	Vwc2l
1	90214837	90214898	ENSMUSG00000044337	-2.6	-1.7	10.7	Ackr3
1	132331692	132332022	ENSMUSG00000009772	-11.1	-9.79	10.7	Nuak2
1	64794199	64794679	ENSMUSG00000051344	-11.5	-10.2	10.7	Plekhm3
1	64938446	64938506	ENSMUSG00000051344	-2.6	-1.7	10.7	Plekhm3
1	105284576	105284757	ENSMUSG00000047496	-5.72	-4.61	10.7	Rnf152
1	105566930	105567081	ENSMUSG00000056536	-3.24	-2.29	10.7	Pign
1	170174776	170174957	ENSMUSG00000026670	-4.91	-3.84	10.7	Uap1
1	183135757	183135817	ENSMUSG00000030768	-2.6	-1.7	10.7	Disp1
1	191171491	191171612	ENSMUSG00000026628	-2.6	-1.7	10.7	Atf3
1	194819818	194819998	ENSMUSG00000103597	-4.96	-3.89	10.7	--
2	26458473	26458829	ENSMUSG00000086714	-64.8	-62.4	10.7	--
2	26628486	26628546	ENSMUSG00000036186	-2.6	-1.7	10.7	Fam69b
2	32761765	32762244	ENSMUSG00000009563	-29.6	-27.7	10.7	Tor2a
2	71840660	71840829	ENSMUSG00000027111	-2.6	-1.7	10.7	Itga6
2	72256425	72256516	ENSMUSG00000049044	-2.83	-1.91	10.7	Rapgef4
2	83664441	83664622	ENSMUSG00000027091	-20.8	-19.2	10.7	Zc3h15
2	109723808	109724048	ENSMUSG00000048482	-3.66	-2.68	10.7	Bdnf
2	131954996	131955057	ENSMUSG00000098754	-2.6	-1.7	10.7	Prn
2	131954970	131955060	ENSMUSG00000027338	-2.6	-1.7	10.7	Prnd
2	180980464	180981627	ENSMUSG00000027575	-91.4	-88.6	10.7	Arfgap1
2	26891898	26892168	ENSMUSG00000036160	-7.2	-6.02	10.7	Surf6
2	65461310	65461550	ENSMUSG00000057182	-7.73	-6.53	10.7	Scn3a
2	66484006	66484067	ENSMUSG00000075316	-2.6	-1.7	10.7	Scn9a
2	112632193	112635322	ENSMUSG00000057378	-2.6	-1.7	10.7	Ryr3
2	114196572	114196692	ENSMUSG00000040321	-3.15	-2.21	10.7	Zfp770
2	129284982	129285132	ENSMUSG00000048327	-3.24	-2.29	10.7	Ckap2l
3	134242002	134242243	ENSMUSG00000044365	-6.97	-5.8	10.7	Cxxc4
3	141828565	141828806	ENSMUSG00000059921	-9.54	-8.26	10.7	Unc5c
3	52104925	52105016	ENSMUSG00000061143	-2.6	-1.7	10.7	Maml3
3	108679532	108679682	ENSMUSG00000027883	-7.26	-6.08	10.7	Gpsm2
3	109781418	109781569	ENSMUSG00000059857	-4.96	-3.89	10.7	Ntng1
4	45804364	45804455	ENSMUSG00000035561	-2.6	-1.7	10.7	Aldh1b1
4	57893066	57893337	ENSMUSG00000038729	-7.53	-6.34	10.7	Akap2
4	119872889	119872950	ENSMUSG00000028634	-2.6	-1.7	10.7	Hivep3
4	120133997	120134118	ENSMUSG00000028634	-2.6	-1.7	10.7	Hivep3
4	129143523	129143583	ENSMUSG00000001334	-3.03	-2.1	10.7	Fndc5
4	148055773	148056134	ENSMUSG00000029009	-53.4	-51.1	10.7	Mthfr
4	32805291	32805531	ENSMUSG00000040183	-3.24	-2.29	10.7	Ankrd6
4	32805799	32805860	ENSMUSG00000040183	-2.6	-1.7	10.7	Ankrd6
4	64016876	64017624	ENSMUSG00000028364	-31.2	-29.4	10.7	Tnc
4	108605209	108605330	ENSMUSG00000084968	-2.6	-1.7	10.7	--
4	127047602	127047873	ENSMUSG00000043872	-5.72	-4.61	10.7	Zmym1
4	138720113	138720174	ENSMUSG00000043621	-2.6	-1.7	10.7	Ubxn10
4	139737390	139737451	ENSMUSG00000028736	-2.6	-1.7	10.7	Pax7
5	14241081	14252496	ENSMUSG00000063531	-3.24	-2.29	10.7	Sema3e
5	24685981	24689399	ENSMUSG00000028954	-2.6	-1.7	10.7	Nub1
5	37149320	37149381	ENSMUSG00000063646	-2.6	-1.7	10.7	Jakmip1
5	44227094	44243249	ENSMUSG00000104784	-5.49	-4.4	10.7	--
5	119883960	119884080	ENSMUSG00000018263	-2.6	-1.7	10.7	Tbx5
5	138195026	138195383	ENSMUSG00000049285	-13.8	-12.3	10.7	Mblac1
5	25692239	25692360	ENSMUSG00000028933	-3.03	-2.1	10.7	Xrcc2
5	64803343	64803403	ENSMUSG00000097640	-2.6	-1.7	10.7	--
5	112389716	112391465	ENSMUSG00000029348	-15.9	-14.4	10.7	Asphd2
5	112911110	112911171	ENSMUSG00000042249	-2.97	-2.04	10.7	Grk3
5	140327850	140328498	ENSMUSG00000029557	-20.1	-18.5	10.7	Mrm2
6	47866818	47866909	ENSMUSG00000062519	-4.96	-3.89	10.7	Zfp398
6	48528984	48529285	ENSMUSG00000107476	-4.11	-3.1	10.7	--
6	48532225	48532646	ENSMUSG00000107476	-7.81	-6.61	10.7	--
6	113314661	113316688	ENSMUSG00000001632	-15.8	-14.3	10.7	Brpf1
6	85348323	85348443	ENSMUSG00000051343	-2.62	-1.72	10.7	Rab11fip5
7	12885025	12885085	ENSMUSG00000060397	-2.6	-1.7	10.7	Zfp128
7	43573310	43573490	ENSMUSG00000056592	-9.54	-8.26	10.7	Zfp658
7	64268515	64268696	ENSMUSG00000030523	-4.96	-3.89	10.7	Trpm1
7	64268905	64269176	ENSMUSG00000030523	-18.1	-16.6	10.7	Trpm1
7	64400498	64412095	ENSMUSG00000033429	-15.7	-14.3	10.7	Mcee
7	75865906	75866086	ENSMUSG00000055652	-14.1	-12.6	10.7	Klhl25
7	97305502	97305833	ENSMUSG00000004508	-9.34	-8.07	10.7	Gab2
7	126696524	126696792	ENSMUSG00000047721	-24.8	-23.1	10.7	Bola2
7	131984572	131984633	ENSMUSG00000040125	-2.6	-1.7	10.7	Gpr26
7	6317486	6317547	ENSMUSG00000030443	-2.6	-1.7	10.7	Zfp583
7	7203459	7203520	ENSMUSG00000066838	-2.88	-1.96	10.7	Zfp772
7	13261455	13261516	ENSMUSG00000070814	-3.03	-2.1	10.7	Zswim9
7	27963194	27963315	ENSMUSG00000063047	-2.6	-1.7	10.7	Zfp780b
7	55979231	55979530	ENSMUSG00000047037	-19	-17.4	10.7	Nipa1
7	123279636	123279996	ENSMUSG00000030766	-17.4	-15.8	10.7	Arhgap17
7	132238140	132238290	ENSMUSG00000030930	-3.24	-2.29	10.7	Chst15
8	33387191	33387282	ENSMUSG00000049184	-4.96	-3.89	10.7	Purg
8	54077665	54077755	ENSMUSG00000031520	-2.6	-1.7	10.7	Vegfc
8	9207580	9208030	ENSMUSG00000079157	-20.6	-19	10.7	Fam155a
8	69611005	69611155	ENSMUSG00000060427	-6.34	-5.2	10.7	Zfp868
9	21091874	21127914	ENSMUSG00000086016	-9.24	-7.97	10.7	--
9	21276366	21276756	ENSMUSG00000002820	-5.8	-4.69	10.7	Atg4d
9	22424414	22424475	ENSMUSG00000036411	-2.6	-1.7	10.7	9530077C05Rik
9	45860266	45861106	ENSMUSG00000032086	-78.5	-75.9	10.7	Bace1
9	45906496	45906886	ENSMUSG00000035382	-7.79	-6.59	10.7	Pcsk7
9	8100756	8100877	ENSMUSG00000040729	-3.24	-2.29	10.7	Cep126
9	56926996	56927116	ENSMUSG00000032733	-2.88	-1.96	10.7	Snx33
9	123853031	123853122	ENSMUSG00000060509	-2.6	-1.7	10.7	Xcr1
10	14132306	14132366	ENSMUSG00000015501	-2.6	-1.7	10.7	Hivep2
10	39821508	39821688	ENSMUSG00000019841	-5.75	-4.64	10.7	Rev3l
10	56115928	56116226	ENSMUSG00000047669	-5.48	-4.39	10.7	Msl3l2
10	61648551	61651589	ENSMUSG00000020089	-9.24	-7.98	10.7	Ppa1
10	69904457	69920465	ENSMUSG00000069601	-3.86	-2.86	10.7	Ank3
10	80608235	80608295	ENSMUSG00000035370	-2.6	-1.7	10.7	Gm49322
10	105845426	105847354	ENSMUSG00000019897	-35.4	-33.5	10.7	Ccdc59
10	5227784	5227905	ENSMUSG00000096054	-2.6	-1.7	10.7	Syne1
10	42196450	42196989	ENSMUSG00000048756	-32.5	-30.6	10.7	Foxo3
10	62187853	62188093	ENSMUSG00000037031	-30.4	-28.6	10.7	Tspan15
10	78585518	78585609	ENSMUSG00000032714	-2.71	-1.8	10.7	Syde1
10	94864723	94864783	ENSMUSG00000074785	-2.83	-1.91	10.7	Plxnc1
11	24164943	24165093	ENSMUSG00000000861	-2.83	-1.91	10.7	Bcl11a
11	51580273	51581050	ENSMUSG00000063564	-39.9	-37.9	10.7	Col23a1
11	61069307	61069398	ENSMUSG00000042529	-2.6	-1.7	10.7	Kcnj12
11	73040760	73041357	ENSMUSG00000020785	-20.6	-19	10.7	Camkk1
11	76212791	76213061	ENSMUSG00000069808	-18.3	-16.8	10.7	Fam57a
11	86485195	86486099	ENSMUSG00000020521	-2.6	-1.7	10.7	Rnft1
11	97022828	97023007	ENSMUSG00000038560	-4.3	-3.28	10.7	Sp6
11	101435195	101435494	ENSMUSG00000035007	-32	-30.1	10.7	Rundc1
11	120236757	120236967	ENSMUSG00000039741	-20	-18.4	10.7	Bahcc1
11	53565188	53565277	ENSMUSG00000086851	-2.6	-1.7	10.7	--
11	99234914	99235005	ENSMUSG00000035849	-2.6	-1.7	10.7	Krt222
12	76576790	76576851	ENSMUSG00000052609	-2.6	-1.7	10.7	Plekhg3
12	80758734	80758825	ENSMUSG00000097575	-2.6	-1.7	10.7	--
12	84138996	84139057	ENSMUSG00000042523	-2.6	-1.7	10.7	Dnal1
12	87201835	87201955	ENSMUSG00000090812	-2.6	-1.7	10.7	Samd15
12	111261693	111262024	ENSMUSG00000021277	-20.5	-18.8	10.7	Traf3
12	24831082	24831172	ENSMUSG00000113621	-2.6	-1.7	10.7	--
12	80758739	80758830	ENSMUSG00000062961	-2.6	-1.7	10.7	Ccdc177
12	84173308	84173369	ENSMUSG00000042507	-2.62	-1.72	10.7	Elmsan1
12	87279683	87279803	ENSMUSG00000050671	-2.6	-1.7	10.7	Ism2
12	110976455	110976575	ENSMUSG00000037904	-2.6	-1.7	10.7	Ankrd9
13	51408728	51408789	ENSMUSG00000067586	-4.96	-3.89	10.7	S1pr3
13	83738397	83739057	ENSMUSG00000050334	-29.4	-27.6	10.7	--
13	48489500	48489681	ENSMUSG00000050954	-3.24	-2.29	10.7	Zfp169
13	48491026	48491147	ENSMUSG00000050954	-2.6	-1.7	10.7	Zfp169
13	67442243	67442334	ENSMUSG00000069206	-2.6	-1.7	10.7	Zfp874a
14	31228111	31228172	ENSMUSG00000021904	-2.6	-1.7	10.7	Sema3g
14	75344036	75344097	ENSMUSG00000022000	-3.8	-2.8	10.7	Zc3h13
14	117975079	117975199	ENSMUSG00000058571	-2.6	-1.7	10.7	Gpc6
14	27486699	27490111	ENSMUSG00000046753	-22.8	-21.1	10.7	Ccdc66
14	48870344	48870491	ENSMUSG00000115398	-2.6	-1.7	10.7	--
15	75623598	75624916	ENSMUSG00000047003	-64.9	-62.4	10.7	Zfp41
15	76950439	76950770	ENSMUSG00000063236	-20.2	-18.6	10.7	1110038F14Rik
15	58181177	58181477	ENSMUSG00000022358	-16	-14.5	10.7	Fbxo32
15	76080714	76080834	ENSMUSG00000002524	-2.6	-1.7	10.7	Puf60
16	17531321	17531462	ENSMUSG00000116898	-2.6	-1.7	10.7	--
16	38089000	38089151	ENSMUSG00000022812	-4.96	-3.89	10.7	Gsk3b
17	3198109	3228492	ENSMUSG00000116858	-28	-26.2	10.7	--
17	45515974	45516214	ENSMUSG00000023938	-7.03	-5.86	10.7	Aars2
17	85060897	85063854	ENSMUSG00000024131	-18.3	-16.7	10.7	Slc3a1
17	24169551	24169672	ENSMUSG00000024121	-6.12	-5	10.7	Atp6v0c
17	33666617	33668749	ENSMUSG00000059208	-14.4	-12.9	10.7	Hnrnpm
17	70973966	70974086	ENSMUSG00000034868	-11	-9.65	10.7	Myl12b
18	9214229	9214290	ENSMUSG00000036904	-2.6	-1.7	10.7	Fzd8
18	37423536	37423597	ENSMUSG00000051486	-2.6	-1.7	10.7	Pcdhb11
18	50130174	50142465	ENSMUSG00000024507	-10.3	-9.02	10.7	Hsd17b4
18	75820267	75820358	ENSMUSG00000044646	-2.6	-1.7	10.7	Zbtb7c
18	38202890	38203400	ENSMUSG00000051375	-9.94	-8.65	10.7	Pcdh1
19	3815245	3816295	ENSMUSG00000045098	-66.6	-64.2	10.7	Kmt5b
19	44836735	44836855	ENSMUSG00000004231	-2.6	-1.7	10.7	Pax2
19	56722756	56722846	ENSMUSG00000035283	-2.6	-1.7	10.7	Adrb1
19	10456349	10456409	ENSMUSG00000090291	-2.6	-1.7	10.7	Lrrc10b
X	112633334	112633395	ENSMUSG00000025529	-2.6	-1.7	10.7	Zfp711
X	140468926	140472113	ENSMUSG00000031432	-3.3	-2.34	10.7	Prps1
X	164432446	164432567	ENSMUSG00000031381	-2.6	-1.7	10.7	Piga
X	136861527	136861587	ENSMUSG00000043463	-2.6	-1.7	10.7	Rab9b
1	3670991	3671111	ENSMUSG00000051951	-2.83	-1.91	10.7	Xkr4
7	37568962	37569830	ENSMUSG00000043456	-34.9	-33	10.7	Zfp536
7	78577642	78577703	ENSMUSG00000059146	-2.6	-1.7	10.7	Ntrk3
8	86843895	86844046	ENSMUSG00000031652	-4.13	-3.11	10.7	N4bp1
1	6249513	6250114	ENSMUSG00000025907	-46.8	-44.6	10.6	Rb1cc1
1	59763968	59764149	ENSMUSG00000067336	-9.32	-8.05	10.6	Bmpr2
2	33453540	33453899	ENSMUSG00000026788	-24.6	-22.9	10.6	Zbtb43
2	119660011	119660570	ENSMUSG00000027305	-21.5	-19.8	10.6	Ndufaf1
2	180042074	180042165	ENSMUSG00000027566	-9.32	-8.05	10.6	Psma7
3	107331876	107332087	ENSMUSG00000048109	-11.6	-10.2	10.6	Rbm15
4	12145838	12146137	ENSMUSG00000046667	-16.1	-14.6	10.6	Rbm12b1
4	136291815	136292085	ENSMUSG00000051351	-9.44	-8.17	10.6	Zfp46
4	88720169	88720945	ENSMUSG00000070923	-75.2	-72.7	10.6	Klhl9
5	107506965	107507205	ENSMUSG00000111375	-11.6	-10.2	10.6	Btbd8
5	128602840	128603050	ENSMUSG00000081683	-13.8	-12.4	10.6	Fzd10
5	66300799	66301070	ENSMUSG00000029207	-9.86	-8.58	10.6	Apbb2
7	27489897	27490077	ENSMUSG00000008384	-9.32	-8.05	10.6	Sertad1
7	39567073	39567703	ENSMUSG00000108621	-27.7	-25.9	10.6	--
7	43590057	43591137	ENSMUSG00000030469	-9.32	-8.05	10.6	Zfp719
7	75872815	75873175	ENSMUSG00000055652	-32.7	-30.8	10.6	Klhl25
7	127881957	127883035	ENSMUSG00000049739	-45.3	-43.1	10.6	Zfp646
7	105772182	105772363	ENSMUSG00000036862	-9.32	-8.05	10.6	Dchs1
8	47192413	47192923	ENSMUSG00000038143	-20.4	-18.8	10.6	Stox2
11	43705294	43705684	ENSMUSG00000044950	-56.2	-53.9	10.6	Pwwp2a
12	110855348	110855619	ENSMUSG00000021271	-22.6	-21	10.6	Zfp839
12	100130472	100130802	ENSMUSG00000021179	-19.6	-18	10.6	Nrde2
16	32251897	32252316	ENSMUSG00000022787	-9.32	-8.05	10.6	Wdr53
16	17153989	17154199	ENSMUSG00000038965	-28.3	-26.4	10.6	Ube2l3
17	87134505	87135522	ENSMUSG00000037104	-40.6	-38.6	10.6	Socs5
1	136627509	136627989	ENSMUSG00000041483	-47.5	-45.3	10.5	Zfp281
1	135440846	135441627	ENSMUSG00000009418	-36.9	-35	10.5	Nav1
2	27762091	27762450	ENSMUSG00000015846	-22.6	-20.9	10.5	Rxra
2	152687240	152687623	ENSMUSG00000042814	-59.4	-57	10.5	Mcts2
2	26458471	26458832	ENSMUSG00000026923	-64.7	-62.2	10.5	Notch1
2	34822564	34823104	ENSMUSG00000035949	-74.1	-71.5	10.5	Fbxw2
2	180259225	180259495	ENSMUSG00000038990	-26.2	-24.5	10.5	Cables2
3	87931598	87932106	ENSMUSG00000048039	-20.2	-18.6	10.5	Isg20l2
4	106654419	106654628	ENSMUSG00000043572	-7.18	-6	10.5	Pars2
4	124856376	124857066	ENSMUSG00000042763	-85.3	-82.7	10.5	Maneal
5	116442027	116442327	ENSMUSG00000063919	-32.5	-30.6	10.5	Srrm4
6	86367010	86369138	ENSMUSG00000057497	-109	-107	10.5	Fam136a
8	123506530	123509102	ENSMUSG00000031970	-26.1	-24.4	10.5	Dbndd1
9	20668318	20668648	ENSMUSG00000032172	-52.9	-50.7	10.5	Olfm2
10	128502424	128502961	ENSMUSG00000097353	-34.5	-32.5	10.5	--
11	46440687	46441406	ENSMUSG00000020397	-22	-20.3	10.5	Med7
15	89372195	89372766	ENSMUSG00000008690	-44.3	-42.1	10.5	Ncaph2
15	101210907	101211386	ENSMUSG00000000532	-103	-100	10.5	Acvr1b
15	80260643	80261054	ENSMUSG00000051518	-50.4	-48.2	10.5	Rps19bp1
16	76293967	76294597	ENSMUSG00000048490	-15.9	-14.4	10.5	Nrip1
17	30217709	30218608	ENSMUSG00000062202	-50.4	-48.1	10.5	Btbd9
17	33334663	33335143	ENSMUSG00000003929	-24	-22.3	10.5	Zfp81
18	15062188	15062458	ENSMUSG00000036225	-17.9	-16.4	10.5	Kctd1
1	34589181	34589570	ENSMUSG00000045174	-5.16	-4.08	10.4	Amer3
1	34590077	34590257	ENSMUSG00000045174	-4.74	-3.69	10.4	Amer3
1	55238494	55238735	ENSMUSG00000046994	-7.6	-6.4	10.4	Mars2
1	132332231	132332620	ENSMUSG00000009772	-9.1	-7.84	10.4	Nuak2
2	156079453	156096914	ENSMUSG00000098950	-33.7	-31.8	10.4	Gm28036
3	68494711	68494951	ENSMUSG00000102422	-14.3	-12.9	10.4	Iqschfp
3	88647662	88648052	ENSMUSG00000028059	-14.8	-13.3	10.4	Arhgef2
4	99258440	99258800	ENSMUSG00000028550	-29.5	-27.7	10.4	Atg4c
4	132459565	132459834	ENSMUSG00000066042	-4.9	-3.84	10.4	Med18
5	24183384	24183565	ENSMUSG00000048439	-9.1	-7.84	10.4	Nupl2
5	105811758	105812089	ENSMUSG00000046079	-10.4	-9.11	10.4	Lrrc8d
5	137290254	137290791	ENSMUSG00000023328	-56.4	-54.1	10.4	Ache
5	138755412	138755592	ENSMUSG00000025854	-4.74	-3.69	10.4	Fam20c
5	27766215	27772618	ENSMUSG00000002221	-22.2	-20.5	10.4	Paxip1
5	31047630	31047690	ENSMUSG00000006641	-4.74	-3.69	10.4	Slc5a6
5	118192709	118192979	ENSMUSG00000032850	-26.2	-24.5	10.4	Rnft2
5	139472495	139472824	ENSMUSG00000053581	-20.3	-18.7	10.4	Zfand2a
6	28418419	28418898	ENSMUSG00000029708	-75.6	-73	10.4	Gcc1
7	105758851	105759091	ENSMUSG00000036862	-13.4	-12	10.4	Dchs1
7	132759534	132760103	ENSMUSG00000030956	-22.1	-20.5	10.4	Fam53b
8	47668611	47669329	ENSMUSG00000063049	-56.8	-54.5	10.4	Ing2
9	15258316	15258406	ENSMUSG00000031937	-4.74	-3.69	10.4	Vstm5
9	101100609	101100910	ENSMUSG00000066415	-25.3	-23.5	10.4	Msl2
9	99520246	99520516	ENSMUSG00000032468	-52.4	-50.1	10.4	Armc8
10	30833700	30833760	ENSMUSG00000019789	-4.74	-3.69	10.4	Hey2
10	68098297	68098478	ENSMUSG00000019947	-4.74	-3.69	10.4	Arid5b
10	121784642	121784853	ENSMUSG00000020121	-6.73	-5.57	10.4	Srgap1
11	63889533	63889684	ENSMUSG00000070407	-6.14	-5.01	10.4	Hs3st3b1
11	113780450	113780601	ENSMUSG00000041592	-4.74	-3.69	10.4	Sdk2
12	67221829	67221890	ENSMUSG00000034912	-4.74	-3.69	10.4	Mdga2
13	21363677	21364007	ENSMUSG00000036721	-15.7	-14.2	10.4	Zscan12
14	36879008	36879577	ENSMUSG00000058690	-24	-22.3	10.4	Ccser2
15	38690505	38691667	ENSMUSG00000022295	-17.3	-15.7	10.4	Atp6v1c1
15	39437101	39437342	ENSMUSG00000037386	-8.76	-7.51	10.4	Rims2
15	39681587	39682486	ENSMUSG00000037386	-48.1	-45.9	10.4	Rims2
16	30600856	30601036	ENSMUSG00000046546	-7.34	-6.16	10.4	Fam43a
16	91227456	91227755	ENSMUSG00000039830	-6.05	-4.92	10.4	Olig2
9	108567651	108567712	ENSMUSG00000103103	-4.74	-3.69	10.4	--
15	75980673	75980881	ENSMUSG00000098176	-22.8	-21.2	10.4	Ccdc166
1	44166869	44167678	ENSMUSG00000026048	-37.5	-35.5	10.3	Ercc5
1	171503773	171504395	ENSMUSG00000060244	-31.9	-30	10.3	Alyref2
2	20881389	20881749	ENSMUSG00000036591	-20.7	-19.1	10.3	Arhgap21
2	160365130	160365637	ENSMUSG00000074622	-16.9	-15.4	10.3	Mafb
3	152276427	152276698	ENSMUSG00000054942	-32.3	-30.4	10.3	Miga1
4	118363101	118363402	ENSMUSG00000033253	-58	-55.7	10.3	Szt2
7	46427822	46428362	ENSMUSG00000058975	-30.3	-28.4	10.3	Kcnc1
7	19724174	19724653	ENSMUSG00000062300	-55.3	-53	10.3	Nectin2
8	109940326	109941196	ENSMUSG00000031732	-72	-69.4	10.3	Phlpp2
10	9760251	9762761	ENSMUSG00000019790	-82	-79.4	10.3	Stxbp5
11	71751702	71759835	ENSMUSG00000020811	-60.7	-58.3	10.3	Wscd1
11	76212798	76213068	ENSMUSG00000017286	-17.7	-16.2	10.3	Glod4
15	12349380	12349858	ENSMUSG00000022200	-40.8	-38.7	10.3	Golph3
15	76891285	76891796	ENSMUSG00000033669	-25.1	-23.4	10.3	Zfp7
17	87986474	87988189	ENSMUSG00000005370	-22.4	-20.8	10.3	Msh6
1	132434290	132449354	ENSMUSG00000042046	-8.89	-7.64	10.2	Dstyk
1	171342181	171342511	ENSMUSG00000013997	-16.6	-15.1	10.2	Nit1
2	83879238	83880614	ENSMUSG00000048388	-76.8	-74.2	10.2	Fam171b
3	41613186	41614412	ENSMUSG00000025764	-25.1	-23.3	10.2	Jade1
4	153373967	153374177	ENSMUSG00000039546	-11.8	-10.4	10.2	Ajap1
5	102892098	102897459	ENSMUSG00000057315	-66.5	-64	10.2	Arhgap24
6	4642039	4642458	ENSMUSG00000015189	-54.9	-52.6	10.2	Casd1
6	86439144	86439414	ENSMUSG00000046679	-16.9	-15.4	10.2	C87436
7	44357097	44357727	ENSMUSG00000038738	-52.7	-50.5	10.2	Shank1
7	89510006	89510714	ENSMUSG00000030623	-70.9	-68.4	10.2	--
8	36586678	36593290	ENSMUSG00000031523	-9.82	-8.53	10.2	Dlc1
9	56490302	56495618	ENSMUSG00000032329	-63.3	-60.8	10.2	Hmg20a
9	69378862	69379373	ENSMUSG00000032238	-44.1	-42	10.2	Rora
10	61580766	61581064	ENSMUSG00000037151	-13.2	-11.8	10.2	Lrrc20
11	101666832	101667362	ENSMUSG00000034936	-48.1	-45.9	10.2	Arl4d
11	78542384	78542743	ENSMUSG00000037278	-18.2	-16.6	10.2	Tmem97
11	82812499	82812680	ENSMUSG00000020696	-6.82	-5.66	10.2	Rffl
12	85301517	85303477	ENSMUSG00000034290	-33.9	-32	10.2	Nek9
14	20736070	20736669	ENSMUSG00000021820	-98.9	-96.1	10.2	Camk2g
16	17483913	17484213	ENSMUSG00000006134	-23.3	-21.7	10.2	Crkl
16	38526450	38526719	ENSMUSG00000034064	-18.8	-17.2	10.2	Poglut1
17	71598127	71598576	ENSMUSG00000085492	-18.1	-16.6	10.2	--
18	36625063	36632132	ENSMUSG00000024483	-17.8	-16.3	10.2	Ankhd1
19	21856263	21856444	ENSMUSG00000024754	-9.53	-8.26	10.2	Tmem2
19	46502036	46502455	ENSMUSG00000025034	-36.3	-34.4	10.2	Trim8
19	29809744	29810104	ENSMUSG00000074909	-19.5	-17.9	10.2	Ranbp6
1	153221468	153223698	ENSMUSG00000026478	-32.2	-30.3	10.1	Lamc1
4	120267910	120268178	ENSMUSG00000052135	-13.6	-12.2	10.1	Foxo6
5	103833537	103834286	ENSMUSG00000029313	-54.3	-52	10.1	Aff1
6	93678091	93680807	ENSMUSG00000045095	-205	-202	10.1	Magi1
7	67736355	67736565	ENSMUSG00000030554	-17.1	-15.5	10.1	Synm
7	119857564	119858045	ENSMUSG00000048787	-30.2	-28.4	10.1	Dcun1d3
8	116957512	116958052	ENSMUSG00000047388	-18.5	-17	10.1	Atmin
8	123267951	123268221	ENSMUSG00000001065	-21.1	-19.5	10.1	Zfp276
8	36570119	36570390	ENSMUSG00000031523	-39.5	-37.5	10.1	Dlc1
8	84211602	84212319	ENSMUSG00000035671	-47.1	-44.9	10.1	Zswim4
8	102633803	102634013	ENSMUSG00000031673	-12.8	-11.4	10.1	Cdh11
10	76470919	76471250	ENSMUSG00000001150	-45.9	-43.7	10.1	Mcm3ap
11	71025438	71025796	ENSMUSG00000040599	-31.4	-29.6	10.1	Mis12
11	3646521	3647091	ENSMUSG00000056579	-31.2	-29.4	10.1	--
12	28747036	28747367	ENSMUSG00000020628	-93.3	-90.6	10.1	Trappc12
12	112908774	112909343	ENSMUSG00000002799	-75.7	-73.2	10.1	Jag2
13	111487422	111487781	ENSMUSG00000032745	-23	-21.3	10.1	Gpbp1
15	82141097	82141337	ENSMUSG00000068114	-15.1	-13.6	10.1	Ccdc134
17	56259176	56259895	ENSMUSG00000043683	-54	-51.7	10.1	Fem1a
X	53642636	53643055	ENSMUSG00000067925	-50.2	-48	10.1	Rtl8a
1	43075273	43092392	ENSMUSG00000070939	-31.2	-29.4	10	Tgfbrap1
1	119417561	119418071	ENSMUSG00000037035	-25.3	-23.6	10	Inhbb
1	181177450	181180445	ENSMUSG00000038733	-84.9	-82.2	10	Wdr26
8	121601155	121601485	ENSMUSG00000061410	-38.5	-36.4	10	Zcchc14
9	44335517	44336077	ENSMUSG00000049932	-110	-107	10	H2afx
12	81663764	81664034	ENSMUSG00000042734	-23.1	-21.5	10	Ttc9
12	105492285	105492765	ENSMUSG00000094910	-31.1	-29.2	10	D430019H16Rik
14	120503632	120503932	ENSMUSG00000051615	-25.2	-23.4	10	Rap2a
19	29025662	29026292	ENSMUSG00000024780	-41.3	-39.2	10	Cdc37l1
X	94636753	94637349	ENSMUSG00000071723	-48.3	-46.1	10	Gspt2
1	72301187	72301667	ENSMUSG00000026188	-14	-12.6	9.98	Tmem169
1	81241747	81241838	ENSMUSG00000054976	-2.38	-1.51	9.98	Nyap2
1	132205470	132205561	ENSMUSG00000079330	-2.38	-1.51	9.98	Lemd1
1	172370291	172370471	ENSMUSG00000044708	-2.97	-2.04	9.98	Kcnj10
1	183388980	183389070	ENSMUSG00000072258	-2.38	-1.51	9.98	Taf1a
1	191025797	191025977	ENSMUSG00000097845	-5.31	-4.22	9.98	--
1	105284127	105284188	ENSMUSG00000047496	-2.38	-1.51	9.98	Rnf152
1	155097402	155097463	ENSMUSG00000056708	-2.38	-1.51	9.98	Ier5
1	191170744	191170864	ENSMUSG00000026628	-2.38	-1.51	9.98	Atf3
2	25579590	25579651	ENSMUSG00000097872	-3.15	-2.21	9.98	--
2	65701766	65701947	ENSMUSG00000075318	-5.51	-4.42	9.98	Scn2a
2	82257870	82258081	ENSMUSG00000070866	-8.67	-7.43	9.98	Zfp804a
2	152754201	152755129	ENSMUSG00000009876	-4.61	-3.56	9.98	Cox4i2
2	156521835	156522315	ENSMUSG00000027624	-16.3	-14.8	9.98	Epb41l1
2	156701135	156701585	ENSMUSG00000061689	-18.4	-16.9	9.98	Dlgap4
2	57108261	57108589	ENSMUSG00000026826	-5.72	-4.61	9.98	Nr4a2
2	101717096	101717306	ENSMUSG00000032841	-5.13	-4.06	9.98	Prr5l
2	155278242	155278573	ENSMUSG00000038383	-14.8	-13.3	9.98	Pigu
2	160781815	160781936	ENSMUSG00000035877	-4.52	-3.48	9.98	Zhx3
2	168634437	168634767	ENSMUSG00000027546	-41.9	-39.9	9.98	Atp9a
3	65553130	65553250	ENSMUSG00000034640	-4.52	-3.48	9.98	Tiparp
3	129633171	129633231	ENSMUSG00000041220	-2.38	-1.51	9.98	Elovl6
3	80688159	80689117	ENSMUSG00000033981	-37.9	-35.9	9.98	Gria2
3	142793057	142793208	ENSMUSG00000004591	-5.11	-4.03	9.98	Pkn2
4	21993332	21993722	ENSMUSG00000028246	-38.8	-36.8	9.98	Faxc
4	28963964	28964324	ENSMUSG00000028289	-5.31	-4.23	9.98	Epha7
4	32800582	32800793	ENSMUSG00000045854	-9.77	-8.48	9.98	Lyrm2
4	40732954	40733015	ENSMUSG00000028410	-2.38	-1.51	9.98	Dnaja1
4	43176831	43177522	ENSMUSG00000028456	-54.4	-52.1	9.98	Unc13b
4	49529582	49529732	ENSMUSG00000039634	-4.52	-3.48	9.98	Zfp189
4	57893083	57893354	ENSMUSG00000089945	-6.71	-5.56	9.98	Pakap
4	63136021	63136231	ENSMUSG00000028358	-7.13	-5.96	9.98	Zfp618
4	133591408	133591705	ENSMUSG00000028848	-29.1	-27.2	9.98	Gpn2
4	156110070	156113965	ENSMUSG00000059939	-5.31	-4.22	9.98	9430015G10Rik
4	35708383	35708504	ENSMUSG00000045083	-2.38	-1.51	9.98	Lingo2
4	120921341	120922024	ENSMUSG00000028629	-15.3	-13.9	9.98	Exo5
4	126490827	126491218	ENSMUSG00000042500	-44.5	-42.3	9.98	Ago4
4	132225702	132227981	ENSMUSG00000028901	-20.4	-18.8	9.98	Gmeb1
5	34965442	34965982	ENSMUSG00000029101	-20	-18.4	9.98	Rgs12
5	114910917	114911067	ENSMUSG00000029561	-3.03	-2.1	9.98	Oasl2
5	130839445	130839565	ENSMUSG00000060371	-3.53	-2.56	9.98	Caln1
5	4756146	4756237	ENSMUSG00000044674	-2.38	-1.51	9.98	Fzd1
5	24351483	24351574	ENSMUSG00000038319	-2.38	-1.51	9.98	Kcnh2
6	29957134	29957254	ENSMUSG00000039629	-4.52	-3.48	9.98	Strip2
6	56778774	56779193	ENSMUSG00000059486	-31	-29.2	9.98	Kbtbd2
7	27742286	27748579	ENSMUSG00000037640	-14	-12.6	9.98	Zfp60
7	67225762	67226751	ENSMUSG00000043831	-42.6	-40.6	9.98	Lysmd4
7	67647559	67647620	ENSMUSG00000030555	-2.38	-1.51	9.98	Ttc23
7	79559253	79559374	ENSMUSG00000108616	-2.38	-1.51	9.98	--
7	80346691	80350547	ENSMUSG00000030532	-68.9	-66.4	9.98	Hddc3
7	110629310	110629371	ENSMUSG00000030790	-2.83	-1.91	9.98	Adm
7	29161339	29161579	ENSMUSG00000037239	-8.67	-7.43	9.98	Spred3
7	92661637	92661878	ENSMUSG00000041328	-12.8	-11.4	9.98	Pcf11
7	126862000	126862347	ENSMUSG00000030689	-2.38	-1.51	9.98	Ino80e
8	19493230	19493290	ENSMUSG00000081094	-6.61	-5.46	9.98	--
8	121598010	121598131	ENSMUSG00000031812	-7.2	-6.02	9.98	Map1lc3b
9	85844647	85844768	ENSMUSG00000035274	-4.24	-3.22	9.98	Tpbg
9	85844827	85845037	ENSMUSG00000035274	-8.67	-7.43	9.98	Tpbg
9	36732874	36734406	ENSMUSG00000032116	-7.18	-6	9.98	Stt3a
9	108112984	108113195	ENSMUSG00000032589	-8.67	-7.43	9.98	Bsn
9	120050997	120051147	ENSMUSG00000052336	-2.83	-1.91	9.98	Cx3cr1
10	123738933	123739054	ENSMUSG00000044071	-3.24	-2.29	9.98	Fam19a2
10	128716001	128716121	ENSMUSG00000025359	-2.42	-1.54	9.98	Pmel
10	4427312	4427493	ENSMUSG00000019763	-6.55	-5.4	9.98	Rmnd1
10	33949292	33949383	ENSMUSG00000039531	-2.62	-1.72	9.98	Zup1
11	103068463	103068643	ENSMUSG00000020936	-9.02	-7.76	9.98	Nmt1
11	12237475	12237566	ENSMUSG00000020173	-4.52	-3.48	9.98	Cobl
11	53649846	53649937	ENSMUSG00000020380	-2.62	-1.72	9.98	Rad50
11	87085850	87086089	ENSMUSG00000020495	-8.67	-7.43	9.98	Smg8
11	94291183	94291394	ENSMUSG00000020863	-24.9	-23.2	9.98	Luc7l3
11	98155300	98155811	ENSMUSG00000018160	-13.5	-12.1	9.98	Med1
11	103394932	103395173	ENSMUSG00000034247	-12.8	-11.4	9.98	Plekhm1
11	115894526	115894707	ENSMUSG00000020752	-12.1	-10.8	9.98	Recql5
12	17174732	17174913	ENSMUSG00000051726	-6.61	-5.46	9.98	Kcnf1
12	54180505	54180655	ENSMUSG00000035105	-2.62	-1.72	9.98	Egln3
12	116255878	116262591	ENSMUSG00000042050	-27.7	-25.9	9.98	Wdr60
13	67705488	67705609	ENSMUSG00000071281	-2.38	-1.51	9.98	Zfp65
13	119766175	119768723	ENSMUSG00000094870	-34.2	-32.2	9.98	Zfp131
14	65358563	65358744	ENSMUSG00000034522	-4.42	-3.39	9.98	Zfp395
14	12473575	12473636	ENSMUSG00000054423	-4.07	-3.06	9.98	Cadps
14	118983081	118983345	ENSMUSG00000115220	-12.9	-11.5	9.98	--
15	34133647	34136702	ENSMUSG00000022255	-4.89	-3.83	9.98	Mtdh
15	85061604	85061844	ENSMUSG00000022434	-8.67	-7.43	9.98	Fam118a
15	33686567	33686747	ENSMUSG00000038984	-7.73	-6.53	9.98	Tspyl5
15	36241250	36242000	ENSMUSG00000022280	-87.3	-84.6	9.98	Rnf19a
15	55031117	55034215	ENSMUSG00000037343	-2.38	-1.51	9.98	Taf2
15	99470883	99470944	ENSMUSG00000037525	-4.52	-3.48	9.98	Bcdin3d
16	38004743	38004954	ENSMUSG00000046961	-4.08	-3.07	9.98	Gpr156
16	87719780	87719960	ENSMUSG00000025612	-8.67	-7.43	9.98	Bach1
[truncated: 9,601 more rows]

## Sheet: p0 retina
Chromosome	PeakStart	PeakEnd	PeakFoldEnrichment	-LOG10(pvalue)	-LOG10(qvalue)	Gene_ENSEMBL	Gene_Symbol	Gene_Region
14	115284381	115284474	61.4166	478.531	472.154	ENSMUSG00000022112	Gpc5	Intron2
8	91441401	91441496	36.499	214.543	208.924	ENSMUSG00000055932	Fto	Intron3
13	53233453	53233619	30.615	190.573	185.328	ENSMUSG00000021464	Ror2	Intron1
4	112007380	112007472	26.8814	159.582	154.513	ENSMUSG00000089773	Skint1	LastIntron
1	187179303	187179395	22.4012	124.001	119.171	ENSMUSG00000026611	Spata17	Intron4
3	54694608	54694701	21.2811	115.415	110.655	ENSMUSG00000027751	Supt20	Intron1
16	17483942	17484286	21.1819	133.728	128.658	ENSMUSG00000006134	Crkl	UTR3
7	143375795	143375887	20.5344	109.767	105.055	ENSMUSG00000009545	Kcnq1	LastIntron
8	14896718	14896951	20.4253	117.283	112.342	ENSMUSG00000026317	Cln8	LastExon
1	59639728	59639877	20.0308	140.824	135.701	ENSMUSG00000026021	Sumo1	UTR3
9	100495404	100495654	19.8016	98.0855	93.3194	ENSMUSG00000032475	Nck1	UTR3
3	144570705	144570800	19.0473	141.682	136.553	ENSMUSG00000037072	Selenof	LastExon
12	53959648	53959741	19.041	98.6606	94.0475	ENSMUSG00000021010	Npas3	Intron6
6	28830691	28831238	19.0253	92.5371	87.8334	ENSMUSG00000049939	Lrrc4	LastExon
6	28830691	28831238	19.0253	92.5371	87.8334	ENSMUSG00000001424	Snd1	LastIntron
2	72206763	72206855	18.6677	95.9257	91.3371	ENSMUSG00000049044	Rapgef4	Intron16
16	96467695	96467790	18.2526	82.7878	78.1938	ENSMUSG00000117081	Igsf5	Intron7
16	96467695	96467790	18.2526	82.7878	78.1938	ENSMUSG00000090223	Pcp4	UTR5
X	135993807	135993952	18.249	87.0614	82.419	ENSMUSG00000048040	Arxes2	UTR5
4	112911722	112911814	17.5476	87.8258	83.3151	ENSMUSG00000087194	Skint6	Intron27
7	25686246	25686530	17.526	125.586	120.583	ENSMUSG00000063439	B9d2	LastExon
16	23487266	23487358	17.3609	86.4917	81.9942	ENSMUSG00000022887	Masp1	Intron5
2	38643839	38643934	17.2836	88.6952	84.0332	ENSMUSG00000026750	Psmb7	Exon1
2	156307441	156307826	16.8002	88.9774	84.3118	ENSMUSG00000038116	Phf20	UTR3
11	58346046	58346335	16.7226	185.342	179.92	ENSMUSG00000013646	Sh3bp5l	LastExon
1	86142309	86142404	16.5187	81.6053	77.0255	ENSMUSG00000094638	Gm21972	Intron2
15	38295692	38296115	16.3812	71.4598	67.0042	ENSMUSG00000037465	Klf10	UTR3
15	89171066	89171161	16.0161	85.0438	80.4242	ENSMUSG00000036606	Plxnb2	UTR5
4	124856420	124857206	15.6874	113.546	108.636	ENSMUSG00000042763	Maneal	UTR3
10	59897470	59897887	15.6371	118.145	113.199	ENSMUSG00000020109	Dnajb12	UTR3
11	94992486	94992868	15.5895	387.875	381.417	ENSMUSG00000038976	Ppp1r9b	Exon1
8	9207545	9207968	15.5874	65.4874	61.1103	ENSMUSG00000079157	Fam155a	UTR3
2	114011494	114011694	15.5319	68.5176	64.1018	ENSMUSG00000068615	Gjd2	LastExon
9	20652103	20652198	15.3824	64.1958	59.8376	ENSMUSG00000032171	Pin1	UTR5
12	110793153	110794198	15.2915	106.875	102.023	ENSMUSG00000037957	Wdr20	LastExon
3	9280774	9281167	15.2871	102.907	98.0932	ENSMUSG00000069114	Zbtb10	LastExon
15	78940479	78940855	15.0516	81.3382	76.7614	ENSMUSG00000033099	Nol12	LastExon
8	78505467	78505583	14.982	191.63	186.163	ENSMUSG00000037070	Rbmxl1	UTR3
11	105241567	105241662	14.9724	61.6307	57.3078	ENSMUSG00000020694	Tlk2	Exon9
13	78189368	78189774	14.8627	182.642	177.237	ENSMUSG00000069171	Nr2f1	UTR3
1	179753419	179754022	14.823	132.618	127.556	ENSMUSG00000026491	Ahctf1	Exon33
14	65077689	65077844	14.7674	60.3574	56.052	ENSMUSG00000021978	Extl3	Exon3
10	3963411	3964328	14.7674	60.3574	56.052	ENSMUSG00000040624	Plekhg1	LastExon
10	58479883	58480424	14.6994	108.423	103.557	ENSMUSG00000003226	Ranbp2	Exon20
10	94199035	94199131	14.4652	102.924	98.2727	ENSMUSG00000020022	Ndufa12	UTR5
8	8660531	8660685	14.4425	88.1726	83.5164	ENSMUSG00000001300	Efnb2	Exon1
8	95095885	95096021	14.3819	126.583	121.57	ENSMUSG00000031787	Katnb1	UTR3
10	128252706	128252854	14.3573	57.8295	53.5623	ENSMUSG00000039994	Timeless	LastExon
5	137290336	137290730	14.1523	56.5751	52.328	ENSMUSG00000023328	Ache	Exon1
19	43736503	43736755	14.1523	56.5751	52.328	ENSMUSG00000040018	Cox15	UTR3
9	66946087	66946180	14.1081	91.802	87.2529	ENSMUSG00000036781	Rps27l	UTR5
12	84172823	84172992	13.9473	56.5751	52.328	ENSMUSG00000042507	Elmsan1	Exon2
11	26386990	26387224	13.9136	68.7264	64.3071	ENSMUSG00000004018	Fancl	UTR5
4	126716300	126716611	13.7531	56.0951	51.8553	ENSMUSG00000042477	Tfap2e	UTR3
12	21324260	21324475	13.7102	87.0553	82.413	ENSMUSG00000052593	Adam17	UTR3
X	136033368	136033487	13.5902	66.2908	61.9037	ENSMUSG00000048355	Arxes1	UTR5
2	83879969	83880554	13.5882	105.486	100.647	ENSMUSG00000048388	Fam171b	LastExon
17	31114240	31114404	13.5689	71.4122	66.9573	ENSMUSG00000024030	Abcg1	LastExon
17	80274893	80275440	13.4862	55.428	51.1982	ENSMUSG00000035051	Dhx57	Exon5
8	9770174	9770494	13.3323	52.8515	48.6621	ENSMUSG00000079157	Fam155a	Exon1
3	85653766	85653919	13.2667	63.8765	59.5218	ENSMUSG00000028085	Gatb	LastExon
3	85653766	85653919	13.2667	63.8765	59.5218	ENSMUSG00000102805	Gm37240	Intron3
17	24280926	24281018	13.254	58.4134	54.2523	ENSMUSG00000035435	Abca17	Intron24
3	69575644	69575817	13.1648	67.2212	62.8224	ENSMUSG00000043300	B3galnt1	LastExon
5	129862796	129862979	13.1038	81.1327	76.5589	ENSMUSG00000025538	Sumf2	UTR3
9	64311703	64311961	12.9825	79.9605	75.4009	ENSMUSG00000032396	Dis3l	Exon12
16	13147952	13148141	12.9433	61.4839	57.1632	ENSMUSG00000022545	Ercc4	UTR3
11	51580067	51580968	12.8942	134.407	129.332	ENSMUSG00000063564	Col23a1	UTR3
11	114791307	114791562	12.8583	333.959	327.717	ENSMUSG00000000202	Btbd17	LastExon
4	137656095	137656422	12.8338	88.0541	83.3993	ENSMUSG00000043411	Usp48	LastExon
7	35278495	35278899	12.8119	97.3204	92.563	ENSMUSG00000063808	Gpatch1	LastIntron
9	101074860	101075339	12.7799	97.1769	92.421	ENSMUSG00000066415	Msl2	UTR5
17	47601298	47601641	12.7442	53.5256	49.3259	ENSMUSG00000023988	Bysl	UTR3
5	73020729	73020888	12.7399	77.6286	73.0977	ENSMUSG00000070733	Fryl	UTR3
17	85985344	85985479	12.6933	50.5503	46.3972	ENSMUSG00000024135	Srbd1	LastExon
17	87991817	87992112	12.6737	157.696	152.445	ENSMUSG00000005371	Fbxo11	UTR3
3	95944258	95944361	12.6625	192.562	187.09	ENSMUSG00000015749	Anp32e	Exon6
15	74706026	74706201	12.6224	57.6986	53.4335	ENSMUSG00000046380	Jrk	LastExon
3	116024169	116024355	12.6208	51.0766	46.9151	ENSMUSG00000027963	Extl2	Exon3
5	137784530	137784830	12.6163	191.44	185.974	ENSMUSG00000029726	Mepce	Exon1
15	80212059	80212567	12.5839	58.2996	54.0259	ENSMUSG00000042428	Mgat3	LastExon
6	29125322	29125472	12.5122	47.9828	43.8721	ENSMUSG00000029701	Rbm28	UTR3
8	111669514	111669832	12.5048	75.0784	70.5781	ENSMUSG00000055835	Zfp1	LastExon
9	110320893	110321242	12.4347	52.9336	48.7429	ENSMUSG00000054836	Elp6	LastExon
4	6365667	6365900	12.3207	52.4134	48.335	ENSMUSG00000028249	Sdcbp	Intron1
17	34934918	34935189	12.305	74.6066	70.1125	ENSMUSG00000007038	Neu1	LastExon
16	8855832	8856075	12.2963	56.7666	52.5164	ENSMUSG00000022507	1810013L24Rik	LastExon
1	36106062	36106271	12.2963	56.7666	52.5164	ENSMUSG00000045216	Hs6st1	UTR3
10	9760443	9760912	12.2904	55.3477	51.1191	ENSMUSG00000019790	Stxbp5	UTR3
7	41467650	41467764	12.2647	98.609	93.8376	ENSMUSG00000092592	Gm20449	Intron1
3	108644469	108644699	12.213	106.77	101.919	ENSMUSG00000040389	Wdr47	LastExon
18	31804079	31804243	12.2032	64.8813	60.5132	ENSMUSG00000024400	Wdr33	UTR5
19	41830987	41831539	12.1869	81.1643	76.5899	ENSMUSG00000067199	Frat1	LastExon
7	78775404	78775613	12.1346	55.6018	51.3696	ENSMUSG00000030612	Mrpl46	UTR3
2	151494260	151494364	12.1312	172.133	166.791	ENSMUSG00000027455	Nsfl1c	Exon1
19	40588306	40588401	12.1022	45.5917	41.5203	ENSMUSG00000025007	Aldh18a1	UTR5
14	84532994	84533153	12.1022	45.5917	41.5203	ENSMUSG00000035566	Pcdh17	LastExon
5	122850203	122850299	12.1022	45.5917	41.5203	ENSMUSG00000029474	Rnf34	UTR5
1	64597206	64597580	12.0386	47.5043	43.4023	ENSMUSG00000025958	Creb1	LastExon
4	53761189	53761500	12.0386	47.5043	43.4023	ENSMUSG00000028414	Fktn	LastExon
14	50944500	50944595	12.0386	47.5043	43.4023	ENSMUSG00000021871	Gm49342	UTR5
14	50944500	50944595	12.0386	47.5043	43.4023	ENSMUSG00000115338	Pnp	UTR5
9	75218054	75218474	11.9712	78.899	74.3518	ENSMUSG00000034593	Myo5a	UTR3
10	130280156	130280270	11.9712	78.899	74.3518	ENSMUSG00000048015	Neurod4	UTR5
2	30472674	30473280	11.971	66.8802	62.4853	ENSMUSG00000089762	Ier5l	UTR3
2	59843572	59844073	11.9628	49.3749	45.241	ENSMUSG00000035168	Tanc1	LastExon
19	45007844	45008342	11.959	62.0003	57.6718	ENSMUSG00000025209	Twnk	Exon1
9	13246915	13247021	11.8971	44.4074	40.3563	ENSMUSG00000079084	Ccdc82	UTR5
17	78753076	78753211	11.8971	44.4074	40.3563	ENSMUSG00000039414	Heatr5b	LastExon
15	6796283	6796814	11.8971	44.4074	40.3563	ENSMUSG00000050310	Rictor	UTR3
X	152728160	152728259	11.8971	44.4074	40.3563	ENSMUSG00000045180	Shroom2	Intron1
14	52197132	52197256	11.8971	44.4074	40.3563	ENSMUSG00000035726	Supt16	Exon1
10	42186045	42186286	11.8895	102.295	97.4872	ENSMUSG00000048756	Foxo3	UTR3
9	108848769	108849079	11.8723	78.4976	73.9566	ENSMUSG00000023473	Celsr3	Exon34
10	77606224	77606342	11.8707	110.472	105.589	ENSMUSG00000112241	Gm49325	UTR5
10	77606224	77606342	11.8707	110.472	105.589	ENSMUSG00000020265	Sumo3	UTR5
7	67225877	67226655	11.8453	50.6436	46.4889	ENSMUSG00000043831	Lysmd4	UTR3
2	138283758	138283970	11.8445	46.3277	42.2443	ENSMUSG00000062098	Btbd3	LastExon
14	65075629	65076134	11.8236	94.1192	89.3974	ENSMUSG00000021978	Extl3	Exon3
8	70352883	70353007	11.8112	53.2903	49.0947	ENSMUSG00000058301	Upf1	Exon1
1	158245810	158246241	11.7695	69.604	65.1733	ENSMUSG00000004031	Brinp2	UTR3
12	51999513	51999730	11.7671	52.4798	48.2965	ENSMUSG00000020956	Dtd2	UTR3
X	52315950	52316042	11.7606	48.8909	44.8656	ENSMUSG00000055653	Gpc3	Intron6
7	56230917	56231356	11.7159	116.44	111.506	ENSMUSG00000030451	Herc2	LastExon
15	99205563	99205660	11.6921	43.2307	39.2002	ENSMUSG00000051934	Spats2	Exon10
15	99470160	99470560	11.6487	60.3057	56.0017	ENSMUSG00000037525	Bcdin3d	LastExon
15	41820312	41820457	11.6478	75.5314	71.0255	ENSMUSG00000022307	Oxr1	Exon9
4	132225537	132225933	11.6472	91.8941	87.1974	ENSMUSG00000028901	Gmeb1	UTR3
4	21848035	21848140	11.6462	137.701	132.6	ENSMUSG00000028248	Pnisr	UTR5
5	124835443	124835629	11.5305	65.3338	60.9596	ENSMUSG00000037979	Ccdc92	UTR3
15	88781044	88781192	11.5101	59.175	54.8882	ENSMUSG00000034333	Zbed4	LastExon
7	105389577	105389743	11.4877	51.0033	46.8437	ENSMUSG00000044465	Fam160a2	Exon3
9	58499021	58499682	11.4877	51.0033	46.8437	ENSMUSG00000066607	Insyn1	LastExon
10	100528541	100528661	11.4871	42.0619	38.0513	ENSMUSG00000019971	Cep290	Exon27
2	92614029	92614408	11.4871	42.0619	38.0513	ENSMUSG00000027221	Chst1	LastExon
17	5440146	5440249	11.4871	42.0619	38.0513	ENSMUSG00000004945	Tmem242	Exon1
16	55905278	55905759	11.4056	66.2328	61.8461	ENSMUSG00000022604	Cep97	LastExon
3	126922995	126923194	11.4038	126.249	121.24	ENSMUSG00000032826	Ank2	UTR3
16	8843049	8843245	11.3715	58.0496	53.7798	ENSMUSG00000022507	1810013L24Rik	Exon3
4	102605020	102605700	11.3694	47.1162	43.0196	ENSMUSG00000028525	Pde4b	LastExon
1	135470519	135470636	11.363	66.0766	61.6924	ENSMUSG00000009418	Nav1	Exon6
5	142457829	142458365	11.2843	65.1184	60.7468	ENSMUSG00000056493	Foxk1	UTR3
11	85345658	85346237	11.2583	115.895	110.965	ENSMUSG00000020525	Ppm1d	LastExon
5	136274789	136274934	11.2456	44.1264	40.0807	ENSMUSG00000029705	Cux1	UTR3
18	25479399	25479728	11.2423	176.437	171.068	ENSMUSG00000024268	Celf4	UTR3
X	74317405	74317692	11.2328	56.9297	52.6767	ENSMUSG00000001962	Fam50a	Intron4
16	85795299	85796038	11.2284	50.9209	46.7632	ENSMUSG00000022893	Adamts1	UTR3
7	131391684	131392191	11.2284	50.9209	46.7632	ENSMUSG00000040167	Ikzf5	LastExon
7	131391684	131392191	11.2284	50.9209	46.7632	ENSMUSG00000063179	Pstk	LastExon
7	73429196	73429935	11.2218	123.004	118.019	ENSMUSG00000078671	Chd2	UTR3
10	81363935	81364209	11.2155	47.363	43.2628	ENSMUSG00000020234	4930404N11Rik	UTR3
10	81363935	81364209	11.2155	47.363	43.2628	ENSMUSG00000034854	Mfsd12	UTR3
2	18045808	18046327	11.2091	45.3569	41.2896	ENSMUSG00000054074	Skida1	LastExon
7	19565037	19565653	11.193	95.9009	91.1592	ENSMUSG00000044709	Gemin7	UTR3
18	70453128	70453374	11.1642	48.7417	44.6185	ENSMUSG00000044906	4930503L19Rik	UTR3
5	115125313	115125475	11.1289	113.739	108.828	ENSMUSG00000046562	Unc119b	UTR3
9	58877024	58877394	11.1243	99.5162	94.7348	ENSMUSG00000032340	Neo1	UTR3
3	105716670	105717100	11.1179	85.3007	80.6783	ENSMUSG00000048458	Inka2	LastExon
17	33334183	33335189	11.1087	70.0023	65.5664	ENSMUSG00000003929	Zfp81	UTR3
6	42317869	42318100	11.0942	55.8153	51.5801	ENSMUSG00000029861	Fam131b	UTR3
11	49245384	49245595	11.0942	55.8153	51.5801	ENSMUSG00000020346	Mgat1	UTR5
11	44454861	44455021	11.0942	55.8153	51.5801	ENSMUSG00000041231	Ublcp1	UTR3
11	116030354	116030473	11.0771	39.7482	35.7801	ENSMUSG00000020770	Unk	UTR5
16	84860375	84860546	11.0605	59.0083	54.7241	ENSMUSG00000008976	Gabpa	LastExon
3	88965984	88966310	11.0596	50.4216	46.2701	ENSMUSG00000028053	Ash1l	Exon2
3	144189038	144189182	11.0551	170.658	165.325	ENSMUSG00000028266	Lmo4	UTR3
1	64734793	64735765	11.0545	133.361	128.294	ENSMUSG00000045005	Fzd5	UTR3
3	88412613	88412750	11.0429	68.8512	64.4307	ENSMUSG00000050144	Slc25a44	UTR3
15	81600960	81601483	11.0417	62.9042	58.5633	ENSMUSG00000055024	Ep300	Exon2
7	99925351	99925863	11.0025	48.7417	44.6185	ENSMUSG00000058761	Rnf169	LastExon
11	70669196	70669304	11.0009	70.0023	65.5664	ENSMUSG00000018287	Spag7	Exon1
12	71317491	71317784	10.9874	46.0752	41.9954	ENSMUSG00000044548	Dact1	LastExon
8	83715245	83715337	10.9868	62.856	58.6342	ENSMUSG00000005481	Ddx39	UTR5
6	77244466	77245399	10.9621	74.0178	69.5312	ENSMUSG00000063063	Ctnna2	Intron8
6	77244466	77245399	10.9621	74.0178	69.5312	ENSMUSG00000060780	Lrrtm1	Exon2
1	194812662	194812818	10.9536	84.5046	79.8915	ENSMUSG00000026640	Plxna2	UTR3
10	13008791	13009100	10.9428	210.185	204.602	ENSMUSG00000078348	Sf3b5	LastExon
19	58237956	58238240	10.9229	39.376	35.4155	ENSMUSG00000025089	Gfra1	UTR3
5	114028081	114028318	10.9204	61.8044	57.4785	ENSMUSG00000042078	Svop	UTR3
7	141217339	141217455	10.9091	39.9931	36.0207	ENSMUSG00000038618	Rassf7	Exon3
8	9987645	9987947	10.8762	51.1799	47.0167	ENSMUSG00000040396	Abhd13	LastExon
1	163386279	163386568	10.8721	38.6036	34.6569	ENSMUSG00000040124	Gorab	UTR3
10	82739099	82739215	10.8721	38.6036	34.6569	ENSMUSG00000020246	Hcfc2	Exon14
15	34140661	34141158	10.8721	38.6036	34.6569	ENSMUSG00000022255	Mtdh	LastExon
14	84445896	84446044	10.8721	38.6036	34.6569	ENSMUSG00000035566	Pcdh17	UTR5
18	61697220	61697384	10.8721	38.6036	34.6569	ENSMUSG00000024579	Pcyox1l	UTR3
9	31053958	31054150	10.8721	38.6036	34.6569	ENSMUSG00000047412	Zbtb44	Exon2
7	55979226	55979491	10.8709	41.8483	37.8428	ENSMUSG00000047037	Nipa1	UTR3
4	134278311	134279123	10.8408	47.6206	43.517	ENSMUSG00000050890	Pdik1l	UTR3
16	91227371	91227802	10.8289	136.881	131.787	ENSMUSG00000039830	Olig2	UTR3
11	21571729	21571821	10.8272	43.158	39.2221	ENSMUSG00000020321	Mdh1	Exon1
13	17772430	17772941	10.817	53.6034	49.4022	ENSMUSG00000041297	Cdk13	Exon2
10	75309785	75310181	10.8093	67.9177	63.5093	ENSMUSG00000033444	Specc1l	LastExon
11	46440800	46441226	10.7741	73.8556	69.3705	ENSMUSG00000020397	Med7	LastExon
18	5767707	5767978	10.7628	71.8536	67.3927	ENSMUSG00000024238	Zeb1	Exon6
12	72308414	72308651	10.7329	121.58	116.606	ENSMUSG00000021087	Rtn1	Exon2
2	30822492	30822904	10.7141	78.1346	73.5975	ENSMUSG00000026857	Ntmt1	LastExon
11	84042059	84042184	10.7109	38.8587	34.9077	ENSMUSG00000034940	Synrg	UTR3
8	110970174	110970421	10.6814	68.2644	63.8525	ENSMUSG00000031749	St3gal2	LastExon
4	133662384	133662734	10.68	39.4255	35.4637	ENSMUSG00000043257	Pigv	UTR3
1	192100653	192100913	10.68	39.4255	35.4637	ENSMUSG00000037395	Rcor3	UTR3
9	56917894	56918135	10.68	39.4255	35.4637	ENSMUSG00000032733	Snx33	UTR3
6	85947548	85947738	10.6791	46.5061	42.4195	ENSMUSG00000030002	Dusp11	UTR3
3	54804302	54804513	10.6791	46.5061	42.4195	ENSMUSG00000036615	Rfxap	UTR3
4	133591426	133591599	10.6784	52.5059	48.3222	ENSMUSG00000028848	Gpn2	UTR3
17	48389010	48389309	10.6778	59.6197	55.3254	ENSMUSG00000023994	Nfya	UTR3
14	54577016	54577269	10.676	113.4	108.491	ENSMUSG00000022178	Ajuba	Exon1
5	20303381	20303476	10.6671	37.4675	33.5429	ENSMUSG00000040003	Magi2	Intron6
7	144420902	144421186	10.6671	37.4675	33.5429	ENSMUSG00000037541	Shank2	LastExon
7	29776461	29776629	10.6671	37.4675	33.5429	ENSMUSG00000046185	Zfp84	LastExon
18	67206340	67206474	10.6464	73.2917	68.8141	ENSMUSG00000109901	Chmp1b	UTR3
18	67206340	67206474	10.6464	73.2917	68.8141	ENSMUSG00000024524	Gnal	Intron5
3	32462634	32462993	10.6188	119.47	114.513	ENSMUSG00000027665	Pik3ca	LastExon
2	3464268	3464756	10.6171	46.3271	42.2439	ENSMUSG00000026646	Suv39h2	Exon3
12	101883322	101883713	10.6171	46.3271	42.2439	ENSMUSG00000021188	Trip11	Exon11
7	47053764	47053963	10.6153	112.345	107.446	ENSMUSG00000010307	Tmem86a	LastExon
2	166567227	166567443	10.5972	65.1238	60.7521	ENSMUSG00000039621	Prex1	UTR3
8	22861904	22862720	10.5696	65.6571	61.2781	ENSMUSG00000031540	Kat6a	UTR5
10	62750935	62751059	10.5541	165.144	159.845	ENSMUSG00000020074	Ccar1	Exon20
8	91122291	91122674	10.5397	51.4143	47.2473	ENSMUSG00000031666	Rbl2	LastExon
9	67760088	67760213	10.5186	37.1106	33.1925	ENSMUSG00000091956	C2cd4b	LastExon
15	103289057	103289152	10.5173	45.3983	41.3303	ENSMUSG00000060992	Copz1	Exon2
5	105485911	105486312	10.5173	45.3983	41.3303	ENSMUSG00000070639	Lrrc8b	LastExon
15	9108335	9108622	10.5149	84.8976	80.2798	ENSMUSG00000022253	Nadk2	LastExon
2	59843572	59844073	10.4863	40.8482	36.8606	ENSMUSG00000035168	Tanc1	LastExon
4	126097825	126098276	10.486	38.3027	34.3618	ENSMUSG00000050188	Lsm10	UTR5
9	99389731	99389826	10.486	38.3027	34.3618	ENSMUSG00000032470	Mras	Exon5
17	71750894	71751058	10.486	38.3027	34.3618	ENSMUSG00000044375	Pcare	Exon1
19	5456554	5456840	10.4815	136.653	131.561	ENSMUSG00000095098	Ccdc85b	Intergenic
12	44598330	44598795	10.4621	95.0838	90.3504	ENSMUSG00000020598	Nrcam	LastExon
9	87192590	87192903	10.462	36.3399	32.4357	ENSMUSG00000056919	Cep162	UTR3
6	36507782	36507877	10.462	36.3399	32.4357	ENSMUSG00000045613	Chrm2	LastIntron
18	75692564	75692659	10.462	36.3399	32.4357	ENSMUSG00000052928	Ctif	Intron1
5	23486302	23486397	10.462	36.3399	32.4357	ENSMUSG00000029004	Kmt2e	Exon15
17	32773662	32774139	10.462	36.3399	32.4357	ENSMUSG00000024298	Zfp871	UTR3
10	80311660	80312677	10.4525	89.9117	85.2369	ENSMUSG00000020135	Apc2	LastExon
9	35565565	35565681	10.4352	57.4553	53.1949	ENSMUSG00000050555	Hyls1	LastExon
8	111134723	111135021	10.4352	57.4553	53.1949	ENSMUSG00000033624	Pdpr	LastExon
9	35565565	35565681	10.4352	57.4553	53.1949	ENSMUSG00000032103	Pus3	Exon3
X	60891705	60892128	10.4352	57.4553	53.1949	ENSMUSG00000045179	Sox3	UTR3
1	181177519	181177809	10.4203	128.487	123.456	ENSMUSG00000038733	Wdr26	UTR3
6	134541798	134542038	10.4011	50.3287	46.1791	ENSMUSG00000030201	Lrp6	Exon2
6	38534851	38534966	10.3987	53.1831	49.0936	ENSMUSG00000019689	Fmc1	LastIntron
10	126996495	126996632	10.3983	141.696	136.566	ENSMUSG00000078429	Ctdsp2	UTR3
8	84661485	84662389	10.3952	92.143	87.4436	ENSMUSG00000053560	Ier2	UTR3
11	53402430	53402567	10.3905	115.279	110.354	ENSMUSG00000049470	Aff4	Exon12
4	107896861	107897014	10.386	69.5781	65.148	ENSMUSG00000028608	0610037L13Rik	LastExon
6	42670049	42670337	10.3767	173.161	167.813	ENSMUSG00000036667	Tcaf1	UTR3
10	7919160	7920508	10.3667	147.781	142.605	ENSMUSG00000015755	Tab2	Exon3
17	56259209	56259853	10.3539	63.5116	59.1618	ENSMUSG00000043683	Fem1a	UTR3
14	49172906	49173318	10.3539	63.5116	59.1618	ENSMUSG00000036282	Naa30	Exon1
17	56402274	56402806	10.3297	94.9415	90.2099	ENSMUSG00000024201	Kdm4b	UTR3
10	7702814	7702920	10.3107	37.864	33.9309	ENSMUSG00000040021	Lats1	Exon4
1	30804751	30805490	10.3059	139.622	134.508	ENSMUSG00000048874	Phf3	LastExon
18	46608329	46608478	10.2919	37.188	33.2684	ENSMUSG00000057561	Eif1a	UTR3
16	9751616	9751708	10.2672	39.8062	35.9265	ENSMUSG00000059003	Grin2a	Intron4
X	136976758	136976850	10.2672	39.8062	35.9265	ENSMUSG00000089768	Tmsb15b1	UTR5
8	83669932	83670112	10.2652	66.9455	62.5499	ENSMUSG00000057672	Pkn1	UTR3
8	83669932	83670112	10.2652	66.9455	62.5499	ENSMUSG00000019464	Ptger1	UTR3
4	72118051	72118168	10.2625	49.2489	45.1177	ENSMUSG00000008305	Tle1	UTR3
6	118128741	118128885	10.257	35.2211	31.3385	ENSMUSG00000042042	Csgalnact2	Exon1
18	37145563	37145966	10.257	35.2211	31.3385	ENSMUSG00000102836	Gm37013	Intron1
18	37145563	37145966	10.257	35.2211	31.3385	ENSMUSG00000103125	Gm37388	Intron1
18	37145563	37145966	10.257	35.2211	31.3385	ENSMUSG00000103458	Gm42416	Intron1
X	151003531	151003626	10.257	35.2211	31.3385	ENSMUSG00000025266	Gnl3l	Exon4
18	37145563	37145966	10.257	35.2211	31.3385	ENSMUSG00000103442	Pcdha1	Intron1
18	37145563	37145966	10.257	35.2211	31.3385	ENSMUSG00000007440	Pcdha11	Intron1
18	37145563	37145966	10.257	35.2211	31.3385	ENSMUSG00000102206	Pcdha11	Intron1
18	37145563	37145966	10.257	35.2211	31.3385	ENSMUSG00000103310	Pcdha12	Intron1
18	37145563	37145966	10.257	35.2211	31.3385	ENSMUSG00000104148	Pcdha2	Intron1
18	37145563	37145966	10.257	35.2211	31.3385	ENSMUSG00000102312	Pcdha3	Intron1
18	37145563	37145966	10.257	35.2211	31.3385	ENSMUSG00000104252	Pcdha4	Intron1
18	37145563	37145966	10.257	35.2211	31.3385	ENSMUSG00000103092	Pcdha5	Intron1
18	37145563	37145966	10.257	35.2211	31.3385	ENSMUSG00000103707	Pcdha6	Intron1
18	37145563	37145966	10.257	35.2211	31.3385	ENSMUSG00000104318	Pcdha7	Intron1
18	37145563	37145966	10.257	35.2211	31.3385	ENSMUSG00000103800	Pcdha8	Intron1
18	37145563	37145966	10.257	35.2211	31.3385	ENSMUSG00000103770	Pcdha9	Intron1
18	37145563	37145966	10.257	35.2211	31.3385	ENSMUSG00000103255	Pcdhac1	Intron1
18	37145563	37145966	10.257	35.2211	31.3385	ENSMUSG00000102697	Pcdhac2	Exon1
12	69585169	69585507	10.257	35.2211	31.3385	ENSMUSG00000034801	Sos2	LastExon
11	106073333	106073458	10.257	35.2211	31.3385	ENSMUSG00000001983	Taco1	UTR3
3	103355009	103355173	10.257	35.2211	31.3385	ENSMUSG00000033014	Trim33	UTR3
5	137113394	137113565	10.257	35.2211	31.3385	ENSMUSG00000043279	Trim56	LastExon
9	99583336	99584051	10.2285	86.7671	82.128	ENSMUSG00000032469	Dbr1	LastExon
8	121837696	121838033	10.216	125.376	120.374	ENSMUSG00000092329	Gm20388	Intron1
9	62795606	62795778	10.1939	63.4943	59.1448	ENSMUSG00000032244	Fem1b	UTR3
2	29965674	29965777	10.1939	43.2033	39.1737	ENSMUSG00000057738	Sptan1	UTR5
X	75574656	75574847	10.1919	67.4644	63.0622	ENSMUSG00000031202	Rab39b	LastExon
13	3884083	3884244	10.1914	80.6812	76.1122	ENSMUSG00000021215	Net1	LastExon
7	16564514	16565298	10.1911	92.8551	88.1477	ENSMUSG00000058230	Arhgap35	Exon2
2	148675322	148675897	10.1908	106.072	101.227	ENSMUSG00000036992	Nxt1	UTR5
8	15029090	15029395	10.1748	81.224	76.6484	ENSMUSG00000055675	Kbtbd11	LastExon
11	101525627	101526145	10.1524	53.284	49.0886	ENSMUSG00000017146	Brca1	Exon10
16	28827724	28827915	10.1474	49.5046	45.3687	ENSMUSG00000051065	Mb21d2	UTR3
9	59871775	59871945	10.1383	44.9185	40.86	ENSMUSG00000039585	Myo9a	Exon25
6	119480411	119481304	10.1334	116.568	111.633	ENSMUSG00000030019	Fbxl14	LastExon
6	119480411	119481304	10.1334	116.568	111.633	ENSMUSG00000030170	Wnt5b	Intron1
17	66119531	66119696	10.1238	48.1753	44.0617	ENSMUSG00000024101	Washc1	UTR3
8	22653313	22653411	10.1233	38.0121	34.0762	ENSMUSG00000031536	Polb	Exon1
10	118859497	118860538	10.1105	79.6359	75.0794	ENSMUSG00000028630	Dyrk2	UTR3
13	117656677	117656853	10.0978	36.0818	32.1838	ENSMUSG00000021730	Hcn1	Exon2
2	167038220	167038357	10.0978	36.0818	32.1838	ENSMUSG00000039501	Znfx1	LastExon
9	63640222	63640552	10.0792	85.7254	81.0987	ENSMUSG00000037257	Aagab	LastExon
9	102732501	102732800	10.0732	110.495	105.611	ENSMUSG00000032531	Amotl2	UTR3
4	21993298	21993618	10.0713	54.2477	50.037	ENSMUSG00000028246	Faxc	LastExon
13	51148950	51149287	10.064	64.8314	60.4639	ENSMUSG00000021395	Spin1	LastExon
6	119572818	119572965	10.052	34.1112	30.2517	ENSMUSG00000030172	Erc1	UTR3
1	181090985	181091319	10.052	34.1112	30.2517	ENSMUSG00000026516	Nvl	UTR3
2	181837889	181837986	10.052	34.1112	30.2517	ENSMUSG00000027589	Pcmtd2	UTR5
3	63963531	63963655	10.052	34.1112	30.2517	ENSMUSG00000027822	Slc33a1	Exon1
X	66654231	66654552	10.052	34.1112	30.2517	ENSMUSG00000036790	Slitrk2	LastExon
12	52519379	52519894	10.0358	54.7425	50.5235	ENSMUSG00000035133	Arhgap5	Exon2
8	35589407	35589740	10.0321	42.1163	38.105	ENSMUSG00000070056	Mfhas1	Exon1
19	29809796	29810635	10.0321	42.1163	38.105	ENSMUSG00000074909	Ranbp6	LastExon
14	31493623	31493781	10.0305	60.3283	56.0239	ENSMUSG00000021891	Mettl6	Exon2
6	55046416	55046516	10.0292	96.8755	92.1228	ENSMUSG00000029777	Gars	Exon2
4	41712066	41712545	10.0271	52.2204	48.0409	ENSMUSG00000036114	Rpp25l	UTR3
7	63890344	63891531	10.0046	84.6869	80.0716	ENSMUSG00000052040	Klf13	UTR3
19	7039874	7039971	9.99782	65.3677	60.993	ENSMUSG00000024966	Stip1	Exon1
4	152026397	152026788	9.99471	45.7262	41.6526	ENSMUSG00000028952	Zbtb48	Exon2
8	22192823	22192920	9.98865	41.4794	37.5713	ENSMUSG00000031479	Vps36	UTR5
4	129628422	129629200	9.988	150.721	145.523	ENSMUSG00000053841	Txlna	LastExon
7	75872872	75873100	9.98522	47.1078	43.0112	ENSMUSG00000055652	Klhl25	UTR3
7	40929429	40929587	9.98522	47.1078	43.0112	ENSMUSG00000039257	Vstm2b	LastExon
8	34137571	34137770	9.98311	89.7483	85.075	ENSMUSG00000031513	Leprotl1	UTR3
11	119899286	119899404	9.97768	42.5788	38.5604	ENSMUSG00000025583	Rptor	UTR3
10	68041687	68041972	9.95036	60.6266	56.3178	ENSMUSG00000037846	Rtkn2	Exon12
9	44829112	44829229	9.95004	53.1892	48.9952	ENSMUSG00000002028	Kmt2a	Exon19
3	101060795	101060915	9.95004	53.1892	48.9952	ENSMUSG00000027864	Ptgfrn	Exon5
2	35979389	35979595	9.95004	53.1892	48.9952	ENSMUSG00000026885	Ttll11	Exon1
9	21067523	21067868	9.94819	101.942	97.1376	ENSMUSG00000079677	Fdx1l	LastExon
9	21067523	21067868	9.94819	101.942	97.1376	ENSMUSG00000111497	Gm38431	UTR3
9	21067523	21067868	9.94819	101.942	97.1376	ENSMUSG00000111692	Gm49373	UTR3
6	56778809	56779282	9.93286	56.8411	52.5897	ENSMUSG00000059486	Kbtbd2	UTR3
6	56779486	56779902	9.92995	83.6519	79.0483	ENSMUSG00000059486	Kbtbd2	LastExon
X	166457646	166458250	9.92995	83.6519	79.0483	ENSMUSG00000079316	Rab9	UTR3
11	101766801	101767252	9.92359	35.0332	31.1565	ENSMUSG00000034931	Dhx8	LastExon
1	134506155	134506507	9.92267	59.2766	54.988	ENSMUSG00000042229	Rabif	LastExon
14	76417292	76417441	9.9132	72.423	67.956	ENSMUSG00000022010	Tsc22d1	Exon3
2	165490576	165490891	9.91208	33.7774	29.9249	ENSMUSG00000039725	Trp53rka	UTR3
X	169979516	169979660	9.90374	34.9842	31.1081	ENSMUSG00000035299	Mid1	Intron4
1	78664962	78665513	9.90078	65.3677	60.993	ENSMUSG00000032883	Acsl3	Intron2
1	78664962	78665513	9.90078	65.3677	60.993	ENSMUSG00000079470	Utp14b	LastExon
11	95890404	95890570	9.89386	37.6104	33.7705	ENSMUSG00000013418	B4galnt2	Intron3
6	149044505	149044801	9.84699	33.0104	29.1727	ENSMUSG00000030313	Dennd5b	Exon5
13	102734815	102734957	9.84699	33.0104	29.1727	ENSMUSG00000034751	Mast4	UTR3
14	105131484	105131592	9.84699	33.0104	29.1727	ENSMUSG00000022119	Rbm26	Exon16
17	6043786	6043953	9.84699	33.0104	29.1727	ENSMUSG00000015659	Serac1	UTR3
6	59210225	59210384	9.84699	33.0104	29.1727	ENSMUSG00000049232	Tigd2	LastExon
5	131439296	131440540	9.8466	46.0465	41.9675	ENSMUSG00000029673	Auts2	LastExon
9	108347877	108347972	9.82874	52.1362	47.9584	ENSMUSG00000032612	Usp4	UTR5
17	15769959	15770391	9.82541	42.1332	38.1215	ENSMUSG00000023852	Chd1	LastExon
11	75771418	75772018	9.81602	98.5915	93.8205	ENSMUSG00000020848	Doc2b	UTR3
10	115390670	115391019	9.81485	58.2299	53.9574	ENSMUSG00000034163	Zfc3h1	Exon2
14	31667688	31668026	9.80012	39.6123	35.647	ENSMUSG00000021900	Btd	LastExon
19	4883712	4883850	9.77888	37.7221	33.792	ENSMUSG00000006463	Zdhhc24	LastExon
8	105770138	105770565	9.77041	92.7719	88.0655	ENSMUSG00000037415	Ranbp10	UTR3
7	30160728	30161823	9.76501	285.984	279.979	ENSMUSG00000037029	Zfp146	UTR3
2	33731343	33731526	9.76002	73.5136	69.0329	ENSMUSG00000038740	Mvb12b	UTR3
13	47244528	47245102	9.75374	122.264	117.285	ENSMUSG00000038068	Rnf144b	UTR3
17	68842073	68842265	9.74693	35.2025	31.3217	ENSMUSG00000095407	Tmem200c	LastExon
12	86288956	86289088	9.73819	34.5728	30.7044	ENSMUSG00000021254	Gpatch2l	LastExon
15	39878329	39878696	9.71815	56.0111	51.7728	ENSMUSG00000022305	Lrp12	Exon4
1	4349434	4349648	9.70991	32.6843	28.8549	ENSMUSG00000025900	Rp1	LastExon
17	25730672	25730833	9.70967	33.8953	30.0401	ENSMUSG00000041199	Rpusd1	LastExon
2	137068210	137068544	9.70967	33.8953	30.0401	ENSMUSG00000027281	Slx4ip	LastExon
4	115024236	115024401	9.70967	33.8953	30.0401	ENSMUSG00000028718	Stil	UTR3
17	32775336	32775826	9.70967	33.8953	30.0401	ENSMUSG00000024298	Zfp871	LastExon
1	104934052	104934184	9.70798	44.9915	40.9311	ENSMUSG00000050840	Cdh20	UTR5
17	27767953	27768091	9.70798	44.9915	40.9311	ENSMUSG00000056692	D17Wsu92e	Exon4
5	118762937	118763126	9.70798	44.9915	40.9311	ENSMUSG00000018076	Med13l	UTR3
3	101924156	101924367	9.70798	44.9915	40.9311	ENSMUSG00000033147	Slc22a15	UTR5
1	155847036	155847460	9.70745	51.0886	46.9269	ENSMUSG00000033671	Cep350	UTR3
16	90499084	90499202	9.70745	51.0886	46.9269	ENSMUSG00000053414	Hunk	UTR3
18	43581835	43582250	9.70745	51.0886	46.9269	ENSMUSG00000024502	Jakmip2	Exon3
18	22694725	22695045	9.70745	51.0886	46.9269	ENSMUSG00000041923	Nol4	UTR3
9	70012567	70012660	9.70718	36.5246	32.7045	ENSMUSG00000033543	Gtf2a2	Exon1
1	136270531	136271051	9.70671	63.2885	58.9423	ENSMUSG00000041570	Camsap2	UTR3
2	125739660	125739915	9.70644	68.3597	63.9465	ENSMUSG00000035093	Secisbp2l	UTR3
12	81198641	81199477	9.70644	68.3597	63.9465	ENSMUSG00000079055	Slc8a3	UTR3
7	143460871	143460994	9.70621	74.4634	69.9711	ENSMUSG00000037664	Cdkn1c	UTR5
7	92658558	92658804	9.70586	85.6497	81.024	ENSMUSG00000041328	Pcf11	Exon8
13	21368783	21369722	9.66953	41.0653	37.0732	ENSMUSG00000036721	Zscan12	LastExon
1	153743703	153744294	9.6689	160.938	155.667	ENSMUSG00000026475	Rgs16	LastExon
4	88720223	88720856	9.65148	108.038	103.175	ENSMUSG00000070923	Klhl9	LastExon
8	120161390	120162197	9.64495	96.842	92.0897	ENSMUSG00000031824	6430548M08Rik	UTR3
8	120161390	120162197	9.64495	96.842	92.0897	ENSMUSG00000092329	Gm20388	Intron1
4	134523183	134523354	9.64198	31.9189	28.1039	ENSMUSG00000078521	Aunip	LastExon
6	126737386	126737877	9.64198	31.9189	28.1039	ENSMUSG00000038077	Kcna6	UTR3
13	111714893	111715195	9.64198	31.9189	28.1039	ENSMUSG00000032727	Mier3	LastExon
6	119918623	119918788	9.64198	31.9189	28.1039	ENSMUSG00000030166	Rad52	LastExon
17	56685966	56686061	9.64198	31.9189	28.1039	ENSMUSG00000002372	Ranbp3	Exon2
3	101922109	101922227	9.64198	31.9189	28.1039	ENSMUSG00000033147	Slc22a15	Intron1
3	69004990	69005090	9.64198	31.9189	28.1039	ENSMUSG00000034349	Smc4	UTR5
16	77115475	77115741	9.64198	31.9189	28.1039	ENSMUSG00000022867	Usp25	LastExon
10	70002048	70002518	9.63138	79.5452	74.9902	ENSMUSG00000069601	Ank3	Exon40
X	161836712	161836946	9.61822	67.3339	62.9335	ENSMUSG00000059493	Nhs	UTR3
7	73942323	73943279	9.61822	67.3339	62.9335	ENSMUSG00000025789	St8sia2	UTR3
1	158245810	158246241	9.6146	37.279	33.3576	ENSMUSG00000004031	Brinp2	UTR3
11	117762027	117762181	9.61424	55.6043	51.3721	ENSMUSG00000025571	Tnrc6c	LastExon
11	84988393	84988753	9.60967	62.2555	57.9235	ENSMUSG00000000804	Usp32	Exon32
13	111487476	111487718	9.58615	50.0467	45.9025	ENSMUSG00000116016	Gm49496	Intron1
13	111487476	111487718	9.58615	50.0467	45.9025	ENSMUSG00000032745	Gpbp1	UTR5
18	31906756	31907151	9.58129	44.4263	40.3751	ENSMUSG00000024400	Wdr33	LastExon
16	21652944	21653739	9.57633	89.7253	85.0523	ENSMUSG00000043391	2510009E07Rik	UTR3
8	121836855	121837062	9.57535	175.238	169.878	ENSMUSG00000092329	Gm20388	Intron1
13	58215331	58215598	9.56731	60.2561	55.9531	ENSMUSG00000005312	Ubqln1	Exon1
X	105853316	105853415	9.55673	78.5271	73.9854	ENSMUSG00000031229	Atrx	Exon13
15	75903511	75903668	9.55673	78.5271	73.9854	ENSMUSG00000055762	Eef1d	Intron1
2	174427682	174427978	9.53867	82.0492	77.4643	ENSMUSG00000016256	Ctsz	UTR3
1	180144476	180144610	9.53466	32.8622	29.0288	ENSMUSG00000026490	Cdc42bpa	Exon30
4	70432675	70433525	9.53	66.3123	61.9248	ENSMUSG00000039270	Megf9	UTR3
13	58402420	58402518	9.52365	94.8214	90.0912	ENSMUSG00000021546	Hnrnpk	UTR5
11	78677220	78677655	9.5205	35.447	31.6468	ENSMUSG00000017376	Nlk	Intron1
4	119226157	119226471	9.51559	32.8153	28.9829	ENSMUSG00000078584	AU022252	UTR3
15	101053227	101053568	9.51559	32.8153	28.9829	ENSMUSG00000095440	Fignl2	LastExon
3	95763702	95764092	9.51559	32.8153	28.9829	ENSMUSG00000028106	Rprd2	LastExon
11	87085914	87086059	9.51559	32.8153	28.9829	ENSMUSG00000020495	Smg8	Exon1
11	21277843	21278013	9.51559	32.8153	28.9829	ENSMUSG00000020128	Vps54	Exon7
18	31780852	31781175	9.49792	82.6092	78.0181	ENSMUSG00000041915	Ammecr1l	UTR3
4	32019562	32019736	9.49792	82.6092	78.0181	ENSMUSG00000028284	Map3k7	LastExon
7	28268451	28269088	9.49634	160.234	154.967	ENSMUSG00000046058	Eid2	LastExon
8	31236211	31236427	9.4914	55.1191	50.8949	ENSMUSG00000046152	Fut10	Exon5
3	107895814	107895947	9.4914	55.1191	50.8949	ENSMUSG00000004032	Gstm5	UTR5
4	13889599	13889929	9.4914	55.1191	50.8949	ENSMUSG00000006586	Runx1t1	LastExon
7	56230917	56231356	9.463	93.8153	89.0975	ENSMUSG00000030451	Herc2	LastExon
9	107564873	107565192	9.46263	116.228	111.296	ENSMUSG00000010054	Tusc2	LastExon
6	72206241	72206532	9.43696	30.8369	27.0456	ENSMUSG00000037621	Atoh8	UTR3
10	7608520	7608619	9.43696	30.8369	27.0456	ENSMUSG00000019796	Lrp11	Exon6
2	4991074	4991244	9.43696	30.8369	27.0456	ENSMUSG00000026669	Mcm10	UTR3
12	103404437	103404579	9.43696	30.8369	27.0456	ENSMUSG00000021203	Otub2	UTR3
1	169747547	169747667	9.43696	30.8369	27.0456	ENSMUSG00000038530	Rgs4	UTR5
2	122702141	122702281	9.43696	30.8369	27.0456	ENSMUSG00000005802	Slc30a4	Exon1
3	89418204	89418298	9.43273	65.0357	60.7845	ENSMUSG00000028044	Cks1b	Exon1
5	86829352	86829465	9.41619	34.95	31.0745	ENSMUSG00000035851	Ythdc1	Exon9
17	35956843	35957084	9.40744	76.5014	71.9839	ENSMUSG00000038762	Abcf1	UTR3
3	25436039	25436542	9.39527	40.8479	36.8603	ENSMUSG00000063887	Nlgn1	Exon7
3	95988898	95989543	9.3912	345.59	339.296	ENSMUSG00000015745	Plekho1	UTR3
8	72495839	72496174	9.38522	37.8412	33.9087	ENSMUSG00000045248	Med26	LastExon
8	124370070	124370606	9.38522	37.8412	33.9087	ENSMUSG00000050751	Pgbd5	UTR3
3	63963969	63964313	9.38522	37.8412	33.9087	ENSMUSG00000027822	Slc33a1	Exon1
12	11301517	11301620	9.38522	37.8412	33.9087	ENSMUSG00000020608	Smc6	Exon22
17	80397969	80398674	9.38522	37.8412	33.9087	ENSMUSG00000024241	Sos1	UTR3
7	67225877	67226655	9.38358	54.0923	49.8839	ENSMUSG00000043831	Lysmd4	UTR3
19	41830987	41831539	9.38275	70.3923	65.951	ENSMUSG00000067199	Frat1	LastExon
4	155900266	155900361	9.36892	34.2319	30.3702	ENSMUSG00000029033	Acap3	Exon9
7	35278495	35278899	9.363	97.9171	93.1527	ENSMUSG00000063808	Gpatch1	LastIntron
16	32298846	32299270	9.35357	64.2816	59.9218	ENSMUSG00000014074	Rnf168	LastExon
17	56258329	56258817	9.34356	47.9798	43.8696	ENSMUSG00000043683	Fem1a	LastExon
11	43440584	43440679	9.34356	47.9798	43.8696	ENSMUSG00000020409	Slu7	Exon6
12	83734039	83734683	9.34254	56.3109	52.0677	ENSMUSG00000019969	Psen1	LastExon
7	97685476	97685950	9.34254	56.3109	52.0677	ENSMUSG00000035623	Rsf1	LastExon
X	134689405	134690136	9.34109	135.663	130.578	ENSMUSG00000049804	Armcx4	LastExon
18	46506006	46506359	9.3328	75.4938	70.9885	ENSMUSG00000033319	Fem1c	LastExon
6	98930035	98930173	9.32152	31.7444	27.9349	ENSMUSG00000030067	Foxp1	UTR3
19	10550853	10550968	9.32152	31.7444	27.9349	ENSMUSG00000024667	Tmem216	UTR3
8	48228156	48228998	9.31757	85.7055	81.0791	ENSMUSG00000031561	Tenm3	UTR3
2	54084484	54084885	9.31633	221.382	215.72	ENSMUSG00000075334	Rprm	UTR3
15	12270003	12270168	9.30189	69.384	64.9566	ENSMUSG00000039458	Mtmr12	LastExon
14	48256282	48256659	9.2921	42.9009	38.8761	ENSMUSG00000021846	Peli2	LastExon
10	59222508	59222688	9.28699	35.7891	31.8966	ENSMUSG00000098188	Sowahc	LastExon
15	80160162	80160886	9.28682	41.7004	37.6977	ENSMUSG00000022414	Tab1	LastExon
1	179610098	179610462	9.2867	46.5909	42.5034	ENSMUSG00000038949	Cnst	Exon9
9	44296009	44296499	9.2867	46.5909	42.5034	ENSMUSG00000032119	Hinfp	UTR3
13	55213635	55214083	9.26632	51.2566	47.0924	ENSMUSG00000021488	Nsd1	Exon2
8	83594383	83594489	9.2577	100.72	96.0878	ENSMUSG00000031708	Tecr	Intergenic
8	22177332	22177477	9.25611	66.7818	62.3884	ENSMUSG00000037725	Ckap2	Exon4
5	121853204	121853705	9.2517	44.694	40.6382	ENSMUSG00000044134	Pheta1	LastExon
17	34645614	34645989	9.23863	33.8914	30.0366	ENSMUSG00000033739	Fkbpl	LastExon
1	59163243	59163380	9.23195	29.7646	25.9953	ENSMUSG00000026024	Als2	UTR3
15	97246233	97246569	9.23195	29.7646	25.9953	ENSMUSG00000048218	Amigo2	LastExon
11	17257563	17257658	9.23195	29.7646	25.9953	ENSMUSG00000000581	C1d	UTR5
X	102145030	102145216	9.23195	29.7646	25.9953	ENSMUSG00000051220	Ercc6l	LastExon
8	60671336	60671931	9.23195	29.7646	25.9953	ENSMUSG00000031647	Mfap3l	LastExon
1	127482642	127482854	9.23195	29.7646	25.9953	ENSMUSG00000036155	Mgat5	LastExon
2	65717592	65717727	9.23195	29.7646	25.9953	ENSMUSG00000075318	Scn2a	Exon17
16	3984990	3985144	9.23195	29.7646	25.9953	ENSMUSG00000039738	Slx4	Exon11
3	84164686	84165130	9.23195	29.7646	25.9953	ENSMUSG00000027993	Trim2	UTR3
4	95049851	95050582	9.22728	319.512	313.339	ENSMUSG00000052684	Jun	UTR3
11	4986898	4987003	9.22349	36.7912	32.8798	ENSMUSG00000009090	Ap1b1	UTR5
1	36423963	36424307	9.22349	36.7912	32.8798	ENSMUSG00000001143	Lman2l	LastExon
15	76633170	76633281	9.22349	36.7912	32.8798	ENSMUSG00000059323	Tonsl	Exon17
11	23655539	23655716	9.22226	46.9551	42.8613	ENSMUSG00000020283	Pex13	Exon2
12	85638910	85639179	9.22152	58.1689	53.8974	ENSMUSG00000034271	Jdp2	LastExon
4	118363141	118363384	9.22152	58.1689	53.8974	ENSMUSG00000033253	Szt2	UTR3
1	9745913	9746242	9.21992	54.0298	49.8225	ENSMUSG00000045210	Vcpip1	Exon1
7	25625020	25625349	9.21154	48.0966	43.9844	ENSMUSG00000057229	Dmac2	UTR3
7	140853824	140854248	9.1878	46.8324	42.741	ENSMUSG00000025484	Bet1l	UTR3
7	140853824	140854248	9.1878	46.8324	42.741	ENSMUSG00000110136	Gm45785	LastIntron
16	17154048	17154160	9.18351	73.4895	69.0088	ENSMUSG00000041774	Ydjc	Intron5
3	9434645	9435294	9.18351	73.4895	69.0088	ENSMUSG00000040209	Zfp704	UTR3
X	42094759	42095012	9.17714	62.2677	57.9355	ENSMUSG00000025860	Xiap	Exon1
9	72619142	72619882	9.17	36.6395	32.7307	ENSMUSG00000037674	Rfx7	LastExon
12	76613080	76613305	9.17	36.6395	32.7307	ENSMUSG00000021061	Sptb	Exon16
5	23493218	23493495	9.16794	52.054	47.8773	ENSMUSG00000029004	Kmt2e	Exon17
3	142793061	142793230	9.1657	31.3604	27.5582	ENSMUSG00000004591	Pkn2	UTR3
5	111286257	111286747	9.15976	88.8283	84.1643	ENSMUSG00000033209	Ttc28	LastExon
11	6473774	6474137	9.15472	50.2392	46.0913	ENSMUSG00000094483	Purb	UTR3
11	119038647	119039338	9.15347	41.8655	37.8593	ENSMUSG00000025578	Cbx8	UTR3
19	4318887	4319178	9.15347	41.8655	37.8593	ENSMUSG00000054611	Kdm2a	UTR3
1	136627553	136627921	9.15347	41.8655	37.8593	ENSMUSG00000041483	Zfp281	LastExon
16	46448403	46448841	9.15136	78.6011	74.0581	ENSMUSG00000022656	Nectin3	Intron5
1	156006795	156007705	9.15003	44.9357	40.8768	ENSMUSG00000026466	Tor1aip1	UTR3
4	108737151	108737243	9.14715	33.3172	29.5574	ENSMUSG00000094958	3110021N24Rik	LastIntron
12	83594465	83595168	9.13728	54.2801	50.0688	ENSMUSG00000042628	Zfyve1	Exon3
10	72654863	72654978	9.13169	119.525	114.568	ENSMUSG00000019923	Zwint	UTR5
14	30042027	30042218	9.12744	30.6829	26.8953	ENSMUSG00000015968	Cacna1d	UTR3
11	113625228	113625407	9.12744	30.6829	26.8953	ENSMUSG00000047904	Sstr2	LastExon
19	5891786	5891960	9.12744	30.6829	26.8953	ENSMUSG00000044390	Tigd3	LastExon
17	32977341	32977516	9.12744	30.6829	26.8953	ENSMUSG00000053600	Zfp472	LastExon
9	118061710	118062227	9.12448	57.1589	52.9024	ENSMUSG00000039285	Azi2	LastExon
11	87611021	87611465	9.12349	82.7232	78.1305	ENSMUSG00000018401	Mtmr4	Exon16
5	35392371	35392797	9.11809	255.479	249.635	ENSMUSG00000067438	Hmx1	UTR3
8	121882384	121882553	9.11381	71.3477	66.8941	ENSMUSG00000092329	Gm20388	Intron1
8	121882384	121882553	9.11381	71.3477	66.8941	ENSMUSG00000040010	Slc7a5	UTR3
10	98968883	98969069	9.10096	45.9363	41.8598	ENSMUSG00000019943	Atp2b1	UTR5
13	55245593	55245898	9.10096	45.9363	41.8598	ENSMUSG00000021488	Nsd1	Exon5
2	121166121	121166607	9.09982	34.1077	30.2491	ENSMUSG00000050619	Zscan29	Exon3
X	103185552	103185858	9.08893	61.2672	56.949	ENSMUSG00000082229	Nap1l2	LastExon
14	59629845	59630312	9.08391	140.329	135.21	ENSMUSG00000044461	Shisa2	LastExon
4	156125516	156126100	9.08205	77.6075	73.0768	ENSMUSG00000059939	9430015G10Rik	LastExon
7	80081228	80081375	9.06356	37.4995	33.5741	ENSMUSG00000048897	Zfp710	Exon2
6	134717829	134718606	9.06355	72.2438	67.7783	ENSMUSG00000030203	Dusp16	UTR3
2	33411028	33411479	9.06176	35.7491	31.8575	ENSMUSG00000068966	Zbtb34	LastExon
17	6232450	6232570	9.06012	51.0427	46.882	ENSMUSG00000034377	Tulp4	Exon13
13	63511561	63512027	9.0593	66.3828	61.9944	ENSMUSG00000021466	Ptch1	UTR3
17	25184818	25185284	9.05792	144.137	138.99	ENSMUSG00000067722	BC003965	LastExon
7	128694345	128694533	9.05578	49.8589	45.718	ENSMUSG00000042105	Inpp5f	LastExon
11	86319708	86320009	9.046	36.8665	32.953	ENSMUSG00000034297	Med13	Exon9
4	123001882	123002227	9.03098	95.5406	90.8024	ENSMUSG00000028654	Mycl	UTR3
10	108277206	108277583	9.02744	56.1536	51.9126	ENSMUSG00000019907	Ppp1r12a	LastExon
4	32580124	32580329	9.02693	28.7023	24.957	ENSMUSG00000040270	Bach2	LastExon
14	27480718	27481397	9.02693	28.7023	24.957	ENSMUSG00000046753	Ccdc66	Intergenic
14	27480718	27481397	9.02693	28.7023	24.957	ENSMUSG00000040651	Fam208a	UTR3
9	27155289	27155384	9.02693	28.7023	24.957	ENSMUSG00000031990	Jam3	Exon1
16	4077692	4077787	9.02693	28.7023	24.957	ENSMUSG00000005981	Trap1	Exon1
12	15793416	15794039	9.02649	328.365	322.151	ENSMUSG00000020601	Trib2	UTR3
8	13879468	13880259	9.02596	107.331	102.474	ENSMUSG00000047710	Champ1	LastExon
7	97653112	97653207	9.01485	40.8368	36.8494	ENSMUSG00000035623	Rsf1	Exon5
2	65764571	65764814	9.01485	40.8368	36.8494	ENSMUSG00000075318	Scn2a	LastExon
12	80338412	80339771	9.01273	76.6172	72.0984	ENSMUSG00000049106	Dcaf5	UTR3
13	55699188	55699478	9.00208	153.403	148.183	ENSMUSG00000045767	B230219D22Rik	LastExon
4	15981405	15981689	9.00071	61.2672	56.949	ENSMUSG00000028224	Nbn	Exon11
5	108500329	108500603	9.00071	61.2672	56.949	ENSMUSG00000033623	Pcgf3	LastExon
5	149214896	149215291	9.00071	61.2672	56.949	ENSMUSG00000041264	Uspl1	LastExon
4	133680286	133681994	8.99312	157.552	152.302	ENSMUSG00000007880	Arid1a	UTR3
10	84374062	84374897	8.97967	44.9234	40.8646	ENSMUSG00000020032	Nuak1	UTR3
19	6116115	6116408	8.97843	65.3903	61.0152	ENSMUSG00000024790	Sac3d1	LastExon
7	127608172	127608847	8.97843	65.3903	61.0152	ENSMUSG00000045639	Zfp629	UTR3
8	107070211	107070605	8.97544	46.0682	41.9884	ENSMUSG00000031921	Terf2	UTR3
7	144842724	144842954	8.97487	30.308	26.528	ENSMUSG00000031074	Fgf3	LastExon
1	185464080	185464907	8.96723	58.2105	53.9384	ENSMUSG00000026614	Slc30a10	LastExon
17	35516124	35516284	8.96397	197.538	192.034	ENSMUSG00000050410	Tcf19	UTR5
10	60277690	60277782	8.96047	32.2654	28.5265	ENSMUSG00000004207	Psap	UTR5
16	57569837	57570262	8.9523	50.0368	45.8929	ENSMUSG00000022748	Cmss1	Intron1
16	57569837	57570262	8.9523	50.0368	45.8929	ENSMUSG00000043336	Filip1l	LastExon
X	73673158	73673317	8.9523	50.0368	45.8929	ENSMUSG00000019558	Slc6a8	UTR5
5	57718741	57719127	8.95127	29.6744	25.908	ENSMUSG00000029108	Pcdh7	UTR5
10	62429446	62429629	8.94947	33.7007	29.8494	ENSMUSG00000020079	Supv3l1	LastExon
6	116636276	116636637	8.947	41.7737	37.77	ENSMUSG00000042129	Rassf4	UTR3
7	107436320	107436539	8.93337	29.6308	25.8663	ENSMUSG00000062542	Syt9	Exon3
6	86120139	86120311	8.93093	44.1724	40.1261	ENSMUSG00000030000	Add2	UTR3
2	168231761	168232094	8.93041	55.1531	50.9283	ENSMUSG00000074576	Mocs3	LastExon
11	6596220	6596705	8.92942	79.7695	75.2118	ENSMUSG00000000378	Ccm2	LastExon
14	32082884	32083193	8.91538	43.5404	39.505	ENSMUSG00000021905	Dph3	UTR3
15	81994216	81994368	8.91249	60.2711	55.9677	ENSMUSG00000022472	Desi1	UTR3
4	115041428	115041913	8.91249	60.2711	55.9677	ENSMUSG00000028718	Stil	UTR3
7	80874961	80875451	8.91249	60.2711	55.9677	ENSMUSG00000038797	Zscan2	LastExon
9	37522672	37523228	8.90624	32.4338	28.6095	ENSMUSG00000042138	Msantd2	LastExon
19	53588977	53589076	8.90624	32.4338	28.6095	ENSMUSG00000071497	Nutf2-ps1	LastExon
3	41613220	41613982	8.90571	51.007	46.8473	ENSMUSG00000025764	Jade1	LastExon
12	21325216	21325532	8.90003	34.7149	30.8438	ENSMUSG00000052593	Adam17	UTR3
14	54468534	54468651	8.90003	34.7149	30.8438	ENSMUSG00000022175	Lrp10	Exon5
6	48619213	48619453	8.90003	34.7149	30.8438	ENSMUSG00000007216	Zfp775	LastExon
10	80116245	80116858	8.89536	183.638	178.227	ENSMUSG00000003068	Stk11	UTR5
4	97568500	97568842	8.88985	284.867	278.868	ENSMUSG00000048747	E130114P18Rik	UTR3
1	119416854	119417399	8.88494	69.5244	65.0948	ENSMUSG00000037035	Inhbb	UTR3
13	60760785	60761730	8.88041	104.408	99.5784	ENSMUSG00000021559	Dapk1	LastExon
8	104227034	104227263	8.88041	104.408	99.5784	ENSMUSG00000035824	Tk2	UTR3
2	28552050	28552645	8.86823	149.534	144.345	ENSMUSG00000026821	Ralgds	LastExon
9	44335559	44336035	8.86456	263.44	257.551	ENSMUSG00000049932	H2afx	UTR3
19	45007387	45007579	8.86049	42.0602	38.0502	ENSMUSG00000025209	Twnk	Exon1
11	53415427	53415596	8.85837	43.9166	39.875	ENSMUSG00000049470	Aff4	LastExon
18	34770708	34771064	8.85837	43.9166	39.875	ENSMUSG00000034300	Fam53c	LastExon
X	163956474	163956569	8.85837	43.9166	39.875	ENSMUSG00000031370	Zrsr2	Exon3
1	20803250	20803400	8.851	129.05	124.014	ENSMUSG00000041859	Mcm3	LastExon
9	85743413	85743692	8.84448	49.0362	44.9083	ENSMUSG00000035941	Ibtk	Exon2
7	18958322	18958451	8.84448	49.0362	44.9083	ENSMUSG00000030411	Nova2	LastExon
2	145641617	145641778	8.83556	30.5328	26.7483	ENSMUSG00000063873	Slc24a3	UTR3
14	75323242	75323514	8.83189	103.438	98.6181	ENSMUSG00000022000	Zc3h13	Exon10
18	32240326	32240421	8.8316	41.3897	37.3918	ENSMUSG00000024382	Ercc3	Exon1
4	141199900	141200041	8.8316	41.3897	37.3918	ENSMUSG00000028920	Fbxo42	LastExon
5	69110038	69110805	8.82428	59.2794	54.9905	ENSMUSG00000037653	Kctd8	UTR3
8	105702778	105703090	8.82428	59.2794	54.9905	ENSMUSG00000005699	Pard6a	LastExon
7	78902575	78902782	8.82192	27.6502	23.93	ENSMUSG00000030609	Aen	Exon2
10	70192794	70192960	8.82192	27.6502	23.93	ENSMUSG00000048701	Ccdc6	UTR3
2	125563436	125563906	8.82192	27.6502	23.93	ENSMUSG00000068394	Cep152	LastExon
11	86770041	86770145	8.82192	27.6502	23.93	ENSMUSG00000018425	Dhx40	UTR3
11	115268028	115268380	8.82192	27.6502	23.93	ENSMUSG00000018861	Fdxr	UTR3
19	8898066	8898161	8.82192	27.6502	23.93	ENSMUSG00000071650	Ganab	UTR5
2	181720463	181720610	8.82192	27.6502	23.93	ENSMUSG00000027584	Oprl1	UTR3
5	36954594	36954729	8.82192	27.6502	23.93	ENSMUSG00000029120	Ppp2r2c	UTR3
14	30690587	30690785	8.82192	27.6502	23.93	ENSMUSG00000052395	Rft1	LastExon
4	3569583	3569724	8.82192	27.6502	23.93	ENSMUSG00000028232	Tmem68	Exon3
7	30169658	30169753	8.82192	27.6502	23.93	ENSMUSG00000037029	Zfp146	UTR5
12	108815836	108815969	8.82024	58.1138	53.843	ENSMUSG00000021264	Yy1	UTR3
2	119293276	119293859	8.81939	37.3447	33.4228	ENSMUSG00000034216	Vps18	Exon4
6	115618786	115619187	8.81904	117.841	112.896	ENSMUSG00000000439	Mkrn2	UTR3
6	115618786	115619187	8.81904	117.841	112.896	ENSMUSG00000000441	Raf1	LastExon
6	116021601	116021857	8.81029	68.5425	64.1261	ENSMUSG00000030126	Tmcc1	UTR3
4	120969530	120969686	8.80401	33.3024	29.4596	ENSMUSG00000032870	Smap2	UTR3
2	28469593	28469991	8.78633	49.379	45.2451	ENSMUSG00000035772	Mrps2	LastExon
16	3749417	3749611	8.77935	62.0847	57.7554	ENSMUSG00000022529	Zfp263	LastExon
7	112092768	112093477	8.77183	132.245	127.186	ENSMUSG00000059263	Usp47	Exon21
11	95491828	95492251	8.76919	274.026	268.083	ENSMUSG00000057522	Spop	LastExon
7	127882690	127882929	8.76773	61.4555	57.1353	ENSMUSG00000049739	Zfp646	LastExon
11	116539001	116539548	8.76462	161.056	155.783	ENSMUSG00000020802	Ube2o	UTR3
4	64017200	64017903	8.75681	28.631	24.8889	ENSMUSG00000028364	Tnc	Exon2
14	54368472	54368627	8.75606	51.5401	47.3715	ENSMUSG00000000959	Oxa1l	UTR3
15	87757388	87758236	8.75582	71.0978	66.6466	ENSMUSG00000054863	Fam19a5	UTR3
2	66022594	66022764	8.73929	28.5885	24.847	ENSMUSG00000044647	Csrnp3	LastExon
10	128885314	128885470	8.73929	28.5885	24.847	ENSMUSG00000025352	Gdf11	LastExon
4	136545227	136545571	8.73929	28.5885	24.847	ENSMUSG00000001089	Luzp1	LastExon
11	70451923	70452205	8.73929	28.5885	24.847	ENSMUSG00000018923	Med11	Intron1
1	91527742	91527873	8.73929	28.5885	24.847	ENSMUSG00000034292	Traf3ip1	LastExon
7	43299693	43299874	8.73929	28.5885	24.847	ENSMUSG00000012640	Zfp715	UTR3
19	60528781	60529067	8.73831	33.6887	29.8379	ENSMUSG00000033417	Cacul1	UTR3
13	102735106	102735324	8.73831	33.6887	29.8379	ENSMUSG00000034751	Mast4	LastExon
5	111418150	111418342	8.73831	33.6887	29.8379	ENSMUSG00000070576	Mn1	UTR5
6	71509850	71510271	8.73831	33.6887	29.8379	ENSMUSG00000052656	Rnf103	UTR3
15	98844806	98845070	8.7376	38.7999	34.8494	ENSMUSG00000048154	Kmt2d	Exon40
8	72495839	72496174	8.7376	38.7999	34.8494	ENSMUSG00000045248	Med26	LastExon
19	6057662	6057757	8.7376	38.7999	34.8494	ENSMUSG00000007338	Mrpl49	Exon1
5	123158496	123158770	8.7376	38.7999	34.8494	ENSMUSG00000038384	Setd1b	Exon11
10	105845323	105845431	8.73707	42.9159	38.8905	ENSMUSG00000019897	Ccdc59	Exon2
3	80687950	80688091	8.73707	42.9159	38.8905	ENSMUSG00000033981	Gria2	UTR3
5	142722276	142722410	8.73707	42.9159	38.8905	ENSMUSG00000050822	Slc29a4	UTR3
6	72153576	72153736	8.73707	42.9159	38.8905	ENSMUSG00000056091	St3gal5	LastExon
9	44348109	44348498	8.73707	42.9159	38.8905	ENSMUSG00000032127	Vps11	UTR3
3	88985368	88985736	8.73666	48.041	43.9294	ENSMUSG00000028053	Ash1l	Exon3
13	49383111	49383505	8.73666	48.041	43.9294	ENSMUSG00000037933	Bicd2	LastExon
14	61439722	61439817	8.73666	48.041	43.9294	ENSMUSG00000021929	Kpna3	Exon1
11	77453534	77453763	8.73666	48.041	43.9294	ENSMUSG00000037926	Ssh2	LastExon
18	40206063	40206384	8.73666	48.041	43.9294	ENSMUSG00000024487	Yipf5	UTR3
10	58270716	58270953	8.73606	58.2921	54.0186	ENSMUSG00000038039	Gcc2	Exon6
17	51739650	51740118	8.73606	58.2921	54.0186	ENSMUSG00000023927	Satb1	UTR3
4	22486793	22487512	8.73565	67.5643	63.1605	ENSMUSG00000095139	Pou3f2	UTR3
4	127247007	127247250	8.73565	67.5643	63.1605	ENSMUSG00000042380	Smim12	LastExon
8	102633835	102634618	8.73455	126.162	121.154	ENSMUSG00000031673	Cdh11	UTR3
3	88536945	88537366	8.73415	188.914	183.468	ENSMUSG00000074480	Mex3a	LastExon
11	78037192	78037430	8.73172	31.4016	27.5986	ENSMUSG00000020834	Dhrs13	LastExon
1	74856080	74856281	8.72863	53.7026	49.5	ENSMUSG00000090071	Cdk5r2	LastExon
8	45025400	45025670	8.71931	59.9198	55.6218	ENSMUSG00000070047	Fat1	Exon10
1	55131265	55131360	8.71275	50.4441	46.3956	ENSMUSG00000025979	Mob4	Exon1
11	115393706	115394218	8.71129	34.1794	30.3186	ENSMUSG00000050910	Cdr2l	LastExon
10	127743085	127743400	8.71129	34.1794	30.3186	ENSMUSG00000044617	Zbtb39	LastExon
2	120317607	120318015	8.69984	40.3799	36.4001	ENSMUSG00000027291	Vps39	UTR3
1	78664962	78665513	8.69624	49.0181	44.8906	ENSMUSG00000032883	Acsl3	Intron2
1	78664962	78665513	8.69624	49.0181	44.8906	ENSMUSG00000079470	Utp14b	LastExon
7	5032127	5032589	8.69434	36.9619	33.0458	ENSMUSG00000109129	Gm44973	LastIntron
18	88869111	88869485	8.69434	36.9619	33.0458	ENSMUSG00000056153	Socs6	UTR3
7	5032127	5032589	8.69434	36.9619	33.0458	ENSMUSG00000074405	Zfp865	LastIntron
4	22486793	22487512	8.67803	86.1307	81.4986	ENSMUSG00000095139	Pou3f2	UTR3
1	79435168	79435377	8.67803	86.1307	81.4986	ENSMUSG00000050711	Scg2	LastExon
7	98715197	98715600	8.67365	158.192	152.938	ENSMUSG00000030753	Thap12	LastExon
7	4993805	4994509	8.67365	158.192	152.938	ENSMUSG00000051550	Zfp579	LastExon
1	127803377	127803791	8.66511	138.66	133.553	ENSMUSG00000026349	Ccnt2	LastExon
4	119136756	119137264	8.66441	407.258	400.728	ENSMUSG00000028645	Slc2a1	UTR3
4	45399319	45399785	8.65497	61.4611	57.1407	ENSMUSG00000045973	Slc25a51	LastExon
9	63649771	63650247	8.65161	29.5	25.7377	ENSMUSG00000032402	Smad3	UTR3
4	62394098	62394357	8.64785	57.3093	53.0504	ENSMUSG00000066149	Cdc26	UTR3
7	123479829	123480075	8.64697	59.568	55.2745	ENSMUSG00000030757	Zkscan2	UTR3
7	28268451	28269088	8.64541	94.9517	90.2198	ENSMUSG00000046058	Eid2	LastExon
2	51131948	51132503	8.63994	300.373	294.296	ENSMUSG00000017144	Rnd3	UTR3
3	94958779	94959030	8.63929	52.1807	48.002	ENSMUSG00000005774	Rfx5	UTR3
5	115097262	115097797	8.63781	99.5847	94.8028	ENSMUSG00000072693	Gm10401	Intergenic
5	115097262	115097797	8.63781	99.5847	94.8028	ENSMUSG00000029550	Sppl3	UTR3
7	127878715	127879362	8.63286	45.937	41.8605	ENSMUSG00000049739	Zfp646	Intergenic
12	112821323	112821858	8.63046	137.707	132.607	ENSMUSG00000047832	Cdca4	UTR3
2	91210831	91211468	8.62412	49.2918	45.1596	ENSMUSG00000002103	Acp2	UTR3
5	84331511	84331787	8.62052	58.3097	54.0359	ENSMUSG00000029245	Epha5	Exon3
8	107412661	107413007	8.61775	52.0878	47.9108	ENSMUSG00000003848	Nob1	LastExon
10	69210223	69210455	8.6169	26.6084	22.9117	ENSMUSG00000090622	A930033H14Rik	UTR3
15	101053227	101053568	8.6169	26.6084	22.9117	ENSMUSG00000095440	Fignl2	LastExon
11	120467668	120467763	8.6169	26.6084	22.9117	ENSMUSG00000025793	Hgs	UTR5
11	120467668	120467763	8.6169	26.6084	22.9117	ENSMUSG00000116045	Hgs	UTR5
13	41311656	41311939	8.6169	26.6084	22.9117	ENSMUSG00000021365	Nedd9	UTR3
10	93644804	93644951	8.6169	26.6084	22.9117	ENSMUSG00000020019	Ntn4	Exon2
6	91013127	91013230	8.6169	26.6084	22.9117	ENSMUSG00000030091	Nup210	UTR3
4	135978816	135978914	8.6169	26.6084	22.9117	ENSMUSG00000028669	Pithd1	Exon4
13	110400216	110400601	8.6169	26.6084	22.9117	ENSMUSG00000021701	Plk2	LastExon
10	8730209	8730338	8.6169	26.6084	22.9117	ENSMUSG00000015305	Sash1	Exon18
17	32978275	32978628	8.6169	26.6084	22.9117	ENSMUSG00000053600	Zfp472	LastExon
4	126925551	126925698	8.6169	26.6084	22.9117	ENSMUSG00000042446	Zmym4	Exon3
12	52567142	52567387	8.61578	41.9215	37.9142	ENSMUSG00000035133	Arhgap5	LastExon
7	16117640	16117965	8.61578	41.9215	37.9142	ENSMUSG00000006024	Napa	UTR3
5	135840322	135840434	8.61578	41.9215	37.9142	ENSMUSG00000039860	Srrm3	Exon3
15	81650192	81650454	8.61392	80.04	75.4788	ENSMUSG00000055024	Ep300	LastExon
2	27020412	27020535	8.61055	62.9295	58.5881	ENSMUSG00000015488	Cacfd1	UTR3
13	17717964	17718875	8.59898	37.792	33.8609	ENSMUSG00000041297	Cdk13	UTR3
8	56591588	56591759	8.59898	37.792	33.8609	ENSMUSG00000038206	Fbxo8	LastExon
11	95680150	95680574	8.59898	37.792	33.8609	ENSMUSG00000038845	Phb	UTR3
11	86298337	86298711	8.59686	70.7487	66.3022	ENSMUSG00000034297	Med13	Exon16
11	116338216	116338657	8.58766	70.6951	66.2503	ENSMUSG00000052949	Rnf157	UTR3
11	94288013	94288462	8.58231	64.4715	60.1087	ENSMUSG00000020863	Luc7l3	UTR3
6	124431435	124431717	8.57658	32.6708	28.8416	ENSMUSG00000008153	Clstn3	UTR3
19	56544087	56544337	8.57658	32.6708	28.8416	ENSMUSG00000025077	Dclre1a	Exon2
7	30057002	30057155	8.57658	32.6708	28.8416	ENSMUSG00000058447	Gm26920	UTR3
5	135436436	135436552	8.57658	32.6708	28.8416	ENSMUSG00000039959	Hip1	Exon13
2	101716882	101717375	8.57658	32.6708	28.8416	ENSMUSG00000032841	Prr5l	UTR3
2	65461333	65461511	8.57658	32.6708	28.8416	ENSMUSG00000057182	Scn3a	LastExon
7	30057002	30057155	8.57658	32.6708	28.8416	ENSMUSG00000098022	Zfp82	LastExon
4	13890343	13890478	8.56234	27.5975	23.8795	ENSMUSG00000006586	Runx1t1	UTR3
2	59936696	59936794	8.55963	56.3311	52.0872	ENSMUSG00000026987	Baz2b	Exon15
4	148055879	148056058	8.55963	56.3311	52.0872	ENSMUSG00000029009	Mthfr	UTR3
14	55095864	55096007	8.55963	56.3311	52.0872	ENSMUSG00000045691	Thtpa	Exon1
16	33496514	33497574	8.55328	79.079	74.5298	ENSMUSG00000022811	Zfp148	LastExon
6	71391618	71391920	8.5479	126.512	121.501	ENSMUSG00000002222	Rmnd5a	UTR3
10	90969806	90969904	8.54522	27.556	23.8385	ENSMUSG00000058589	Anks1b	UTR3
2	144406931	144407269	8.54522	27.556	23.8385	ENSMUSG00000027425	Kat14	UTR3
17	46171894	46172067	8.54522	27.556	23.8385	ENSMUSG00000023953	Polh	UTR3
13	63563686	63563843	8.54522	27.556	23.8385	ENSMUSG00000021466	Ptch1	Exon1
6	125306971	125307141	8.54226	51.1999	47.0361	ENSMUSG00000030339	Ltbr	UTR3
2	152893562	152893901	8.54226	51.1999	47.0361	ENSMUSG00000027469	Tpx2	LastExon
17	5341550	5343142	8.54048	121.39	116.418	ENSMUSG00000069729	Arid1b	LastExon
10	25359857	25359981	8.53244	116.267	111.334	ENSMUSG00000019978	Epb41l2	UTR5
11	76258502	76258747	8.52984	70.3569	65.9161	ENSMUSG00000020844	Nxn	UTR3
8	10985907	10986144	8.52838	29.7447	25.9768	ENSMUSG00000038894	Irs2	UTR3
10	81207832	81207933	8.52755	69.783	65.3499	ENSMUSG00000034958	Atcay	Exon11
5	38213860	38213995	8.52556	35.321	31.4371	ENSMUSG00000029127	Zbtb49	Exon3
19	5690374	5690512	8.52149	48.3098	44.1944	ENSMUSG00000004054	Map3k11	Exon3
13	55609639	55609860	8.52102	46.0674	41.9877	ENSMUSG00000021504	B4galt7	UTR3
5	129502467	129502842	8.51898	64.1321	59.7746	ENSMUSG00000029439	Sfswap	Exon1
9	44636650	44636906	8.51171	64.6529	60.2876	ENSMUSG00000032097	Ddx6	UTR3
18	61587942	61588078	8.50898	113.804	108.893	ENSMUSG00000024576	Csnk1a1	UTR3
7	105555273	105555738	8.50431	47.6802	43.5752	ENSMUSG00000037049	Smpd1	Exon2
16	31989167	31989323	8.49985	31.898	28.0849	ENSMUSG00000022772	Senp5	Exon2
1	43075305	43075925	8.49695	26.3285	22.6388	ENSMUSG00000070939	Tgfbrap1	Exon3
18	31888620	31889077	8.48322	41.4522	37.4534	ENSMUSG00000024400	Wdr33	Exon16
17	84993797	84994395	8.47466	93.6252	88.9095	ENSMUSG00000061130	Ppm1b	Exon2
2	152687279	152687571	8.46035	36.7912	32.8798	ENSMUSG00000019188	H13	Intron4
12	51748465	51748938	8.46035	36.7912	32.8798	ENSMUSG00000035247	Hectd1	Exon38
2	152687279	152687571	8.46035	36.7912	32.8798	ENSMUSG00000042814	Mcts2	LastExon
4	32738596	32738723	8.46035	36.7912	32.8798	ENSMUSG00000058006	Mdn1	Exon64
4	145156225	145156606	8.46035	36.7912	32.8798	ENSMUSG00000020220	Vps13d	Exon19
5	67055509	67055721	8.45897	39.012	35.0574	ENSMUSG00000037736	Limch1	UTR3
9	108209180	108209420	8.45892	66.5955	62.2042	ENSMUSG00000039952	Dag1	LastExon
18	83001263	83001807	8.45823	68.821	64.4008	ENSMUSG00000058881	Zfp516	LastExon
1	125435350	125435649	8.45404	60.9958	56.6816	ENSMUSG00000026341	Actr3	UTR5
16	87488805	87488900	8.43593	123.672	118.682	ENSMUSG00000025613	Cct8	Exon7
15	66642403	66642677	8.43561	27.8427	24.1172	ENSMUSG00000072501	Phf20l1	UTR3
14	31011622	31011891	8.43194	45.162	41.0982	ENSMUSG00000021916	Glt8d1	LastExon
18	65623343	65623662	8.42849	91.5956	86.9023	ENSMUSG00000042439	Zfp532	Exon3
4	135217032	135217210	8.42403	118.551	113.601	ENSMUSG00000037242	Clic4	UTR3
19	4761944	4762296	8.4203	159.923	154.658	ENSMUSG00000096370	Gm21992	LastIntron
19	4761944	4762296	8.4203	159.923	154.658	ENSMUSG00000033760	Rbm4b	LastExon
X	136033987	136034175	8.41485	31.6613	27.8529	ENSMUSG00000048355	Arxes1	LastExon
2	25243884	25244064	8.41485	31.6613	27.8529	ENSMUSG00000044628	Rnf208	LastExon
5	115482681	115482943	8.41485	31.6613	27.8529	ENSMUSG00000029524	Sirt4	Exon2
7	127042343	127042456	8.4132	45.089	41.0267	ENSMUSG00000030677	Kif22	Exon1
2	93981515	93981610	8.41189	25.5774	21.9042	ENSMUSG00000040174	Alkbh3	Exon9
2	93981515	93981610	8.41189	25.5774	21.9042	ENSMUSG00000098004	Gm27027	Intron1
3	82108635	82109210	8.41189	25.5774	21.9042	ENSMUSG00000033910	Gucy1a1	Exon5
10	39891819	39891968	8.41189	25.5774	21.9042	ENSMUSG00000096687	Mfsd4b4	LastExon
11	80139891	80140130	8.41189	25.5774	21.9042	ENSMUSG00000046909	Tefm	Exon2
8	13297358	13297475	8.41189	25.5774	21.9042	ENSMUSG00000038497	Tmco3	Intron5
1	172631422	172631733	8.40238	27.2085	23.4978	ENSMUSG00000026544	Dusp23	UTR3
3	138443098	138443194	8.40044	29.164	25.4881	ENSMUSG00000028138	Adh5	LastExon
9	69989500	69989618	8.40044	29.164	25.4881	ENSMUSG00000011958	Bnip2	UTR5
8	124520794	124520893	8.40044	29.164	25.4881	ENSMUSG00000031979	Cog2	UTR5
14	77470559	77470651	8.40044	29.164	25.4881	ENSMUSG00000022012	Enox1	Intron5
8	48228156	48228998	8.39272	56.6501	52.4016	ENSMUSG00000031561	Tenm3	UTR3
X	102067982	102068653	8.38925	37.1174	33.1993	ENSMUSG00000079481	Nhsl2	Intron1
X	102067982	102068653	8.38925	37.1174	33.1993	ENSMUSG00000049191	Rtl5	UTR3
3	97767162	97767353	8.38518	41.1016	37.1088	ENSMUSG00000038170	Pde4dip	Intron8
4	34807510	34808060	8.3834	40.5413	36.5587	ENSMUSG00000039967	Zfp292	LastExon
11	84040920	84041231	8.3832	54.3884	50.1745	ENSMUSG00000034940	Synrg	LastExon
5	33372765	33373181	8.38204	46.0751	41.9953	ENSMUSG00000079562	Maea	UTR3
13	101684113	101684533	8.37742	90.6464	85.9635	ENSMUSG00000041417	Pik3r1	UTR3
15	75624191	75624565	8.37742	90.6464	85.9635	ENSMUSG00000047003	Zfp41	UTR3
1	36525193	36525320	8.37573	39.2841	35.3258	ENSMUSG00000001138	Cnnm3	UTR3
1	150328275	150328401	8.3754	212.893	207.292	ENSMUSG00000006007	Pdc	UTR5
7	133759460	133760115	8.37452	249.139	243.325	ENSMUSG00000030986	Dhx32	Exon2
7	68004009	68004327	8.37318	39.9516	35.98	ENSMUSG00000005533	Igf1r	Exon2
1	180866089	180866266	8.37318	39.9516	35.98	ENSMUSG00000038806	Sde2	LastExon
3	37642608	37642851	8.37318	39.9516	35.98	ENSMUSG00000037211	Spry1	UTR5
11	117815820	117816026	8.37133	76.2151	71.701	ENSMUSG00000093485	Gm20708	Intron1
7	122671831	122671952	8.36605	31.5247	27.7189	ENSMUSG00000066189	Cacng3	Exon1
14	49172906	49173318	8.36243	62.7314	58.3925	ENSMUSG00000036282	Naa30	Exon1
2	160965276	160965611	8.35765	85.5206	80.8961	ENSMUSG00000057133	Chd6	Exon31
7	127559052	127559432	8.35765	85.5206	80.8961	ENSMUSG00000107023	Gm42715	Exon29
7	127559052	127559432	8.35765	85.5206	80.8961	ENSMUSG00000053877	Srcap	LastExon
15	80212059	80212567	8.35186	33.6883	29.8379	ENSMUSG00000042428	Mgat3	LastExon
12	21325216	21325532	8.35114	26.5338	22.8398	ENSMUSG00000052593	Adam17	UTR3
9	3430901	3431078	8.35114	26.5338	22.8398	ENSMUSG00000025898	Cwf19l2	Exon8
5	45723508	45723774	8.35114	26.5338	22.8398	ENSMUSG00000015882	Lcorl	LastExon
17	33691752	33692073	8.34818	49.2535	45.1218	ENSMUSG00000079557	2020-03-02	LastIntron
8	70225031	70225218	8.34818	49.2535	45.1218	ENSMUSG00000002343	Armc6	Exon4
15	84934914	84935254	8.34719	72.0378	67.5742	ENSMUSG00000016619	Nup50	Exon5
6	86368755	86369010	8.33774	103.184	98.3668	ENSMUSG00000057497	Fam136a	LastExon
2	163615721	163616311	8.33648	30.8918	27.0997	ENSMUSG00000017679	Ttpal	UTR3
1	136280480	136280752	8.33555	80.3942	75.8288	ENSMUSG00000041570	Camsap2	Exon13
5	86037351	86037677	8.33555	80.3942	75.8288	ENSMUSG00000029253	Cenpc1	Exon8
13	72631312	72631560	8.33152	57.5988	53.3359	ENSMUSG00000001504	Irx2	Exon3
14	104479813	104480143	8.33152	57.5988	53.3359	ENSMUSG00000022120	Rnf219	LastExon
1	193107418	193107777	8.32173	35.7977	31.9047	ENSMUSG00000016181	Diexf	UTR3
15	76370879	76371089	8.32173	35.7977	31.9047	ENSMUSG00000022554	Hgh1	UTR3
1	84037491	84037662	8.32173	35.7977	31.9047	ENSMUSG00000045658	Pid1	UTR3
2	3225832	3226905	8.30538	44.1163	40.0708	ENSMUSG00000050530	Fam171a1	LastExon
11	82783559	82783829	8.30538	44.1163	40.0708	ENSMUSG00000020697	Lig3	Exon2
17	3197775	3198204	8.30319	125.032	120.033	ENSMUSG00000046201	Scaf8	LastExon
6	8592956	8593406	8.29498	53.424	49.2266	ENSMUSG00000029638	Glcci1	LastExon
6	8592956	8593406	8.29498	53.424	49.2266	ENSMUSG00000107705	Gm45062	UTR3
7	99267773	99268143	8.29355	68.406	63.9917	ENSMUSG00000055407	Map6	UTR5
2	151969691	151970504	8.28985	110.61	105.726	ENSMUSG00000027459	Fam110a	UTR3
12	41451792	41452269	8.28856	63.4299	59.0815	ENSMUSG00000056899	Immp2l	Intron4
12	41451792	41452269	8.28856	63.4299	59.0815	ENSMUSG00000036295	Lrrn3	UTR3
17	33334183	33335189	8.28717	34.5911	30.7225	ENSMUSG00000003929	Zfp81	UTR3
12	86077642	86077927	8.28369	27.4632	23.7481	ENSMUSG00000021253	Tgfb3	Exon1
10	79758630	79758964	8.27933	76.1602	71.6469	ENSMUSG00000035890	Rnf126	UTR3
16	32232905	32233255	8.2773	45.1052	41.0427	ENSMUSG00000035764	Fbxo45	UTR3
9	105644400	105644923	8.27299	38.9304	34.9781	ENSMUSG00000032571	Pik3r4	Exon2
1	60477128	60477282	8.25312	30.6604	26.8734	ENSMUSG00000026782	Abi2	UTR3
11	86807437	86807532	8.25312	30.6604	26.8734	ENSMUSG00000018425	Dhx40	Exon1
2	140419963	140420072	8.25312	30.6604	26.8734	ENSMUSG00000068205	Macrod2	Intron2
5	66301902	66302638	8.25188	39.9516	35.98	ENSMUSG00000029207	Apbb2	UTR3
3	105678391	105678574	8.25188	39.9516	35.98	ENSMUSG00000027905	Ddx20	UTR3
6	42318282	42318440	8.25188	39.9516	35.98	ENSMUSG00000029861	Fam131b	LastExon
8	91033357	91033960	8.25114	48.288	44.1727	ENSMUSG00000056608	Chd9	Exon32
17	14943687	14944213	8.25065	57.5988	53.3359	ENSMUSG00000050088	1600012H06Rik	LastExon
10	42563165	42563468	8.24932	118.978	114.025	ENSMUSG00000019803	Nr2e1	UTR3
11	60864536	60864999	8.24924	127.348	122.327	ENSMUSG00000043284	Tmem11	UTR3
13	22040714	22040889	8.24828	26.8293	23.1281	ENSMUSG00000060639	Hist1h4i	UTR3
13	93441105	93441220	8.24828	26.8293	23.1281	ENSMUSG00000021690	Jmy	Exon9
3	19227488	19227843	8.24436	39.4977	35.5346	ENSMUSG00000069094	Pde7a	UTR3
5	116442589	116442906	8.24436	39.4977	35.5346	ENSMUSG00000063919	Srrm4	UTR3
10	59950373	59950548	8.23438	149.204	144.018	ENSMUSG00000020108	Ddit4	UTR3
11	62317615	62317843	8.22421	87.8152	83.1633	ENSMUSG00000018501	Ncor1	UTR3
9	123021034	123021436	8.22166	35.0613	31.2688	ENSMUSG00000066233	Tmem42	Intergenic
1	4781906	4782083	8.21377	28.149	24.4954	ENSMUSG00000033845	Mrpl15	LastExon
8	121601199	121601464	8.21314	60.826	56.515	ENSMUSG00000092329	Gm20388	Intron1
8	121601199	121601464	8.21314	60.826	56.515	ENSMUSG00000061410	Zcchc14	UTR3
7	44461546	44462439	8.212	118.046	113.1	ENSMUSG00000047085	Lrrc4b	LastExon
1	37420282	37420446	8.21155	26.1953	22.5086	ENSMUSG00000026112	Coa5	UTR3
9	82871097	82871826	8.20918	141.08	135.956	ENSMUSG00000032253	Phip	UTR3
12	54695746	54695861	8.2077	48.8541	44.8298	ENSMUSG00000054302	Eapp	Exon1
4	133971031	133971258	8.20704	76.7699	72.2488	ENSMUSG00000012117	Dhdds	LastExon
11	107876804	107876968	8.20687	24.5572	20.9083	ENSMUSG00000040373	Cacng5	UTR3
1	188211724	188211883	8.20687	24.5572	20.9083	ENSMUSG00000026610	Esrrg	UTR3
7	51861562	51861724	8.20687	24.5572	20.9083	ENSMUSG00000092118	Fancf	LastExon
12	95780569	95781016	8.20687	24.5572	20.9083	ENSMUSG00000047414	Flrt2	LastExon
8	69902454	69902569	8.20687	24.5572	20.9083	ENSMUSG00000036199	Ndufa13	UTR5
14	38370602	38370736	8.20687	24.5572	20.9083	ENSMUSG00000041014	Nrg3	LastExon
2	144538701	144539019	8.20687	24.5572	20.9083	ENSMUSG00000027427	Polr3f	UTR3
2	53191133	53191238	8.20687	24.5572	20.9083	ENSMUSG00000061136	Prpf40a	Exon1
3	138902412	138902658	8.20687	24.5572	20.9083	ENSMUSG00000028152	Tspan5	LastExon
8	69902454	69902569	8.20687	24.5572	20.9083	ENSMUSG00000047654	Tssk6	LastExon
17	12974683	12974847	8.20687	24.5572	20.9083	ENSMUSG00000060475	Wtap	UTR3
17	72836696	72836791	8.20687	24.5572	20.9083	ENSMUSG00000039770	Ypel5	UTR5
7	29829651	29829870	8.20687	24.5572	20.9083	ENSMUSG00000011427	Zfp790	LastExon
8	88257293	88257502	8.20677	52.4644	48.2814	ENSMUSG00000036779	Papd5	UTR3
5	137315214	137315370	8.20677	52.4644	48.2814	ENSMUSG00000037344	Slc12a9	LastExon
10	21368312	21368606	8.2028	32.6962	28.8663	ENSMUSG00000019977	Hbs1l	UTR3
3	34651214	34651681	8.1985	257.536	251.679	ENSMUSG00000074637	Sox2	LastExon
4	4767596	4767979	8.19756	43.1495	39.1208	ENSMUSG00000066324	Impad1	UTR3
7	62462970	62463613	8.19756	43.1495	39.1208	ENSMUSG00000070526	Peg12	UTR3
1	161970685	161970858	8.19756	43.1495	39.1208	ENSMUSG00000026698	Pigc	LastExon
7	99858811	99858914	8.19592	82.6913	78.0992	ENSMUSG00000035227	Spcs2	Exon1
8	105856243	105856704	8.18648	63.4068	59.0592	ENSMUSG00000036442	Thap11	LastExon
1	171341050	171341177	8.18099	65.0097	60.6401	ENSMUSG00000013997	Nit1	UTR3
2	158638723	158639126	8.17342	25.5612	21.8895	ENSMUSG00000037761	Actr5	LastExon
9	40293646	40293907	8.17326	27.7263	24.003	ENSMUSG00000040111	Gramd1b	UTR3
9	107570215	107570864	8.17262	41.964	37.9558	ENSMUSG00000010047	Hyal2	LastExon
4	106662531	106663135	8.17215	73.6647	69.182	ENSMUSG00000025413	Ttc4	UTR3
13	80894088	80894256	8.16979	56.644	52.3956	ENSMUSG00000074794	Arrdc3	UTR3
2	168925606	168925923	8.16979	56.644	52.3956	ENSMUSG00000027551	Zfp64	Intron5
3	96155757	96156060	8.16131	99.4367	94.6559	ENSMUSG00000038495	Otud7b	LastExon
10	20329272	20329374	8.15719	164.097	158.804	ENSMUSG00000037608	Bclaf1	Exon8
1	191909006	191909180	8.15707	25.522	21.8509	ENSMUSG00000037434	Slc30a1	LastExon
2	137067921	137068054	8.15707	25.522	21.8509	ENSMUSG00000027281	Slx4ip	LastExon
2	152109435	152109591	8.15707	25.522	21.8509	ENSMUSG00000032802	Srxn1	UTR3
13	5864786	5865261	8.15411	47.3278	43.2283	ENSMUSG00000000078	Klf6	Exon2
12	70013718	70014187	8.15411	47.3278	43.2283	ENSMUSG00000021068	Nin	UTR3
18	84013004	84013493	8.15411	47.3278	43.2283	ENSMUSG00000046982	Tshz1	UTR3
5	138178432	138178657	8.15064	82.36	77.7717	ENSMUSG00000019518	Ap4m1	LastExon
5	138178432	138178657	8.15064	82.36	77.7717	ENSMUSG00000036980	Taf6	Intergenic
5	100078718	100079303	8.14437	33.6051	29.7562	ENSMUSG00000050640	Tmem150c	UTR3
7	101898904	101899023	8.14232	31.4328	27.6287	ENSMUSG00000030649	Anapc15	Exon5
7	101898904	101899023	8.14232	31.4328	27.6287	ENSMUSG00000078630	Tomt	UTR3
X	73949813	73950517	8.14068	138.606	133.499	ENSMUSG00000031386	Hcfc1	Exon17
8	124003023	124003369	8.13994	29.2619	25.5053	ENSMUSG00000092329	Gm20388	Intron1
8	124003023	124003369	8.13994	29.2619	25.5053	ENSMUSG00000038697	Taf5l	Exon4
17	5341550	5343142	8.13849	59.8794	55.5817	ENSMUSG00000069729	Arid1b	LastExon
18	46505044	46505421	8.13849	59.8794	55.5817	ENSMUSG00000033319	Fem1c	UTR3
2	160949269	160950158	8.13735	116.186	111.254	ENSMUSG00000057133	Chd6	UTR3
8	13146523	13146661	8.13548	49.4183	45.284	ENSMUSG00000031446	Cul4a	LastExon
7	119716737	119716976	8.13407	94.3175	89.5927	ENSMUSG00000030942	Thumpd1	LastExon
9	50843124	50843437	8.1338	24.927	21.2692	ENSMUSG00000032059	Alg9	UTR3
2	52402050	52402415	8.13059	38.9764	35.0226	ENSMUSG00000036093	Arl5a	UTR3
14	24135314	24135535	8.13059	38.9764	35.0226	ENSMUSG00000021782	Dlg5	UTR3
14	47531195	47531690	8.13059	38.9764	35.0226	ENSMUSG00000037536	Fbxo34	UTR3
11	80478510	80478981	8.12985	83.2914	78.6926	ENSMUSG00000048895	Cdk5r1	UTR3
15	98135866	98136409	8.12751	40.708	36.723	ENSMUSG00000048175	Asb8	LastExon
4	62423832	62424292	8.12493	39.4977	35.5346	ENSMUSG00000066148	Prpf4	UTR3
11	120610087	120610211	8.12204	37.3227	33.4009	ENSMUSG00000025137	Pcyt2	UTR3
18	24600913	24601240	8.11891	50.9695	46.8107	ENSMUSG00000024270	Slc39a6	Exon2
9	106858721	106859047	8.11855	51.5095	47.3412	ENSMUSG00000040325	Dcaf1	Exon13
3	40805068	40805892	8.11855	51.5095	47.3412	ENSMUSG00000025758	Plk4	Exon5
7	127608172	127608847	8.1165	48.7919	44.6681	ENSMUSG00000045639	Zfp629	UTR3
10	118859497	118860538	8.11167	64.0662	59.7093	ENSMUSG00000028630	Dyrk2	UTR3
9	20643383	20644079	8.10875	56.8759	52.6239	ENSMUSG00000066892	Fbxl12	UTR5
9	20643383	20644079	8.10875	56.8759	52.6239	ENSMUSG00000084786	Ubl5	Exon1
19	58797162	58797581	8.10411	90.1294	85.4519	ENSMUSG00000025092	Hspa12a	UTR3
13	42154709	42154981	8.09973	26.4596	22.767	ENSMUSG00000021366	Hivep1	Exon4
1	34589334	34589535	8.09139	29.6682	25.902	ENSMUSG00000045174	Amer3	UTR3
19	53541450	53541585	8.09139	29.6682	25.902	ENSMUSG00000034765	Dusp5	UTR3
4	91253250	91253414	8.09139	29.6682	25.902	ENSMUSG00000008489	Elavl2	LastExon
3	67474771	67474939	8.09139	29.6682	25.902	ENSMUSG00000027774	Gfm1	LastExon
6	60828765	60828927	8.09139	29.6682	25.902	ENSMUSG00000025889	Snca	Exon1
13	21363653	21363998	8.09139	29.6682	25.902	ENSMUSG00000036721	Zscan12	Exon2
4	155156158	155156318	8.089	54.0732	49.8655	ENSMUSG00000029050	Ski	UTR3
19	40550480	40550650	8.08892	55.6936	51.4601	ENSMUSG00000025007	Aldh18a1	UTR3
16	96592656	96593452	8.08892	55.6936	51.4601	ENSMUSG00000050272	Dscam	UTR3
13	116299140	116299572	8.08843	68.2539	63.8424	ENSMUSG00000042258	Isl1	UTR3
7	27749309	27749926	8.08036	39.4522	35.4895	ENSMUSG00000037640	Zfp60	LastExon
13	17772430	17772941	8.07809	30.1694	26.393	ENSMUSG00000041297	Cdk13	Exon2
13	101684688	101685023	8.07596	123.637	118.647	ENSMUSG00000041417	Pik3r1	UTR3
6	25689282	25689609	8.07289	45.361	41.2936	ENSMUSG00000039904	Gpr37	UTR5
7	141475029	141475124	8.07266	35.6375	31.8333	ENSMUSG00000038489	Polr2l	Exon1
13	100124848	100124940	8.07266	35.6375	31.8333	ENSMUSG00000021645	Smn1	UTR5
7	110055166	110055372	8.07099	85.009	80.3899	ENSMUSG00000066232	Ipo7	UTR3
3	55783212	55784569	8.07021	165.522	160.221	ENSMUSG00000056947	Mab21l1	LastExon
3	55783212	55784569	8.07021	165.522	160.221	ENSMUSG00000027799	Nbea	Intron41
7	100837067	100837908	8.06716	140.391	135.272	ENSMUSG00000029461	Fam168a	UTR3
8	102633835	102634618	8.06292	64.3232	59.963	ENSMUSG00000031673	Cdh11	UTR3
4	108513177	108513475	8.06254	49.0917	44.9632	ENSMUSG00000034610	Tut4	Exon14
16	87729419	87729878	8.05707	46.3729	42.2885	ENSMUSG00000025612	Bach1	LastExon
2	72970846	72971300	8.05559	89.1983	84.5304	ENSMUSG00000027109	Sp3	Exon4
18	31722187	31722699	8.04559	42.5556	38.5375	ENSMUSG00000024260	Sap130	LastExon
7	31070519	31070647	8.04448	33.833	29.9791	ENSMUSG00000057092	Fxyd3	UTR3
7	31070519	31070647	8.04448	33.833	29.9791	ENSMUSG00000036560	Lgi4	UTR3
15	27732295	27732938	8.04448	33.833	29.9791	ENSMUSG00000022263	Trio	UTR3
12	91808517	91809465	8.04236	63.1266	58.7826	ENSMUSG00000020964	Sel1l	UTR3
3	87931589	87932184	8.04107	35.4336	31.5476	ENSMUSG00000048039	Isg20l2	Exon2
13	115088521	115088876	8.03207	33.2572	29.4157	ENSMUSG00000114470	Gm49395	UTR3
13	115088521	115088876	8.03207	33.2572	29.4157	ENSMUSG00000042284	Itga1	Intron1
13	115088521	115088876	8.03207	33.2572	29.4157	ENSMUSG00000042275	Pelo	UTR3
8	77596521	77597025	8.02927	55.9293	51.6931	ENSMUSG00000031617	Tmem184c	LastExon
11	32205461	32205571	8.02374	67.3168	62.9168	ENSMUSG00000040767	Snrnp25	UTR5
12	113071620	113071894	8.01214	55.3049	51.0773	ENSMUSG00000021143	Pacs2	LastExon
13	17717964	17718875	8.00929	38.0078	34.072	ENSMUSG00000041297	Cdk13	UTR3
18	37486517	37486977	8.00929	38.0078	34.072	ENSMUSG00000102836	Gm37013	Intron1
18	37486517	37486977	8.00929	38.0078	34.072	ENSMUSG00000103125	Gm37388	Intron1
18	37486517	37486977	8.00929	38.0078	34.072	ENSMUSG00000103458	Gm42416	Intron1
6	134869228	134869481	8.00929	38.0078	34.072	ENSMUSG00000032641	Gpr19	LastExon
8	72815361	72815676	8.00929	38.0078	34.072	ENSMUSG00000004383	Large1	UTR3
18	37486517	37486977	8.00929	38.0078	34.072	ENSMUSG00000046387	Pcdhb17	LastExon
4	148626680	148626781	8.00929	38.0078	34.072	ENSMUSG00000041459	Tardbp	UTR5
18	31888261	31888423	8.00929	38.0078	34.072	ENSMUSG00000024400	Wdr33	Exon16
8	79190270	79190599	8.00929	38.0078	34.072	ENSMUSG00000071064	Zfp827	UTR3
17	30219483	30219857	8.00806	54.7477	50.5284	ENSMUSG00000062202	Btbd9	UTR3
9	94520153	94520615	8.00744	71.5072	67.0506	ENSMUSG00000045414	1190002N15Rik	UTR3
7	119785068	119785532	8.00186	23.5483	19.9243	ENSMUSG00000030935	Acsm3	LastIntron
12	54921039	54921146	8.00186	23.5483	19.9243	ENSMUSG00000035021	Baz1a	Exon16
11	24164097	24164486	8.00186	23.5483	19.9243	ENSMUSG00000000861	Bcl11a	LastExon
11	52027001	52027115	8.00186	23.5483	19.9243	ENSMUSG00000020389	Cdkl3	Exon8
19	46878125	46878247	8.00186	23.5483	19.9243	ENSMUSG00000064105	Cnnm2	UTR3
4	33944840	33944952	8.00186	23.5483	19.9243	ENSMUSG00000044288	Cnr1	LastExon
4	45373956	45374213	8.00186	23.5483	19.9243	ENSMUSG00000035572	Dcaf10	LastExon
1	87237987	87238205	8.00186	23.5483	19.9243	ENSMUSG00000026254	Eif4e2	UTR3
7	119785068	119785532	8.00186	23.5483	19.9243	ENSMUSG00000030929	Eri2	LastExon
19	44036862	44037014	8.00186	23.5483	19.9243	ENSMUSG00000025198	Erlin1	UTR3
15	58181031	58181422	8.00186	23.5483	19.9243	ENSMUSG00000022358	Fbxo32	UTR3
11	53186500	53186766	8.00186	23.5483	19.9243	ENSMUSG00000036264	Fstl4	LastExon
13	42181679	42181835	8.00186	23.5483	19.9243	ENSMUSG00000021366	Hivep1	Exon8
11	59158280	59158478	8.00186	23.5483	19.9243	ENSMUSG00000049287	Iba57	LastExon
5	30951775	30951944	8.00186	23.5483	19.9243	ENSMUSG00000045302	Preb	UTR3
4	155734812	155734925	8.00186	23.5483	19.9243	ENSMUSG00000084845	Tmem240	Exon1
11	75452469	75452773	8.00186	23.5483	19.9243	ENSMUSG00000045374	Wdr81	Exon1
7	7204054	7204188	8.00186	23.5483	19.9243	ENSMUSG00000066838	Zfp772	LastExon
8	84677075	84677226	7.9997	41.3022	37.3057	ENSMUSG00000001910	Nacc1	Exon2
16	36912007	36912894	7.99857	50.9478	46.7896	ENSMUSG00000034243	Golgb1	Exon13
5	4064273	4064602	7.99545	91.5359	86.8433	ENSMUSG00000040407	Akap9	Exon39
2	33731810	33732002	7.99473	54.6805	50.4628	ENSMUSG00000038740	Mvb12b	UTR3
4	143267634	143267891	7.98921	57.9984	53.7291	ENSMUSG00000028583	Pdpn	UTR3
15	80260702	80261136	7.98921	57.9984	53.7291	ENSMUSG00000051518	Rps19bp1	UTR3
9	46281057	46281576	7.98921	57.9984	53.7291	ENSMUSG00000032078	Zpr1	LastExon
1	155862414	155862637	7.98193	41.2336	37.2383	ENSMUSG00000033671	Cep350	Exon34
1	34238510	34238747	7.98193	41.2336	37.2383	ENSMUSG00000026131	Dst	Intron57
9	50607044	50607197	7.98193	41.2336	37.2383	ENSMUSG00000059820	Nkapd1	UTR3
X	100816556	100816746	7.98028	78.9602	74.4123	ENSMUSG00000000881	Dlg3	LastExon
3	129800433	129800583	7.97895	24.559	20.91	ENSMUSG00000093865	Lrit3	Exon2
7	19356405	19356826	7.97326	44.4097	40.3586	ENSMUSG00000047649	Cd3eap	UTR3
7	19356405	19356826	7.97326	44.4097	40.3586	ENSMUSG00000003549	Ercc1	Intergenic
13	97245511	97246670	7.96981	68.0532	63.6438	ENSMUSG00000041773	Enc1	Exon2
8	92360381	92360991	7.96337	65.8755	61.4945	ENSMUSG00000031737	Irx5	Exon3
19	40845894	40846447	7.96299	24.5208	20.8736	ENSMUSG00000025010	Ccnj	LastExon
4	11583934	11584137	7.96299	24.5208	20.8736	ENSMUSG00000094595	Fsbp	LastExon
17	24179104	24179328	7.96299	24.5208	20.8736	ENSMUSG00000107169	Gm43796	Intron1
11	100463424	100463669	7.96299	24.5208	20.8736	ENSMUSG00000048732	Klhl11	LastExon
11	6291594	6291689	7.96299	24.5208	20.8736	ENSMUSG00000020456	Ogdh	UTR5
4	11583934	11584137	7.96299	24.5208	20.8736	ENSMUSG00000078773	Rad54b	Intron3
17	24179104	24179328	7.96299	24.5208	20.8736	ENSMUSG00000036473	Tbc1d24	UTR3
7	83882103	83882281	7.96003	45.4234	41.3548	ENSMUSG00000070462	Tlnrd1	UTR3
1	136627553	136627921	7.96003	45.4234	41.3548	ENSMUSG00000041483	Zfp281	LastExon
7	96906055	96906651	7.95792	149.29	144.103	ENSMUSG00000048078	Tenm4	LastExon
7	105755027	105755716	7.95481	29.8192	26.0492	ENSMUSG00000036862	Dchs1	LastExon
3	9692501	9692723	7.95481	29.8192	26.0492	ENSMUSG00000027508	Pag1	UTR3
8	47710980	47711479	7.95358	33.5449	29.698	ENSMUSG00000038069	Cdkn2aip	UTR3
11	102799734	102800870	7.94679	70.5757	66.132	ENSMUSG00000034520	Gjc1	Intergenic
11	118410944	118411262	7.94212	49.6144	45.4764	ENSMUSG00000025575	Cant1	Exon2
7	45825414	45826045	7.94212	49.6144	45.4764	ENSMUSG00000053801	Grwd1	UTR3
10	43021148	43021368	7.94077	94.8063	90.0766	ENSMUSG00000038248	Sobp	Exon6
15	84940364	84940527	7.93977	41.6037	37.6027	ENSMUSG00000016619	Nup50	UTR3
8	71968303	71968664	7.9379	31.3665	27.5641	ENSMUSG00000052446	Zfp961	LastExon
10	58478903	58479056	7.93598	73.8414	69.3566	ENSMUSG00000003226	Ranbp2	Exon20
5	81794311	81795227	7.93557	23.9252	20.2919	ENSMUSG00000037605	Adgrl3	UTR3
12	69198208	69198452	7.93557	23.9252	20.2919	ENSMUSG00000020973	Dnaaf2	Exon1
12	69198208	69198452	7.93557	23.9252	20.2919	ENSMUSG00000113786	Gm49384	Intron2
10	43511992	43512176	7.92966	28.6849	24.9413	ENSMUSG00000038214	Bend3	LastExon
9	15332311	15332409	7.92966	28.6849	24.9413	ENSMUSG00000046111	Cep295	Exon15
5	107909385	107909898	7.92966	28.6849	24.9413	ENSMUSG00000029270	Fam69a	UTR3
3	76707549	76707718	7.92966	28.6849	24.9413	ENSMUSG00000034098	Fstl5	LastExon
17	35123187	35123494	7.92966	28.6849	24.9413	ENSMUSG00000092417	Gpank1	Exon2
4	94965201	94965521	7.92966	28.6849	24.9413	ENSMUSG00000062627	Mysm1	Exon8
9	15007855	15007981	7.92966	28.6849	24.9413	ENSMUSG00000031934	Panx1	Exon4
19	5111136	5111231	7.92867	43.1586	39.1299	ENSMUSG00000024862	Klc2	Exon9
9	57604760	57604855	7.92719	53.8062	49.6019	ENSMUSG00000039714	Cplx3	Intron1
4	21678108	21678794	7.92543	176.797	171.426	ENSMUSG00000040478	Prdm13	LastExon
5	142666867	142667091	7.91842	44.7138	40.6576	ENSMUSG00000029578	Wipi2	LastExon
12	81314564	81315270	7.91777	82.2281	77.6413	ENSMUSG00000079055	Slc8a3	Exon2
16	75758096	75758332	7.91456	57.0642	52.8092	ENSMUSG00000032932	Hspa13	LastExon
1	43554175	43554419	7.91456	57.0642	52.8092	ENSMUSG00000066877	Nck2	Exon4
8	119941326	119942088	7.9068	78.9556	74.4079	ENSMUSG00000092329	Gm20388	Intron1
8	119941326	119942088	7.9068	78.9556	74.4079	ENSMUSG00000031826	Usp10	Intergenic
2	118792919	118793250	7.90585	32.862	29.0287	ENSMUSG00000040035	Disp2	UTR3
10	96026552	96026766	7.90585	32.862	29.0287	ENSMUSG00000036499	Eea1	Exon19
14	57699410	57699583	7.90585	32.862	29.0287	ENSMUSG00000114942	Gm49361	Exon4
14	57699410	57699583	7.90585	32.862	29.0287	ENSMUSG00000021959	Lats2	Exon4
8	25983191	25983444	7.90585	32.862	29.0287	ENSMUSG00000037251	Pomk	LastExon
14	104479196	104479589	7.90585	32.862	29.0287	ENSMUSG00000022120	Rnf219	LastExon
10	68096903	68097320	7.89865	27.0105	23.3041	ENSMUSG00000019947	Arid5b	LastExon
13	51702561	51703301	7.89625	44.0889	40.0437	ENSMUSG00000021451	Sema4d	UTR3
3	19227488	19227843	7.89435	65.4534	61.0769	ENSMUSG00000069094	Pde7a	UTR3
5	49960164	49960900	7.8922	66.5019	62.112	ENSMUSG00000029090	Adgra3	UTR3
7	4639904	4640167	7.89085	98.0806	93.3147	ENSMUSG00000052296	Ppp6r1	Intron12
13	103743326	103743750	7.88842	54.6724	50.4547	ENSMUSG00000032621	Srek1	UTR3
11	120011745	120011941	7.88799	37.0459	33.1286	ENSMUSG00000025375	Aatk	Exon11
19	6261599	6261858	7.88799	37.0459	33.1286	ENSMUSG00000024773	Atg2a	LastExon
8	70133328	70133514	7.88799	37.0459	33.1286	ENSMUSG00000071078	Nr2c2ap	LastExon
6	71974711	71974855	7.88799	37.0459	33.1286	ENSMUSG00000049553	Polr1a	Exon30
8	70133328	70133514	7.88799	37.0459	33.1286	ENSMUSG00000036120	Rfxank	UTR3
14	87506018	87506382	7.88799	37.0459	33.1286	ENSMUSG00000022019	Tdrd3	Exon11
X	94636646	94637250	7.87919	33.8369	29.983	ENSMUSG00000071723	Gspt2	LastExon
11	113688628	113688854	7.87411	40.2846	36.3062	ENSMUSG00000041623	D11Wsu47e	Exon2
9	37222542	37222877	7.86965	31.3569	27.6369	ENSMUSG00000032121	Tmem218	LastExon
4	132329401	132329513	7.86965	31.3569	27.6369	ENSMUSG00000028898	Trnau1ap	Exon1
6	8592956	8593406	7.8667	81.3069	76.7305	ENSMUSG00000029638	Glcci1	LastExon
6	83109694	83109816	7.8667	81.3069	76.7305	ENSMUSG00000079511	Gm42688	UTR3
6	8592956	8593406	7.8667	81.3069	76.7305	ENSMUSG00000107705	Gm45062	UTR3
6	83109694	83109816	7.8667	81.3069	76.7305	ENSMUSG00000030037	Mrpl53	LastExon
16	36918017	36918668	7.86607	42.9029	38.878	ENSMUSG00000034243	Golgb1	Exon14
15	101210935	101211341	7.864	55.6058	51.3734	ENSMUSG00000000532	Acvr1b	UTR3
13	52967379	52967883	7.86299	44.4793	40.4267	ENSMUSG00000056749	Nfil3	UTR3
7	37567887	37568510	7.86299	44.4793	40.4267	ENSMUSG00000043456	Zfp536	Exon4
11	3526212	3526422	7.85908	26.3787	22.6879	ENSMUSG00000020439	Smtn	Intron13
5	137032062	137032333	7.85908	26.3787	22.6879	ENSMUSG00000037428	Vgf	LastExon
6	13870457	13870618	7.8539	48.6743	44.5523	ENSMUSG00000052419	2610001J05Rik	UTR3
2	125579523	125579931	7.8539	48.6743	44.5523	ENSMUSG00000068394	Cep152	Exon21
8	94864917	94865190	7.8539	48.6743	44.5523	ENSMUSG00000040631	Dok4	UTR3
5	108269472	108269779	7.8539	48.6743	44.5523	ENSMUSG00000029265	Dr1	UTR5
8	94864917	94865190	7.8539	48.6743	44.5523	ENSMUSG00000031783	Polr2c	Intron8
2	156097791	156098348	7.85244	57.7887	53.5223	ENSMUSG00000074643	Cpne1	Intron2
2	156097791	156098348	7.85244	57.7887	53.5223	ENSMUSG00000098950	Gm28036	Exon3
2	156097791	156098348	7.85244	57.7887	53.5223	ENSMUSG00000089824	Rbm12	LastExon
9	32256945	32257129	7.84827	33.2083	29.3675	ENSMUSG00000041444	Arhgap32	Exon21
3	87536273	87536508	7.8464	27.9264	24.1991	ENSMUSG00000003382	Etv3	LastExon
6	116042910	116043446	7.84633	52.8693	48.6795	ENSMUSG00000030126	Tmcc1	Exon4
5	38673402	38673617	7.84633	52.8693	48.6795	ENSMUSG00000046572	Zfp518b	LastExon
9	44134667	44134759	7.84042	26.1483	22.5385	ENSMUSG00000032135	Mcam	UTR5
5	110755443	110756088	7.83992	56.1343	51.894	ENSMUSG00000029505	Ep400	Exon2
11	117722218	117723488	7.83736	62.4612	58.1267	ENSMUSG00000025571	Tnrc6c	Exon5
18	36791195	36791642	7.83607	30.5326	26.7482	ENSMUSG00000019143	Hars2	UTR3
1	133659399	133659935	7.83442	60.331	56.0263	ENSMUSG00000094410	Gm38394	Exon1
1	133659399	133659935	7.83442	60.331	56.0263	ENSMUSG00000102049	Zbed6	LastExon
1	133659399	133659935	7.83442	60.331	56.0263	ENSMUSG00000102976	Zc3h11a	Intron1
1	133659399	133659935	7.83442	60.331	56.0263	ENSMUSG00000116275	Zc3h11a	Intron1
11	88193355	88193791	7.83094	121.409	116.437	ENSMUSG00000018378	Cuedc1	UTR3
17	24185489	24185650	7.83032	36.3143	32.4112	ENSMUSG00000107169	Gm43796	Exon1
17	24185489	24185650	7.83032	36.3143	32.4112	ENSMUSG00000036473	Tbc1d24	Exon3
18	31910312	31910670	7.82966	64.5271	60.1635	ENSMUSG00000044982	Sft2d3	UTR3
4	86576007	86576278	7.82655	128.883	123.85	ENSMUSG00000070934	Rraga	LastExon
15	82851560	82851922	7.82413	29.9705	26.1981	ENSMUSG00000041852	Tcf20	Exon2
3	107278994	107279100	7.82221	62.0872	57.8757	ENSMUSG00000087260	Lamtor5	Exon1
2	165812363	165812822	7.82182	71.9978	67.5348	ENSMUSG00000039671	Zmynd8	Exon15
11	29503905	29504306	7.81855	76.1935	71.6796	ENSMUSG00000032740	Ccdc88a	Exon30
16	96127595	96127711	7.81563	80.3886	75.8237	ENSMUSG00000040681	Hmgn1	Exon1
9	21230235	21230830	7.81563	80.3886	75.8237	ENSMUSG00000003308	Keap1	UTR3
5	88640561	88640829	7.81551	38.4758	34.5325	ENSMUSG00000029291	Rufy3	LastExon
2	24791751	24791980	7.80934	46.8864	42.7942	ENSMUSG00000036893	Ehmt1	UTR3
14	45330814	45330978	7.80859	34.133	30.2732	ENSMUSG00000021832	Psmc6	Exon2
5	125455563	125455686	7.79684	22.551	18.9531	ENSMUSG00000037905	Bri3bp	UTR3
15	13034400	13034569	7.79684	22.551	18.9531	ENSMUSG00000039385	Cdh6	LastExon
4	152382317	152382412	7.79684	22.551	18.9531	ENSMUSG00000005045	Chd5	Exon34
3	96221172	96221538	7.79684	22.551	18.9531	ENSMUSG00000068854	Hist2h2be	LastExon
2	160365143	160365631	7.79684	22.551	18.9531	ENSMUSG00000074622	Mafb	UTR3
11	101077080	101077502	7.79684	22.551	18.9531	ENSMUSG00000001751	Naglu	LastExon
4	134278311	134279123	7.79684	22.551	18.9531	ENSMUSG00000050890	Pdik1l	UTR3
2	16751302	16751646	7.79684	22.551	18.9531	ENSMUSG00000026748	Plxdc2	LastExon
10	80335252	80335694	7.79684	22.551	18.9531	ENSMUSG00000035504	Reep6	LastExon
8	22482881	22482999	7.79684	22.551	18.9531	ENSMUSG00000037656	Slc20a2	Intron1
3	133467541	133467737	7.79684	22.551	18.9531	ENSMUSG00000040943	Tet2	LastExon
17	81001084	81001355	7.79684	22.551	18.9531	ENSMUSG00000024245	Tmem178	UTR3
17	21722130	21722444	7.79684	22.551	18.9531	ENSMUSG00000067928	Zfp760	LastExon
11	108949456	108949652	7.76892	23.5306	19.9087	ENSMUSG00000000142	Axin2	UTR3
7	62418778	62419477	7.76892	23.5306	19.9087	ENSMUSG00000070527	Mkrn3	LastExon
8	61073470	61073592	7.76892	23.5306	19.9087	ENSMUSG00000031644	Nek1	Exon21
12	118238124	118238336	7.76892	23.5306	19.9087	ENSMUSG00000025323	Sp4	UTR3
16	90751888	90752013	7.76892	23.5306	19.9087	ENSMUSG00000039929	Urb1	UTR3
7	12970464	12970767	7.76892	23.5306	19.9087	ENSMUSG00000004500	Zfp324	UTR3
7	29933823	29934165	7.76892	23.5306	19.9087	ENSMUSG00000059975	Zfp74	UTR3
16	34723165	34723481	7.76793	27.7107	23.9876	ENSMUSG00000022833	Ccdc14	LastExon
11	76782121	76782288	7.76793	27.7107	23.9876	ENSMUSG00000020841	Cpd	UTR3
1	165321456	165321983	7.76793	27.7107	23.9876	ENSMUSG00000040836	Gpr161	LastExon
6	107569283	107569562	7.76793	27.7107	23.9876	ENSMUSG00000034648	Lrrn1	LastExon
4	143417398	143417575	7.76793	27.7107	23.9876	ENSMUSG00000046862	Pramef8	Exon4
7	19140882	19141135	7.76793	27.7107	23.9876	ENSMUSG00000030407	Qpctl	UTR3
5	25349848	25349949	7.76723	31.8989	28.0853	ENSMUSG00000038056	Kmt2c	Exon24
7	3662780	3662884	7.76723	31.8989	28.0853	ENSMUSG00000078813	Leng1	Exon3
18	38198443	38198594	7.76723	31.8989	28.0853	ENSMUSG00000051375	Pcdh1	Intron2
7	30539297	30539427	7.76723	31.8989	28.0853	ENSMUSG00000036864	Proser3	UTR3
14	8090005	8090497	7.76723	31.8989	28.0853	ENSMUSG00000023156	Rpp14	UTR3
17	51782681	51782879	7.76723	31.8989	28.0853	ENSMUSG00000023927	Satb1	Exon7
11	20020848	20021229	7.76723	31.8989	28.0853	ENSMUSG00000045671	Spred2	LastExon
4	11519100	11519280	7.76723	31.8989	28.0853	ENSMUSG00000040720	Virma	Exon10
5	38674441	38674654	7.76723	31.8989	28.0853	ENSMUSG00000046572	Zfp518b	LastExon
5	110252706	110253152	7.7667	36.0908	32.1923	ENSMUSG00000029501	Ankle2	Exon11
8	107048797	107049037	7.7667	36.0908	32.1923	ENSMUSG00000031916	Cog8	UTR3
10	117376837	117376935	7.7667	36.0908	32.1923	ENSMUSG00000055531	Cpsf6	Exon1
7	27748148	27748504	7.7667	36.0908	32.1923	ENSMUSG00000037640	Zfp60	LastExon
11	76212739	76213010	7.76629	39.3418	35.3818	ENSMUSG00000069808	Fam57a	LastExon
11	76212739	76213010	7.76629	39.3418	35.3818	ENSMUSG00000049396	Gemin4	LastExon
11	76212739	76213010	7.76629	39.3418	35.3818	ENSMUSG00000017286	Glod4	UTR3
9	107538155	107538496	7.76629	39.3418	35.3818	ENSMUSG00000010045	Tmem115	UTR3
2	112266320	112266528	7.76596	43.5407	39.505	ENSMUSG00000096764	Gm21985	UTR5
8	109940367	109941138	7.76596	43.5407	39.505	ENSMUSG00000031732	Phlpp2	LastExon
X	38631609	38631925	7.76569	47.7391	43.6333	ENSMUSG00000048970	C1galt1c1	LastExon
18	64516435	64516541	7.76569	47.7391	43.6333	ENSMUSG00000024587	Nars	Exon1
11	109650511	109650617	7.76546	51.937	47.7623	ENSMUSG00000020612	Prkar1a	UTR5
6	4642098	4642318	7.76527	55.2086	50.9824	ENSMUSG00000015189	Casd1	LastExon
15	72806634	72809441	7.76464	75.2774	70.7747	ENSMUSG00000047921	Trappc9	LastIntron
17	25566848	25567146	7.76389	135.455	130.372	ENSMUSG00000024176	Sox8	UTR3
13	46752095	46752499	7.76191	38.1706	34.2324	ENSMUSG00000021375	Kif13a	Exon37
7	75611002	75611470	7.7615	28.2161	24.4826	ENSMUSG00000066406	Akap13	Exon7
4	107139139	107139718	7.75039	31.3228	27.5211	ENSMUSG00000028619	Tceanc2	UTR3
11	75266232	75266779	7.72288	27.5862	23.8683	ENSMUSG00000045287	Rtn4rl1	UTR3
5	30953860	30954098	7.71921	29.1398	25.3858	ENSMUSG00000045302	Preb	UTR3
2	160949269	160950158	7.71596	82.7566	78.1634	ENSMUSG00000057133	Chd6	UTR3
7	15971734	15972537	7.71594	30.6944	26.9066	ENSMUSG00000070808	Bicra	LastExon
11	8433815	8434481	7.71073	74.3644	69.8733	ENSMUSG00000020422	Tns3	UTR3
5	143244917	143245969	7.71073	74.3644	69.8733	ENSMUSG00000029587	Zfp12	LastExon
10	40479768	40480025	7.70803	35.3621	31.4773	ENSMUSG00000038481	Cdk19	LastExon
17	3197775	3198204	7.70766	71.0809	66.6299	ENSMUSG00000046201	Scaf8	LastExon
11	121306994	121307443	7.70028	62.6857	58.3476	ENSMUSG00000039275	Foxk2	UTR3
10	7906212	7906335	7.6975	43.7716	39.732	ENSMUSG00000015755	Tab2	UTR3
4	155221577	155221942	7.6958	58.4869	54.2099	ENSMUSG00000029050	Ski	Exon1
1	161818288	161818793	7.69063	54.2871	50.0753	ENSMUSG00000040297	Suco	UTR3
9	45928524	45929298	7.6883	22.3017	18.7104	ENSMUSG00000035382	Pcsk7	UTR3
2	152687279	152687571	7.68629	23.8513	20.2199	ENSMUSG00000019188	H13	Intron4
2	152687279	152687571	7.68629	23.8513	20.2199	ENSMUSG00000042814	Mcts2	LastExon
18	80127957	80128115	7.6846	51.0093	46.8493	ENSMUSG00000053950	Adnp2	LastExon
17	23576890	23577140	7.6846	51.0093	46.8493	ENSMUSG00000062012	Zfp13	LastExon
6	119350772	119351016	7.68455	25.403	21.735	ENSMUSG00000041460	Cacna2d4	UTR3
2	79644960	79645077	7.68455	25.403	21.735	ENSMUSG00000027007	Ssfa2	Exon8
17	35220660	35220847	7.68336	97.7211	92.9588	ENSMUSG00000081650	Gm16181	Intergenic
17	35220660	35220847	7.68336	97.7211	92.9588	ENSMUSG00000042419	Nfkbil1	LastExon
9	109058250	109058506	7.6817	28.5108	24.7721	ENSMUSG00000025646	Atrip	UTR3
9	109058250	109058506	7.6817	28.5108	24.7721	ENSMUSG00000049734	Trex1	LastExon
19	8927010	8927156	7.68067	140.233	135.115	ENSMUSG00000071649	B3gat3	UTR3
9	119239912	119240403	7.67851	33.1788	29.3385	ENSMUSG00000036737	Oxsr1	UTR3
11	97500401	97500558	7.67766	34.7358	30.8636	ENSMUSG00000049807	Arhgap23	LastExon
3	41613220	41613982	7.67747	46.809	42.7182	ENSMUSG00000025764	Jade1	LastExon
5	147078552	147078960	7.67747	46.809	42.7182	ENSMUSG00000029642	Polr1d	Intron1
1	89145699	89145865	7.67747	46.809	42.7182	ENSMUSG00000036206	Sh3bp4	Exon4
16	94691652	94692438	7.67617	37.8506	33.9178	ENSMUSG00000022897	Dyrk1a	LastExon
14	20736083	20736620	7.67255	47.8271	43.7194	ENSMUSG00000021820	Camk2g	UTR3
7	19724217	19724676	7.67255	47.8271	43.7194	ENSMUSG00000062300	Nectin2	Intron5
4	107414082	107414238	7.66892	42.6077	38.5889	ENSMUSG00000028614	Ndc1	LastExon
10	105370039	105370490	7.66892	42.6077	38.5889	ENSMUSG00000036019	Tmtc2	Exon3
7	16434146	16434828	7.66862	70.2914	65.8513	ENSMUSG00000059273	Zc3h4	LastExon
11	80031930	80032237	7.66744	81.8475	77.2644	ENSMUSG00000017548	Suz12	LastExon
17	65926275	65926378	7.65847	38.4053	34.4632	ENSMUSG00000024098	Twsg1	UTR3
6	34838578	34838670	7.65374	25.163	21.5754	ENSMUSG00000038836	Agbl3	Intron16
15	66969548	66969649	7.65374	25.163	21.5754	ENSMUSG00000005125	Ndrg1	Exon1
9	115198419	115198511	7.65374	25.163	21.5754	ENSMUSG00000040875	Osbpl10	Intron3
3	95011880	95012392	7.65261	55.6424	51.4096	ENSMUSG00000019338	Zfp687	Exon2
11	3649591	3649814	7.65058	70.1673	65.7289	ENSMUSG00000034543	Morc2a	UTR5
1	37430167	37430283	7.64654	34.1097	30.251	ENSMUSG00000026111	Unc50	UTR5
2	128611117	128611702	7.6454	35.1427	31.2639	ENSMUSG00000014355	Anapc1	UTR3
8	3153699	3154116	7.6454	35.1427	31.2639	ENSMUSG00000005534	Insr	UTR3
5	123454028	123454157	7.6454	35.1427	31.2639	ENSMUSG00000038342	Mlxip	UTR3
1	79777955	79778116	7.6454	35.1427	31.2639	ENSMUSG00000026248	Mrpl44	Exon2
8	80710575	80710674	7.6454	35.1427	31.2639	ENSMUSG00000031715	Smarca5	Exon16
19	42033726	42034006	7.6454	35.1427	31.2639	ENSMUSG00000025171	Ubtd1	LastExon
17	35989197	35989312	7.64189	26.3265	22.6369	ENSMUSG00000024429	Gnl1	UTR3
14	25699527	25699676	7.64189	26.3265	22.6369	ENSMUSG00000021868	Ppif	LastExon
2	3464268	3464756	7.64057	24.7722	21.1183	ENSMUSG00000026646	Suv39h2	Exon3
7	64871979	64872437	7.63646	59.702	55.4068	ENSMUSG00000030518	Fam189a1	Intron2
7	64871979	64872437	7.63646	59.702	55.4068	ENSMUSG00000070520	Nsmce3	UTR3
3	87977789	87978589	7.6363	97.7906	93.028	ENSMUSG00000004891	Nes	LastExon
2	91620077	91620448	7.63559	61.7707	57.4456	ENSMUSG00000040549	Ckap5	LastExon
7	7283406	7283522	7.63278	52.8227	48.6342	ENSMUSG00000000605	Clcn4	UTR3
8	11635668	11635767	7.6286	30.9436	27.1502	ENSMUSG00000031508	Ankrd10	UTR5
7	137196139	137196282	7.6286	30.9436	27.1502	ENSMUSG00000010476	Ebf3	UTR3
10	75015620	75015877	7.6286	30.9436	27.1502	ENSMUSG00000040009	Gnaz	UTR3
10	81325934	81326196	7.62657	43.4648	39.4314	ENSMUSG00000034889	Cactin	LastExon
12	25094198	25094530	7.62649	57.5709	53.3086	ENSMUSG00000020644	Id2	UTR3
12	104702554	104703074	7.62526	41.9048	37.898	ENSMUSG00000041415	Dicer1	Exon21
17	35220276	35220431	7.61485	103.405	98.5853	ENSMUSG00000042419	Nfkbil1	UTR3
7	80115176	80115281	7.61339	51.2464	47.1855	ENSMUSG00000030541	Idh2	Exon1
7	44829584	44830638	7.60644	145.928	140.767	ENSMUSG00000074141	Il4i1	Intron1
7	44829584	44830638	7.60644	145.928	140.767	ENSMUSG00000109511	Nup62	LastExon
11	107132019	107132148	7.6062	26.7458	23.0458	ENSMUSG00000040481	Bptf	UTR5
14	56552073	56552463	7.6062	26.7458	23.0458	ENSMUSG00000064128	Cenpj	Exon8
14	79769145	79769267	7.6062	26.7458	23.0458	ENSMUSG00000036422	Pcdh8	LastExon
2	27762801	27762913	7.6032	27.253	23.5416	ENSMUSG00000015846	Rxra	UTR3
10	117073725	117074835	7.6025	42.8433	38.82	ENSMUSG00000020170	Frs2	UTR3
5	149759494	149759621	7.59552	91.7225	87.0275	ENSMUSG00000051950	B3glct	LastExon
9	21957248	21957439	7.59504	24.1414	20.5043	ENSMUSG00000051238	Swsap1	LastExon
X	105121896	105122506	7.59349	69.257	64.8313	ENSMUSG00000031227	Magee1	LastExon
1	63592668	63593198	7.59183	21.5654	17.9926	ENSMUSG00000025964	Adam23	UTR3
1	59163968	59164189	7.59183	21.5654	17.9926	ENSMUSG00000026024	Als2	UTR3
18	6111683	6112376	7.59183	21.5654	17.9926	ENSMUSG00000041225	Arhgap12	Exon1
15	89475748	89475928	7.59183	21.5654	17.9926	ENSMUSG00000022620	Arsa	UTR5
4	70222630	70222773	7.59183	21.5654	17.9926	ENSMUSG00000039298	Cdk5rap2	UTR3
4	128565766	128566089	7.59183	21.5654	17.9926	ENSMUSG00000028804	Csmd2	UTR3
7	133014603	133014815	7.59183	21.5654	17.9926	ENSMUSG00000030970	Ctbp2	Exon1
12	44207312	44207411	7.59183	21.5654	17.9926	ENSMUSG00000014905	Dnajb9	LastExon
18	37145563	37145966	7.59183	21.5654	17.9926	ENSMUSG00000102836	Gm37013	Intron1
18	37145563	37145966	7.59183	21.5654	17.9926	ENSMUSG00000103125	Gm37388	Intron1
18	37145563	37145966	7.59183	21.5654	17.9926	ENSMUSG00000103458	Gm42416	Intron1
6	126737386	126737877	7.59183	21.5654	17.9926	ENSMUSG00000038077	Kcna6	UTR3
10	100096196	100096739	7.59183	21.5654	17.9926	ENSMUSG00000019966	Kitl	UTR3
8	60671336	60671931	7.59183	21.5654	17.9926	ENSMUSG00000031647	Mfap3l	LastExon
19	60757012	60757300	7.59183	21.5654	17.9926	ENSMUSG00000072437	Nanos1	LastExon
3	49744559	49744658	7.59183	21.5654	17.9926	ENSMUSG00000037892	Pcdh18	UTR3
18	37145563	37145966	7.59183	21.5654	17.9926	ENSMUSG00000103442	Pcdha1	Intron1
18	37145563	37145966	7.59183	21.5654	17.9926	ENSMUSG00000007440	Pcdha11	Intron1
18	37145563	37145966	7.59183	21.5654	17.9926	ENSMUSG00000102206	Pcdha11	Intron1
18	37145563	37145966	7.59183	21.5654	17.9926	ENSMUSG00000103310	Pcdha12	Intron1
18	37145563	37145966	7.59183	21.5654	17.9926	ENSMUSG00000104148	Pcdha2	Intron1
18	37145563	37145966	7.59183	21.5654	17.9926	ENSMUSG00000102312	Pcdha3	Intron1
18	37145563	37145966	7.59183	21.5654	17.9926	ENSMUSG00000104252	Pcdha4	Intron1
18	37145563	37145966	7.59183	21.5654	17.9926	ENSMUSG00000103092	Pcdha5	Intron1
18	37145563	37145966	7.59183	21.5654	17.9926	ENSMUSG00000103707	Pcdha6	Intron1
18	37145563	37145966	7.59183	21.5654	17.9926	ENSMUSG00000104318	Pcdha7	Intron1
18	37145563	37145966	7.59183	21.5654	17.9926	ENSMUSG00000103800	Pcdha8	Intron1
18	37145563	37145966	7.59183	21.5654	17.9926	ENSMUSG00000103770	Pcdha9	Intron1
18	37145563	37145966	7.59183	21.5654	17.9926	ENSMUSG00000103255	Pcdhac1	Intron1
18	37145563	37145966	7.59183	21.5654	17.9926	ENSMUSG00000102697	Pcdhac2	Exon1
15	66609766	66609861	7.59183	21.5654	17.9926	ENSMUSG00000072501	Phf20l1	Intron9
5	52643853	52643972	7.59183	21.5654	17.9926	ENSMUSG00000029173	Sepsecs	LastExon
18	24589751	24589846	7.59183	21.5654	17.9926	ENSMUSG00000024270	Slc39a6	Exon6
5	53836560	53836655	7.59183	21.5654	17.9926	ENSMUSG00000039178	Tbc1d19	Exon6
1	155241447	155241715	7.59002	22.5876	18.9885	ENSMUSG00000033722	BC034090	Exon2
12	82341830	82342285	7.58926	45.8841	41.8085	ENSMUSG00000042700	Sipa1l1	Exon4
6	30213983	30214295	7.58926	45.8841	41.8085	ENSMUSG00000039159	Ube2h	UTR3
1	88277242	88277537	7.58832	99.3911	94.6109	ENSMUSG00000044783	Hjurp	Exon1
5	135181205	135181395	7.5829	65.0586	60.6883	ENSMUSG00000029681	Bcl7b	UTR3
4	123247277	123248084	7.57615	63.4687	59.1195	ENSMUSG00000032744	Heyl	UTR3
2	32213967	32214842	7.57614	121.678	116.705	ENSMUSG00000039262	Prrc2b	Exon16
7	82867530	82867872	7.57562	52.5231	48.3391	ENSMUSG00000057706	Mex3b	UTR5
9	106838260	106838525	7.57484	22.5515	18.9532	ENSMUSG00000040325	Dcaf1	Exon6
13	97126530	97126953	7.57484	22.5515	18.9532	ENSMUSG00000041817	Fam169a	LastExon
2	28826196	28826708	7.57484	22.5515	18.9532	ENSMUSG00000035666	Gtf3c4	UTR3
5	100444000	100444139	7.57484	22.5515	18.9532	ENSMUSG00000035310	Lin54	UTR3
10	61580269	61580408	7.57484	22.5515	18.9532	ENSMUSG00000037151	Lrrc20	LastExon
14	64028024	64028340	7.57484	22.5515	18.9532	ENSMUSG00000046049	Rp1l1	LastExon
12	91830756	91830890	7.57484	22.5515	18.9532	ENSMUSG00000020964	Sel1l	Exon6
11	84911269	84911510	7.57484	22.5515	18.9532	ENSMUSG00000020526	Znhit3	UTR3
4	134926965	134927247	7.57378	179.17	173.784	ENSMUSG00000037266	Rsrp1	LastExon
10	81461417	81461734	7.57188	41.6804	37.6781	ENSMUSG00000034818	Celf5	UTR3
8	123269010	123269166	7.57188	41.6804	37.6781	ENSMUSG00000032815	Fanca	Intron40
8	123269010	123269166	7.57188	41.6804	37.6781	ENSMUSG00000092329	Gm20388	Intron1
7	83883404	83883679	7.57188	41.6804	37.6781	ENSMUSG00000070462	Tlnrd1	UTR5
8	123269010	123269166	7.57188	41.6804	37.6781	ENSMUSG00000001065	Zfp276	LastExon
11	74817223	74817638	7.57126	39.1004	35.1446	ENSMUSG00000010554	Mettl16	LastExon
1	90612218	90612975	7.57089	60.8593	56.5476	ENSMUSG00000034432	Cops8	LastExon
17	46413166	46413409	7.56794	28.1822	24.4493	ENSMUSG00000015597	Zfp318	LastExon
14	21052591	21052684	7.56697	29.4289	25.7478	ENSMUSG00000039197	Adk	Exon1
7	48871054	48871229	7.56401	46.2827	42.2002	ENSMUSG00000046179	E2f8	Exon10
7	130910958	130911345	7.56145	185.769	180.344	ENSMUSG00000040268	Plekha1	UTR3
5	20896096	20896695	7.55717	56.659	52.4101	ENSMUSG00000039968	Rsbn1l	UTR3
3	104769803	104770741	7.55545	25.0671	21.4071	ENSMUSG00000055865	Fam19a3	UTR3
2	165379864	165380278	7.55545	25.0671	21.4071	ENSMUSG00000017667	Zfp334	UTR3
2	28452072	28453394	7.55388	33.7918	29.9392	ENSMUSG00000035829	Ppp1r26	LastExon
11	20826001	20826492	7.553	41.6008	37.5998	ENSMUSG00000042363	Lgalsl	UTR3
1	78666203	78666762	7.55065	37.475	33.5499	ENSMUSG00000032883	Acsl3	Intron2
X	134758549	134758869	7.55065	37.475	33.5499	ENSMUSG00000049047	Armcx3	UTR5
8	13256488	13256870	7.55065	37.475	33.5499	ENSMUSG00000038506	Dcun1d2	UTR3
18	43581835	43582250	7.55065	37.475	33.5499	ENSMUSG00000024502	Jakmip2	Exon3
1	78666203	78666762	7.55065	37.475	33.5499	ENSMUSG00000079470	Utp14b	LastExon
14	75343624	75343782	7.55065	37.475	33.5499	ENSMUSG00000022000	Zc3h13	LastExon
7	110308639	110309218	7.549	71.6443	67.1861	ENSMUSG00000038371	Sbf2	UTR3
10	79675645	79676088	7.549	71.6443	67.1861	ENSMUSG00000020308	Tpgs1	LastExon
9	107570215	107570864	7.54415	38.4785	34.5352	ENSMUSG00000010047	Hyal2	LastExon
2	148675322	148675897	7.5438	86.6295	81.9926	ENSMUSG00000036992	Nxt1	UTR5
6	83369069	83369459	7.53919	52.8449	48.656	ENSMUSG00000034832	Tet3	LastExon
8	127610656	127611127	7.53909	21.9557	18.373	ENSMUSG00000025812	Pard3	LastExon
7	12971754	12972148	7.53909	21.9557	18.373	ENSMUSG00000004500	Zfp324	UTR3
2	59942762	59943046	7.53641	68.35	63.9372	ENSMUSG00000026987	Baz2b	Intron13
15	39871984	39872724	7.53641	68.35	63.9372	ENSMUSG00000022305	Lrp12	UTR3
7	27580625	27580871	7.53569	29.1135	25.3601	ENSMUSG00000049643	2310022A10Rik	LastExon
19	4787643	4787984	7.53372	36.2872	32.3847	ENSMUSG00000096370	Gm21992	LastIntron
1	185464080	185464907	7.53372	36.2872	32.3847	ENSMUSG00000026614	Slc30a10	LastExon
4	121147562	121147771	7.52865	128.276	123.247	ENSMUSG00000049878	Rlf	LastExon
8	122572769	122572988	7.52816	27.5544	23.8374	ENSMUSG00000006585	Cdt1	LastExon
8	122572769	122572988	7.52816	27.5544	23.8374	ENSMUSG00000092329	Gm20388	Intron1
17	65654199	65654326	7.52536	31.7953	28.0663	ENSMUSG00000056515	Rab31	UTR3
9	110428669	110428796	7.5241	34.2015	30.3401	ENSMUSG00000054792	Klhl18	LastExon
6	30390912	30391007	7.5241	34.2015	30.3401	ENSMUSG00000039130	Zc3hc1	Exon1
17	56046986	56047360	7.52287	49.168	45.0385	ENSMUSG00000002835	Chaf1a	Exon1
2	91588662	91588757	7.52287	49.168	45.0385	ENSMUSG00000040549	Ckap5	Exon27
1	166311874	166312427	7.52287	49.168	45.0385	ENSMUSG00000040612	Ildr2	UTR3
10	83365744	83366118	7.52225	64.1514	59.7936	ENSMUSG00000020255	D10Wsu102e	LastExon
3	129825546	129825666	7.52188	79.137	74.5871	ENSMUSG00000028010	Gar1	Exon6
2	180687546	180687792	7.51114	89.928	85.2527	ENSMUSG00000038914	Dido1	Exon4
2	18045808	18046327	7.50606	30.0466	26.2729	ENSMUSG00000054074	Skida1	LastExon
1	139248157	139248536	7.50344	35.6635	31.7738	ENSMUSG00000063681	Crb1	Exon5
12	3966098	3966279	7.50158	40.3591	36.3797	ENSMUSG00000020658	Efr3b	UTR3
14	49773116	49773527	7.50104	44.9643	40.9046	ENSMUSG00000036242	Armh4	Exon2
11	104505377	104505707	7.49896	22.8801	19.2732	ENSMUSG00000020687	Cdc27	UTR3
17	51739650	51740118	7.49716	28.4866	24.7487	ENSMUSG00000023927	Satb1	UTR3
3	95659762	95659982	7.49633	112.405	107.505	ENSMUSG00000038612	Mcl1	Exon2
15	25971795	25971982	7.48998	29.9965	26.2235	ENSMUSG00000022270	Retreg1	LastExon
10	29146538	29146708	7.48998	29.9965	26.2235	ENSMUSG00000038916	Soga3	UTR5
4	136771037	136771433	7.4894	175.624	170.261	ENSMUSG00000028664	Ephb2	Exon3
11	94083899	94083999	7.48786	55.7512	51.5167	ENSMUSG00000020859	Spag9	Exon11
11	86689622	86690150	7.4868	108.213	103.349	ENSMUSG00000072582	Ptrh2	LastExon
11	101278191	101278355	7.48659	134.877	129.799	ENSMUSG00000017188	Coa3	UTR3
8	14033429	14033750	7.48614	21.3238	17.7584	ENSMUSG00000051978	Erich1	Exon4
15	72806634	72809441	7.48236	71.6736	67.2154	ENSMUSG00000047921	Trappc9	LastIntron
10	67547747	67548419	7.4821	41.3003	37.3039	ENSMUSG00000057134	Ado	UTR3
4	123001882	123002227	7.47985	55.7055	51.472	ENSMUSG00000028654	Mycl	UTR3
2	110044337	110044433	7.47933	67.4465	63.0447	ENSMUSG00000027160	Ccdc34	LastExon
4	103162385	103162681	7.47484	40.7588	36.7724	ENSMUSG00000028522	Mier1	LastExon
3	103962263	103962600	7.47484	40.7588	36.7724	ENSMUSG00000044098	Rsbn1	LastExon
13	54661003	54661598	7.47336	78.2392	73.701	ENSMUSG00000025873	Faf2	LastExon
1	100250376	100250468	7.46706	24.1882	20.6243	ENSMUSG00000067028	Cntnap5b	Intron11
7	45707221	45707335	7.46706	24.1882	20.6243	ENSMUSG00000059824	Dbp	Intron2
3	159522684	159522807	7.46706	24.1882	20.6243	ENSMUSG00000028175	Depdc1a	Exon8
3	88436646	88436782	7.46706	24.1882	20.6243	ENSMUSG00000028064	Sema4a	UTR3
15	98591516	98592409	7.46392	60.7137	56.4039	ENSMUSG00000022994	Adcy6	UTR3
6	116406061	116406247	7.4616	63.2478	58.9024	ENSMUSG00000025702	2020-03-08	LastExon
2	117249735	117249832	7.4616	63.2478	58.9024	ENSMUSG00000027349	Fam98b	Exon1
9	20499952	20500460	7.4575	27.8599	24.1341	ENSMUSG00000060510	Zfp266	LastExon
2	103021981	103022077	7.4496	25.6193	22.0227	ENSMUSG00000010914	Pdhx	UTR3
8	124896544	124896882	7.44447	25.7904	22.1134	ENSMUSG00000074030	Exoc8	LastExon
17	26975885	26976292	7.44447	25.7904	22.1134	ENSMUSG00000048731	Ggnbp1	UTR5
8	69765315	69765604	7.44447	25.7904	22.1134	ENSMUSG00000092544	Gm20422	Intron4
X	7820428	7820530	7.44447	25.7904	22.1134	ENSMUSG00000031153	Gripap1	UTR3
1	62815713	62815886	7.44447	25.7904	22.1134	ENSMUSG00000025969	Nrp2	UTR3
15	27606147	27606338	7.44447	25.7904	22.1134	ENSMUSG00000046034	Otulin	UTR3
17	15807366	15807542	7.44447	25.7904	22.1134	ENSMUSG00000048027	Rgmb	LastExon
11	20020848	20021229	7.44447	25.7904	22.1134	ENSMUSG00000045671	Spred2	LastExon
9	121472637	121472849	7.44447	25.7904	22.1134	ENSMUSG00000032536	Trak1	UTR3
2	119297961	119298226	7.44447	25.7904	22.1134	ENSMUSG00000034216	Vps18	UTR3
17	26975885	26976292	7.44447	25.7904	22.1134	ENSMUSG00000079605	Zbtb9	UTR3
8	69765315	69765604	7.44447	25.7904	22.1134	ENSMUSG00000043090	Zfp866	UTR3
14	55753697	55753864	7.44283	36.5512	32.6433	ENSMUSG00000019297	Nop9	LastExon
3	40805068	40805892	7.44283	36.5512	32.6433	ENSMUSG00000025758	Plk4	Exon5
18	78755516	78755754	7.44283	36.5512	32.6433	ENSMUSG00000024548	Setbp1	LastExon
17	80227801	80228021	7.44201	48.2544	44.1396	ENSMUSG00000055760	Gemin6	LastExon
19	24130944	24131217	7.44201	48.2544	44.1396	ENSMUSG00000024812	Tjp2	Exon6
6	47930849	47931122	7.44201	48.2544	44.1396	ENSMUSG00000052763	Zfp212	LastExon
4	141115602	141115757	7.44151	59.0482	54.7632	ENSMUSG00000040842	Szrd1	UTR3
2	49549879	49550126	7.44118	69.8468	65.4128	ENSMUSG00000069495	Epc2	LastExon
3	108412221	108413216	7.43555	56.9781	52.7243	ENSMUSG00000068740	Celsr2	Exon1
8	92360381	92360991	7.42484	77.3444	72.8174	ENSMUSG00000031737	Irx5	Exon3
3	95327460	95327759	7.42463	73.2818	68.8044	ENSMUSG00000015697	Setdb1	Exon15
1	97645505	97646293	7.42142	42.5654	38.5472	ENSMUSG00000044768	D1Ertd622e	UTR3
13	103743326	103743750	7.42138	128.916	123.882	ENSMUSG00000032621	Srek1	UTR3
11	94664046	94664820	7.41855	54.8475	50.627	ENSMUSG00000020868	Xylt2	UTR3
14	60379374	60380450	7.41749	144.701	139.549	ENSMUSG00000021986	Amer2	LastExon
11	60952225	60952347	7.41433	23.1786	19.5642	ENSMUSG00000018932	Map2k3	UTR3
10	128883149	128883614	7.41282	44.0498	40.0051	ENSMUSG00000025352	Gdf11	UTR3
8	90247822	90248407	7.41282	44.0498	40.0051	ENSMUSG00000043668	Tox3	UTR3
10	110944189	110944465	7.41282	44.0498	40.0051	ENSMUSG00000035798	Zdhhc17	LastExon
19	42590702	42591183	7.40835	33.7936	29.9409	ENSMUSG00000025184	R3hcc1l	UTR3
8	84211628	84212279	7.40404	67.9414	63.5328	ENSMUSG00000035671	Zswim4	UTR3
9	94524439	94524697	7.40281	33.2675	29.4256	ENSMUSG00000045414	1190002N15Rik	Exon2
9	122137018	122137527	7.4013	25.6719	21.9972	ENSMUSG00000038145	Snrk	Exon3
12	87453856	87453994	7.40003	120.54	115.575	ENSMUSG00000021039	Snw1	LastExon
X	12056398	12057101	7.39474	80.6468	76.0784	ENSMUSG00000040363	Bcor	Exon4
6	86388532	86389294	7.39205	51.5492	47.3804	ENSMUSG00000029998	Pcyox1	UTR3
11	82765096	82765453	7.39205	51.5492	47.3804	ENSMUSG00000046010	Zfp830	LastExon
18	56575631	56576022	7.39053	146.321	141.158	ENSMUSG00000008301	Phax	Exon2
2	119477620	119477957	7.38913	36.7667	32.9428	ENSMUSG00000034154	Ino80	Intergenic
X	73717499	73717635	7.38681	20.592	17.0449	ENSMUSG00000031378	Abcd1	Exon1
5	143909715	143909810	7.38681	20.592	17.0449	ENSMUSG00000029610	Aimp2	Exon1
7	16614582	16614681	7.38681	20.592	17.0449	ENSMUSG00000058230	Arhgap35	UTR5
9	9204761	9204856	7.38681	20.592	17.0449	ENSMUSG00000050730	Arhgap42	Intron1
3	61364604	61364727	7.38681	20.592	17.0449	ENSMUSG00000053706	B430305J03Rik	UTR5
1	161083053	161083365	7.38681	20.592	17.0449	ENSMUSG00000026708	Cenpl	LastExon
9	15351689	15351790	7.38681	20.592	17.0449	ENSMUSG00000046111	Cep295	Exon4
5	73559753	73560046	7.38681	20.592	17.0449	ENSMUSG00000051674	Dcun1d4	UTR3
13	9665855	9666207	7.38681	20.592	17.0449	ENSMUSG00000048264	Dip2c	LastExon
1	123334065	123334289	7.38681	20.592	17.0449	ENSMUSG00000036815	Dpp10	UTR3
11	22095797	22096118	7.38681	20.592	17.0449	ENSMUSG00000042302	Ehbp1	Exon14
12	73964545	73964658	7.38681	20.592	17.0449	ENSMUSG00000114046	Gm49321	Intron1
15	100011968	100012206	7.38681	20.592	17.0449	ENSMUSG00000023025	Larp4	LastExon
3	104457748	104457874	7.38681	20.592	17.0449	ENSMUSG00000032913	Lrig2	UTR3
10	127699282	127699379	7.38681	20.592	17.0449	ENSMUSG00000040195	Nemp1	UTR3
6	4758801	4758899	7.38681	20.592	17.0449	ENSMUSG00000092035	Peg10	UTR3
1	160226531	160226663	7.38681	20.592	17.0449	ENSMUSG00000026721	Rabgap1l	Exon8
3	61364604	61364727	7.38681	20.592	17.0449	ENSMUSG00000036894	Rap2b	UTR5
7	73417629	73417945	7.38681	20.592	17.0449	ENSMUSG00000070509	Rgma	LastExon
16	22035611	22035744	7.38681	20.592	17.0449	ENSMUSG00000022855	Senp2	Intron10
4	102970058	102970171	7.38681	20.592	17.0449	ENSMUSG00000028524	Sgip1	LastExon
18	35266408	35266692	7.38681	20.592	17.0449	ENSMUSG00000024357	Sil1	UTR3
12	73964545	73964658	7.38681	20.592	17.0449	ENSMUSG00000021113	Snapc1	UTR5
7	127419018	127419175	7.38681	20.592	17.0449	ENSMUSG00000045251	Zfp688	LastExon
8	102633835	102634618	7.38621	40.3845	36.4045	ENSMUSG00000031673	Cdh11	UTR3
1	194619938	194620393	7.38457	87.2551	82.6104	ENSMUSG00000026640	Plxna2	UTR5
6	72318877	72319142	7.38386	24.1105	20.4741	ENSMUSG00000056305	Usp39	UTR3
8	80984888	80985037	7.38229	30.6692	26.8821	ENSMUSG00000038250	Usp38	Exon9
1	132360281	132360629	7.38162	123.846	118.855	ENSMUSG00000042066	Tmcc2	Exon2
12	52516233	52516455	7.38077	21.584	18.0105	ENSMUSG00000035133	Arhgap5	UTR5
16	57571859	57572395	7.38077	21.584	18.0105	ENSMUSG00000022748	Cmss1	Intron1
4	155865996	155866242	7.38077	21.584	18.0105	ENSMUSG00000029073	Cptp	UTR3
16	57571859	57572395	7.38077	21.584	18.0105	ENSMUSG00000043336	Filip1l	LastExon
10	100096196	100096739	7.38077	21.584	18.0105	ENSMUSG00000019966	Kitl	UTR3
15	38295692	38296115	7.38077	21.584	18.0105	ENSMUSG00000037465	Klf10	UTR3
5	75195166	75195520	7.38077	21.584	18.0105	ENSMUSG00000029231	Pdgfra	UTR3
9	65556688	65556895	7.38077	21.584	18.0105	ENSMUSG00000050721	Plekho2	LastExon
14	64028782	64029432	7.38077	21.584	18.0105	ENSMUSG00000046049	Rp1l1	LastExon
3	152821372	152821641	7.38077	21.584	18.0105	ENSMUSG00000039037	St6galnac5	UTR3
4	136954414	136954655	7.37781	39.843	35.8732	ENSMUSG00000028661	Epha8	Intron1
19	5702243	5702650	7.37781	39.843	35.8732	ENSMUSG00000004054	Map3k11	LastExon
5	107619995	107620146	7.37781	39.843	35.8732	ENSMUSG00000033773	Rpap2	Exon8
7	16317313	16317512	7.37682	58.1485	53.8772	ENSMUSG00000002083	Bbc3	UTR3
11	50171149	50171415	7.37616	64.2088	59.8506	ENSMUSG00000036644	Tbc1d9b	LastExon
7	112109948	112110379	7.37603	94.7518	90.0225	ENSMUSG00000059263	Usp47	LastExon
1	36103607	36104496	7.36737	83.9505	79.3436	ENSMUSG00000045216	Hs6st1	LastExon
8	112017839	112018545	7.36737	83.9505	79.3436	ENSMUSG00000033430	Terf2ip	LastExon
7	25272405	25272631	7.36517	65.6496	61.2707	ENSMUSG00000005442	Cic	Exon2
13	51645317	51645421	7.36114	47.3458	43.2457	ENSMUSG00000062248	Cks2	UTR5
4	152058386	152059002	7.36114	47.3458	43.2457	ENSMUSG00000028948	Nol9	LastExon
16	32471527	32471713	7.36114	47.3458	43.2457	ENSMUSG00000005615	Pcyt1a	UTR3
2	158495450	158495824	7.36114	47.3458	43.2457	ENSMUSG00000027652	Ralgapb	LastExon
14	103083051	103083454	7.35845	48.8462	44.7213	ENSMUSG00000022124	Fbxl3	LastExon
9	107681997	107682541	7.35733	66.1003	61.7158	ENSMUSG00000034684	Sema3f	UTR3
9	83395163	83395327	7.35135	29.0576	25.305	ENSMUSG00000032258	Lca5	UTR3
4	62657277	62657494	7.35135	29.0576	25.305	ENSMUSG00000059810	Rgs3	UTR3
12	16984659	16984997	7.35135	29.0576	25.305	ENSMUSG00000020580	Rock2	UTR3
2	61649950	61650209	7.35135	29.0576	25.305	ENSMUSG00000064289	Tank	LastExon
6	100866300	100866596	7.35133	148.748	143.565	ENSMUSG00000052144	Ppp4r2	LastExon
16	33948689	33948981	7.34924	53.948	49.7416	ENSMUSG00000022817	Itgb5	LastExon
1	132991780	132992164	7.34924	53.948	49.7416	ENSMUSG00000054387	Mdm4	LastExon
13	63511561	63512027	7.34853	79.7571	75.1997	ENSMUSG00000021466	Ptch1	UTR3
4	154898953	154899084	7.34742	35.6239	31.8202	ENSMUSG00000029059	Fam213b	Exon1
5	143255242	143255577	7.34528	30.0453	26.2716	ENSMUSG00000046658	Zfp316	LastExon
14	52311670	52312387	7.34421	40.71	36.725	ENSMUSG00000049532	Sall2	UTR3
5	118742604	118742717	7.33549	23.4824	19.8624	ENSMUSG00000018076	Med13l	Exon17
4	62509181	62509302	7.33501	36.5512	32.6433	ENSMUSG00000028393	Alad	LastExon
11	118169045	118169180	7.33501	36.5512	32.6433	ENSMUSG00000017132	Cyth1	Exon12
7	80345622	80345822	7.33501	36.5512	32.6433	ENSMUSG00000030532	Hddc3	LastExon
16	10422537	10422820	7.33501	36.5512	32.6433	ENSMUSG00000022503	Nubp1	Intron7
5	116442589	116442906	7.33501	36.5512	32.6433	ENSMUSG00000063919	Srrm4	UTR3
16	10422537	10422820	7.33501	36.5512	32.6433	ENSMUSG00000050908	Tvp23a	UTR3
17	46646241	46646352	7.33146	38.0146	34.167	ENSMUSG00000002767	Mrpl2	UTR5
3	25436039	25436542	7.32788	28.4822	24.7442	ENSMUSG00000063887	Nlgn1	Exon7
15	82853795	82854571	7.32784	44.1616	40.1156	ENSMUSG00000041852	Tcf20	Exon2
4	148572874	148573306	7.32508	30.9851	27.1909	ENSMUSG00000017264	Exosc10	Intron15
10	81020783	81021157	7.32461	43.1405	39.1123	ENSMUSG00000043670	Diras1	UTR3
5	33600480	33600719	7.32461	43.1405	39.1123	ENSMUSG00000037339	Fam53a	UTR3
18	24284681	24285189	7.32461	43.1405	39.1123	ENSMUSG00000000420	Galnt1	LastExon
1	135371094	135371408	7.32461	43.1405	39.1123	ENSMUSG00000041889	Shisa4	UTR3
18	61715806	61716077	7.31741	50.6455	46.4906	ENSMUSG00000024580	Grpel2	LastExon
2	30960766	30961064	7.31741	50.6455	46.4906	ENSMUSG00000026849	Tor1a	LastExon
10	81318717	81319180	7.31627	97.1736	92.4179	ENSMUSG00000034902	Pip5k1c	UTR3
3	129787889	129788466	7.31163	21.9201	18.3388	ENSMUSG00000093865	Lrit3	UTR3
4	115041428	115041913	7.31163	21.9201	18.3388	ENSMUSG00000028718	Stil	UTR3
2	113833546	113834126	7.30941	171.899	166.559	ENSMUSG00000041219	Arhgap11a	LastExon
10	89805858	89806043	7.30554	34.4306	30.5646	ENSMUSG00000019951	Uhrf1bp1l	Exon14
13	52507678	52507981	7.3049	71.3695	66.9152	ENSMUSG00000047842	Diras2	LastExon
16	32019965	32020133	7.3049	71.3695	66.9152	ENSMUSG00000022781	Pak2	UTR3
15	55015922	55016074	7.30485	36.021	32.1242	ENSMUSG00000037343	Taf2	UTR3
11	113728226	113728991	7.29394	225.008	219.326	ENSMUSG00000041598	Cdc42ep4	UTR3
4	88721082	88721688	7.28992	36.966	33.0499	ENSMUSG00000070923	Klhl9	LastExon
18	82988104	82988199	7.28892	32.8673	29.0338	ENSMUSG00000058881	Zfp516	Exon3
18	88869111	88869485	7.28752	27.8579	24.1321	ENSMUSG00000056153	Socs6	UTR3
16	30957013	30957531	7.28545	22.8544	19.2479	ENSMUSG00000047434	Xxylt1	UTR3
14	65931052	65931170	7.28398	20.3581	16.8182	ENSMUSG00000034463	Scara3	Exon5
17	46413585	46413846	7.28398	20.3581	16.8182	ENSMUSG00000015597	Zfp318	LastExon
13	58381780	58381909	7.28274	24.8447	21.1888	ENSMUSG00000021550	2210016F16Rik	UTR3
5	25315556	25315729	7.28274	24.8447	21.1888	ENSMUSG00000038056	Kmt2c	Exon36
7	16962051	16962208	7.28274	24.8447	21.1888	ENSMUSG00000041141	Pnmal1	UTR3
9	45899797	45899902	7.28274	24.8447	21.1888	ENSMUSG00000042790	Rnf214	Exon3
11	36024120	36024252	7.28274	24.8447	21.1888	ENSMUSG00000049336	Tenm2	Exon29
11	120091521	120091800	7.28274	24.8447	21.1888	ENSMUSG00000025377	Tepsin	UTR3
7	13005899	13006115	7.28274	24.8447	21.1888	ENSMUSG00000049600	Zbtb45	UTR3
15	76911944	76912169	7.28274	24.8447	21.1888	ENSMUSG00000054967	Zfp647	LastExon
15	8218898	8219059	7.28151	32.3408	28.5181	ENSMUSG00000039801	Cplane1	Exon27
3	9693519	9694037	7.28151	32.3408	28.5181	ENSMUSG00000027508	Pag1	UTR3
8	119410001	119410201	7.28077	38.9331	34.9805	ENSMUSG00000074064	Mlycd	LastExon
15	84933559	84933672	7.28077	38.9331	34.9805	ENSMUSG00000016619	Nup50	Exon4
1	132503846	132503962	7.28077	38.9331	34.9805	ENSMUSG00000026439	Rbbp5	UTR3
8	57961179	57961271	7.28039	23.224	19.6831	ENSMUSG00000096914	Galntl6	Intron6
14	34195148	34195297	7.28039	23.224	19.6831	ENSMUSG00000071531	Gprin2	LastExon
11	49261120	49262082	7.28028	46.442	42.3565	ENSMUSG00000020346	Mgat1	LastExon
[truncated: 13,960 more rows]
