# Supplementary material for: m6A epitranscriptomic modification regulates neural progenitor-to-glial cell transition in the retina
Source: eLife. 2022 Dec 2;11:e79994. doi: 10.7554/eLife.79994 (PMC9718531; doi:10.7554/eLife.79994)
Supplement: Source data 4. [file elife-79994-data4.xlsx]

## Sheet: common BP
ID	Description	Count	GeneRatio	pvalue	p.adjust	qvalue	geneID
GO:0006325	chromatin organization	206	206/4175	9.47135e-38	5.90823e-34	4.43758e-34	Selenof/Phf20/Tlk2/Supt16/Fam50a/Chd2/Ash1l/Hcfc2/Suv39h2/Kat6a/Rbl2/Kmt2e/Kdm4b/Pkn1/Znfx1/Spin1/Kmt2a/Chd1/Atrx/Rnf168/Rsf1/Nsd1/Cbx8/Kdm2a/Nap1l2/Arid1a/Kmt2d/Setd1b/Satb1/Arid1b/Chd6/Srcap/Chd9/Ncor1/Actr5/Hcfc1/Dcaf1/Baz1a/Grwd1/Mysm1/Tdrd3/Dr1/Zfp518b/Ep400/Hmgn1/Ehmt1/Chd5/Tet2/Kmt2c/Suz12/Morc2a/Dicer1/Bptf/A730008H23Rik/Tet3/Chaf1a/Rsbn1/Epc2/Setdb1/Bcor/Ino80/Rbbp5/Ino80c/Phf21a/Setd5/U…
GO:0016570	histone modification	197	197/4175	6.62537e-35	1.59966e-31	1.20148e-31	Phf20/Msl2/Ash1l/Ep300/Ntmt1/Rcor3/Suv39h2/Kat6a/Kmt2e/Kdm4b/Pkn1/Kmt2a/Auts2/Atrx/Map3k7/Otub2/Rnf168/Nsd1/Jdp2/Cbx8/Kdm2a/Nap1l2/Pcgf3/Jade1/Kmt2d/Setd1b/Satb1/Phb/Mthfr/Kat14/Phf20l1/Ncor1/Hcfc1/Taf5l/Dcaf1/Isl1/Mysm1/Dr1/Ep400/Ehmt1/Chd5/Tet2/Kmt2c/Suz12/Tet3/Rlf/Mier1/Setdb1/Snw1/Bcor/Rbbp5/Thap7/Setd5/Crebbp/Lcor/Arid4b/Ncoa6/Zbtb7b/Nsd2/Kdm4a/Kat6b/Ing3/Xbp1/Ctcf/Nipbl/Hdac9/Ube2n/Rest/Atx…
GO:0050808	synapse organization	205	205/4175	7.69316e-35	1.59966e-31	1.20148e-31	Crkl/Lrrc4/Plxnb2/Pin1/Efnb2/Ache/Pcdh17/Myo5a/Tanc1/Fzd5/Ctnna2/Lrrtm1/Magi2/Shank2/Nrcam/Slitrk2/Slc8a3/Ank3/St8sia2/Nlgn1/Psen1/Als2/Amigo2/Add2/Tnc/Epha5/Clstn3/Dag1/Actr3/Pik3r1/Igf1r/Lrrn3/Fbxo45/Abi2/Lrrc4b/Flrt2/Dlg5/Cdk5r1/Adgrl3/Sema4d/Zmynd8/Lrrn1/Insr/Ckap5/Pcdh8/Sipa1l1/Ephb2/Nrp2/Sema3f/Rock2/Setd5/Gphn/Adam10/Lrfn4/Lrrc4c/Bsn/F2r/Abl1/Lrfn1/Dab2ip/Cbln2/Lrp8/Unc13b/Glrb/Rest/Lhfpl4…
GO:0007409	axonogenesis	191	191/4175	4.37e-28	6.81502e-25	5.11865e-25	Plxnb2/Efnb2/Ache/Stxbp5/Creb1/Celsr3/Neo1/Ctnna2/Plxna2/Nrcam/Arhgap35/Slitrk2/Auts2/Ank3/Psen1/Foxp1/Als2/Szt2/Ptch1/Stk11/Nova2/Cdh11/Epha5/Dag1/Actr3/Igf1r/Map6/Fbxo45/Apbb2/Nr2e1/Flrt2/Nin/Cdk5r1/Dscam/Isl1/Trio/Cdkl3/Dst/Sema4d/Aatk/Rufy3/Rtn4rl1/Sipa1l1/Ephb2/Nrp2/Trak1/Zdhhc17/Epha8/Sema3f/Pip5k1c/Pak2/Tenm2/Cdh4/Lrrc4c/Abl1/Notch1/Lhx4/Sema4b/Skil/Sema3a/Fezf2/Lgr4/Ulk2/Ngfr/Pten/Sin3a/E…
GO:0006397	mRNA processing	176	176/4175	1.9806e-23	2.471e-20	1.85593e-20	Rbmxl1/Gpatch1/Rbm28/Wdr33/Celf4/Fam50a/Gemin7/Sf3b5/Cdk13/Lsm10/Dbr1/Dhx8/Usp4/Pcf11/Rprd2/Ythdc1/Slu7/Zrsr2/Nova2/Zc3h13/Luc7l3/Sfswap/Gm21992/Rbm4b/Cwf19l2/Scaf8/Ddx20/Srrm4/Wtap/Zfp64/Prpf4/Ubl5/Tardbp/Zpr1/Srek1/Tdrd3/Virma/Cpsf6/Gemin4/Dyrk1a/Cactin/Celf5/Gemin6/Snw1/Zfp830/Ppp4r2/Cstf1/Setx/Safb2/Zcchc8/Srsf5/Scaf11/Pcbp1/Rest/Cdk9/Snip1/Tut1/Rbm15/Cdk12/Leo1/Mtpap/Rbbp6/Rbm15b/Zbtb7a/Clas…
GO:0043161	ubiquitin-dependent protein catabolism	160	160/4175	1.82348e-21	1.13749e-18	8.54347e-19	Sumo1/Dnajb12/Tlk2/Nsfl1c/Rnf34/Herc2/Fem1a/Fem1b/Fbxl14/Rnf144b/Ubqln1/Psen1/Fem1c/Trim2/Dmac2/Trib2/Desi1/Spop/Rnf103/Cdc26/Plk2/Rmnd5a/Maea/Rnf126/Fbxo45/Cul4a/Fbxl12/Sel1l/Psmc6/Anapc1/Dnajb9/Ube2h/Cdc27/Faf2/Fbxl3/Trib1/Axin1/Cul5/Zfand2a/Ube2j2/Armc8/Edem3/Birc2/Crbn/Siah2/Fbxl20/N4bp1/Nfe2l2/Gna12/Eif2ak3/Erlin2/Commd1/Dnajc10/Fbxl19/Fbxo38/Cul3/Canx/Hspa5/Siah1a/Map1a/Kctd2/Gid4/Clec16a/A…
GO:0016358	dendrite development	125	125/4175	1.25164e-19	7.09793e-17	5.33115e-17	Crkl/Ppp1r9b/Ache/Btbd3/Cux1/Ctnna2/Camsap2/Nlgn1/Psen1/Stk11/Epha5/Plk2/Arid1b/Actr3/Map6/Abi2/Nr2e1/Dlg5/Cdk5r1/Dscam/Cdkl3/Tbc1d24/Sema4d/Zmynd8/Sipa1l1/Ephb2/Trak1/Celsr2/Rock2/Pak2/Adam10/Crebbp/Rapgef2/Abl1/Ankrd27/Ss18l2/Fat3/Dab2ip/Sema3a/Fezf2/Lrp8/Iqsec1/Ngfr/Pten/Epha4/Nlgn3/Mapk6/Numbl/Nr3c1/Rap2a/Arf6/Taok2/Dhx36/Afdn/Fyn/Ephb1/Tanc2/Map1a/Nlgn2/Crk/Kidins220/Map1b/Abl2/Srcin1/Prkg1/…
GO:0048880	sensory system development	156	156/4175	1.70735e-19	8.87539e-17	6.66617e-17	Cln8/Ache/Neurod4/Shroom2/Cep290/Celf4/Fzd5/Zeb1/Lrp6/Arhgap35/Hcn1/Rp1/Cdkn1c/Sos1/Tenm3/Jun/Nectin3/Ccdc66/Arid1a/Yy1/Gdf11/Smad3/Spry1/Abi2/Nr2e1/Sox2/Ski/Dscam/Isl1/Mab21l1/Sp3/Hmgn1/Naglu/Kmt2c/Sox8/Twsg1/Rxra/Frs2/Rp1l1/Crb1/Ephb2/Pdgfra/Sall2/Zhx2/Map3k1/Prom1/Pbx1/Mab21l2/Crx/Sipa1l3/Skil/Fat3/Nipbl/Cited2/Nf2/Smarcd3/Tmem231/Rara/Alms1/Impg2/Rpgrip1/Chd7/Zfp513/Dll1/Prph2/Pou4f1/Irx6/Bhl…
GO:0001654	eye development	153	153/4175	5.22254e-19	2.50602e-16	1.88223e-16	Cln8/Ache/Neurod4/Shroom2/Cep290/Celf4/Fzd5/Zeb1/Lrp6/Arhgap35/Hcn1/Rp1/Cdkn1c/Sos1/Tenm3/Jun/Nectin3/Ccdc66/Arid1a/Yy1/Gdf11/Smad3/Spry1/Abi2/Nr2e1/Sox2/Ski/Dscam/Mab21l1/Sp3/Hmgn1/Naglu/Kmt2c/Sox8/Twsg1/Rxra/Frs2/Rp1l1/Crb1/Ephb2/Pdgfra/Sall2/Zhx2/Map3k1/Prom1/Pbx1/Mab21l2/Crx/Sipa1l3/Skil/Fat3/Nipbl/Cited2/Nf2/Smarcd3/Tmem231/Rara/Alms1/Impg2/Rpgrip1/Chd7/Zfp513/Dll1/Prph2/Irx6/Bhlhe22/Ephb1/C…
GO:0034329	cell junction assembly	157	157/4175	1.05833e-18	4.66716e-16	3.50543e-16	Crkl/Lrrc4/Plxnb2/Efnb2/Ache/Pcdh17/Fzd5/Lrrtm1/Ajuba/Magi2/Shank2/Myo9a/Slitrk2/Cdh20/St8sia2/Nlgn1/Amigo2/Pkn2/Jam3/Add2/Cdh11/Smad3/Clstn3/Limch1/Actr3/Pik3r1/Lrrn3/Fbxo45/Abi2/Lrrc4b/Flrt2/Dlg5/Dst/Adgrl3/Sema4d/Lrrn1/Sipa1l1/Pard3/Ephb2/Rock2/Pak2/Setd5/Lrfn4/Rapgef2/Bsn/Abl1/Cldn5/Lrfn1/Cbln2/Lhfpl4/Adgrl2/Cadm1/Pten/Slk/Nlgn3/Sdc4/Arf6/Taok2/Adnp/Tjp1/Pard6b/Eif4g1/Afdn/Ephb1/Dusp3/Bcr/Gap…
GO:0150063	visual system development	153	153/4175	1.12227e-18	4.66716e-16	3.50543e-16	Cln8/Ache/Neurod4/Shroom2/Cep290/Celf4/Fzd5/Zeb1/Lrp6/Arhgap35/Hcn1/Rp1/Cdkn1c/Sos1/Tenm3/Jun/Nectin3/Ccdc66/Arid1a/Yy1/Gdf11/Smad3/Spry1/Abi2/Nr2e1/Sox2/Ski/Dscam/Mab21l1/Sp3/Hmgn1/Naglu/Kmt2c/Sox8/Twsg1/Rxra/Frs2/Rp1l1/Crb1/Ephb2/Pdgfra/Sall2/Zhx2/Map3k1/Prom1/Pbx1/Mab21l2/Crx/Sipa1l3/Skil/Fat3/Nipbl/Cited2/Nf2/Smarcd3/Tmem231/Rara/Alms1/Impg2/Rpgrip1/Chd7/Zfp513/Dll1/Prph2/Irx6/Bhlhe22/Ephb1/C…
GO:0008380	RNA splicing	144	144/4175	1.14214e-17	4.19098e-15	3.14778e-15	Rbmxl1/Rbm28/Celf4/Fam50a/Gemin7/Sf3b5/Cdk13/Lsm10/Dbr1/Dhx8/Usp4/Ythdc1/Slu7/Zrsr2/Nova2/Zc3h13/Luc7l3/Sfswap/Gm21992/Rbm4b/Pik3r1/Cwf19l2/Ddx20/Srrm4/Wtap/Zfp64/Prpf4/Ubl5/Tardbp/Zpr1/Srek1/Rbm12/Virma/Gemin4/Dyrk1a/Cactin/Celf5/Gemin6/Snw1/Zfp830/Ppp4r2/Setx/Zcchc8/Srsf5/Scaf11/Rest/Snip1/Rbm15/Cdk12/Rbm15b/Zbtb7a/Clasrp/Cwf19l1/Cdc5l/Acin1/Nova1/Ess2/Dhx38/Txnl4a/Txnl4a/Snrpd3/Rbm19/Cwc25/Pnn…
GO:0006281	DNA repair	167	167/4175	6.93519e-17	1.96644e-14	1.47696e-14	Fto/Fancl/Ercc4/Pnp/Supt16/Upf1/Herc2/Rnf169/Rad52/Atrx/Otub2/Smc6/Rnf168/Hinfp/Slx4/Vcpip1/Cbx8/Kdm2a/Nbn/Yy1/Usp47/Dclre1a/Lig3/Jmy/Fancf/Actr5/Cul4a/Fam168a/Bach1/Rad54b/Usp10/Hmgn1/Axin2/Atrip/Nsmce3/Fanca/Chaf1a/Epc2/Ino80/Terf2ip/Ppp4r2/Ino80c/Inip/Abl1/Setx/Tnks1bp1/Uvrag/Mbd4/Nsd2/Nipbl/Rev1/Smc1a/Ap5z1/Hdac9/Ube2n/Ap5s1/Cdk9/Dclre1b/Mlh3/Kat7/Rad9b/Atm/Zbtb7a/Mgme1/Commd1/Taok3/Cdc5l/Cin…
GO:0006470	protein dephosphorylation	97	97/4175	5.57926e-16	1.33859e-13	1.0054e-13	Nck1/Ppp1r9b/Pin1/Ppm1d/Ublcp1/Dusp11/Magi2/Ctdsp2/Mfhas1/Mgat5/Mtmr4/Ppp1r12a/Nuak1/Stk11/Ppp2r2c/Ssh2/Sppl3/Smpd1/Ppm1b/Dusp5/Itga1/Ppp6r1/Ankle2/Rpap2/Rock2/Ppp4r2/Phlpp1/Ppp4r3a/Cttnbp2nl/Ppm1a/Ppp2r5e/Ptpn4/Ppp1r7/Fam220a/Fam220a/Pten/Slc39a10/Dusp6/Ptpn21/Dusp3/Tsc1/Ppp1r15b/Dusp4/Akap1/Ptpdc1/Ywhae/Dlc1/Ctdnep1/Mtmr3/Ppp2r1b/Ptpn12/Ctdp1/Pdp1/Pdxp/Ppp4r3b/Ptpn1/Ppp1r16a/Sdhaf2/Ppp3cb/Ptprf…
GO:0060041	retina development	76	76/4175	4.73974e-14	7.78066e-12	5.84393e-12	Cln8/Ache/Neurod4/Cep290/Celf4/Lrp6/Hcn1/Rp1/Nectin3/Ccdc66/Nr2e1/Sox2/Ski/Dscam/Naglu/Sox8/Rp1l1/Crb1/Pdgfra/Zhx2/Prom1/Crx/Fat3/Smarcd3/Alms1/Impg2/Rpgrip1/Chd7/Zfp513/Dll1/Prph2/Irx6/Bhlhe22/Cnga3/Hipk2/Casz1/Six3/Tgfb2/Vsx2/Ntrk2/Gnat2/Pou4f2/Apc/Pax6/Arhgef15/Rab11fip4/Bmpr2/Prox1/Crb2/Tbc1d32/Ahi1/Thrb/Gpm6a/Tulp1/Lama1/Vax2/Tub/Gnb1/Nrl/Pdgfrb/Slc1a1/Rorb/Cdon/Myh10/Rd3/Hipk1/Acvr2b/Nr2e3/…

## Sheet: adult BP
ID	Description	Count	GeneRatio	pvalue	p.adjust	qvalue	geneID
GO:0050808	synapse organization	269	269/5552	3.23383e-49	2.05057e-45	1.40042e-45	Myo5a/Rph3a/Gphn/Nrcam/Adam10/Shank2/Crkl/Unc13b/Nos1ap/Psen1/Cadm1/Lzts3/Ptprf/Bsn/Unc13c/Cbln2/Pclo/Glrb/Dag1/Ntng1/Lgmn/Amigo2/Fbxo45/Ache/Pcdh17/Pik3r1/Prkca/Setd5/Lrrc4b/Slitrk6/Lrrc4c/Cdk5r1/Als2/Abi2/Lrrn3/Drd2/Tanc1/Rock2/Dlg5/Zfp804a/Zmynd8/Igf1r/Igsf21/Nlgn3/Arf6/Drd1/Epha5/Flrt3/Dab2ip/Eif4g1/Tpbg/C1ql1/Add2/Nrxn2/Nlgn1/Sema3e/Amigo1/Slc8a3/Adnp/Ppfia1/Gabra1/Dgkz/Epha4/St8sia2/Sez6l/L…
GO:0016570	histone modification	230	230/5552	2.17489e-33	6.89548e-30	4.70921e-30	Kdm4b/Thap7/Nsd1/Kdm2a/Otub2/Zzz3/Ash1l/Rcor3/Pbxip1/Usp15/Map3k7/Sin3a/Msl2/Mier1/Rlf/Wdr5b/Suv39h2/Pkn1/Snw1/Prkca/Setd5/Phf20/Riox2/Ncoa1/Taf5l/Setd2/Kat6a/Rps6ka5/Rnf168/Nipbl/Ep300/Kdm6b/Ncor1/Cdk9/Kat6b/Jmjd1c/Kmt5b/Kmt2d/Mthfr/Jade2/Jade1/Drd1/Sart3/Auts2/Usp36/Naa40/Atxn7l3/Arid4b/Znhit1/Nsd2/Leo1/Phf20l1/Kat14/Dr1/Kdm4a/Prdm8/Ep400/Wbp2/Ctcf/Kdm5a/Sirt1/Prmt8/Per2/Ctnnb1/Daxx/Nap1l2/Cdc7…
GO:0006325	chromatin organization	233	233/5552	1.50554e-32	3.18221e-29	2.17326e-29	Selenof/Kdm4b/Rsf1/Nsd1/Kdm2a/Epc2/Phf21a/Chd7/Ash1l/Shprh/Rbl2/Hcfc2/Fam50a/Dpf3/Nrde2/Pbrm1/Bptf/Arid1a/Rere/Chd6/Cbx4/Supt16/Suv39h2/Pkn1/Hmg20a/Setd5/Phf20/Znfx1/Actr5/Rccd1/A730008H23Rik/Setd2/Srcap/Kat6a/Hp1bp3/Rnf168/Chd8/Kdm6b/Arid1b/Ncor1/Kat6b/Jmjd1c/Kmt5b/Kmt2d/Chd2/Tlk2/Sart3/Ubn1/Atxn7l3/Arid4b/Znhit1/Nsd2/Ubtf/Prkaa1/Top1/Dr1/Chd9/Kdm4a/Gatad1/Spty2d1/Ep400/Ctcf/Cdan1/Kdm5a/Sirt1/Dn…
GO:0006397	mRNA processing	223	223/5552	1.36071e-28	1.43804e-25	9.82098e-26	Rbmxl1/Snrpn/Rbm28/Pcf11/Zc3h14/Rrp1b/Sf3b1/Celf4/Ppp4r2/Akap17b/Cdk13/Fam50a/Sf3b5/Nrde2/Zrsr1/Rbm15b/Snrpd3/Dbr1/Srrm4/Zc3h13/Pcbp1/Rbm20/Cdc5l/Snip1/Snw1/Wdr33/Zfp64/Scaf8/Nova2/Zfp830/Ppwd1/Srek1/Rbm8a/Ess2/Adarb1/Cstf1/Cdk9/Zmat2/Cactin/Dhx8/Zpr1/Sart3/Adar/Mbnl2/Pan3/Sfswap/Rbm15/Leo1/Cpsf7/Clasrp/Safb2/Zbtb7a/Rprd2/Coil/Pan2/Cdc73/Gemin7/Snrnp200/Khdc4/Hnrnpm/Rbbp6/Cwc25/Gemin4/Setx/Pqbp1/…
GO:0043161	ubiquitin-dependent protein catabolism	207	207/5552	3.33179e-28	3.01813e-25	2.0612e-25	Sumo1/Rnf121/Trib1/Rmnd5a/Herc2/Dnajb9/Rnf103/Trib2/Psen1/Nfe2l2/Cul3/Commd1/Foxred2/Plk2/Glmn/Hspa1b/Rnf19a/Gna12/Fbxo45/Dmac2/Fem1a/Cdc26/Hspa1a/Trim2/Cul1/Fbxo38/Sel1l/Nhlrc3/Rnf144b/Spop/Gid4/Ubxn2a/Fem1b/Fem1c/Tlk2/Ubqln1/Crbn/Zfand2a/Kbtbd7/Dnajc10/Stt3b/Ube2h/Fbxo33/Ankrd9/Appbp2/Csnk1e/Hspa5/Cul5/Fbxl14/Herpud1/Arel1/Topors/Rnf126/Sirt1/Usp19/Anapc1/Ubqln4/Ctnnb1/Cdc23/Ogt/Dnajb12/Axin1/Y…
GO:0007409	axonogenesis	226	226/5552	4.18872e-27	3.32008e-24	2.26742e-24	Lama1/Stxbp5/Nrcam/Stk11/Pak2/Zdhhc17/Psen1/Mycbp2/Tenm2/Plxna2/Sin3a/Ndn/Dag1/Cdh11/Ntng1/Dixdc1/Fbxo45/Ache/Trak1/Map6/B3gnt2/Tgfb2/Aatk/Prkca/Slitrk6/Lgr4/Lrrc4c/Cdk5r1/Unc5d/Als2/Cdkl3/Nova2/Drd2/Arhgap35/Gas1/Adarb1/Igf1r/Spg20/Nlgn3/Sptbn4/Szt2/Auts2/Epha5/Flrt3/Trio/Pip5k1c/Ptch1/Cdh4/Neo1/Apbb2/Sema3e/Sema6a/Lmtk2/Amigo1/Adnp/Epha4/Map3k13/Prdm8/Map2k2/Edn2/Nin/Apc/Lrp4/Rtn4rl1/Ephb1/Golg…
GO:0016358	dendrite development	162	162/5552	3.62427e-26	2.29815e-23	1.5695e-23	Stk11/Pak2/Adam10/Crkl/Psen1/Lzts3/Ptprf/Ppp1r9b/Plk2/Btbd3/Rap2a/Tbc1d24/Rere/Ache/Trak1/Map6/Cdk5r1/Abi2/Cdkl3/Pias2/Camk1d/Camsap2/Rock2/Dlg5/Zmynd8/Arid1b/Mef2a/Nlgn3/Celsr2/Mark1/Arf6/Epha5/Dab2ip/Bbs1/Tpbg/Iqsec1/Fat3/Nlgn1/Slc11a2/Ss18l2/Epha4/Rapgef2/Lrp4/Ephb1/Shank1/Actr3/Crk/Nr3c1/Dscam/Ngfr/Tanc2/Mapk6/Pqbp1/Abl2/Numbl/Abl1/Actr2/Lrp8/Ankrd27/Ppfia2/Chrnb2/Ephb2/Cacna1a/Map2/Prkg1/Ppp…
GO:0099504	synaptic vesicle cycle	125	125/5552	1.94015e-23	1.11841e-20	7.63806e-21	Stxbp5/Chrnb3/Unc13b/Psen1/Napb/Bsn/Unc13c/Clcn3/Pclo/Tbc1d24/Prkce/Rap1b/Dnm1/Pcdh17/Prkca/Cdk5r1/Dgki/Synj2/Tor1a/Drd2/Vps18/Doc2b/Napa/Nlgn3/Grik5/Arf6/Cspg5/Btbd8/Drd1/Pip5k1c/Nlgn1/Stx3/Syt11/Drd4/Snapin/Amph/Ston2/Ctnnb1/Adra2a/Chrna6/Synj1/Nr3c2/Magi2/Nrxn3/Apba1/Fbxl20/Cplx2/Apba2/Bace1/Canx/Rims2/Ppfia3/Itsn2/Nrxn1/Ppfia2/Chrnb2/Fgf14/Cacna1a/Nlgn2/Adcy1/Rims4/Stxbp1/Sptbn2/Slc32a1/Btbd9…
GO:0008380	RNA splicing	185	185/5552	2.21034e-22	1.16798e-19	7.97661e-20	Fus/Rbmxl1/Snrpn/Rbm28/Rrp1b/Sf3b1/Celf4/Ppp4r2/Akap17b/Cdk13/Fam50a/Sf3b5/Nrde2/Zrsr1/Rbm15b/Snrpd3/Dbr1/Srrm4/Zc3h13/Rbm20/Cdc5l/Pik3r1/Snip1/Snw1/Zfp64/Rbm12/Nova2/Zfp830/Ppwd1/Srek1/Rbm8a/Ess2/Zmat2/Cactin/Dhx8/Zpr1/Sart3/Mbnl2/Sfswap/Rbm15/Polr2a/Clasrp/Zbtb7a/Coil/Gemin7/Snrnp200/Rbm12b2/Khdc4/Hnrnpm/Cwc25/Gemin4/Setx/Pqbp1/Ybx1/Casc3/Txnl4a/Txnl4a/Tcerg1/Clp1/Ythdc1/Prpf8/Gemin6/Tardbp/Dhx…
GO:0048880	sensory system development	194	194/5552	5.71845e-22	2.59005e-19	1.76885e-19	Lama1/Rp1/Rs1/Chd7/Cln8/Celf4/Bhlhe23/Dll1/Sall2/Rab11fip4/Rdh10/Mab21l2/Jun/Arid1a/Sox2/Sp3/Ache/Map3k1/Crb1/Tgfb2/Zeb1/Tbx2/Slitrk6/Hcn1/Abi2/Drd2/Fgf9/Arhgap35/Trpm1/Zfp513/Mab21l1/Spred1/Gas1/Nipbl/Prom1/Tenm3/Ski/Rax/Nf2/Gnat2/Fat3/Pbx1/Six3/Yy1/Smad3/Rara/Apc/Spred3/Crb2/Ephb1/Med1/Neurod4/Zeb2/Ctnnb1/Dscam/Frs2/Vsx1/Arhgef15/Cited2/Bbs7/Spry2/Rxra/Crx/Limk2/Kdr/Hipk2/Fzd5/Pdgfrb/Sox8/Twsg1…
GO:0001654	eye development	190	190/5552	2.78168e-21	1.03355e-18	7.05851e-19	Lama1/Rp1/Rs1/Chd7/Cln8/Celf4/Bhlhe23/Dll1/Sall2/Rab11fip4/Rdh10/Mab21l2/Jun/Arid1a/Sox2/Sp3/Ache/Map3k1/Crb1/Tgfb2/Zeb1/Tbx2/Slitrk6/Hcn1/Abi2/Drd2/Fgf9/Arhgap35/Trpm1/Zfp513/Mab21l1/Spred1/Gas1/Nipbl/Prom1/Tenm3/Ski/Rax/Nf2/Gnat2/Fat3/Pbx1/Six3/Yy1/Smad3/Rara/Apc/Spred3/Crb2/Ephb1/Med1/Neurod4/Zeb2/Ctnnb1/Dscam/Frs2/Vsx1/Arhgef15/Cited2/Bbs7/Spry2/Rxra/Crx/Limk2/Kdr/Hipk2/Fzd5/Pdgfrb/Sox8/Twsg1…
GO:0150063	visual system development	191	191/5552	2.83276e-21	1.03355e-18	7.05851e-19	Lama1/Rp1/Rs1/Chd7/Cln8/Celf4/Bhlhe23/Dll1/Sall2/Rab11fip4/Rdh10/Mab21l2/Jun/Arid1a/Sox2/Sp3/Ache/Map3k1/Crb1/Tgfb2/Zeb1/Tbx2/Slitrk6/Hcn1/Abi2/Drd2/Fgf9/Arhgap35/Trpm1/Zfp513/Mab21l1/Spred1/Gas1/Nipbl/Prom1/Tenm3/Ski/Rax/Nf2/Gnat2/Fat3/Pbx1/Six3/Yy1/Smad3/Rara/Apc/Spred3/Crb2/Ephb1/Med1/Neurod4/Zeb2/Ctnnb1/Dscam/Frs2/Vsx1/Arhgef15/Cited2/Bbs7/Spry2/Rxra/Crx/Limk2/Kdr/Hipk2/Fzd5/Pdgfrb/Sox8/Twsg1…
GO:0034329	cell junction assembly	194	194/5552	2.0157e-20	6.39077e-18	4.36452e-18	Myo9a/Pak2/Shank2/Crkl/Cadm1/Bsn/Cbln2/Pclo/Cdh11/Rap1b/Amigo2/Fbxo45/Ache/Pcdh17/Cntnap1/Pik3r1/Prkca/Setd5/Lrrc4b/Slitrk6/Abi2/Lrrn3/Pard6b/Rock2/Dlg5/Nlgn3/Arf6/Flrt3/Eif4g1/Tpbg/Add2/Nrxn2/Nlgn1/Pkn2/Amigo1/Heg1/Adnp/Gabra1/Rapgef2/Smad3/St8sia2/Lrp4/Mdga1/Ephb1/Adgrb1/Gabrb2/Actr3/Bcr/Ctnnb1/Epha3/Macf1/Limch1/Slitrk2/Magi2/Nrxn3/Flcn/Asic2/Fbf1/Nptxr/Tln1/Abl1/Coro2b/Kdr/Slitrk3/Cbln4/Fzd5/…
GO:0006914	autophagy	190	190/5552	3.20275e-19	8.82985e-17	6.03026e-17	Trim30a/Myo5a/Nbr1/Stk11/Dapk1/Foxo3/Tigar/Psen1/Map3k7/Zfyve1/Plk2/Foxk2/Vps13d/Ercc4/Wdr81/Gnai3/Vps13c/Rnf152/Wipi2/Drd2/Vps18/Tnfaip3/Htra2/Ubxn2a/Nrbf2/Tbc1d12/Atg13/Rraga/Retreg1/Mcl1/Epg5/Hk2/Ubqln1/Retreg3/Usp36/Eif4g1/Mul1/Vps33a/Prkaa1/Vps39/Rab43/Tgfbrap1/Ambra1/Kdm4a/Usp10/Atg4b/Fundc1/Mtmr4/Usp30/Foxk1/Keap1/Syt11/Sirt1/Snapin/Smcr8/Synpo2/Vps4a/Atg4c/Rragb/Larp1/Ubqln4/Sbf2/Rptor/Yo…
GO:0009314	response to radiation	187	187/5552	7.9799e-19	2.02402e-16	1.38229e-16	Ppp1ca/Rp1/Rs1/Bhlhe40/Stk11/Usf1/Atxn1/Tigar/Triap1/Jun/Ercc4/Dcun1d3/Crb1/Pik3r1/Pcp2/Actr5/Rad54b/Best1/Usp1/Drd2/Trpm1/Tanc1/Rnf168/Nipbl/Ep300/Atp1a3/Nlgn3/Drd1/Tlk2/Gnat2/Prkaa1/Map3k4/Ercc5/Yy1/Nsmce3/Tnks1bp1/Sirt1/Cacna2d4/Neto1/Per2/Sde2/Tank/Pcare/Rev1/Cngb1/Ckap5/Tmem109/Rpl26/Asic2/Slc24a4/Usp47/Abl2/Rfwd3/Apbb1/Gnb1/Ccdc66/Grk1/Fbxl3/Gadd45a/Ube4b/Egr1/Gucy2f/Creb1/Poli/Atp8a2/Rdh11…

## Sheet: p7 BP
ID	Description	Count	GeneRatio	pvalue	p.adjust	qvalue	geneID
GO:0050808	synapse organization	271	271/6215	1.63224e-40	1.03974e-36	7.30385e-37	Erc1/Abl2/Adgrl2/Lrfn3/Lrrc4c/Lrrtm1/Rest/Flrt3/Sncg/Cbln2/Ssh1/Ank3/Dact1/Asic2/Amigo1/Epha4/Bcan/Shisa7/Pcdhb16/Shank1/Psen1/Cacnb2/Lrrn1/Cyfip1/Mdga2/Drd1/Pcdhgc3/Slitrk3/Slc8a2/Als2/Lrrtm3/Slitrk2/Pclo/Cux2/Unc13a/Abl1/Srcin1/Epha7/Ache/Lrfn1/Lrfn5/Ntrk3/Dhx36/Abi2/Mecp2/Nrg2/Lzts3/Grin2b/Slc8a3/Pcdhgc4/Nlgn3/Setd5/Sorbs2/Efnb2/Tanc2/Cacng2/Kalrn/Tsc1/Prmt3/Arf6/Adgrb3/Gphn/Dlg5/Sema4d/Rapgef…
GO:0016570	histone modification	253	253/6215	6.23102e-37	1.98458e-33	1.39411e-33	Jak2/Rest/Lcor/Incenp/Arid4b/Wdr5b/Nsd2/Smarcad1/Kdm7a/Brd1/Jmjd1c/Drd1/Rlf/Mideas/Ncoa1/Kdm1b/Kdm5d/Flcn/Epop/Setd4/Cbx8/Kmt2c/Prkd2/Rnf168/Atrx/Asxl2/Mecp2/Ep300/Fbll1/Otub2/Ehmt1/Kat6b/Kansl3/Thap7/Setd5/Mthfr/Pax7/Brpf1/Msl3l2/Kmt5b/Paxip1/Ing2/Msl2/Jade1/Suv39h2/Kmt2d/Sap30bp/Sphk2/Auts2/Ntmt1/Prdm8/Prmt6/N6amt1/Setd1a/Glyr1/Zfp451/Cdk9/Ctcf/Daxx/Pml/Phf20l1/Zzz3/Kdm5b/Elk4/Phf14/Rtf1/Nsd1/H…
GO:0006325	chromatin organization	252	252/6215	9.21664e-34	1.957e-30	1.37474e-30	Arid1b/Jak2/Chd9/Chd6/Map1s/Znfx1/Arid4b/Alkbh4/Nsd2/Smarcad1/Kdm7a/Brd1/Rsf1/Jmjd1c/Cebpg/Kdm1b/Kdm5d/Epop/Cbx8/Cdan1/Kmt2c/Grwd1/Ercc6/Myc/Rnf168/Bcorl1/Atrx/Chd1/Tlk1/Hcfc2/Sox9/Nap1l3/Zfp518b/Bptf/Emsy/Ehmt1/Kat6b/Mki67/Baz1a/Brd9/Kansl3/Cbx2/Arid2/Setd5/Morc2a/Tti1/Pax7/Brpf1/Kmt5b/Nrde2/Ing2/Hmg20a/Mcm3ap/Tspyl5/Zfp462/Nap1l5/Smarcd3/Cecr2/Suv39h2/Kmt2d/Sfmbt1/Prmt6/Banp/Mphosph8/N6amt1/Set…
GO:0007409	axonogenesis	250	250/6215	2.34348e-30	3.73198e-27	2.62161e-27	Skil/Raph1/Rtn4rl1/Lrrc4c/Draxin/Lmtk2/Map1s/Flrt3/Sema3a/Map3k13/Ank3/Arhgap35/Amigo1/Gbx2/Epha4/Psen1/B4gat1/Csf1r/Cyfip1/Slitrk3/Celsr3/Als2/Mapk8ip3/Slitrk2/Map2/Sema4c/B4galt5/Abl1/Epha7/Ache/Tsku/Rhog/Ntrk3/Atl1/Stk11/Neo1/Ngfr/Nlgn3/Foxp1/Sema6a/Gas1/Pax6/Efnb2/Kalrn/Tenm2/Map1a/Spg20/Aatk/Usp9x/Sema4d/Bdnf/Unc5c/Ntng1/Sema3e/Plxnc1/Bcl11a/Sema3g/Gsk3b/Bmpr2/Apbb2/Notch1/Szt2/Stxbp5/Cdh11/…
GO:0006397	mRNA processing	236	236/6215	4.16331e-27	3.78862e-24	2.66139e-24	Obi1/Wtap/Ecd/Rest/Rbm15b/Pan3/Ern1/Zpr1/Fastkd5/Scaf8/Prpf4/Setx/Elavl4/Ppp4r2/Csdc2/Srpk1/Cmtr2/Gemin4/Gemin6/Akap17b/Pcf11/Lsm1/Bcl2l2/Snip1/Rbm15/Rbmxl1/Son/Dhx36/Celf5/Nsrp1/Rprd2/Ddx20/Mtpap/Raver1/Ubl5/Rngtt/Wdr33/Cdk13/Rbm6/Cstf2t/Zc3h13/Puf60/Hnrnpm/Nrde2/Srrm4/Alyref2/Luc7l3/Tent4a/Zfp64/Prpf31/Tardbp/Rbm19/Cdk9/Prmt9/Adar/Nup98/Cwc22/Cnot6l/Gm21992/Pde12/Ythdc1/Txnl4b/Cmtr1/Prpf18/Supt…
GO:0043414	macromolecule methylation	170	170/6215	8.36186e-25	6.65813e-22	4.67714e-22	Wtap/Rbm15b/Lcor/Arid4b/Bcdin3d/Wdr5b/Nsd2/Trmt6/Atpsckmt/Rlf/Cmtr2/Pcmt1/Trmt5/Kdm1b/Trmt61a/Fdxacb1/Setd4/Rbm15/Kmt2c/Emg1/Myc/Thada/Atrx/Lcmt2/Asxl2/Mecp2/Fbll1/Ehmt1/Setd5/Prmt3/Etf1/Mthfr/Pax7/Mrm2/Zc3h13/Gsk3b/Kmt5b/Paxip1/Suv39h2/Kmt2d/Auts2/Ntmt1/Prdm8/Zdbf2/Prmt6/Mphosph8/N6amt1/Trmt10c/Setd1a/Prmt9/Mettl21a/Ctcf/Mettl22/Mettl6/Mrm3/Mettl18/Zfp57/Rtf1/Nsd1/Atf7ip/Ash1l/Cmtr1/Setd1b/Mbd4/…
GO:0016358	dendrite development	170	170/6215	1.34869e-24	9.54571e-22	6.70558e-22	Pias2/Arid1b/Abl2/Foxo6/Btbd3/Map1s/Tnik/Kndc1/Sema3a/Dact1/Celsr2/Epha4/Shank1/Psen1/Elavl4/Cyfip1/Map2/Cux2/Abl1/Srcin1/Ache/Dhx36/Fat3/Abi2/Mfsd2a/Mecp2/Stk11/Akap5/Lzts3/Ngfr/Nlgn3/Fbxw8/Tanc2/Kalrn/Map1a/Prmt3/Arf6/Adgrb3/Dlg5/Sema4d/Rapgef4/Bdnf/Bcl11a/Gsk3b/Crkl/Rap2a/Tpbg/Cobl/Myo5b/Zfp365/Tbc1d24/Bbs1/Shank3/Trak1/Camsap2/Plk2/Pak2/Cux1/Crtc1/Ephb1/Iqsec1/Slc25a46/Nr2e1/Gorasp1/Ephb2/Cdk…
GO:0048880	sensory system development	213	213/6215	8.27155e-24	4.78998e-21	3.36482e-21	Skil/Tgif2/Crb2/Rdh13/Smad3/Maf/Rdh10/Fat1/Dll4/Arhgap35/Bhlhe23/Irx5/Alms1/Pbx3/Notch2/Foxf2/Lrp5/Ctns/Ache/Kmt2c/Tsku/Ntrk3/Kdr/Fat3/Abi2/Crb1/Sp3/Mfsd2a/Foxp2/Sox9/Tmem132e/Ski/Pds5b/Sox8/Cnga3/Fjx1/Col8a1/Fgf9/Nectin3/Shroom2/Rara/Gas1/Hcn1/Pax6/Foxc1/Man2a1/Ndp/Tenm3/Spry2/Pou4f1/Sos1/Bdnf/Trpm1/Ccdc66/Pax2/Bmpr2/Rxra/Sdk2/Inhbb/Spred3/Med1/Nhs/Smarcd3/Jag1/Slitrk6/Acvr2b/Hipk2/Ephb1/Stat3/A…
GO:0001654	eye development	210	210/6215	1.17937e-23	6.26049e-21	4.39781e-21	Skil/Tgif2/Crb2/Rdh13/Smad3/Maf/Rdh10/Fat1/Dll4/Arhgap35/Bhlhe23/Irx5/Alms1/Pbx3/Notch2/Foxf2/Lrp5/Ctns/Ache/Kmt2c/Tsku/Ntrk3/Kdr/Fat3/Abi2/Crb1/Sp3/Mfsd2a/Foxp2/Sox9/Ski/Pds5b/Sox8/Cnga3/Fjx1/Col8a1/Fgf9/Nectin3/Shroom2/Rara/Gas1/Hcn1/Pax6/Foxc1/Man2a1/Ndp/Tenm3/Spry2/Sos1/Bdnf/Trpm1/Ccdc66/Pax2/Bmpr2/Rxra/Sdk2/Inhbb/Spred3/Med1/Nhs/Smarcd3/Jag1/Slitrk6/Acvr2b/Hipk2/Ephb1/Stat3/Atp8a2/Pdgfrb/Fzd…
GO:0150063	visual system development	210	210/6215	3.68311e-23	1.67581e-20	1.17721e-20	Skil/Tgif2/Crb2/Rdh13/Smad3/Maf/Rdh10/Fat1/Dll4/Arhgap35/Bhlhe23/Irx5/Alms1/Pbx3/Notch2/Foxf2/Lrp5/Ctns/Ache/Kmt2c/Tsku/Ntrk3/Kdr/Fat3/Abi2/Crb1/Sp3/Mfsd2a/Foxp2/Sox9/Ski/Pds5b/Sox8/Cnga3/Fjx1/Col8a1/Fgf9/Nectin3/Shroom2/Rara/Gas1/Hcn1/Pax6/Foxc1/Man2a1/Ndp/Tenm3/Spry2/Sos1/Bdnf/Trpm1/Ccdc66/Pax2/Bmpr2/Rxra/Sdk2/Inhbb/Spred3/Med1/Nhs/Smarcd3/Jag1/Slitrk6/Acvr2b/Hipk2/Ephb1/Stat3/Atp8a2/Pdgfrb/Fzd…
GO:0050767	regulation of neurogenesis	213	213/6215	2.93491e-20	9.34769e-18	6.56648e-18	Skil/Pias2/Kctd11/Ythdf2/Draxin/Dll4/Rest/Tnik/Sema3a/Map3k13/Amigo1/Yap1/Epha4/Psen1/Spen/Cyfip1/Zfp488/Map2/Cux2/Sema4c/Epha7/Ache/Myc/Ntrk3/Tenm4/Kdr/Dnajb11/Dhx36/Mecp2/Stk11/Akap5/Ski/Sox8/Sema6a/Pax6/Fbxw8/Lig4/Atxn1/Kalrn/Man2a1/Spg20/Heyl/Aatk/Sema4d/Pou4f1/Bdnf/Sema3e/Xrcc2/Vegfc/Plxnc1/Bcl11a/Sema3g/Gsk3b/Bmpr2/Notch1/Arhgef2/Hey2/Olig2/Cx3cr1/Myo5b/Plxna3/Smarcd3/Zfp365/Tbc1d24/Nin/Sha…
GO:0008380	RNA splicing	191	191/6215	4.11966e-19	1.00932e-16	7.09015e-17	Obi1/Wtap/Ecd/Rest/Rbm15b/Ern1/Rbm12b2/Zpr1/Prpf4/Setx/Elavl4/Ppp4r2/Slc38a2/Srpk1/Gemin4/Gemin6/Akap17b/Lsm1/Snip1/Rbm15/Rbmxl1/Son/Celf5/Nsrp1/Ddx20/Raver1/Ubl5/Cdk13/Rbm6/Zc3h13/Puf60/Hnrnpm/Rbm12b1/Nrde2/Srrm4/Alyref2/Luc7l3/Zfp64/Prpf31/Tardbp/Rbm19/Rbm12/Nup98/Cwc22/Gm21992/Ythdc1/Txnl4b/Prpf18/Supt6/Prmt7/Zc3h10/Dyrk1a/Sugp2/Ybx1/Tfip11/Slu7/Zfp638/Gemin7/Snrpa1/Dhx8/Snrnp35/Cdk12/Pik3r1/C…
GO:0034329	cell junction assembly	204	204/6215	1.79834e-18	3.95015e-16	2.77486e-16	Heg1/Adgrl2/Smad3/Smad7/Lrfn3/Lrrtm1/Flrt3/Cbln2/Asic2/Amigo1/Plec/Pcdhb16/Lrrn1/Mdga2/Slitrk3/Lrrtm3/Slitrk2/Pard6b/Cdh20/Pclo/Cux2/Dchs1/Thsd1/Frmpd2/Flcn/Abl1/Src/Epha7/Ache/Lrfn1/Lrfn5/Ntrk3/Kdr/Abi2/Cdh18/Mecp2/Myo9a/Nrg2/Cdh6/Nlgn3/Setd5/Efnb2/Tsc1/Arf6/Adgrb3/Dlg5/Sema4d/Pip5k1a/Bdnf/Tbx5/Gpc6/Gsk3b/Vstm5/Sdk2/Dlc1/Crkl/Lamc1/Cdh11/Pkn2/Lingo2/Fzd1/Tpbg/Bsn/Bcr/Ajuba/Slitrk6/Shank3/Pak2/Ep…
GO:0007264	small GTPase mediated signal transduction	199	199/6215	2.29659e-18	4.71913e-16	3.31505e-16	Abl2/Eps8l1/Heg1/Rfxank/Kndc1/Arhgap35/Sipa1l2/Ralgapb/Cyfip1/Ralbp1/Net1/Cyrib/Als2/Arhgap32/Notch2/Tax1bp3/Kbtbd7/Cd2ap/Flcn/Ctnnal1/Abl1/Myo9b/Src/Nup62/Rhog/Prag1/G3bp2/Abi2/Ralgapa2/Rap2b/Dock6/Ngfr/Arhgap12/Adrb1/Itpkb/Kalrn/Aatk/Arf6/Spry2/Rit1/Sos1/Rapgef4/Arfgap1/Gpsm2/Arhgap17/Syde1/Rab9b/Notch1/Arhgef2/Srgap1/Arhgap24/Dlc1/Rap2a/Arhgap26/Plce1/Bcr/Ccdc88a/Rabif/Rnd3/Abca1/Arhgef7/Auts2…
GO:0043161	ubiquitin-dependent protein catabolic process	198	198/6215	5.52859e-18	1.10054e-15	7.73094e-16	Smad7/Rnf144b/Peli1/Prickle1/Cdc26/Fbxl14/Socs5/Ankib1/Psen1/Fem1c/Eif2ak3/Foxf2/Kbtbd7/Cd2ap/Bag5/Fem1a/Socs4/Fbxl4/Yod1/Trim25/Bfar/Anapc7/Nfe2l2/Trim2/Smurf1/Dcaf11/Rnf122/Spsb4/Fbxw8/Map1a/Spsb2/Klhl20/Fbxl12/Nub1/Ankrd9/Gsk3b/N4bp1/Zfand2a/Armc8/Rffl/Rnf19a/Fbxl18/Mdm2/Pias1/Axin1/Herpud1/Ube2j2/Plk2/Rnf185/Derl1/Erlin1/Sel1l/Cdc23/Ddit3/Dmac2/Fbxw11/Pml/Herc2/Rnf103/Rchy1/Stt3b/Fem1b/Arel1/…

## Sheet: p0 BP
ID	Description	Count	GeneRatio	pvalue	p.adjust	qvalue	geneID
GO:0016570	histone modification	274	274/6308	1.51379e-47	9.65646e-44	6.38341e-44	Phf20/Msl2/Ash1l/Ep300/Ntmt1/Rcor3/Suv39h2/Kat6a/Kmt2e/Kdm4b/Pkn1/Brca1/Kmt2a/Auts2/Atrx/Map3k7/Otub2/Rnf168/Nsd1/Jdp2/Cbx8/Kdm2a/Nap1l2/Pcgf3/Jade1/Kmt2d/Setd1b/Satb1/Phb/Mthfr/Kat14/Phf20l1/Ncor1/Hcfc1/Taf5l/Dcaf1/Snca/Isl1/Bend3/Mysm1/Dr1/Ep400/Ehmt1/Chd5/Tet2/Kmt2c/Suz12/Tet3/Rlf/Mier1/Setdb1/Snw1/Bcor/Rbbp5/Thap7/Setd5/Crebbp/Lcor/Arid4b/Ncoa6/Zbtb7b/Nsd2/Kdm4a/Kat6b/Ing3/Xbp1/Ctcf/Nipbl/Epo…
GO:0006325	chromatin organization	275	275/6308	6.79525e-45	2.16734e-41	1.43272e-41	Selenof/Phf20/Tlk2/Anp32e/Supt16/Fam50a/Chd2/Ash1l/Hcfc2/Suv39h2/Kat6a/Rbl2/Kmt2e/Kdm4b/Pkn1/Znfx1/Spin1/Kmt2a/Chd1/Atrx/Rnf168/Rsf1/Nsd1/Cbx8/Kdm2a/Nap1l2/Arid1a/Kmt2d/Setd1b/Satb1/Arid1b/Chd6/Srcap/Chd9/Ncor1/Tssk6/Actr5/Hcfc1/Dcaf1/Baz1a/Grwd1/Bend3/Mysm1/Tdrd3/Dr1/Zfp518b/Ep400/Hmgn1/Ehmt1/Chd5/Tet2/Kmt2c/Suz12/Morc2a/Smarca5/Dicer1/Bptf/A730008H23Rik/Tet3/Chaf1a/Rsbn1/Epc2/Setdb1/Bcor/Ino80/…
GO:0006281	DNA repair	272	272/6308	2.73107e-38	5.80717e-35	3.83883e-35	Fto/Timeless/Fancl/Ercc4/Pnp/Supt16/Upf1/Herc2/Rnf169/Brca1/Polb/Aunip/Rad52/Smc4/Atrx/Otub2/Smc6/Rnf168/Hinfp/Slx4/Tonsl/Vcpip1/Cbx8/Kdm2a/Nbn/Mcm3/Ercc3/Yy1/Usp47/Dclre1a/Polh/Kif22/Alkbh3/Lig3/Jmy/Fancf/Actr5/Cul4a/Fam168a/Bach1/Ercc1/Rad54b/Usp10/Hmgn1/Axin2/Atrip/Trex1/Nsmce3/Swsap1/Fanca/Chaf1a/Epc2/Ino80/Terf2ip/Ppp4r2/Ino80c/Rad51ap1/Ddx11/Inip/Abl1/Setx/Tnks1bp1/Uvrag/Mbd4/Rmi1/Nsd2/Fam1…
GO:0006397	mRNA processing	259	259/6308	3.27512e-37	5.223e-34	3.45266e-34	Rbmxl1/Gpatch1/Rbm28/Wdr33/Celf4/Fam50a/Gemin7/Sf3b5/Cdk13/Lsm10/Dbr1/Dhx8/Rbm26/Usp4/Pcf11/Hnrnpk/Rprd2/Ythdc1/Slu7/Zrsr2/Nova2/Zc3h13/Luc7l3/Sfswap/Gm21992/Rbm4b/Cwf19l2/Scaf8/Ddx20/Srrm4/Prpf40a/Wtap/Zfp64/Prpf4/Ubl5/Smn1/Snrnp25/Tardbp/Zpr1/Srek1/Tdrd3/Virma/Cpsf6/Gemin4/Dyrk1a/Cactin/Celf5/Gemin6/Snw1/Zfp830/Usp39/Ppp4r2/Cstf1/Setx/Safb2/Zcchc8/Srsf5/Snrpa1/Scaf11/Pcbp1/Sugp1/Rest/Cdk9/Snip1…
GO:0007409	axonogenesis	265	265/6308	1.49886e-36	1.91224e-33	1.26409e-33	Plxnb2/Efnb2/Ache/Stxbp5/Creb1/Celsr3/Neo1/Ctnna2/Plxna2/Nrcam/Arhgap35/Slitrk2/Auts2/Ank3/Psen1/Foxp1/Als2/Szt2/Ptch1/Stk11/Nova2/Pou3f2/Cdh11/Epha5/Dag1/Actr3/Igf1r/Map6/Fbxo45/Apbb2/Nr2e1/Flrt2/Nin/Cdk5r1/Dscam/Isl1/Smn1/Trio/Bcl11a/Cdkl3/Fstl4/Dst/Sema4d/Aatk/Rufy3/Rtn4rl1/Sipa1l1/Ephb2/Sema4a/Nrp2/Trak1/Zdhhc17/Rgma/Epha8/Sema3f/Pip5k1c/Pak2/Tenm2/Cdh4/Lrrc4c/Abl1/Notch1/Lhx4/Sema4b/Vasp/Ski…
GO:0050808	synapse organization	264	264/6308	1.23405e-35	1.31201e-32	8.67302e-33	Crkl/Lrrc4/Rapgef4/Plxnb2/Pin1/Efnb2/Ache/Sdcbp/Pcdh17/Myo5a/Tanc1/Fzd5/Dact1/Ctnna2/Lrrtm1/Magi2/Shank2/Nrcam/Grin2a/Rab39b/Erc1/Slitrk2/Slc8a3/Ank3/St8sia2/Hnrnpk/Nlgn1/Psen1/Als2/Amigo2/Add2/Tnc/Epha5/Clstn3/Dag1/Actr3/Pik3r1/Igf1r/Lrrn3/Fbxo45/Abi2/Lrrc4b/Flrt2/Dlg5/Cdk5r1/Snca/Adgrl3/Sema4d/Zmynd8/Lrrn1/Ndrg1/Insr/Ckap5/Pcdh8/Sipa1l1/Ephb2/Sema4a/Gripap1/Nrp2/Sema3f/Rock2/Setd5/Gphn/Adam10/L…
GO:0008380	RNA splicing	219	219/6308	3.81135e-31	3.47322e-28	2.29598e-28	Rbmxl1/Rbm28/Celf4/Fam50a/Gemin7/Sf3b5/Cdk13/Lsm10/Dbr1/Dhx8/Usp4/Hnrnpk/Ythdc1/Slu7/Zrsr2/Nova2/Zc3h13/Luc7l3/Sfswap/Gm21992/Rbm4b/Pik3r1/Cwf19l2/Ddx20/Srrm4/Prpf40a/Wtap/Zfp64/Prpf4/Ubl5/Smn1/Snrnp25/Tardbp/Zpr1/Srek1/Rbm12/Virma/Gemin4/Dyrk1a/Cactin/Celf5/Gemin6/Snw1/Zfp830/Usp39/Ppp4r2/Setx/Zcchc8/Srsf5/Snrpa1/Scaf11/Sugp1/Rest/Snip1/Rbm15/Zmat5/Scnm1/Cdk12/Rbm15b/Zbtb7a/Raver1/Clasrp/Cwf19l1…
GO:0044770	cell cycle phase transition	254	254/6308	4.72418e-30	3.76694e-27	2.49014e-27	Timeless/Rps27l/Adam17/Mepce/Upf1/Ppm1d/Adamts1/Dact1/Rbl2/Lsm10/Kmt2e/Ctdsp2/Lats1/Fem1b/Brca1/Rptor/Stil/Cdkn1c/Cks1b/Hinfp/Zwint/Nbn/Tcf19/Jade1/Ercc3/Usp47/Cacul1/Mn1/Cdc26/Plk2/Kat14/Map3k11/Sde2/Apbb2/Anapc15/Cul4a/Fbxl12/Bach1/Pdpn/Zpr1/Ccnj/Lats2/Lats2/Acvr1b/Nek1/Atrip/Trex1/Camk2g/Anapc1/Nes/Id2/Cdk5rap2/Cdt1/Klhl18/Cdc27/Zfp830/Ino80/Senp2/Cks2/Fbxl3/Taf2/Crebbp/Pbx1/Ddx3x/Mbd4/Ctdspl/…
GO:0043161	ubiquitin-dependent protein catabolism	220	220/6308	2.18369e-26	1.39298e-23	9.20829e-24	Sumo1/Dnajb12/Tlk2/Sdcbp/Nsfl1c/Rnf34/Herc2/Fem1a/Fem1b/Fbxl14/Rnf144b/Ubqln1/Psen1/Fem1c/Trim2/Dmac2/Trib2/Desi1/Spop/Rnf103/Cdc26/Plk2/Rmnd5a/Maea/Rnf126/Fbxo45/Cul4a/Fbxl12/Sel1l/Erlin1/Psmc6/Anapc1/Dnajb9/Ube2h/Cdc27/Faf2/Fbxl3/Trib1/Axin1/Cul5/Zfand2a/Rnf144a/Ube2j2/Armc8/Edem3/Birc2/Crbn/Kif14/Siah2/Fbxl20/N4bp1/Nfe2l2/Klhl15/Gna12/Eif2ak3/Erlin2/Commd1/Dnajc10/Fbxl19/Fbxo38/Pbk/Cul3/Seleno…
GO:0022613	ribonucleoprotein complex biogenesis	213	213/6308	1.13229e-25	6.01909e-23	3.97892e-23	Rps27l/Bysl/Celf4/Gemin7/Gnl3l/Nvl/Utp14b/Usp4/Rpusd1/Ythdc1/Slu7/C1d/Zrsr2/Mrps2/Nob1/Luc7l3/Sfswap/Mcts2/Mdn1/Ddx20/Cul4a/Smn1/Isg20l2/Eri2/Urb1/Cpsf6/Gemin4/Ckap5/Dicer1/Znhit3/Celf5/Mettl16/Gar1/Nop9/Gemin6/Usp39/Nol9/Exosc10/Setx/Ythdf2/Ddx3x/Ddx54/Ddx18/Rpp38/Srfbp1/Scaf11/Brix1/Nop56/Tbl3/Ddx52/Fam207a/Pwp2/Suv39h1/Pten/Eif2a/Atm/Eif3a/Chd7/Rrp36/Nip7/Ago2/Nop58/Pop4/Tsr2/Mrm2/Mak16/Snrpd3…
GO:0048880	sensory system development	216	216/6308	3.10807e-24	1.23915e-21	8.19141e-22	Cln8/Ache/Neurod4/Shroom2/Cep290/Celf4/Fzd5/Zeb1/Lrp6/Arhgap35/Hcn1/Rp1/Cdkn1c/Nhs/Sos1/Tenm3/Jun/Nectin3/Ccdc66/Arid1a/Inhbb/Yy1/Gdf11/Traf3ip1/Fat1/Smad3/Clic4/Spry1/Abi2/Nr2e1/Sox2/Ski/Dscam/Isl1/Mab21l1/Sp3/Irx5/Hmgn1/Naglu/Kmt2c/Spred2/Sox8/Twsg1/Rxra/Frs2/Rp1l1/Crb1/Ephb2/Pdgfra/Sall2/Zhx2/Vhl/Map3k1/Prom1/Pbx1/Mab21l2/Crx/Sipa1l3/Skil/Fat3/Nipbl/Dll4/Sox11/Phactr4/Cited2/Nf2/Smarcd3/Tmem23…
GO:0001654	eye development	213	213/6308	4.26795e-24	1.60148e-21	1.05866e-21	Cln8/Ache/Neurod4/Shroom2/Cep290/Celf4/Fzd5/Zeb1/Lrp6/Arhgap35/Hcn1/Rp1/Cdkn1c/Nhs/Sos1/Tenm3/Jun/Nectin3/Ccdc66/Arid1a/Inhbb/Yy1/Gdf11/Traf3ip1/Fat1/Smad3/Clic4/Spry1/Abi2/Nr2e1/Sox2/Ski/Dscam/Mab21l1/Sp3/Irx5/Hmgn1/Naglu/Kmt2c/Spred2/Sox8/Twsg1/Rxra/Frs2/Rp1l1/Crb1/Ephb2/Pdgfra/Sall2/Zhx2/Vhl/Map3k1/Prom1/Pbx1/Mab21l2/Crx/Sipa1l3/Skil/Fat3/Nipbl/Dll4/Sox11/Phactr4/Cited2/Nf2/Smarcd3/Tmem231/Rar…
GO:0034470	ncRNA processing	190	190/6308	6.96712e-24	2.46907e-21	1.63218e-21	Bysl/Elp6/Bcdin3d/Pus3/Nvl/Mettl6/Rpp25l/Utp14b/Rpusd1/C1d/Mocs3/Dph3/Nob1/Mdn1/Thumpd1/Tut4/Eri2/Urb1/Rpp14/Dicer1/Znhit3/Mettl16/Gar1/Nop9/Nol9/Exosc10/2210016F16Rik/Mettl2/Pus1/Ythdf2/Dgcr8/Ddx3x/Ddx54/Trnt1/Zcchc8/Ddx18/Rpp38/Srfbp1/Brix1/Tbl3/Ddx52/Fam207a/Pwp2/Elac1/Ankrd16/Suv39h1/Tut1/Chd7/Rrp36/Trub2/Ints5/Ago2/Ints7/Pop4/Tsr2/Mrm2/Tut7/Trub1/Mak16/Kri1/Ago1/Mrm3/Mrto4/Rpf1/Dkc1/Alkbh1/E…
GO:0016358	dendrite development	170	170/6308	7.91392e-24	2.657e-21	1.75641e-21	Crkl/Rapgef4/Ppp1r9b/Ache/Btbd3/Cux1/Dact1/Ctnna2/Camsap2/Hnrnpk/Nlgn1/Psen1/Stk11/Epha5/Plk2/Arid1b/Actr3/Map6/Abi2/Nr2e1/Dlg5/Cdk5r1/Dscam/Bcl11a/Cdkl3/Fstl4/Tbc1d24/Nck2/Sema4d/Zmynd8/Sipa1l1/Ephb2/Trak1/Celsr2/Rock2/Pak2/Adam10/Crebbp/Rapgef2/Abl1/Ankrd27/Ss18l2/Fat3/Dab2ip/Sema3a/Fezf2/Lrp8/Iqsec1/Ngfr/Pten/Epha4/Nlgn3/Flrt1/Mapk6/Numbl/Nr3c1/Rap2a/Arf6/Taok2/Dhx36/Chrna3/Afdn/Fyn/Ephb1/Tanc…
GO:0150063	visual system development	213	213/6308	1.36836e-23	4.36439e-21	2.88508e-21	Cln8/Ache/Neurod4/Shroom2/Cep290/Celf4/Fzd5/Zeb1/Lrp6/Arhgap35/Hcn1/Rp1/Cdkn1c/Nhs/Sos1/Tenm3/Jun/Nectin3/Ccdc66/Arid1a/Inhbb/Yy1/Gdf11/Traf3ip1/Fat1/Smad3/Clic4/Spry1/Abi2/Nr2e1/Sox2/Ski/Dscam/Mab21l1/Sp3/Irx5/Hmgn1/Naglu/Kmt2c/Spred2/Sox8/Twsg1/Rxra/Frs2/Rp1l1/Crb1/Ephb2/Pdgfra/Sall2/Zhx2/Vhl/Map3k1/Prom1/Pbx1/Mab21l2/Crx/Sipa1l3/Skil/Fat3/Nipbl/Dll4/Sox11/Phactr4/Cited2/Nf2/Smarcd3/Tmem231/Rar…
